# Supplementary material for: An atom- and pot-economical consecutive multi-step reaction approach to polycyclic aromatic hydrocarbons (PAHs)
Source: Royal Society of Chemistry journal article supplement (doi:10.1039/c6cc09108c), 2017-01-01

## Atom- and Pot-Economical Consecutive Multi-Step Reaction Approach to Polycyclic Aromatic Hydrocarbons (PAHs)

Chada Raji Reddy,\* Uredi Dilipkumar and Ravula Shravya  
Division of Natural Products Chemistry, CSIR-Indian Institute of Chemical Technology, Hyderabad-500607  
E-mail: [rajireddy@iict.res.in](mailto:rajireddy@iict.res.in)

### Table of Contents

|                                                                               |           |
|-------------------------------------------------------------------------------|-----------|
| 1. General information -                                                      | S2        |
| 2. Optimization Table S1                                                      | S3        |
| 2. Experimental procedures and Characterization Data -                        | S4-S25    |
| 3. References -                                                               | S26       |
| 3. <sup>1</sup> H NMR and <sup>13</sup> C NMR spectra for all new compounds - | S27- S100 |

**General Experimental:**

All reactions were carried out under inert atmosphere with oven-dried glassware. Reagents and solvents were used without further purification, unless otherwise stated. All reactions were magnetically stirred and monitored by thin-layer chromatography carried out on silica plates using UV-light and anisaldehyde for visualization. Column chromatography was performed on silica gel (60–120 and 100-200 mesh) using hexanes and ethyl acetate as eluent. Evaporation of solvents was conducted under reduced pressure at temperatures less than 45 °C.  $^1\text{H}$  and  $^{13}\text{C}$  NMR spectra were recorded in  $\text{CDCl}_3$  solvent on a 300 MHz, 500 MHz and 400 MHz NMR spectrometer. Chemical shifts  $\delta$  and coupling constants  $J$  are given in ppm (parts per million) and Hz (hertz) respectively. Chemical shifts are reported relative to residual solvent as an internal standard for  $^1\text{H}$  and  $^{13}\text{C}$  ( $\text{CDCl}_3$ :  $\delta$  7.26 ppm for  $^1\text{H}$  and 77.0 ppm for  $^{13}\text{C}$ ). Mass spectra were obtained on Finnigan MAT1020B, micro mass VG 70–70H or LC/MSD trap SL spectrometer operating at 70 eV using direct inlet system.

**Table S1:** Optimization of reaction conditions<sup>a</sup>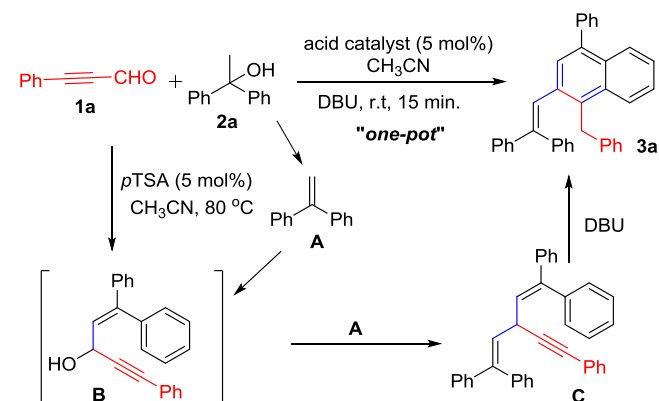

| Entry          | Dehydration / Addition-Substitution (catalyst-5 mol%, temp, time) | Cycloisomerization (base, temp., time) | Product   | Yield (%) <sup>b</sup> |
|----------------|-------------------------------------------------------------------|----------------------------------------|-----------|------------------------|
| 1 <sup>c</sup> | Cu(OTf) <sub>2</sub> , rt, 24 h                                   | ----                                   | <b>C</b>  | 19                     |
| 2              | Cu(OTf) <sub>2</sub> , rt, 24 h                                   | ----                                   | <b>C</b>  | 35                     |
| 3              | BF <sub>3</sub> ·Et <sub>2</sub> O, rt, 24 h                      | -----                                  | <b>C</b>  | 27                     |
| 4              | <i>p</i> TSA, rt, 24 h                                            | -----                                  | <b>C</b>  | 57                     |
| 5              | <i>p</i> TSA, 80 °C, 2 h                                          | -----                                  | <b>C</b>  | 94                     |
| 6              | Cu(OTf) <sub>2</sub> , 80 °C, 3.5 h                               | ----                                   | <b>C</b>  | 83                     |
| 7              | ZnCl <sub>2</sub> , 80 °C, 24 h                                   | ----                                   | <b>C</b>  | 10                     |
| 8              | FeCl <sub>3</sub> , 80 °C, 24 h                                   | ----                                   | <b>C</b>  | 59                     |
| 9 <sup>d</sup> | -                                                                 | DBU, rt, 15 min                        | <b>3a</b> | 92                     |
| 10             | Cu(OTf) <sub>2</sub> , 80 °C, 3.5 h                               | DBU, rt, 15 min                        | <b>3a</b> | 72                     |
| 11             | <b><i>p</i>TSA, 80 °C, 2 h</b>                                    | <b>DBU, rt, 15 min</b>                 | <b>3a</b> | <b>87</b>              |

<sup>a</sup>Propargylic aldehyde (1 equiv.) and 1,1-diarylethanol (2 equiv.) in CH<sub>3</sub>CN

<sup>b</sup>Isolated yields; <sup>c</sup>One equivalent of **2a** was used; <sup>d</sup>Conversion of **C** to **3a**

The reaction of propargylic aldehyde **1a** and 1,1-diphenylethanol (**2a**) in the presence of various acid catalysts to find the optimal catalyst for the formation of ene-yne through dehydration (to give **A**) followed by nucleophilic addition (to give **B**). Interestingly, it provided a di-alkenyl product **C** in 19% yield at room temperature in the presence of Cu(OTf)<sub>2</sub> (entry 1, Table 1). This suggests, the aldehyde underwent nucleophilic addition to **B** followed by immediate nucleophilic substitution with **A** in acidic reaction conditions to give **C**. Then, the reaction was carried out using 2 equivalents of **2a** at room temperature in the presence of different acid catalysts and observed that the reaction was not completed even after 24 h to give **C** (entries 2 to 4, Table 1). We found that when the reaction carried out at 80 °C in presence of *p*TSA in CH<sub>3</sub>CN, product **C** could be produced in 94% isolated yield (entry 5, Table 1). Other acid catalysts, Cu(OTf)<sub>2</sub>, FeCl<sub>3</sub> also showed similar effect in providing the product **C**, while ZnCl<sub>2</sub> was less effective (entries 6 to 8, Table 1). Based on earlier work on cycloisomerization reactions, the conversion of **C** to naphthalene was tested using DBU and found that the reaction proceeded smoothly to give vinylated naphthalene **3a** in 92% yield (entry 9, Table 1). Further, the reaction conditions were tested for all the four reactions uninterruptedly in one-pot (entries 10 and 11, Table 1). Gratifyingly, the successful formation of naphthalene **3a** was observed in 87% yield.

Acetylenic aldehydes (**1a**, **1b**, **1c**, **1e**, **1g**, **1h**),<sup>1a</sup> **1d**,<sup>1b</sup> (**1f**, **1i**)<sup>1c</sup> have been prepared using the literature procedure and the data compared.<sup>1</sup>

1,1-Diarylethan-1-ols (**2a**, **2b**, **2c**, **2e**, **2g**),<sup>2a</sup> **2d**, **2f**,<sup>2b</sup> have been prepared using the literature protocols and the spectral data compared.<sup>2</sup>

**General procedure for the preparation of naphthalenes (3a-3i):** To a stirred solution of propargylic aldehyde **1** (1.0 mmol) and 1,1-diphenyletha-2-ol **2a** (2.0 mmol) in 5 mL of acetonitrile was added *p*TSA (5 mol%) at room temperature. The reaction mixture was stirred at 80 °C for 1.5-3 h and the reaction mixture was cooled to room temperature. To the reaction mixture DBU (1.0 mmol) was added and stirred for 10-30 min at room temperature. After completion of reaction (monitored by TLC), the mixture was concentrated under reduced pressure. The residue was purified by column chromatography on silica gel (EtOAc:hexanes) to afford the corresponding 2-vinylated naphthalenes.

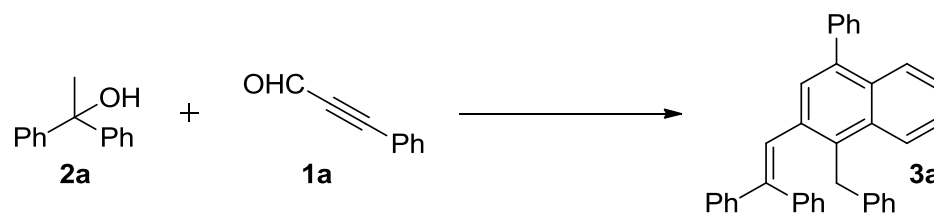

**1-Benzyl-2-(2,2-diphenylvinyl)-4-phenylnaphthalene (3a):** 127 mg, 87% yield, white solid;  $R_f = 0.4$  (hexanes) mp 151-153 °C; <sup>1</sup>H NMR (500 MHz, CDCl<sub>3</sub>):  $\delta$  8.03 (d,  $J = 8.3$  Hz, 1H), 7.82 (d,  $J = 8.4$  Hz, 1H), 7.43–7.38 (m, 1H), 7.37–7.27 (m, 11H), 7.25–7.14 (m, 7H), 7.06 (dd,  $J = 6.7, 5.3$  Hz, 2H), 7.04–7.00 (m, 2H), 6.95 (s, 1H), 4.65 (s, 2H); <sup>13</sup>C NMR (100 MHz, CDCl<sub>3</sub>):  $\delta$  144.8, 143.1, 140.5, 140.3, 140.2, 138.0, 134.8, 134.0, 132.9, 132.8, 131.1, 130.0, 128.5, 128.3, 128.2, 128.1, 127.9, 127.6, 127.4, 127.3, 127.2, 126.9, 126.4, 125.9, 125.9, 125.4, 125.0, 34.8; IR (KBr): 3025, 1599, 1492, 1444, 1216, 1074, 1030, 901, 758, 698 cm<sup>-1</sup>; MS (EI):  $m/z$  472 (M)<sup>+</sup>; HRMS (EI):  $m/z$  calcd for C<sub>37</sub>H<sub>28</sub> (M)<sup>+</sup>: 472.2191, found: 472.2187.

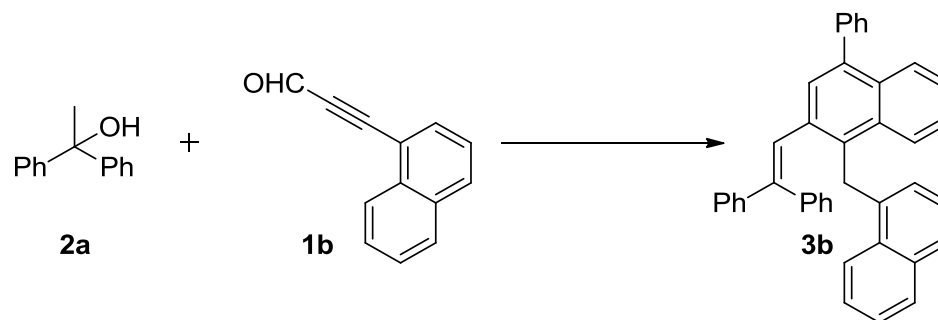

**2-(2,2-Diphenylvinyl)-1-(naphthalen-1-ylmethyl)-4-phenylnaphthalene (3b):** 120 mg, 83% yield, white solid;  $R_f = 0.3$  (hexanes); mp 137-139 °C;  $^1\text{H NMR}$  (500 MHz,  $\text{CDCl}_3$ ):  $\delta$  8.37 (d,  $J = 8.3$  Hz, 1H), 7.92 (d,  $J = 8.0$  Hz, 1H), 7.88–7.84 (m, 1H), 7.80 (t,  $J = 8.5$  Hz, 1H), 7.72 (d,  $J = 8.2$  Hz, 1H), 7.65–7.60 (m, 1H), 7.60–7.54 (m, 1H), 7.51–7.46 (m, 1H), 7.36–7.26 (m, 9H), 7.23–7.20 (m, 4H), 7.19–7.14 (m, 3H), 7.07 (dd,  $J = 7.7, 1.7$  Hz, 2H), 7.01 (s, 1H), 6.82 (d,  $J = 6.4$  Hz, 1H), 5.05 (s, 2H);  $^{13}\text{C NMR}$  (125 MHz,  $\text{CDCl}_3$ ):  $\delta$  145.1, 142.9, 140.5, 140.4, 138.2, 137.6, 135.6, 135.5, 133.7, 133.4, 133.1, 132.4, 132.0, 131.2, 131.0, 130.1, 128.8, 128.3, 128.1, 128.0, 127.6, 127.3, 127.0, 126.9, 126.7, 126.4, 126.1, 125.9, 125.8, 125.7, 125.5, 125.3, 125.1, 123.3, 31.8; IR (KBr): 3055, 1596, 1522, 1468, 1397, 1029, 791, 757, 669  $\text{cm}^{-1}$ ; MS (EI):  $m/z$  522 ( $\text{M}^+$ ); HRMS (EI):  $m/z$  calcd for  $\text{C}_{41}\text{H}_{30}$  ( $\text{M}^+$ ): 522.2347, found: 522.2340.

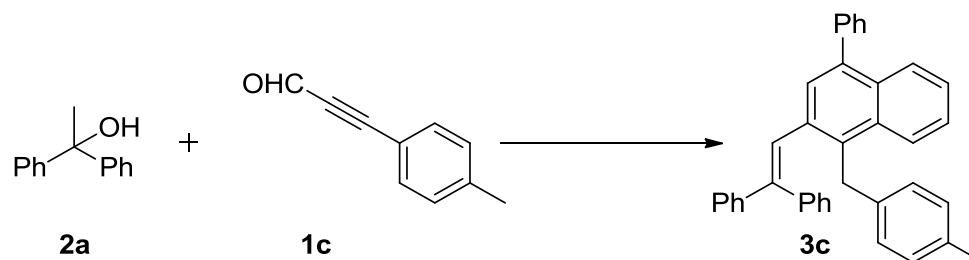

**2-(2,2-Diphenylvinyl)-1-(4-methylbenzyl)-4-phenylnaphthalene (3c):** 155 mg, 92% yield, white solid;  $R_f = 0.3$  (hexanes) mp 133-135 °C;  $^1\text{H NMR}$  (500 MHz,  $\text{CDCl}_3$ ):  $\delta$  8.02 (d,  $J = 8.5$  Hz, 1H), 7.82 (d,  $J = 8.3$  Hz, 1H), 7.39 (t,  $J = 7.6$  Hz, 1H), 7.36–7.25 (m, 11H), 7.25–7.18 (m, 2H), 7.11–7.04 (m, 6H), 7.04–6.98 (m, 2H), 6.94 (d,  $J = 1.1$  Hz, 1H), 4.61 (s, 2H), 2.29 (s, 3H);  $^{13}\text{C NMR}$  (75 MHz,  $\text{CDCl}_3$ ):  $\delta$  144.6, 143.1, 140.5, 140.2, 137.9, 137.1, 135.3, 134.7, 134.2, 132.8, 131.0, 130.0, 129.1, 128.2, 128.1, 127.9, 127.6, 127.47, 127.2, 126.8, 126.4, 125.8,

125.3, 125.0, 34.3, 21.0; IR (KBr): 3022, 1595, 1511, 1492, 1443, 1216, 1030, 758, 699  $\text{cm}^{-1}$ ; MS (EI):  $m/z$  486 ( $\text{M}^+$ ); HRMS (EI):  $m/z$  calcd for  $\text{C}_{38}\text{H}_{30}$  ( $\text{M}^+$ ): 486.2348, found: 486.2343.

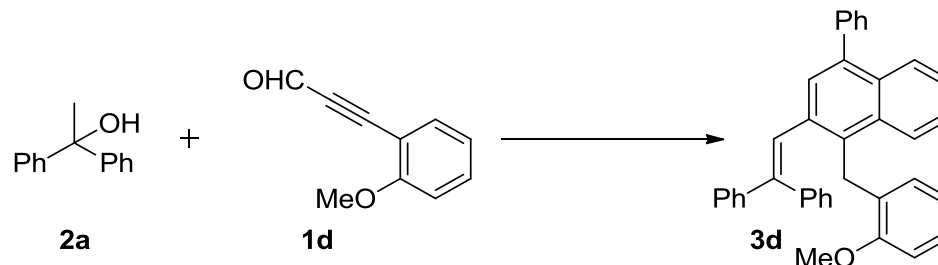

**2-(2,2-Diphenylvinyl)-1-(2-methoxybenzyl)-4-phenylnaphthalene (3d):** 59 mg, 82% yield, white solid;  $R_f = 0.3$  (hexanes: EtOAc = 95:5); mp 101-103  $^{\circ}\text{C}$ ;  $^1\text{H}$  NMR (400 MHz,  $\text{CDCl}_3$ ):  $\delta$  7.93 (d,  $J = 8.1$  Hz, 1H), 7.82 (dd,  $J = 7.7, 6.4$  Hz, 1H), 7.40–7.27 (m, 10H), 7.25–7.14 (m, 5H), 7.10–7.05 (m, 2H), 7.04–7.00 (m, 2H), 6.94 (s, 1H), 6.89 (d,  $J = 8.1$  Hz, 1H), 6.80–6.66 (m, 2H), 4.58 (s, 2H), 3.87 (s, 3H);  $^{13}\text{C}$  NMR (75 MHz,  $\text{CDCl}_3$ ):  $\delta$  156.9, 144.5, 143.3, 140.6, 140.4, 137.8, 135.1, 134.2, 133.1, 131.1, 130.9, 130.0, 128.8, 128.5, 128.2, 128.1, 127.9, 127.6, 127.5, 127.2, 126.9, 126.8, 126.3, 125.8, 125.3, 125.1, 120.4, 109.7, 55.2, 28.3; IR (KBr): 2924, 1597, 1502, 1446, 1379, 1073, 1030, 770, 699  $\text{cm}^{-1}$ ; MS (EI):  $m/z$  502 ( $\text{M}^+$ ); HRMS (EI):  $m/z$  calcd for  $\text{C}_{38}\text{H}_{30}\text{O}$  ( $\text{M}^+$ ): 502.2297, found: 502.2291.

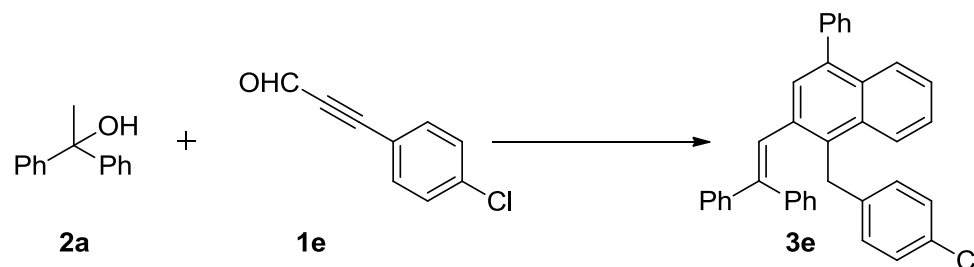

**1-(4-Chlorobenzyl)-2-(2,2-diphenylvinyl)-4-phenylnaphthalene (3e):** 139 mg, 90% yield, pale yellow solid;  $R_f = 0.8$  (hexanes: EtOAc = 95:5) mp 186-189  $^{\circ}\text{C}$ ;  $^1\text{H}$  NMR (500 MHz,  $\text{CDCl}_3$ ):  $\delta$  7.95 (d,  $J = 8.3$  Hz, 1H), 7.83 (d,  $J = 8.3$  Hz, 1H), 7.45–7.39 (m, 1H), 7.38–7.26 (m, 10H), 7.25–7.19 (m, 5H), 7.13–7.00 (m, 6H), 6.95 (s, 1H), 4.60 (s, 2H);  $^{13}\text{C}$  NMR (100 MHz,  $\text{CDCl}_3$ ):  $\delta$  145.1, 143.1, 140.4, 140.1, 138.7, 138.3, 134.9, 133.3, 132.7, 131.7, 131.1, 131.0, 130.0, 129.6, 128.6, 128.2, 128.1, 128.0, 128.0, 127.8, 127.3, 127.1, 127.0, 126.6, 126.0,

125.5, 124.7, 34.1; IR (KBr): 3023, 1592, 1488, 1442, 1382, 1180, 1074, 793, 754, 698  $\text{cm}^{-1}$ ; MS (EI):  $m/z$  506 ( $\text{M}^+$ ); HRMS (EI):  $m/z$  calcd for  $\text{C}_{37}\text{H}_{27}\text{Cl}$  ( $\text{M}^+$ ): 506.1801, found: 506.1800.

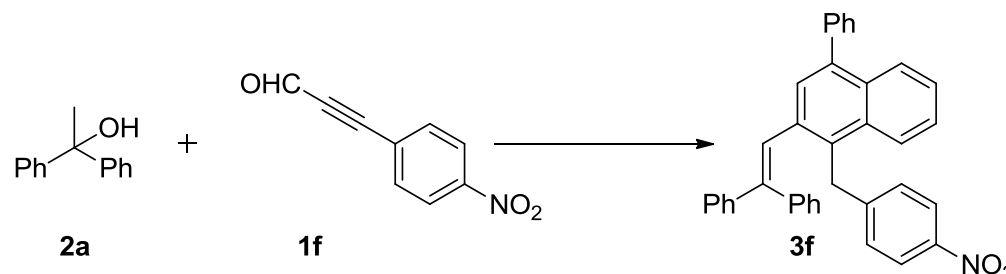

**2-(2,2-Diphenylvinyl)-1-(4-nitrobenzyl)-4-phenylnaphthalene (3f):** 127 mg, 88% yield, pale yellow solid;  $R_f = 0.4$  (hexanes: EtOAc = 95:5) mp 121-123  $^{\circ}\text{C}$ ;  $^1\text{H}$  NMR (400 MHz,  $\text{CDCl}_3$ ):  $\delta$  8.11 (d,  $J = 8.8$  Hz, 2H), 7.86 (dd,  $J = 12.0, 4.6$  Hz, 2H), 7.45–7.27 (m, 12H), 7.26–7.19 (m, 3H), 7.15 (s, 1H), 7.07–7.01 (m, 4H), 6.99 (s, 1H), 4.73 (s, 2H);  $^{13}\text{C}$  NMR (100 MHz,  $\text{CDCl}_3$ ):  $\delta$  148.2, 146.4, 145.5, 142.9, 140.1, 139.8, 138.8, 135.1, 132.5, 131.9, 131.1, 130.9, 129.9, 129.0, 128.2, 128.1, 128.0, 127.9, 127.4, 127.0, 126.7, 126.5, 126.2, 125.6, 124.3, 123.7, 34.7.; IR (KBr): 3023, 1596, 1516, 1492, 1343, 1216, 1074, 1015, 754, 699  $\text{cm}^{-1}$ ; MS (EI):  $m/z$  517 ( $\text{M}^+$ ); HRMS (EI):  $m/z$  calcd for  $\text{C}_{37}\text{H}_{27}\text{NO}_2$  ( $\text{M}^+$ ): 517.2041, found: 517.2039.

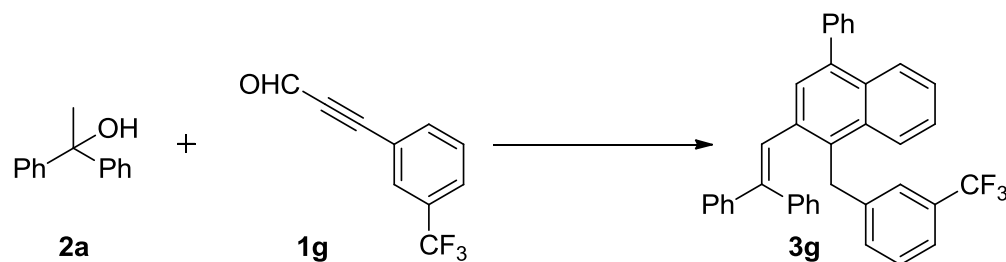

**2-(2,2-Diphenylvinyl)-4-phenyl-1-(3-(trifluoromethyl)benzyl)naphthalene (3g):** 113 mg, 83% yield, semisolid;  $R_f = 0.4$  (hexanes: EtOAc = 95:5);  $^1\text{H}$  NMR (400 MHz,  $\text{CDCl}_3$ ):  $\delta$  7.97 (d,  $J = 8.1$  Hz, 1H), 7.84 (dt,  $J = 8.2, 4.0$  Hz, 1H), 7.51 (s, 1H), 7.47–7.39 (m, 2H), 7.38–7.25 (m, 12H), 7.25–7.18 (m, 3H), 7.07–7.00 (m, 4H), 6.97 (s, 1H), 4.69 (s, 2H).;  $^{13}\text{C}$  NMR (100 MHz,  $\text{CDCl}_3$ ):  $\delta$  145.3, 143.0, 141.3, 140.3, 140.1,

138.5, 135.0, 132.8, 132.7, 131.6, 131.1, 130.9, 130.1, 130.0, 129.0, 128.3, 128.1, 128.0, 127.8, 127.4, 127.0, 126.9, 126.7, 126.1, 125.5, 125.1, 125.1, 124.6, 122.9, 34.5; IR (KBr): 2925, 1444, 1326, 1162, 1122, 1073, 904, 768, 731, 697  $\text{cm}^{-1}$ ; MS (EI):  $m/z$  540 ( $\text{M}^+$ ); HRMS (EI):  $m/z$  calcd for  $\text{C}_{38}\text{H}_{27}\text{F}_3$  ( $\text{M}^+$ ): 540.2065, found: 540.2061.

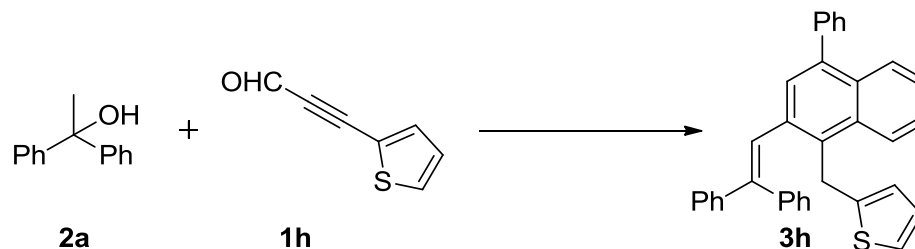

**2-((2-(2,2-Diphenylvinyl)-4-phenylnaphthalen-1-yl)methyl)thiophene (3h):** 138 mg, 79% yield, semisolid;  $R_f$  = 0.3 (hexanes);  $^1\text{H}$  NMR (400 MHz,  $\text{CDCl}_3$ ):  $\delta$  8.00 (d,  $J$  = 8.4 Hz, 1H), 7.74 (dd,  $J$  = 9.8, 4.5 Hz, 1H), 7.47–7.35 (m, 2H), 7.34–7.11 (m, 12H), 7.05–6.97 (m, 3H), 6.97–6.89 (m, 2H), 6.85 (d,  $J$  = 6.5 Hz, 1H), 6.80–6.72 (m, 1H), 6.51–6.39 (m, 1H), 4.61 (s, 2H);  $^{13}\text{C}$  NMR (100 MHz,  $\text{CDCl}_3$ ):  $\delta$  145.4, 145.1, 143.0, 140.2, 140.0, 138.6, 132.6, 132.3, 131.1, 131.0, 130.0, 129.6, 128.3, 128.2, 127.9, 127.8, 127.4, 127.0, 126.7, 126.6, 126.1, 125.6, 125.2, 124.3, 29.7; IR (KBr): 2923, 1492, 1444, 1260, 1075, 1027, 795, 768, 731, 698  $\text{cm}^{-1}$ ; MS (EI):  $m/z$  478 ( $\text{M}^+$ ); HRMS (EI):  $m/z$  calcd for  $\text{C}_{35}\text{H}_{26}\text{S}$  ( $\text{M}^+$ ): 478.1755, found: 478.1742.

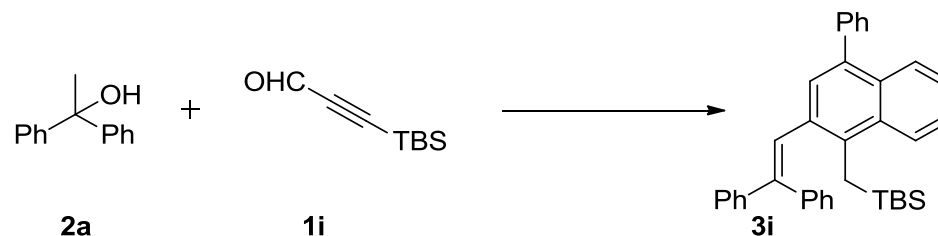

**tert-Butyl((2-(2,2-diphenylvinyl)-4-phenylnaphthalen-1-yl)methyl)dimethylsilane (3i):** 136 mg, 90% yield, white solid;  $R_f$  = 0.6 (hexanes: EtOAc = 95:5); mp 190–192  $^\circ\text{C}$ ;  $^1\text{H}$  NMR (500 MHz,  $\text{CDCl}_3$ ):  $\delta$  8.14 (d,  $J$  = 8.4 Hz, 1H), 7.89 (d,  $J$  = 8.4 Hz, 1H), 7.53 (dd,  $J$  = 8.5, 6.0 Hz,



6H), 7.50–7.35 (m, 6H), 7.24 (s, 1H), 7.17–7.07 (m, 3H), 7.04 (dd,  $J = 6.4, 5.2$  Hz, 3H), 2.50 (d,  $J = 13.4$  Hz, 1H), 1.76 (t,  $J = 18.6$  Hz, 1H), 0.95 (s, 9H), 0.00 (s, 6H);  $^{13}\text{C}$  NMR (75 MHz,  $\text{CDCl}_3$ ):  $\delta$  144.7, 143.2, 140.9, 140.2, 138.8, 135.3, 133.4, 130.9, 130.1, 129.9, 129.7, 129.3, 128.3, 128.2, 128.2, 127.7, 127.6, 127.1, 127.0, 126.9, 126.2, 125.7, 125.6, 124.3, 26.5, 20.2, 16.9, -5.6, -5.8; IR (KBr): 2951, 1491, 1442, 1249, 1153, 905, 824, 767, 730, 695  $\text{cm}^{-1}$ ; MS (EI):  $m/z$  510 ( $\text{M}^+$ ); HRMS (EI):  $m/z$  calcd for  $\text{C}_{37}\text{H}_{38}\text{Si}$  ( $\text{M}^+$ ): 510.2743, found: 510.2735.

Propargylic alcohols (**4a**, **4b**, **4c**, **4d**, **4f**, **4g**)<sup>3a</sup> (**4e**, **4j**, **4l**)<sup>3b</sup> **4h**,<sup>3e</sup> **4i**,<sup>3d</sup> **4k**,<sup>3e</sup> **4m**<sup>3f</sup> have been prepared using the literature procedure<sup>3</sup> and the spectral data compared.

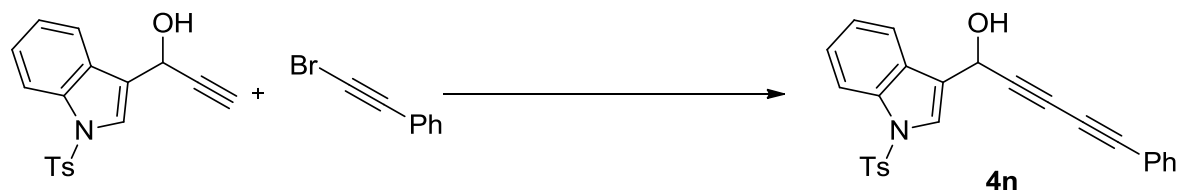

**5-Phenyl-1-(1-tosyl-1H-indol-3-yl)penta-2,4-diyne-1-ol (4n):** To a stirred solution of 1-(1-tosyl-1H-indol-3-yl) prop-2-yn-1-ol<sup>4</sup> (1 g, 3.08 mmol) in dry toluene (15 mL) were added CuCl (15 mol%, 45 mg),  $\text{NH}_2\text{OH}\cdot\text{HCl}$  (30 mol%, 63 mg),  $n\text{-BuNH}_2$  (4.62 mmol, 0.46 mL) and (bromoethynyl)benzene<sup>5</sup> (4.62 mmol, 0.84 g) at 0 °C, then the solution was warmed to room temperature and stirred for 2 h. The reaction mixture was quenched with 3 N HCl and extracted with EtOAc. Combined organic extracts were washed with brine, dried over  $\text{Na}_2\text{SO}_4$ , concentrated and purified by flash Column chromatography on silica gel (EtOAc: hexanes) to afford **4n**, 1.11 g, 85% yield, pale yellow solid;  $R_f = 0.4$  (hexanes: EtOAc = 7:3); mp 72–74 °C (EtOAc/hexanes);  $^1\text{H}$  NMR (500 MHz,  $\text{CDCl}_3$ ):  $\delta$  7.98 (d,  $J = 8.3$  Hz, 1H), 7.80 (d,  $J = 8.4$  Hz, 2H), 7.77–7.72 (m, 2H), 7.54–7.49 (m, 2H), 7.40–7.36 (m, 1H), 7.36–7.31 (m, 3H), 7.29–7.26 (m, 1H), 7.23 (d,  $J = 8.1$  Hz, 2H), 5.80 (s, 1H), 2.34 (s, 3H);  $^{13}\text{C}$  NMR (75 MHz,  $\text{CDCl}_3$ ):  $\delta$  145.1, 135.4, 135.0, 132.5, 129.9, 129.4, 128.4, 128.1, 126.8, 125.1, 124.1, 123.4, 121.4, 121.1, 120.3, 113.6, 80.3, 79.5, 73.0, 70.6, 58.4, 21.5; IR (KBr): 3058, 2234, 1600, 1444, 1368, 1171, 1122, 974, 751, 672  $\text{cm}^{-1}$ ; MS (ESI):  $m/z$  448 ( $\text{M}+\text{Na}^+$ ); HRMS (ESI):  $m/z$  calcd for  $\text{C}_{26}\text{H}_{19}\text{NNaO}_3\text{S}$  ( $\text{M}+\text{Na}^+$ ): 448.0978, found: 448.0990.

**General procedure for the preparation of Naphthalenes (3j-3y, 5a):** To a stirred solution of propargylic alcohol **1** (1.0 mmol) and 1, 1-diarylethan-1-ol **2** (1.0 mmol) in 5 mL of acetonitrile was added *p*TSA (5 mol%) at room temperature and stirred for 10 to 45 min, after completion of starting material, DBU (1.0 mmol) was added to the reaction mixture and stirred at 80 °C for 10-60 min. The solvent was evaporated under reduced pressure. The residue was purified by column chromatography on silica gel (EtOAc:hexanes) to afford the corresponding naphthalenes.

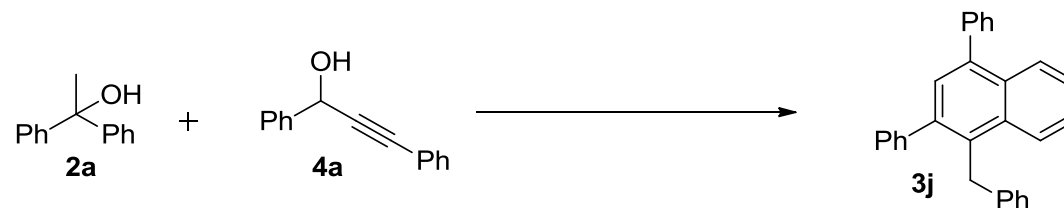

**1-Benzyl-2,4-diphenyl naphthalene (3j):** 81 mg, 92% yield, white solid;  $R_f = 0.5$  (hexanes) mp 117-119 °C;  $^1\text{H NMR}$  (400 MHz,  $\text{CDCl}_3$ ):  $\delta$  8.01–7.93 (m, 2H), 7.56 (dt,  $J = 8.0, 1.8$  Hz, 2H), 7.53–7.46 (m, 2H), 7.46–7.43 (m, 2H), 7.41 (ddd,  $J = 6.1, 3.2, 1.7$  Hz, 2H), 7.39–7.28 (m, 5H), 7.27–7.20 (m, 2H), 7.15 (dd,  $J = 8.5, 6.1$  Hz, 1H), 7.12–7.05 (m, 2H), 4.50 (s, 2H);  $^{13}\text{C NMR}$  (100 MHz,  $\text{CDCl}_3$ ):  $\delta$  142.2, 141.8, 140.7, 140.0, 139.2, 133.1, 131.9, 131.5, 130.3, 129.6, 129.3, 128.4, 128.3, 128.2, 128.1, 127.3, 127.1, 126.7, 126.3, 125.9, 125.7, 125.6, 35.6; IR (KBr): 3023, 1694, 1594, 1498, 1445, 1214, 745, 668  $\text{cm}^{-1}$ ; MS (EI):  $m/z$  370 ( $\text{M}^+$ ); HRMS (EI):  $m/z$  calcd for  $\text{C}_{29}\text{H}_{22}$  ( $\text{M}^+$ ): 370.1722, found: 370.1710.

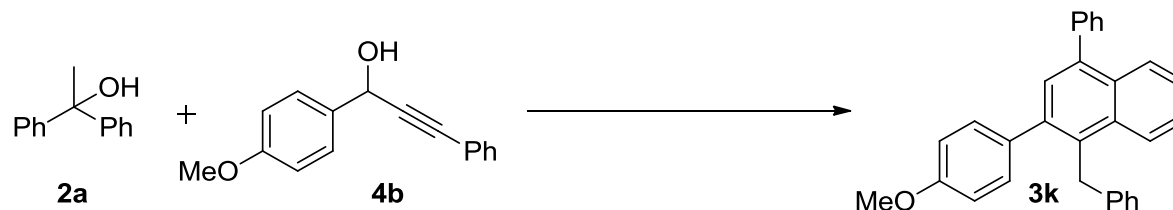

**1-Benzyl-2-(4-methoxyphenyl)-4-phenyl naphthalene (3k):** 75 mg, 90% yield, white solid;  $R_f = 0.5$  (hexanes) mp 80-83 °C;  $^1\text{H NMR}$  (500 MHz,  $\text{CDCl}_3$ ):  $\delta$  7.92–7.84 (m, 2H), 7.51–7.45 (m, 2H), 7.42 (dd,  $J = 10.2, 4.7$  Hz, 2H), 7.38–7.29 (m, 4H), 7.21 (dd,  $J = 9.1, 2.4$  Hz, 2H), 7.18–

7.13 (m, 2H), 7.08 (t,  $J = 7.3$  Hz, 1H), 7.02 (d,  $J = 7.3$  Hz, 2H), 6.84–6.77 (m, 2H), 4.43 (s, 2H), 3.74 (s, 3H);  $^{13}\text{C}$  NMR (125 MHz,  $\text{CDCl}_3$ ):  $\delta$  158.8, 141.9, 140.7, 139.6, 139.1, 134.6, 133.1, 131.8, 131.3, 130.4, 130.3, 129.8, 128.4, 128.3, 128.2, 127.3, 126.6, 126.2, 125.9, 125.7, 125.4, 113.6, 55.3, 35.7; IR (KBr): 3027, 2927, 2854, 1512, 1247, 1177, 1035, 773, 731, 700  $\text{cm}^{-1}$ ; MS (EI):  $m/z$  400 ( $\text{M}^+$ ); HRMS (EI):  $m/z$  calcd for  $\text{C}_{30}\text{H}_{24}\text{O}$  ( $\text{M}^+$ ): 400.1827, found: 400.1820.

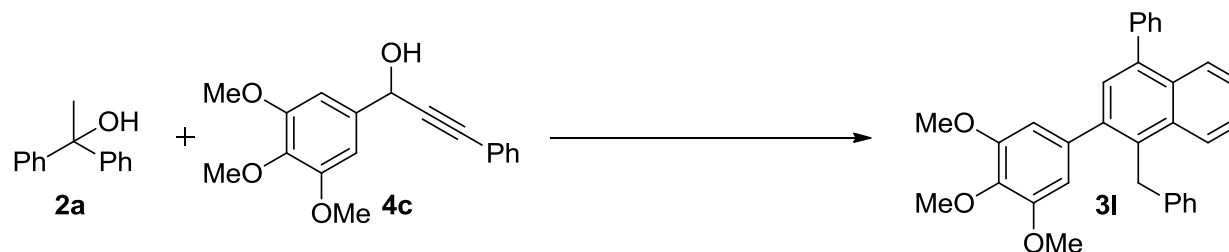

**1-Benzyl-4-phenyl-2-(3,4,5-trimethoxy phenyl) naphthalene (3l)**: 61 mg, 80% yield, light pink solid;  $R_f = 0.5$  (hexanes: EtOAc = 9:1) mp 161–163  $^{\circ}\text{C}$ ;  $^1\text{H}$  NMR (500 MHz,  $\text{CDCl}_3$ ):  $\delta$  8.03–7.96 (m, 2H), 7.62–7.55 (m, 2H), 7.55–7.39 (m, 6H), 7.25 (dd,  $J = 9.3, 5.8$  Hz, 2H), 7.16 (t,  $J = 7.3$  Hz, 1H), 7.11 (d,  $J = 7.4$  Hz, 2H), 6.53 (s, 2H), 4.51 (s, 2H), 3.86 (s, 3H), 3.57 (s, 6H);  $^{13}\text{C}$  NMR (125 MHz,  $\text{CDCl}_3$ ):  $\delta$  152.7, 142.0, 140.6, 139.9, 139.2, 137.5, 136.9, 133.4, 131.6, 131.3, 130.2, 129.1, 128.4, 128.3, 128.2, 127.3, 126.6, 126.4, 125.8, 125.7, 125.6, 106.3, 60.9, 55.7, 35.8; IR (KBr): 2922, 1594, 1495, 1446, 1375, 1219, 892, 758, 704  $\text{cm}^{-1}$ ; MS (EI):  $m/z$  460 ( $\text{M}^+$ ); HRMS (EI):  $m/z$  calcd for  $\text{C}_{32}\text{H}_{28}\text{O}_3$  ( $\text{M}^+$ ): 460.2038, found: 460.2030.

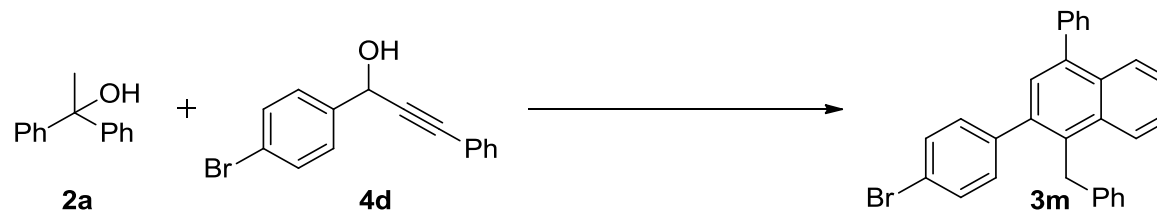

**13) 1-Benzyl-2-(4-bromophenyl)-4-phenylnaphthalene (3m)**: 71 mg, 92% yield, white solid;  $R_f = 0.5$  (hexanes) mp 151–153  $^{\circ}\text{C}$ ;  $^1\text{H}$  NMR (500 MHz,  $\text{CDCl}_3$ ):  $\delta$  7.99–7.93 (m, 2H), 7.57–7.53 (m, 2H), 7.52–7.37 (m, 8H), 7.26–7.21 (m, 4H), 7.16 (t,  $J = 7.3$  Hz, 1H), 7.06 (d,  $J = 7.1$

Hz, 2H), 4.46 (s, 2H);  $^{13}\text{C}$  NMR (125 MHz,  $\text{CDCl}_3$ ):  $\delta$  141.4, 141.0, 140.4, 139.4, 138.6, 133.0, 131.9, 131.5, 131.2, 131.0, 130.2, 129.0, 128.5, 128.3, 128.1, 127.4, 126.7, 126.4, 125.8, 125.7, 121.4, 35.5; IR (KBr): 3027, 1597, 1489, 1448, 1379, 1072, 1009, 953, 832, 758, 701  $\text{cm}^{-1}$ ; MS (EI):  $m/z$  448 ( $\text{M}^+$ ); HRMS (EI):  $m/z$  calcd for  $\text{C}_{29}\text{H}_{21}\text{Br}$  ( $\text{M}^+$ ): 448.0826, found: 448.0819.

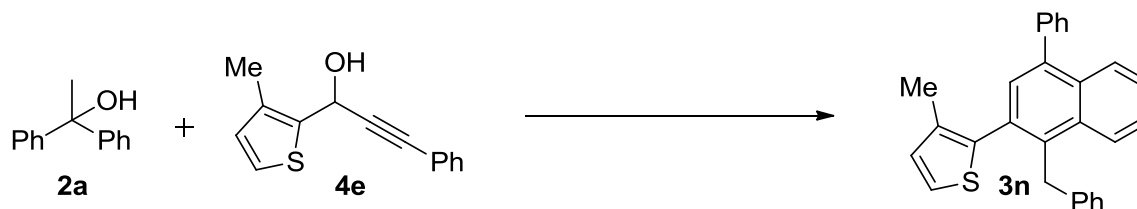

**14) 2-(1-Benzyl-4-phenylnaphthalen-2-yl)-3-methyl thiophene (3n):** 66 mg, 87% yield, white solid;  $R_f = 0.5$  (hexanes) mp 64-66  $^{\circ}\text{C}$ ;  $^1\text{H}$  NMR (400 MHz,  $\text{CDCl}_3$ ):  $\delta$  8.07–7.93 (m, 2H), 7.53 (t,  $J = 7.7$  Hz, 2H), 7.48 (dd,  $J = 14.2, 6.6$  Hz, 2H), 7.42 (dd,  $J = 6.3, 2.1$  Hz, 4H), 7.23–7.15 (m, 3H), 7.10 (dd,  $J = 14.3, 7.0$  Hz, 1H), 7.05 (d,  $J = 7.3$  Hz, 2H), 6.88 (d,  $J = 5.1$  Hz, 1H), 4.50 (s, 2H), 2.00 (s, 3H);  $^{13}\text{C}$  NMR (100 MHz,  $\text{CDCl}_3$ ):  $\delta$  141.2, 140.4, 138.9, 137.0, 135.4, 135.0, 132.9, 132.0, 131.9, 130.3, 130.2, 129.4, 128.2, 127.3, 126.7, 126.2, 126.0, 125.9, 125.7, 123.9, 35.5, 14.3; IR (KBr): 2923, 1596, 1494, 1448, 1376, 1032, 936, 893, 763, 704  $\text{cm}^{-1}$ ; MS (EI):  $m/z$  390 ( $\text{M}^+$ ); HRMS (EI):  $m/z$  calcd for  $\text{C}_{28}\text{H}_{22}\text{S}$  ( $\text{M}^+$ ): 390.1442, found: 390.1440.

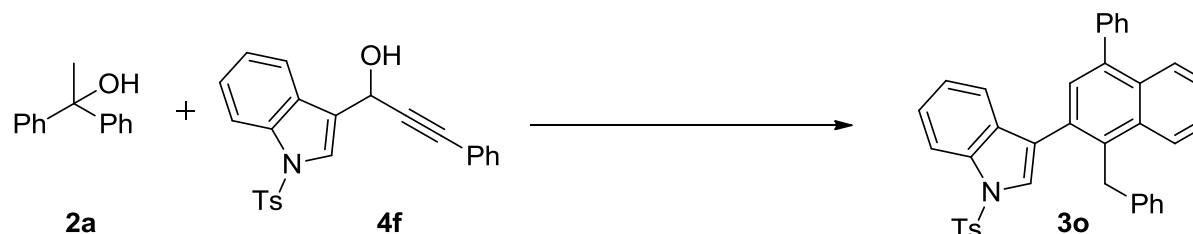

**3-(1-Benzyl-4-phenylnaphthalen-2-yl)-1-tosyl-1H-indole (3o):** 63 mg, 90% yield, white solid;  $R_f = 0.5$  (hexanes: EtOAc = 20:1) mp 186-188  $^{\circ}\text{C}$ ;  $^1\text{H}$  NMR (500 MHz,  $\text{CDCl}_3$ ):  $\delta$  8.04 (d,  $J = 8.3$  Hz, 1H), 7.99 (qd,  $J = 6.1, 3.1$  Hz, 2H), 7.59 (d,  $J = 8.3$  Hz, 2H), 7.57–7.52 (m, 2H), 7.52–7.40 (m, 7H), 7.39–7.31 (m, 2H), 7.29–7.23 (m, 2H), 7.20 (q,  $J = 7.2$  Hz, 2H), 7.10 (d,  $J = 8.2$  Hz, 2H), 7.03 (d,  $J = 7.4$  Hz, 2H), 4.39 (s, 2H),

2.32 (s, 3H);  $^{13}\text{C}$  NMR (100 MHz,  $\text{CDCl}_3$ ):  $\delta$  144.8, 141.3, 140.4, 139.4, 135.0, 134.9, 134.0, 133.2, 131.8, 131.1, 130.2, 130.1, 129.8, 129.3, 128.5, 128.3, 128.0, 127.4, 126.8, 126.7, 126.4, 126.0, 125.9, 125.8, 124.9, 124.3, 123.6, 123.4, 120.5, 113.8, 35.7, 21.6; IR (KBr): 3061, 3027, 2924, 1599, 1446, 1373, 1174, 1128, 977, 752, 684  $\text{cm}^{-1}$ ; MS (EI):  $m/z$  563 ( $\text{M}^+$ ); HRMS (EI):  $m/z$  calcd for  $\text{C}_{38}\text{H}_{29}\text{NO}_2\text{S}$  ( $\text{M}^+$ ): 563.1919, found: 563.1913.

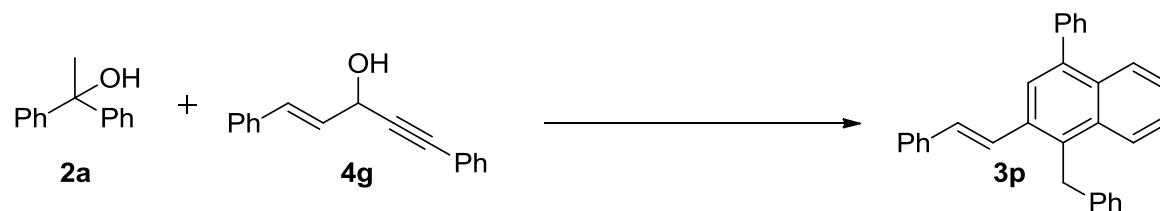

**(E)-1-Benzyl-4-phenyl-2-styrylnaphthalene (3p):** 59 mg, 78% yield, colorless liquid;  $R_f$  = 0.6 (hexanes);  $^1\text{H}$  NMR (300 MHz,  $\text{CDCl}_3$ ):  $\delta$  8.08 (d,  $J$  = 7.9 Hz, 1H), 7.90 (d,  $J$  = 8.0 Hz, 1H), 7.81 (s, 1H), 7.60 (dd,  $J$  = 22.5, 5 Hz, 5H), 7.54–7.32 (m, 9H), 7.27–7.14 (m, 5H), 4.71 (s, 2H);  $^{13}\text{C}$  NMR (100 MHz,  $\text{CDCl}_3$ ):  $\delta$  140.9, 140.5, 139.5, 137.5, 133.5, 133.3, 132.7, 131.8, 131.7, 130.2, 128.7, 128.6, 128.3, 128.2, 127.7, 127.3, 126.8, 126.7, 126.6, 126.4, 126.1, 125.5, 125.1, 125.1, 34.1; IR (KBr): 2925, 1729, 1596, 1496, 1450, 1216, 1029, 963, 755, 701  $\text{cm}^{-1}$ ; MS (EI):  $m/z$  396 ( $\text{M}^+$ ); HRMS (ESI):  $m/z$  calcd for  $\text{C}_{31}\text{H}_{24}$  ( $\text{M}^+$ ): 396.1878, found: 396.1863.

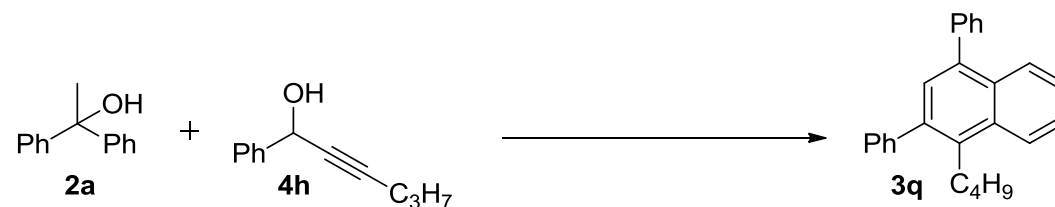

**2,4-Diphenyl-1-propyl naphthalene (3q):** 81 mg, 88% yield, Colorless liquid;  $R_f$  = 0.6 (hexanes);  $^1\text{H}$  NMR (500 MHz,  $\text{CDCl}_3$ ):  $\delta$  8.17 (d,  $J$  = 8.5 Hz, 1H), 7.97 (d,  $J$  = 8.4 Hz, 1H), 7.56 (ddd,  $J$  = 8.3, 6.8, 1.2 Hz, 1H), 7.53–7.49 (m, 2H), 7.49–7.34 (m, 7H), 7.32 (s, 1H), 3.13–2.96 (m,

2H), 1.75–1.61 (m, 2H), 1.42–1.30 (m, 2H), 0.85 (t,  $J = 7.4$  Hz, 3H);  $^{13}\text{C}$  NMR (100 MHz,  $\text{CDCl}_3$ ):  $\delta$  142.7, 140.7, 138.6, 137.9, 135.6, 132.3, 131.3, 130.2, 129.5, 128.2, 128.0, 127.1, 126.8, 126.8, 126.0, 125.4, 124.9, 33.7, 29.2, 23.1, 13.8; IR (KBr): 3058, 2956, 2925, 2855, 1493, 1219, 1033, 896, 770, 701  $\text{cm}^{-1}$ ; MS (EI):  $m/z$  322 ( $\text{M}^+$ ); HRMS (EI):  $m/z$  calcd for  $\text{C}_{25}\text{H}_{22}$  ( $\text{M}^+$ ): 322.1722, found: 322.1717.

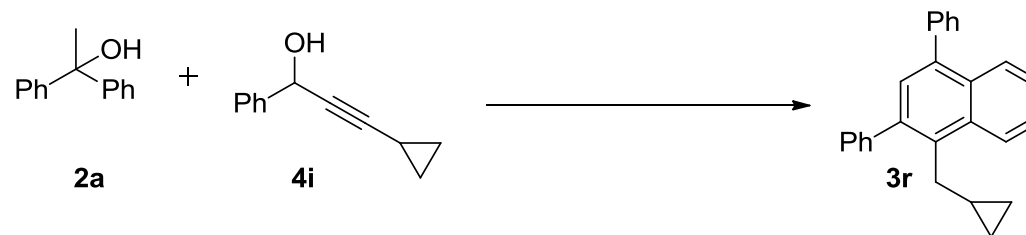

**1-(Cyclopropylmethyl)-2,4-diphenyl naphthalene (3r):** 85 mg, 88% yield, white solid;  $R_f = 0.6$  (hexanes) mp 111–113  $^{\circ}\text{C}$ ;  $^1\text{H}$  NMR (500 MHz,  $\text{CDCl}_3$ ):  $\delta$  8.32 (d,  $J = 8.5$  Hz, 1H), 7.98 (d,  $J = 8.4$  Hz, 1H), 7.61–7.55 (m, 1H), 7.55–7.50 (m, 2H), 7.46 (t,  $J = 7.6$  Hz, 3H), 7.44–7.32 (m, 7H), 3.05 (d,  $J = 6.1$  Hz, 2H), 1.13–0.93 (m, 1H), 0.43–0.34 (m, 2H), 0.05–0.02 (m, 2H);  $^{13}\text{C}$  NMR (100 MHz,  $\text{CDCl}_3$ ):  $\delta$  142.8, 140.7, 138.8, 138.1, 134.9, 132.6, 131.4, 130.2, 129.9, 129.5, 128.2, 127.9, 127.1, 126.8, 126.7, 125.9, 125.4, 125.4, 33.2, 12.1, 5.5; IR (KBr): 3075, 3024, 2868, 1592, 1493, 1218, 1016, 827, 760, 702  $\text{cm}^{-1}$ ; MS (EI):  $m/z$  334 ( $\text{M}^+$ ); HRMS (EI):  $m/z$  calcd for  $\text{C}_{26}\text{H}_{22}$  ( $\text{M}^+$ ): 334.1722, found: 334.1719.

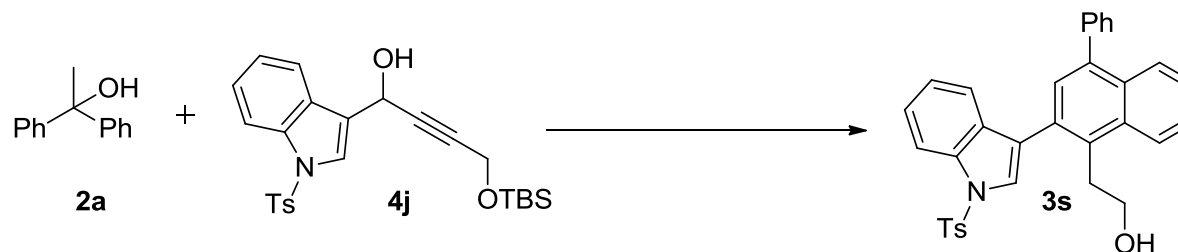

**2-(4-Phenyl-2-(1-tosyl-1H-indol-3-yl)naphthalen-1-yl)ethan-1-ol (3s):** 49 mg, 90% yield, pale yellow solid;  $R_f = 0.5$  (hexanes: EtOAc = 4:1) mp 102–105  $^{\circ}\text{C}$ ;  $^1\text{H}$  NMR (300 MHz,  $\text{CDCl}_3$ ):  $\delta$  8.14 (d,  $J = 8.5$  Hz, 1H), 7.99 (d,  $J = 8.3$  Hz, 1H), 7.89 (d,  $J = 8.4$  Hz, 1H), 7.75 (d,  $J =$



7.8, 2.5 Hz, 2H), 7.17–7.13 (m, 1H), 7.09 (s, 2H), 4.46 (d,  $J = 3.2$  Hz, 2H), 2.45 (d,  $J = 2.6$  Hz, 3H), 2.41 (d,  $J = 2.8$  Hz, 3H).  $^{13}\text{C}$  NMR (125 MHz,  $\text{CDCl}_3$ ):  $\delta$  142.3, 141.8, 140.0, 138.8, 137.8, 136.8, 135.7, 133.2, 130.9, 130.0, 129.6, 129.3, 128.9, 128.6, 128.3, 128.1, 127.9, 127.6, 126.9, 126.5, 125.5, 124.8, 35.4, 21.2, 21.2; IR (KBr): 3024, 1599, 1493, 1450, 1216, 1029, 824, 755, 700  $\text{cm}^{-1}$ ; MS (EI):  $m/z$  396 ( $\text{M}^+$ ); HRMS (EI):  $m/z$  calcd for  $\text{C}_{31}\text{H}_{26}$  ( $\text{M}^+$ ): 396.2034, found: 396.2030.

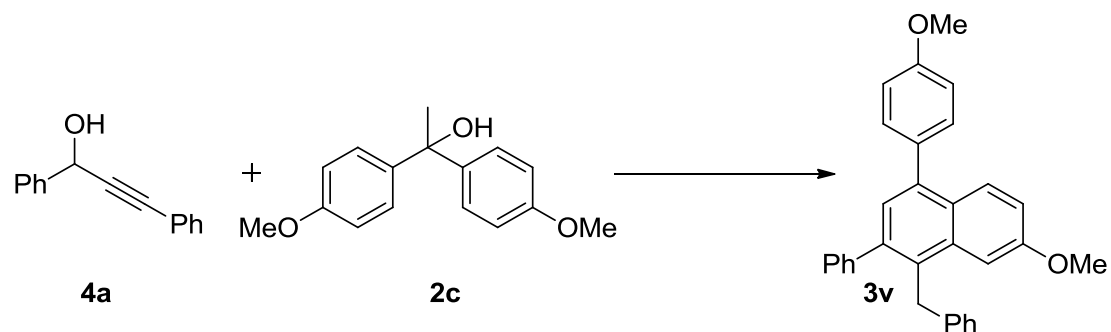

**1-Benzyl-7-methoxy-4-(4-methoxyphenyl)-2-phenylnaphthalene (3v):** 70 mg, 85% yield, white solid;  $R_f = 0.2$  (hexanes) mp 113-115  $^{\circ}\text{C}$ ;  $^1\text{H}$  NMR (400 MHz,  $\text{CDCl}_3$ ):  $\delta$  7.81 (d,  $J = 9.2$  Hz, 1H), 7.41–7.36 (m, 2H), 7.34–7.23 (m, 6H), 7.22 (d,  $J = 5.2$  Hz, 1H), 7.14 (d,  $J = 8.1$  Hz, 2H), 7.06 (dd,  $J = 11.8, 7.1$  Hz, 3H), 7.00–6.91 (m, 3H), 4.36 (s, 2H), 3.81 (s, 3H), 3.59 (s, 3H);  $^{13}\text{C}$  NMR (100 MHz,  $\text{CDCl}_3$ ):  $\delta$  158.9, 157.6, 142.5, 141.7, 140.6, 138.6, 134.3, 133.1, 131.2, 130.4, 129.3, 129.0, 128.6, 128.4, 128.3, 128.2, 128.1, 127.3, 127.0, 125.7, 117.6, 113.7, 104.9, 55.4, 55.1, 36.0; IR (KBr): 2926, 1614, 1515, 1452, 1245, 1227, 1177, 1035, 832, 701  $\text{cm}^{-1}$ ; MS (EI):  $m/z$  430 ( $\text{M}^+$ ); HRMS (EI):  $m/z$  calcd for  $\text{C}_{31}\text{H}_{26}\text{O}_2$  ( $\text{M}^+$ ): 430.1932, found: 430.1930.



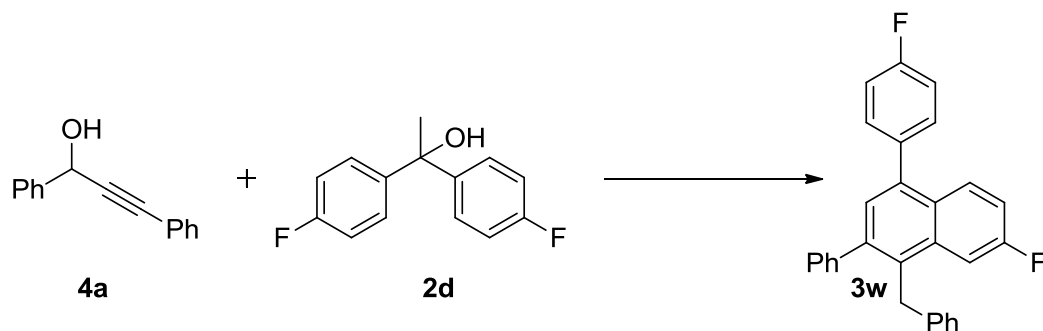

**1-Benzyl-7-fluoro-4-(4-fluorophenyl)-2-phenylnaphthalene (3w):** 79 mg, 92% yield, white solid;  $R_f = 0.2$  (hexanes) mp 96-98 °C;  $^1\text{H NMR}$  (400 MHz,  $\text{CDCl}_3$ ):  $\delta$  7.89 (dd,  $J = 9.3, 6.0$  Hz, 1H), 7.56 (dd,  $J = 11.5, 2.5$  Hz, 1H), 7.51–7.47 (m, 2H), 7.37–7.33 (m, 6H), 7.26–7.22 (m, 2H), 7.21–7.15 (m, 4H), 7.06 (d,  $J = 7.1$  Hz, 2H), 4.42 (s, 2H);  $^{13}\text{C NMR}$  (125 MHz,  $\text{CDCl}_3$ ):  $\delta$  163.4, 161.9, 161.4, 160.0, 141.7, 141.0, 138.1, 136.3, 134.4, 131.6, 129.2, 128.9, 128.5, 128.2, 128.1, 127.3, 125.9, 115.8, 115.4, 115.2, 109.7, 109.5, 35.7; IR (KBr): 3027, 1623, 1604, 1517, 1450, 1419, 1223, 1203, 1157, 838, 768, 703  $\text{cm}^{-1}$ ; MS (EI):  $m/z$  406 ( $\text{M}^+$ ); HRMS (EI):  $m/z$  calcd for  $\text{C}_{29}\text{H}_{20}\text{F}_2$  ( $\text{M}^+$ ): 406.1533, found: 406.1522.

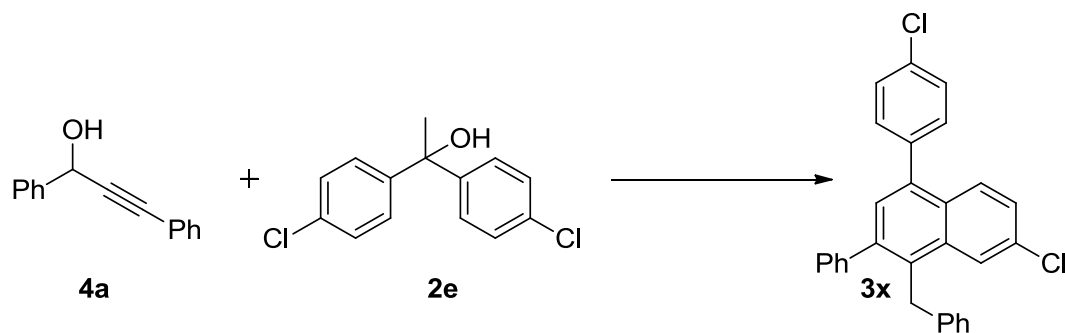

**1-Benzyl-7-chloro-4-(4-chlorophenyl)-2-phenylnaphthalene (3x):** 78 mg, 95% yield, pale yellow solid;  $R_f = 0.6$  (hexanes: EtOAc = 95:5) mp 161-163 °C;  $^1\text{H NMR}$  (400 MHz,  $\text{CDCl}_3$ ):  $\delta$  7.95 (d,  $J = 1.9$  Hz, 1H), 7.83 (d,  $J = 9.0$  Hz, 1H), 7.46 (d,  $J = 1.6$  Hz, 3H), 7.40 (s, 1H), 7.37–7.30 (m, 6H), 7.24 (dd,  $J = 9.7, 4.9$  Hz, 3H), 7.17 (t,  $J = 7.3$  Hz, 1H), 7.04 (d,  $J = 7.2$  Hz, 2H), 4.43 (s, 2H);  $^{13}\text{C NMR}$  (100 MHz,  $\text{CDCl}_3$ ):  $\delta$  141.6, 141.1, 141.0, 138.5, 137.8, 134.1, 133.7, 132.6, 131.8, 131.4, 129.8, 129.6, 129.2, 128.7, 128.6, 128.3, 128.2, 128.1, 127.4, 126.6, 126.0, 125.0,

35.5; IR (KBr): 3026, 1603, 1491, 1451, 1426, 1090, 899, 877, 838, 751, 700  $\text{cm}^{-1}$ ; MS (EI):  $m/z$  438 (M)<sup>+</sup>; HRMS (EI):  $m/z$  calcd for  $\text{C}_{29}\text{H}_{20}\text{Cl}_2$  (M)<sup>+</sup>: 438.0942, found: 438.0940.

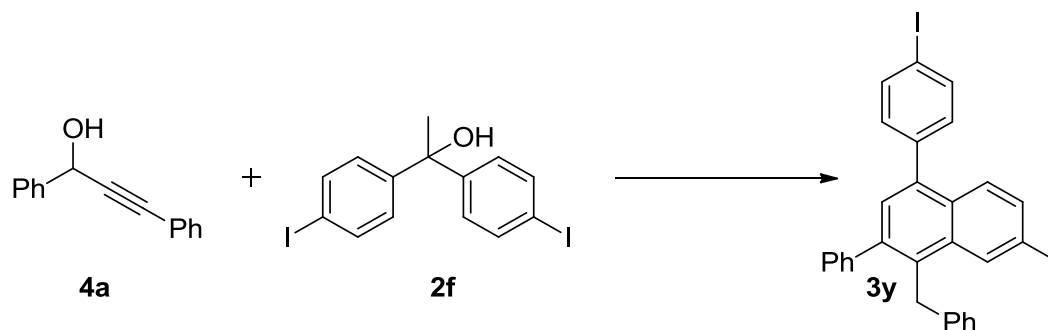

**1-Benzyl-7-iodo-4-(4-iodophenyl)-2-phenylnaphthalene (3y):** 61 mg, 88% yield, white solid;  $R_f = 0.8$  (petroleum ether : EtOAc = 95:5) mp 115-117 °C;  $^1\text{H}$  NMR (400 MHz,  $\text{CDCl}_3$ ):  $\delta$  8.29 (s, 1H), 7.75 (d,  $J = 8.3$  Hz, 1H), 7.55 (dd,  $J = 9.1, 5.0$  Hz, 2H), 7.33 (s, 1H), 7.26 (dd,  $J = 8.3, 4.3$  Hz, 5H), 7.15 (dt,  $J = 14.6, 4.9$  Hz, 6H), 6.96 (d,  $J = 7.0$  Hz, 2H), 4.35 (s, 2H);  $^{13}\text{C}$  NMR (100 MHz,  $\text{CDCl}_3$ ):  $\delta$  141.5, 141.0, 140.88, 139.5, 137.9, 137.5, 134.9, 134.8, 134.3, 132.0, 131.6, 129.9, 129.2, 128.5, 128.2, 128.2, 128.1, 127.9, 127.3, 125.9, 93.3, 92.9, 35.3; IR (KBr): 3024, 1596, 1491, 1450, 1207, 1005, 923, 853, 826, 756, 700  $\text{cm}^{-1}$ ; MS (EI):  $m/z$  621 (M)<sup>+</sup>; HRMS (EI):  $m/z$  calcd for  $\text{C}_{29}\text{H}_{20}\text{I}_2$  (M)<sup>+</sup>: 621.9654, found: 621.9649.

**General procedure for the mono cyclisation (3z, 5b, 5c):** To a stirred solution of 1,1 diarylethan-1-ol **2** (1.0 mmol) and bisacetylenic alcohols **4** (1.0 mmol) in 5 mL of acetonitrile was added *p*TSA (5 mol%) at room temperature and stirred for 10 min, after the completion of starting material DBU (1.0 mmol) was added to the reaction mixture at room temperature and was stirred at 80 °C for 30 min. After the completion of reaction (monitored by TLC), the reaction mixture was concentrated under reduced pressure. Purified by column chromatography on silica gel (EtOAc: hexanes) to afford corresponding polycyclic aromatic hydrocarbons.

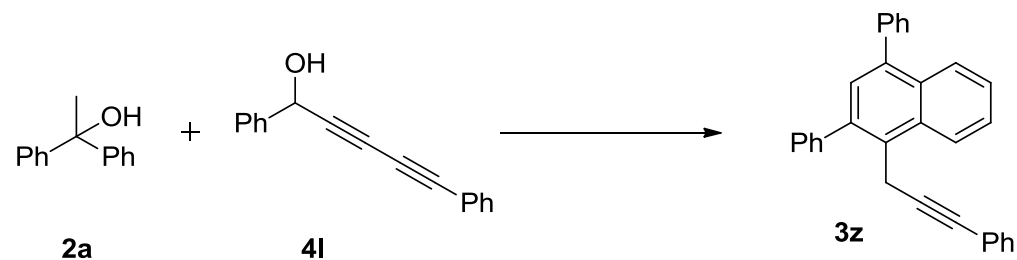

**2,4-Diphenyl-1-(3-phenylprop-2-yn-1-yl) naphthalene (3z):** 59 mg, 80% yield, light brown solid;  $R_f = 0.4$  (hexanes: EtOAc = 20:1) mp 86-88 °C;  $^1\text{H NMR}$  (500 MHz,  $\text{CDCl}_3$ ):  $\delta$  8.60 (d,  $J = 8.2$  Hz, 1H), 7.93 (d,  $J = 8.4$  Hz, 1H), 7.74–7.69 (m, 2H), 7.60 (ddd,  $J = 8.3, 6.8, 3.3$  Hz, 1H), 7.55–7.34 (m, 11H), 7.32–7.26 (m, 4H), 3.91 (s, 2H);  $^{13}\text{C NMR}$  (125 MHz,  $\text{CDCl}_3$ ):  $\delta$  141.9, 141.2, 140.3, 140.2, 136.6, 134.4, 130.5, 130.3, 130.0, 129.7, 128.6, 128.5, 128.3, 128.0, 128.0, 127.5, 127.3, 127.2, 126.8, 126.5, 126.2, 118.4, 96.0, 80.3, 26.2; IR (KBr): 2922, 1594, 1496, 1450, 1218, 1071, 1030, 909, 756, 699  $\text{cm}^{-1}$ ; MS (EI):  $m/z$  394 ( $\text{M}^+$ ); HRMS (ESI):  $m/z$  calcd for  $\text{C}_{31}\text{H}_{22}$  ( $\text{M}^+$ ): 394.1722, found: 394.1713.

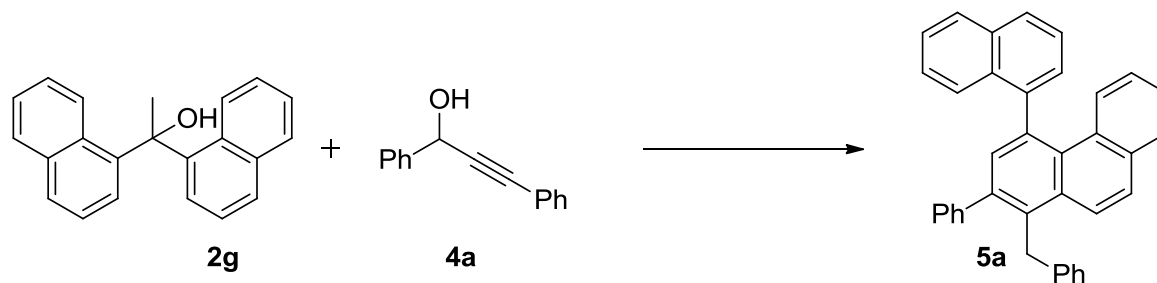

**1-Benzyl-4-(naphthalen-1-yl)-2-phenyl anthracene (5a):** 90 mg, 87% yield, pale yellow solid;  $R_f = 0.6$  (hexanes) mp 161-163 °C;  $^1\text{H NMR}$  (500 MHz,  $\text{CDCl}_3$ ):  $\delta$  7.93–7.85 (m, 3H), 7.67 (dd,  $J = 7.9, 1.3$  Hz, 1H), 7.63 (d,  $J = 9.2$  Hz, 1H), 7.56–7.46 (m, 5H), 7.39 (ddd,  $J = 8.1, 6.8, 1.1$  Hz, 1H), 7.33–7.28 (m, 2H), 7.27–7.20 (m, 6H), 7.17 (d,  $J = 1.3$  Hz, 1H), 7.12 (t,  $J = 7.3$  Hz, 1H), 7.07 (d,  $J = 7.1$  Hz, 2H), 6.79 (ddd,  $J = 8.6, 7.0, 1.5$  Hz, 1H), 4.55 (s, 2H);  $^{13}\text{C NMR}$  (125 MHz,  $\text{CDCl}_3$ ):  $\delta$  143.1, 141.8, 141.7, 140.7, 136.8, 134.0, 133.6, 132.8, 132.6, 132.0, 130.6,

129.6, 129.4, 128.5, 128.3, 128.2, 128.1, 128.1, 127.7, 127.6, 127.1, 126.8, 126.3, 126.3, 126.1, 126.0, 125.9, 125.8, 125.3, 124.4, 36.3; IR (KBr): 3021, 1591, 1497, 1446, 1394, 1256, 1214, 1024, 745  $\text{cm}^{-1}$ ; MS (EI):  $m/z$  470 ( $\text{M}^+$ ); HRMS (EI):  $m/z$  calcd for  $\text{C}_{37}\text{H}_{26}$  ( $\text{M}^+$ ): 470.2035, found: 470.2031.

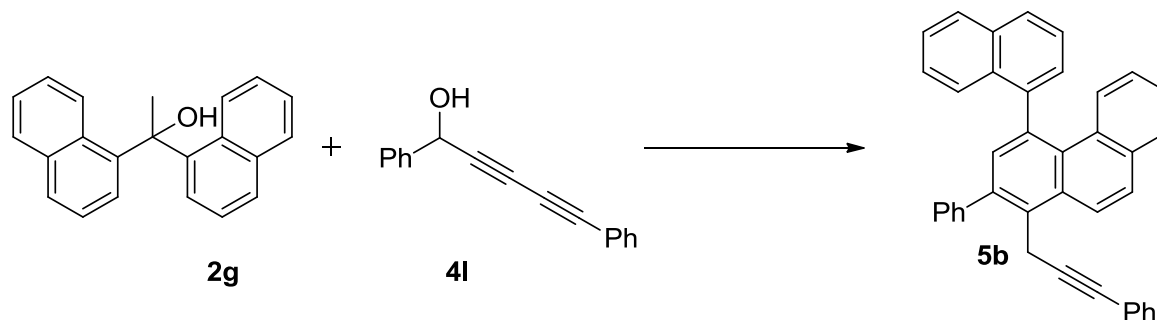

**4-(Naphthalen-1-yl)-2-phenyl-1-(3-phenylprop-2-yn-1-yl)phenanthrene (5b):** 71 mg, 86% yield, white solid;  $R_f = 0.6$  (hexanes) mp 146–148  $^{\circ}\text{C}$ ;  $^1\text{H}$  NMR (500 MHz,  $\text{CDCl}_3$ ):  $\delta$  8.69 (d,  $J = 9.1$  Hz, 1H), 7.96 (dd,  $J = 16.0, 8.2$  Hz, 2H), 7.87 (d,  $J = 9.1$  Hz, 1H), 7.82 (d,  $J = 7.5$  Hz, 1H), 7.72 (d,  $J = 6.7$  Hz, 2H), 7.59 (dd,  $J = 14.3, 6.2$  Hz, 2H), 7.52–7.42 (m, 5H), 7.40–7.32 (m, 5H), 7.31 (d,  $J = 4.4$  Hz, 3H), 7.25–7.20 (m, 1H), 6.87 (t,  $J = 7.3$  Hz, 1H), 3.95 (s, 2H);  $^{13}\text{C}$  NMR (125 MHz,  $\text{CDCl}_3$ ):  $\delta$  142.6, 141.9, 140.6, 138.0, 136.5, 134.4, 133.9, 133.0, 132.6, 131.7, 130.2, 129.7, 128.7, 128.7, 128.5, 128.3, 128.1, 128.0, 127.9, 127.8, 127.4, 127.3, 126.5, 126.3, 126.2, 126.1, 126.0, 125.7, 125.5, 119.6, 96.4, 80.7, 26.3; IR (KBr): 2924, 2185, 1596, 1454, 1267, 1083, 1017, 792, 753, 695  $\text{cm}^{-1}$ ; MS (EI):  $m/z$  494 ( $\text{M}^+$ ); HRMS (EI):  $m/z$  calcd for  $\text{C}_{39}\text{H}_{26}$  ( $\text{M}^+$ ): 494.2035, found: 494.2031.

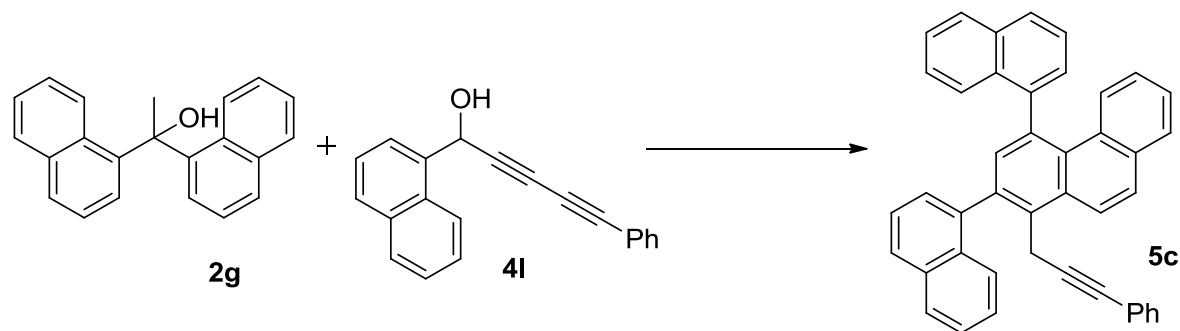

**2,4-Di(naphthalen-1-yl)-1-(3-phenylprop-2-yn-1-yl)phenanthrene (5c):** 77 mg, 85% yield, white solid;  $R_f = 0.2$  (hexanes) mp 102-104 °C;  $^1\text{H}$  NMR (400 MHz,  $\text{CDCl}_3$ ):  $\delta$  8.72–8.57 (m, 1H), 7.99–7.76 (m, 7H), 7.68–7.32 (m, 12H), 7.31–7.18 (m, 2H), 7.16–7.05 (m, 1H), 6.94–6.85 (m, 1H), 6.76 (t,  $J = 7.8$  Hz, 2H), 3.67 (d,  $J = 4.2$  Hz, 2H);  $^{13}\text{C}$  NMR (100 MHz,  $\text{CDCl}_3$ ):  $\delta$  142.5, 142.4, 141.2, 141.0, 139.0, 137.7, 137.5, 136.2, 134.0, 133.9, 133.8, 133.6, 133.5, 133.1, 131.9, 131.8, 131.7, 130.3, 128.8, 128.3, 128.2, 128.1, 127.8, 127.5, 127.4, 126.6, 126.5, 126.4, 126.3, 126.1, 126.0, 125.9, 125.6, 125.5, 125.2, 121.8, 96.7, 80.5, 25.9; IR (KBr): 2924, 2188, 1596, 1454, 1390, 1280, 1169, 1007, 800, 779, 754, 697  $\text{cm}^{-1}$ ; MS (EI):  $m/z$  544 ( $\text{M}^+$ ); HRMS (EI):  $m/z$  calcd for  $\text{C}_{43}\text{H}_{28}$  ( $\text{M}^+$ ): 544.2191, found: 544.2199.

**General procedure for the di cyclisation (6a-6d):** To a stirred solution of 1,1 diarylethan-1-ol **2** (1.0 mmol) and bisacetylenic alcohol **4** (1.0 mmol) in 5 mL of acetonitrile was added *p*TSA (5 mol%) at room temperature and stirred for 10 min, after the completion of starting material DBU (1.0 mmol) was added to the reaction mixture at room temperature and stirred at 80 °C for 12 h. After the completion of reaction (monitored by TLC), the reaction mixture was concentrated under reduced pressure. Purified by column chromatography on silica gel (EtOAc: hexanes) to afford corresponding polycyclic aromatic hydrocarbons.

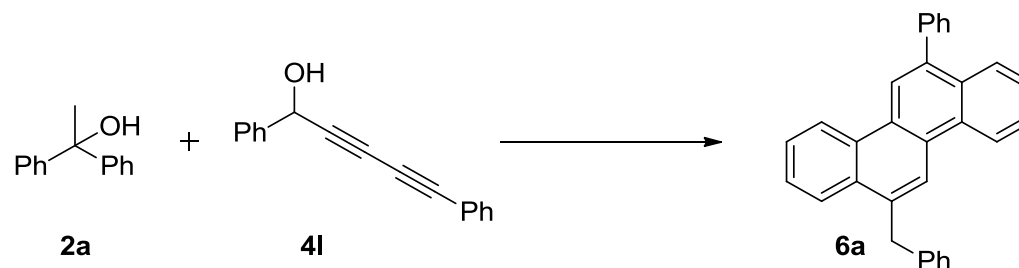

**6-Benzyl-12-phenyl chrysene (6a):** 59 mg, 70% yield, light brown solid;  $R_f = 0.4$  (hexanes: EtOAc = 20:1) mp 196-198 °C;  $^1\text{H}$  NMR (500 MHz,  $\text{CDCl}_3$ ):  $\delta$  8.79 (dd,  $J = 19.4, 8.4$  Hz, 2H), 8.63 (d,  $J = 16.2$  Hz, 2H), 8.14 (t,  $J = 7.8$  Hz, 1H), 8.01 (d,  $J = 8.3$  Hz, 1H), 7.71–7.61 (m, 4H), 7.60–7.54 (m, 4H), 7.51 (ddd,  $J = 6.9, 4.0, 2.2$  Hz, 2H), 7.46 (d,  $J = 4.3$  Hz, 1H), 7.30 (d,  $J = 4.4$  Hz, 3H), 4.68 (s, 2H);  $^{13}\text{C}$  NMR (100 MHz,

$\text{CDCl}_3$ ):  $\delta$  141.3, 138.9, 135.3, 131.0, 130.6, 130.3, 129.2, 128.7, 128.5, 128.4, 128.3, 127.4, 127.3, 127.1, 126.9, 126.6, 126.5, 126.4, 126.3, 126.2, 125.1, 123.7, 123.3, 122.6, 122.2, 40.2; IR (KBr): 3064, 1593, 1492, 1443, 1398, 1267, 1216, 1170, 1030, 882, 756, 701  $\text{cm}^{-1}$ ; MS (EI):  $m/z$  394 ( $\text{M}^+$ ); HRMS (EI):  $m/z$  calcd for  $\text{C}_{31}\text{H}_{22}$  ( $\text{M}^+$ ): 394.1722, found: 394.1716.

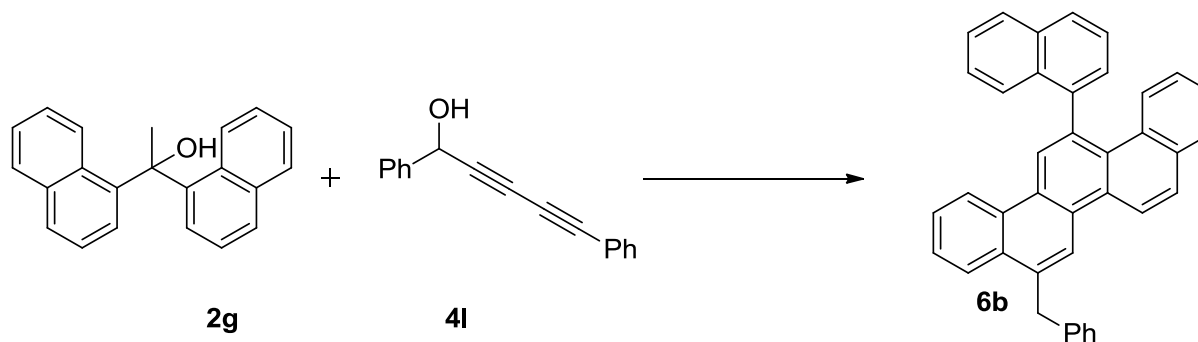

**5-Benzyl-13-(naphthalen-1-yl)picene (6b):** 66 mg, 73% yield, white solid;  $R_f$  = 0.6 (hexanes: EtOAc = 95:5) mp 211-213  $^{\circ}\text{C}$ ;  $^1\text{H}$  NMR (500 MHz,  $\text{CDCl}_3$ ):  $\delta$  8.77 (d,  $J$  = 9.3 Hz, 1H), 8.71 (s, 1H), 8.67 (dd,  $J$  = 13.4, 6.2 Hz, 2H), 8.10–8.04 (m, 1H), 7.99–7.90 (m, 3H), 7.82 (d,  $J$  = 6.7 Hz, 1H), 7.54 (tdd,  $J$  = 16.6, 15.1, 7.7 Hz, 6H), 7.43–7.38 (m, 1H), 7.32–7.23 (m, 5H), 7.18–7.11 (m, 2H), 6.83 (ddd,  $J$  = 8.6, 6.9, 1.5 Hz, 1H), 4.65 (s, 2H);  $^{13}\text{C}$  NMR (125 MHz,  $\text{CDCl}_3$ ):  $\delta$  143.7, 140.4, 136.4, 135.7, 134.0, 133.0, 132.2, 131.3, 130.7, 130.5, 129.8, 128.7, 128.7, 128.6, 128.3, 128.2, 128.0, 127.8, 127.7, 127.4, 126.9, 126.8, 126.7, 126.6, 126.5, 126.4, 126.3, 126.2, 126.1, 125.9, 125.4, 125.0, 123.8, 123.1, 121.7, 40.4; IR (KBr): 2924, 2854, 1457, 1261, 1180, 1079, 1025, 801, 780, 753, 695  $\text{cm}^{-1}$ ; MS (EI):  $m/z$  494 ( $\text{M}^+$ ); HRMS (EI):  $m/z$  calcd for  $\text{C}_{39}\text{H}_{26}$  ( $\text{M}^+$ ): 494.2035, found: 494.2027.

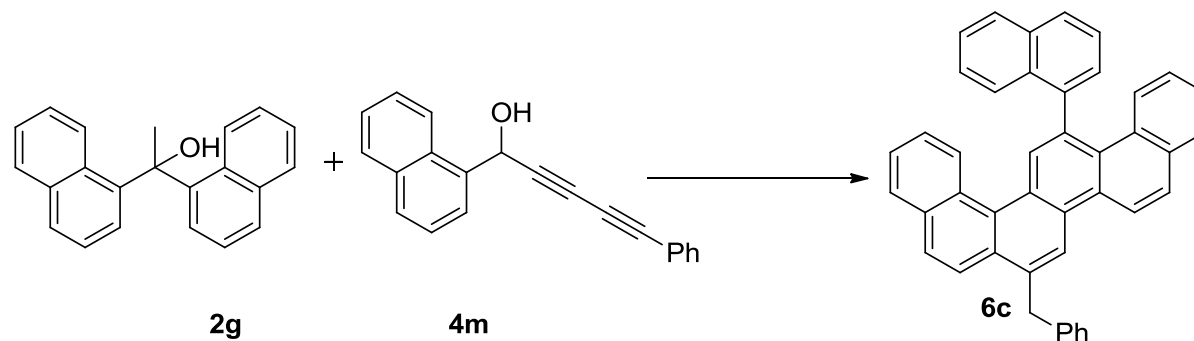

**8-Benzyl-16-(naphthalen-1-yl)benzo[*a*]picene (6c):** 64 mg, 71% yield, white solid;  $R_f = 0.2$  (hexanes); mp 237-239 °C;  $^1\text{H NMR}$  (500 MHz,  $\text{CDCl}_3$ ):  $\delta$  9.10 (t,  $J = 7.0$  Hz, 1H), 8.91 (d,  $J = 8.6$  Hz, 1H), 8.82 (d,  $J = 9.3$  Hz, 1H), 8.78 (s, 1H), 8.02–7.97 (m, 2H), 7.94–7.83 (m, 5H), 7.79 (d,  $J = 8.9$  Hz, 1H), 7.66 (d,  $J = 8.7$  Hz, 1H), 7.55–7.41 (m, 5H), 7.35–7.23 (m, 6H), 7.18–7.15 (m, 1H), 6.89 (ddd,  $J = 8.5, 6.9, 1.4$  Hz, 1H), 4.68 (d,  $J = 37.1$  Hz, 2H).;  $^{13}\text{C NMR}$  (125 MHz,  $\text{CDCl}_3$ ):  $\delta$  143.4, 140.6, 135.3, 134.6, 134.2, 133.1, 133.0, 132.1, 131.9, 130.5, 130.3, 130.2, 130.1, 129.6, 129.5, 128.8, 128.8, 128.7, 128.6, 128.4, 128.2, 128.2, 128.0, 127.8, 127.6, 127.2, 126.2, 126.1, 126.0, 125.9, 125.3, 123.7, 122.6, 121.6, 40.5.; IR (KBr): 2923, 1598, 1498, 1450, 1214, 825, 787, 752, 698  $\text{cm}^{-1}$ ; MS (EI):  $m/z$  544 ( $\text{M}^+$ ); HRMS (EI):  $m/z$  calcd for  $\text{C}_{43}\text{H}_{28}$  ( $\text{M}^+$ ): 544.2191, found: 544.2187.

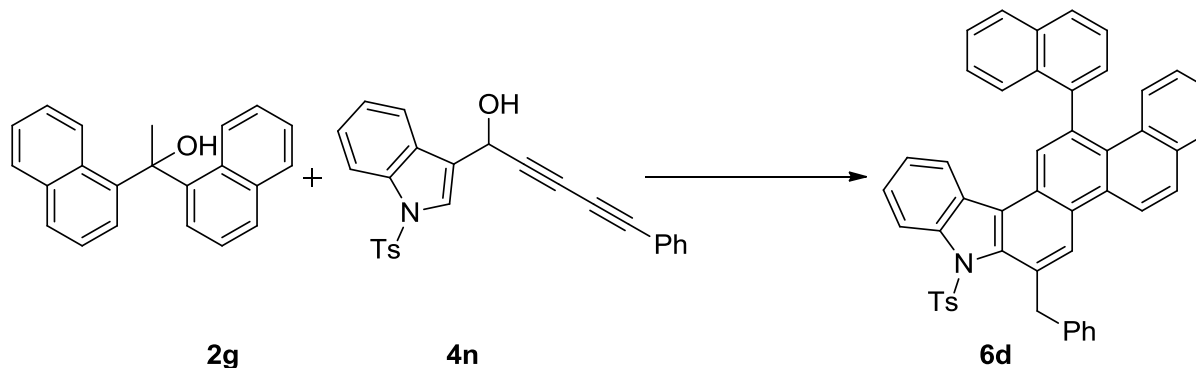

**8-Benzyl-15-(naphthalen-1-yl)-9-tosyl-9H-phenanthro[1,2-*c*]carbazole (6d):** 89 mg, 78% yield, white color solid;  $R_f = 0.2$  (hexanes), mp 192-195 °C;  $^1\text{H NMR}$  (500 MHz,  $\text{CDCl}_3$ ):  $\delta$  8.66 (d,  $J = 9.3$  Hz, 1H), 8.62 (s, 1H), 8.54 (s, 1H), 8.29 (d,  $J = 8.1$  Hz, 1H), 8.08–7.91 (m, 4H),

7.86 (d,  $J = 7.9$  Hz, 1H), 7.68–7.57 (m, 2H), 7.52 (dd,  $J = 8.6, 2.7$  Hz, 2H), 7.49–7.43 (m, 1H), 7.43–7.37 (m, 1H), 7.37–7.26 (m, 6H), 7.22 (dddd,  $J = 9.7, 8.3, 4.7, 0.9$  Hz, 2H), 6.98 (d,  $J = 8.4$  Hz, 2H), 6.87 (ddd,  $J = 8.5, 6.9, 1.4$  Hz, 1H), 6.74 (d,  $J = 8.1$  Hz, 2H), 5.07 (q,  $J = 16.3$  Hz, 2H), 2.08 (s, 3H);  $^{13}\text{C}$  NMR (75 MHz,  $\text{CDCl}_3$ ):  $\delta$  144.3, 143.3, 142.0, 141.6, 140.01, 137.2, 134.0, 133.9, 133.0, 132.0, 131.6, 130.5, 130.4, 129.9, 129.6, 129.1, 128.7, 128.6, 128.5, 128.3, 128.2, 128.1, 127.9, 127.5, 127.0, 126.9, 126.8, 126.3, 126.1, 125.9, 125.9, 125.8, 125.4, 125.0, 122.3, 121.9, 119.7, 40.6, 29.7, 21.4.; IR (KBr): 2924, 1597, 1489, 1447, 1176, 1092, 809, 754, 698  $\text{cm}^{-1}$ ; MS (EI):  $m/z$  687 ( $\text{M}^+$ ); HRMS (EI):  $m/z$  calcd for  $\text{C}_{48}\text{H}_{33}\text{NO}_2\text{S}$  ( $\text{M}^+$ ): 687.2232, found: 687.2230.

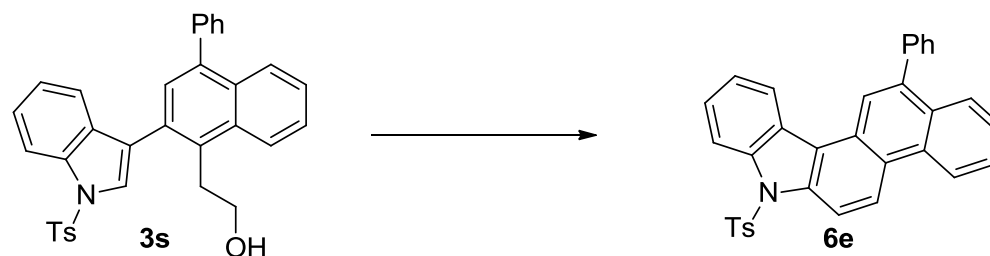

**13-Phenyl-7-tosyl-7H-naphtho[1,2-c]carbazole (6e):** To a stirred solution of 2-(4-phenyl-2-(1-tosyl-1H-indol-3-yl)naphthalen-1-yl)ethanol **3s** (1.0 mmol) in 5 mL of acetonitrile was added IBX (1.2 mmol) at room temperature and was stirred at 80 °C for 2 h. After the completion of reaction (monitored by TLC), the reaction mixture was filtered through celite and filtrate was washed with aqueous  $\text{NaHCO}_3$  (2 x 10 mL), the organic layer was separated dried over  $\text{Na}_2\text{SO}_4$  and concentrated under reduced pressure to afford 2-(4-phenyl-2-(1-tosyl-1H-indol-3-yl)naphthalen-1-yl)acetaldehyde. To the crude aldehyde, was added *p*TSA (5 mol%) at room temperature in 5 mL acetonitrile and stirred for 1 h. The reaction mixture was concentrated under reduced pressure and purified by column chromatography on silica gel (EtOAc: hexanes) to afford the corresponding naphtha carbazole **7e** in 82% yield as pale yellow solid;  $R_f = 0.6$  (hexanes: EtOAc = 9:1) mp 218–221 °C;  $^1\text{H}$  NMR (500 MHz,  $\text{CDCl}_3$ ):  $\delta$  8.87 (dd,  $J = 18.8, 8.8$  Hz, 2H), 8.75 (d,  $J = 9.3$  Hz, 1H), 8.62 (s, 1H), 8.52 (d,  $J = 8.3$  Hz, 1H), 8.45 (d,  $J = 7.9$  Hz, 1H), 7.95 (dd,  $J = 8.2, 0.8$  Hz, 1H), 7.77–7.68 (m, 3H), 7.63–7.59 (m, 2H), 7.59–7.49 (m, 5H), 7.47–7.42 (m, 1H), 7.06 (t,  $J = 8.0$  Hz, 2H), 2.22 (s, 3H);  $^{13}\text{C}$  NMR (100 MHz,  $\text{CDCl}_3$ ):  $\delta$  145.0, 141.0, 140.9, 140.8, 140.75, 140.4, 138.6, 138.2, 137.4, 137.3, 134.9, 131.0, 130.1, 129.7, 128.4, 127.6, 127.1,



127.0, 126.8, 126.5, 126.4, 126.2, 124.3, 123.1, 122.9, 122.6, 121.1, 115.4, 114.5, 21.5; IR (KBr): 2923, 1601, 1496, 1444, 1370, 1245, 1219, 1171, 1091, 1046, 748, 668  $\text{cm}^{-1}$ ; MS (EI):  $m/z$  497 ( $\text{M}^+$ ); HRMS (EI):  $m/z$  calcd for  $\text{C}_{33}\text{H}_{23}\text{NO}_2\text{S}$  ( $\text{M}^+$ ): 497.1449, found: 497.1443.

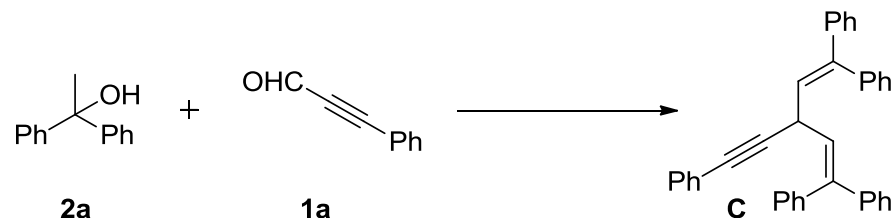

**(3-(Phenylethynyl)penta-1,4-diene-1,1,5,5-tetrayl)tetrabenzene (C):** 37 mg, 19% yield, white solid;  $R_f = 0.2$  (hexanes), mp 84-86  $^{\circ}\text{C}$ ;  $^1\text{H}$  NMR (500 MHz,  $\text{CDCl}_3$ ):  $\delta$  7.46–7.39 (m, 2H), 7.32–7.21 (m, 13H), 7.21–7.12 (m, 6H), 7.04 (ddd,  $J = 7.0, 6.5, 4.8$  Hz, 4H), 6.15 (d,  $J = 9.7$  Hz, 2H), 4.29 (t,  $J = 9.7$  Hz, 1H);  $^{13}\text{C}$  NMR (100 MHz,  $\text{CDCl}_3$ ):  $\delta$  142.2, 141.8, 138.8, 131.6, 129.6, 128.1, 128.1, 128.0, 127.7, 127.7, 127.4, 127.1, 127.0, 123.6, 90.5, 82.2, 33.0; IR (KBr): 3022, 1597, 1505, 1444, 1380, 1074, 1030, 903, 764, 699  $\text{cm}^{-1}$ ; MS (EI):  $m/z$  472 ( $\text{M}^+$ ); HRMS (EI):  $m/z$  calcd for  $\text{C}_{37}\text{H}_{28}$  ( $\text{M}^+$ ): 472.2191, found: 472.2187.

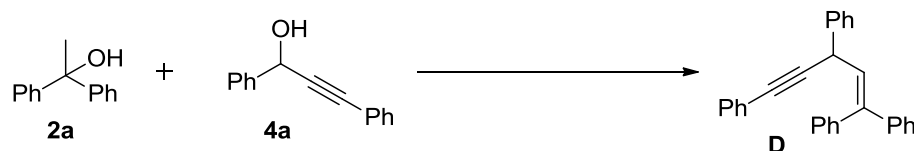

**Pent-1-en-4-yne-1,1,3,5-tetrayl)tetrabenzene (D):** 82 mg, 92% yield, white solid;  $R_f = 0.2$  (hexanes), mp 68-70  $^{\circ}\text{C}$ ;  $^1\text{H}$  NMR (500 MHz,  $\text{CDCl}_3$ ):  $\delta$  7.51–7.41 (m, 6H), 7.40–7.28 (m, 8H), 7.28–7.23 (m, 6H), 6.22 (d,  $J = 10.1$  Hz, 1H), 4.72 (d,  $J = 10.1$  Hz, 1H);  $^{13}\text{C}$  NMR (125 MHz,  $\text{CDCl}_3$ ):  $\delta$  141.7, 140.6, 139.1, 131.7, 129.9, 128.5, 128.4, 128.2, 128.1, 127.8, 127.5, 127.4, 127.4, 126.8, 123.5, 89.7, 83.9, 37.8; IR (KBr): 3023, 2311, 1758, 1598, 1493, 1445, 1214, 1029, 747  $\text{cm}^{-1}$ ; MS (EI):  $m/z$  370 ( $\text{M}^+$ ); HRMS (EI):  $m/z$  calcd for  $\text{C}_{29}\text{H}_{22}$  ( $\text{M}^+$ ): 370.1722, found: 370.1710.

## References:

- 1) a) C. R. Reddy, R. R. Valleti, M. D. Reddy, *J. Org. Chem.*, **2013**, *78*, 6495-6502; b) S. Serra, C. Fuganti, *Synlett* **2003**, *13*, 2005-2010; c) C. R. Reddy, M. D. Reddy *Org. Biomol. Chem.* **2012**, *10*, 4280-4288.
- 2) a) F. Gao, X.-J. Deng, Y. Tang, J.-P. Tang, J. Yang, Y.-M. Zhang, *Tetrahedron Lett.* **2014**, *55*, 880–883; b) R. Matsumoto, H. Nishino, *Syn. Comm*, **2015**, *45*, 1807.
- 3) a) C. R. Reddy, J. Vijaykumar, R. Grée, *Synthesis*, **2013**, *45*, 0830-0836; b) C. R. Reddy, R. R. Valleti, U. Dilipkumar, *Chem. Eur. J.* **2016**, *22*, 2501-2506; c) H. Huang, H. Jiang, H. Cao, J. Zhao, D. Shi, *Tetrahedron* **2012**, *68*, 3135-3144; d) C. F. Xu, M. Xu, L. Q. Yang, C. Y. Li, *J. Org. Chem.* **2012**, *77*, 3010-3016; e) H. Yamabe, A. Mizuno, H. Kusama, N. Iwasawa, *J. Am. Chem. Soc.* **2005**, *127*, 3248-3249; f) B. S. Chinta, B. Baire, *RSC Adv.* **2016**, *6*, 54449-54455.
- 4) Z.-X. Ma, S. He, W. Song, R. P. Hsung, *Org. Lett.* **2012**, *14*, 5736-5739.
- 5) X. Nie, G. Wang, *J. Org. Chem.* **2006**, *71*, 4734-4741.

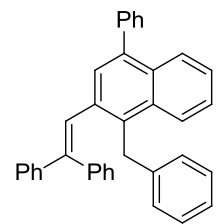

3a

<sup>1</sup>H NMR, 500 MHz, CDCl<sub>3</sub>

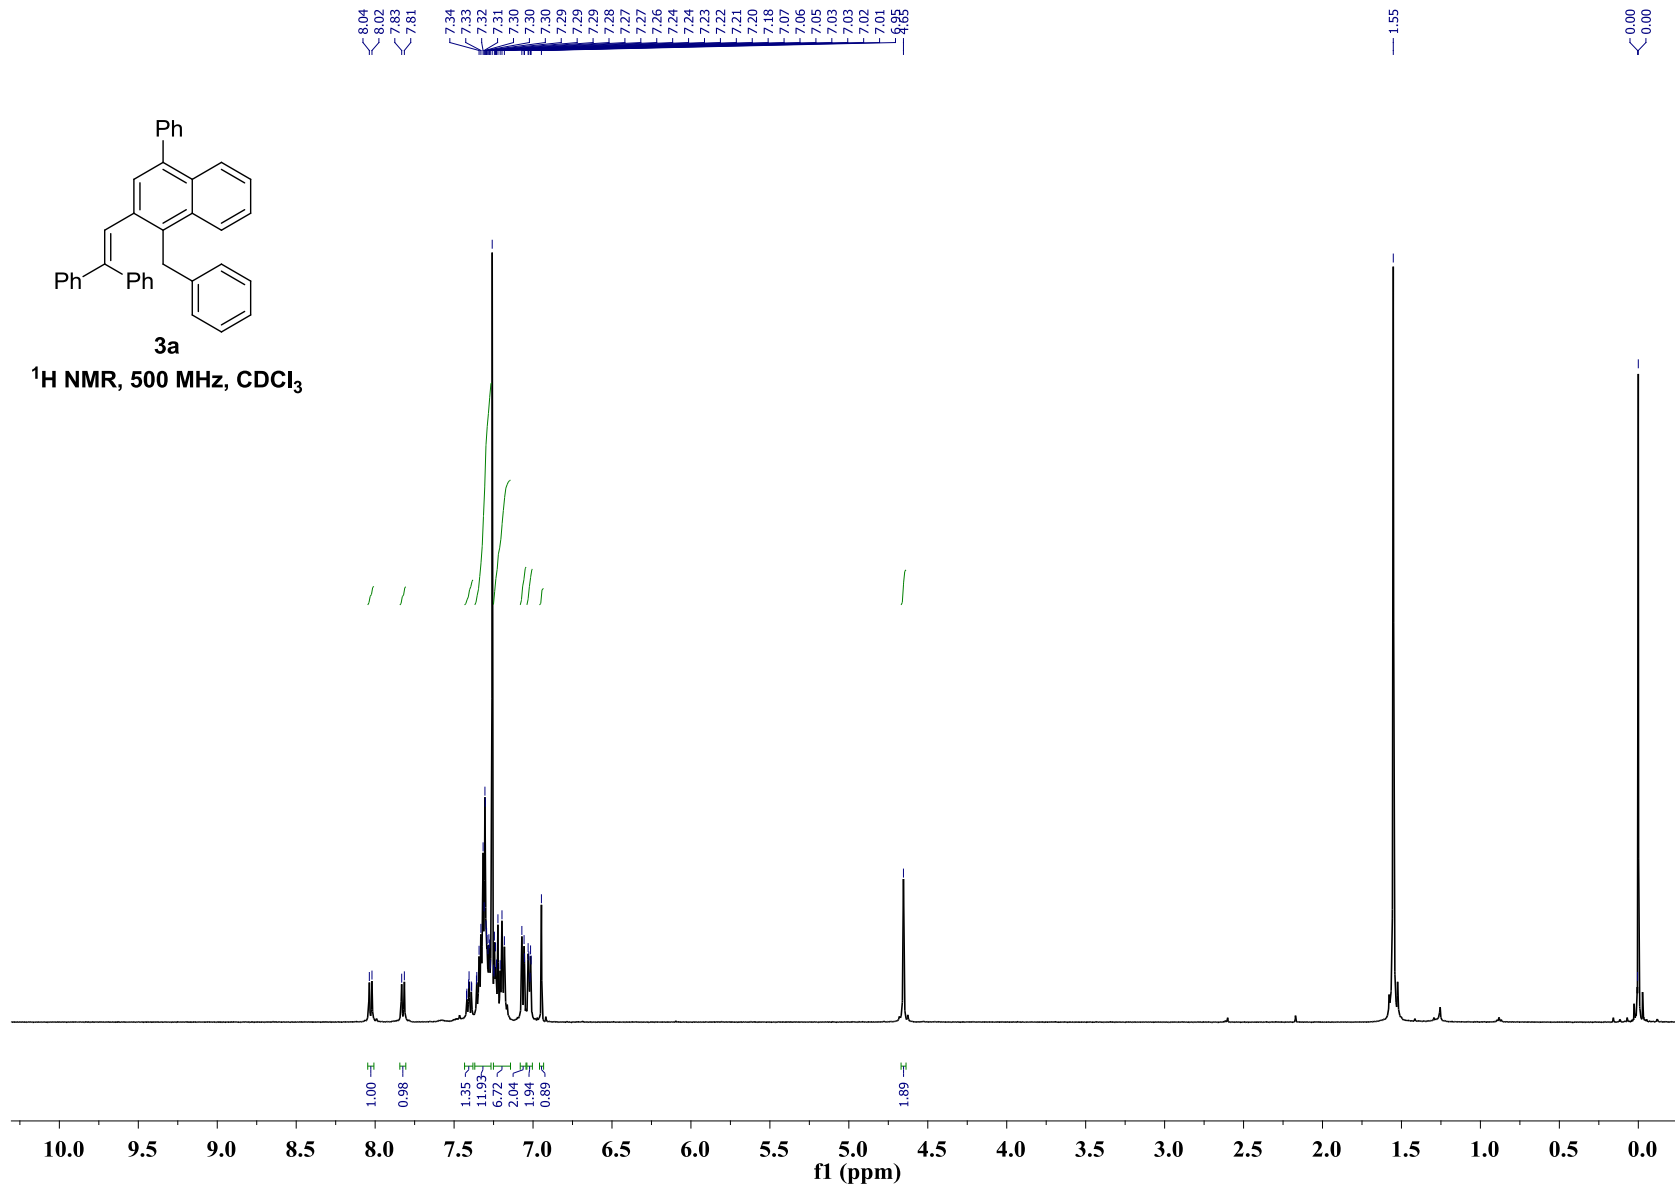

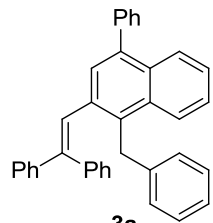

<sup>13</sup>C NMR, 100 MHz, CDCl<sub>3</sub>

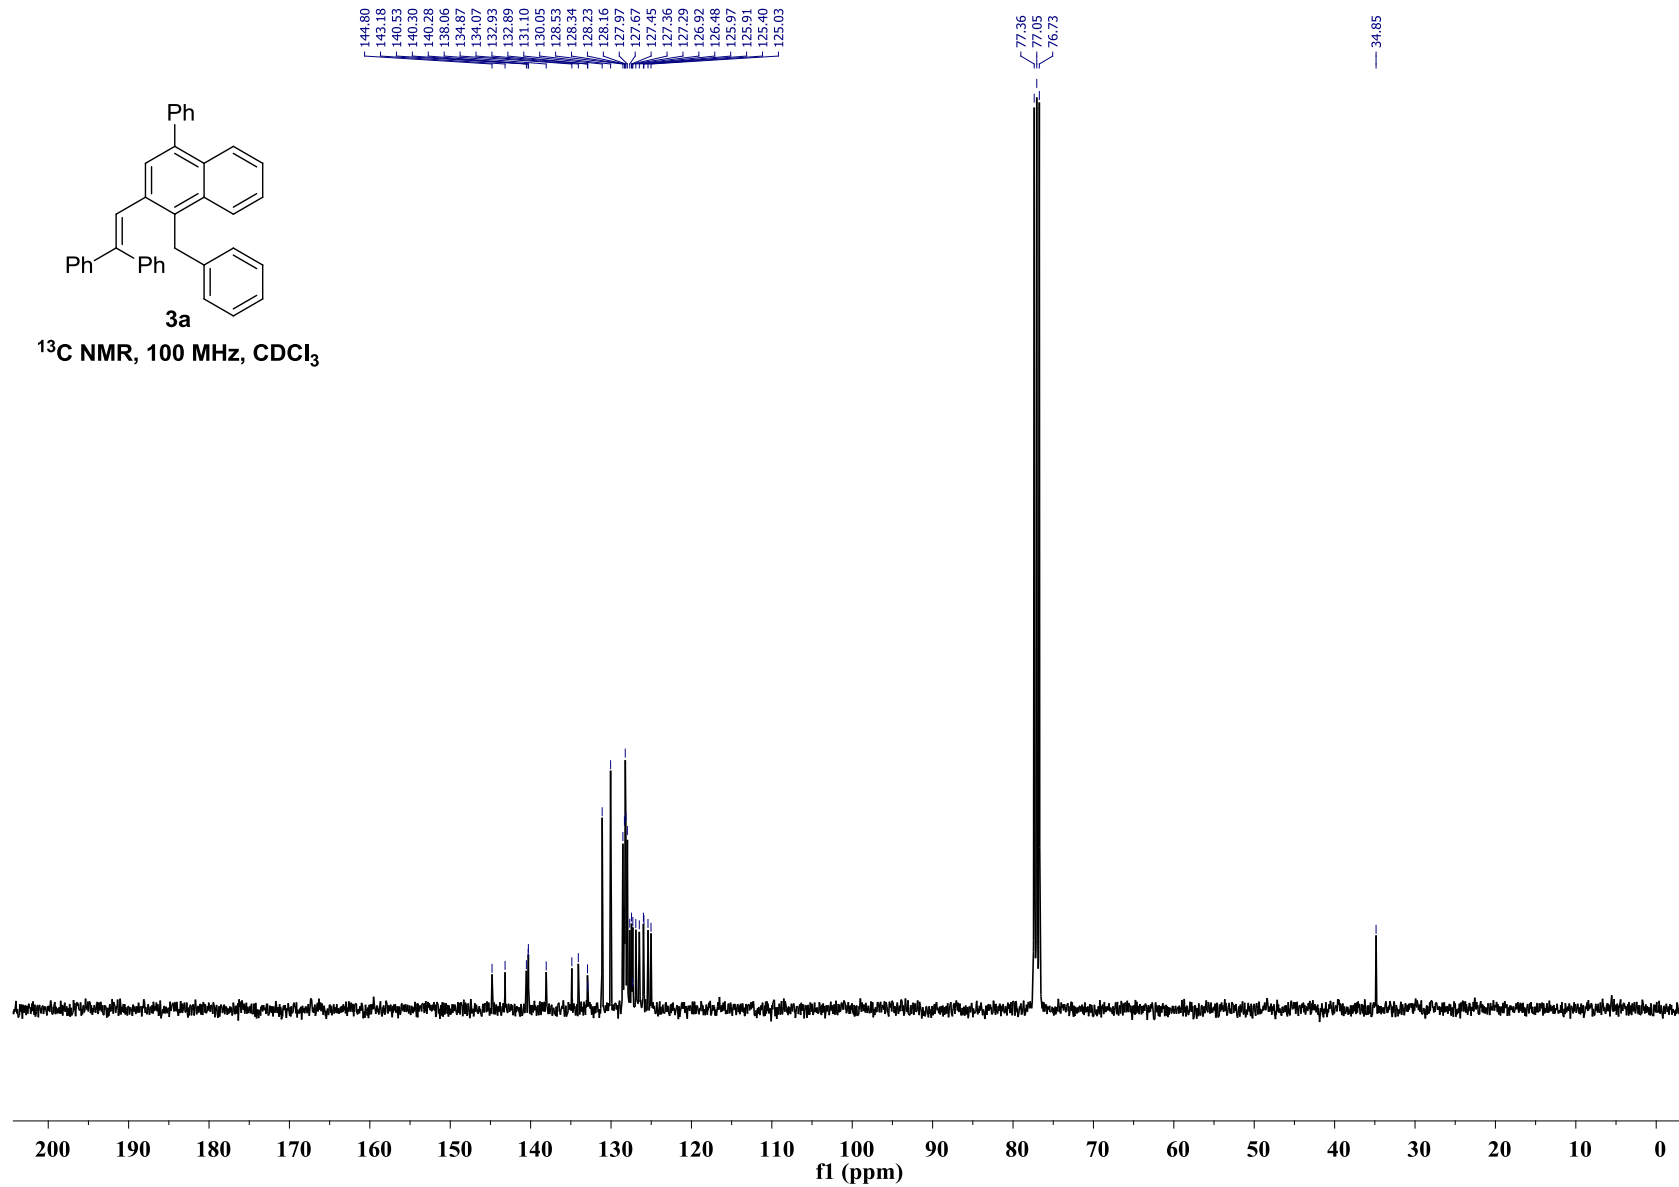

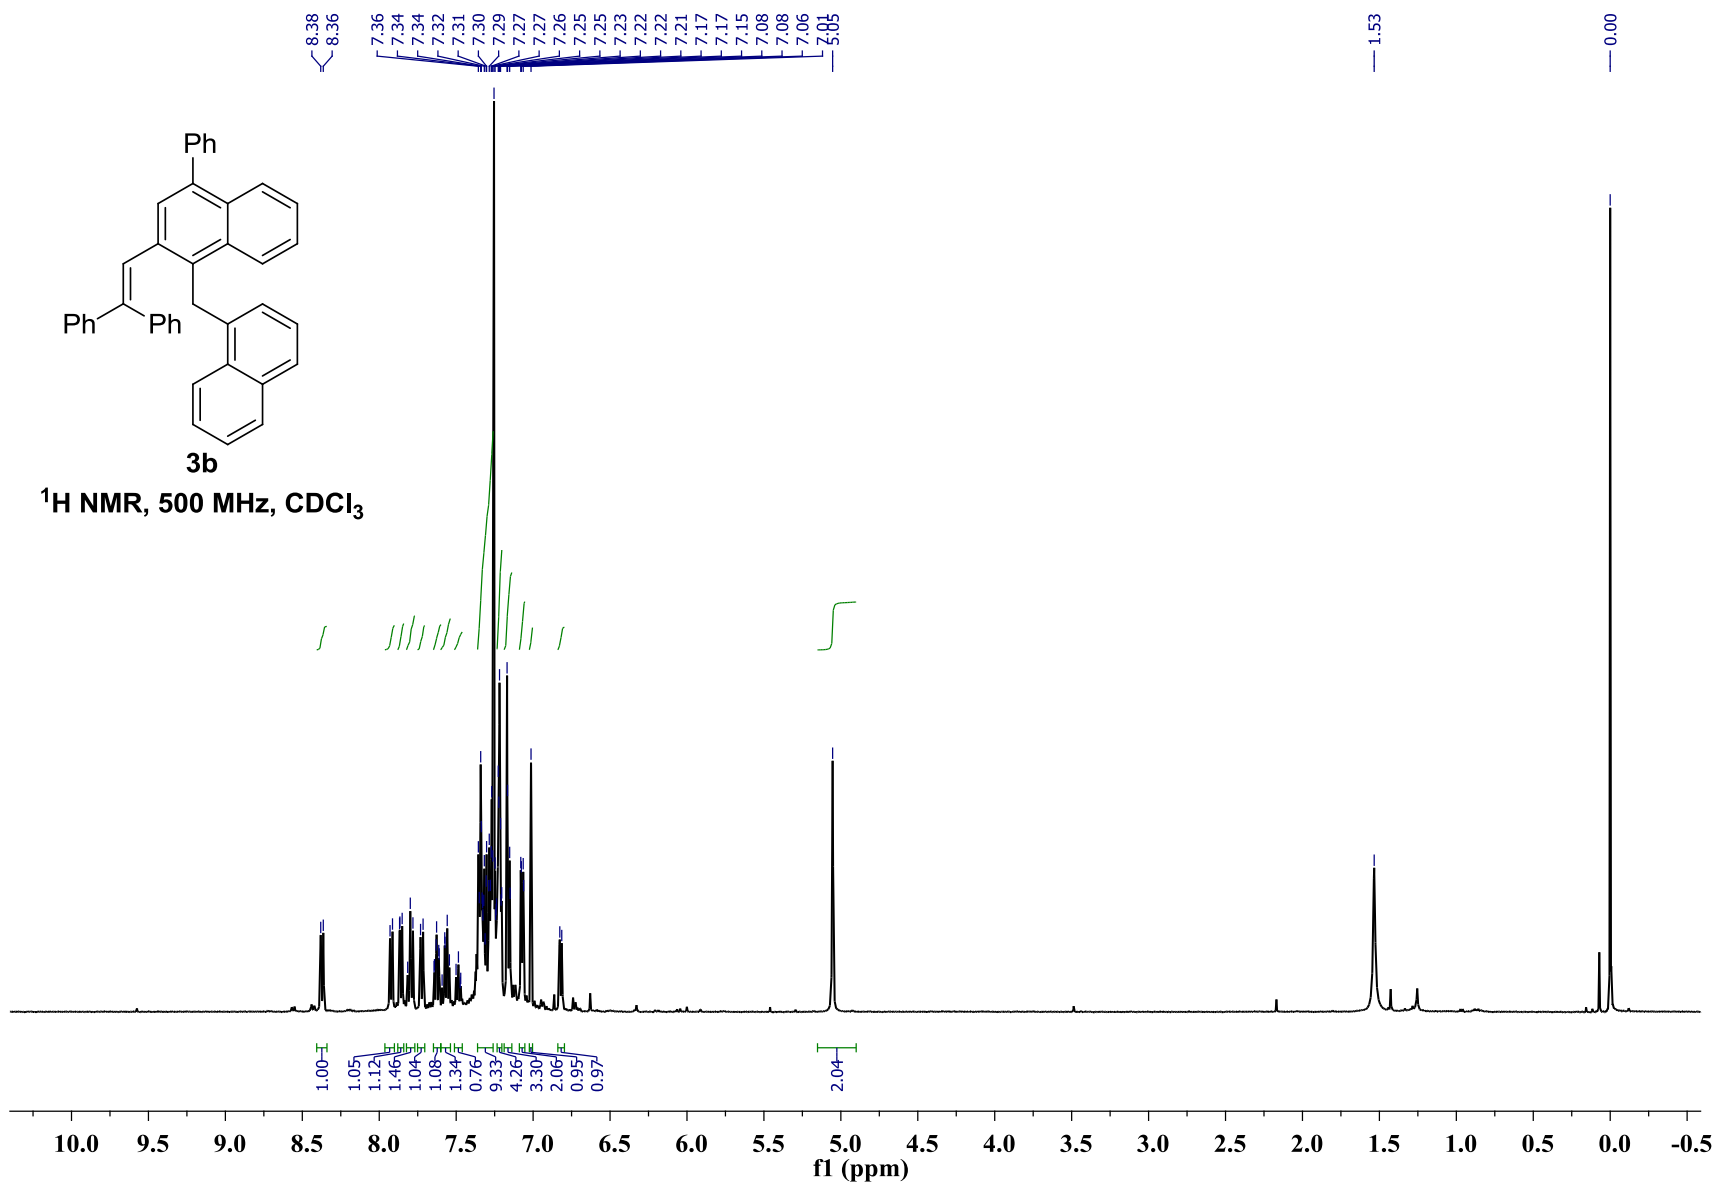

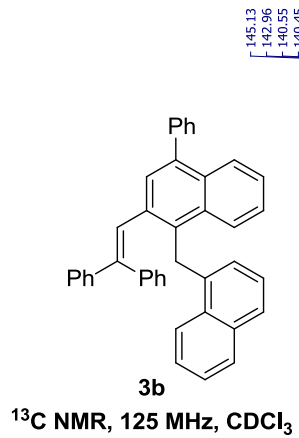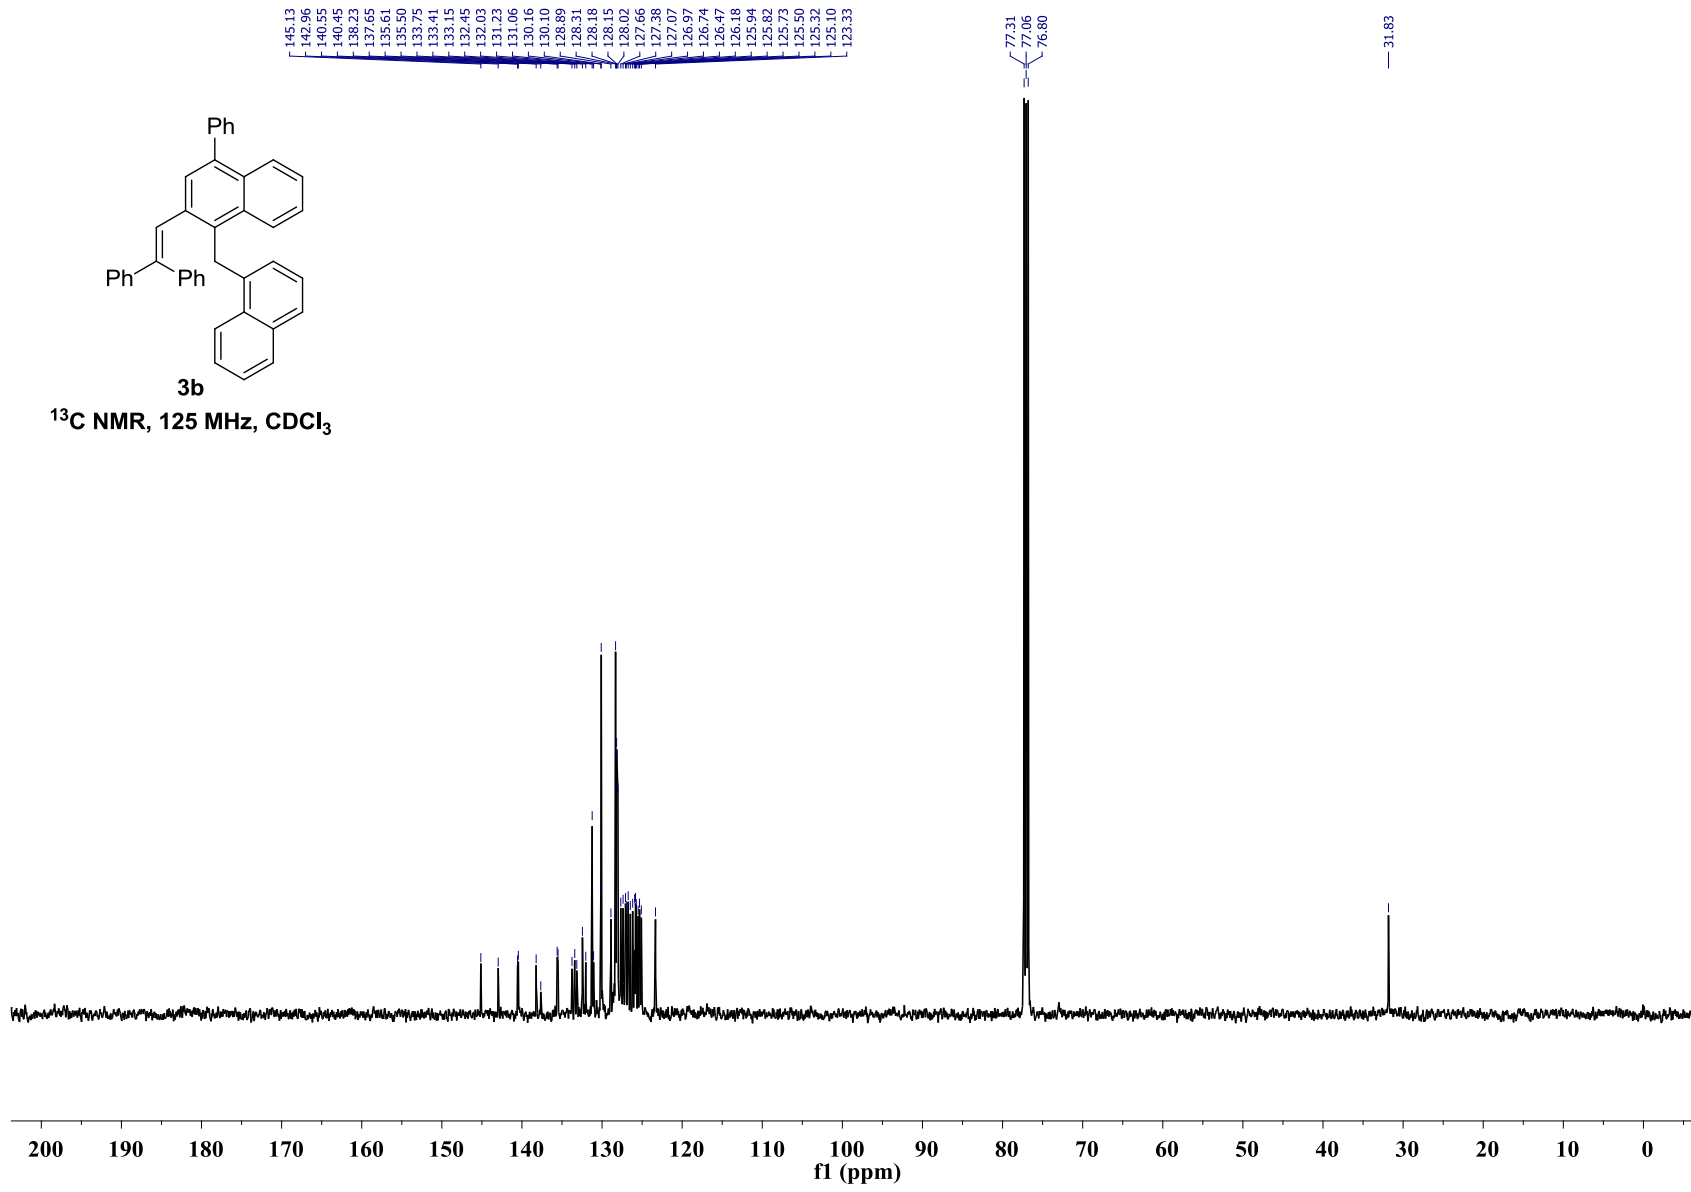

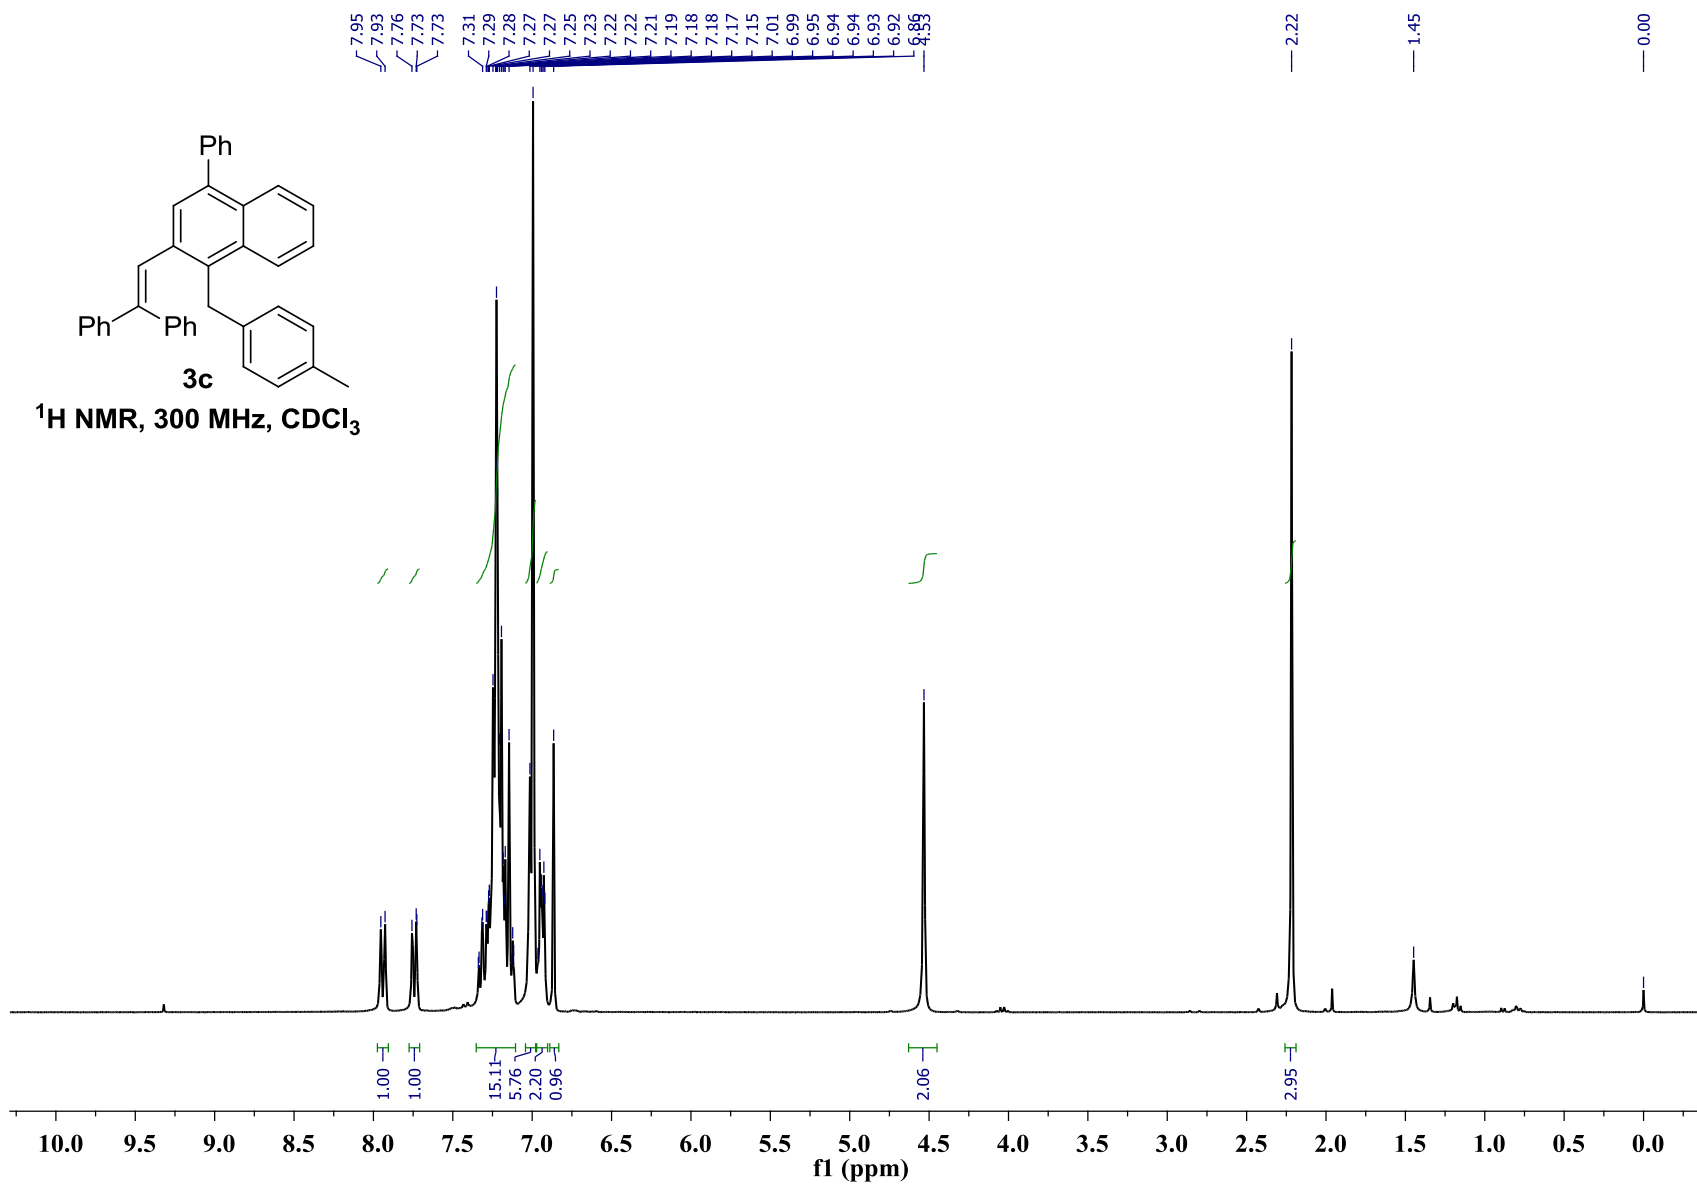

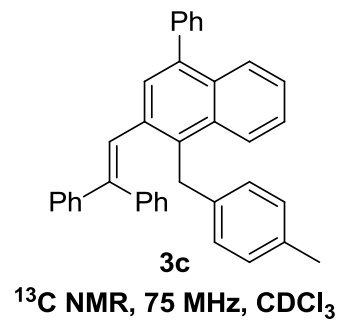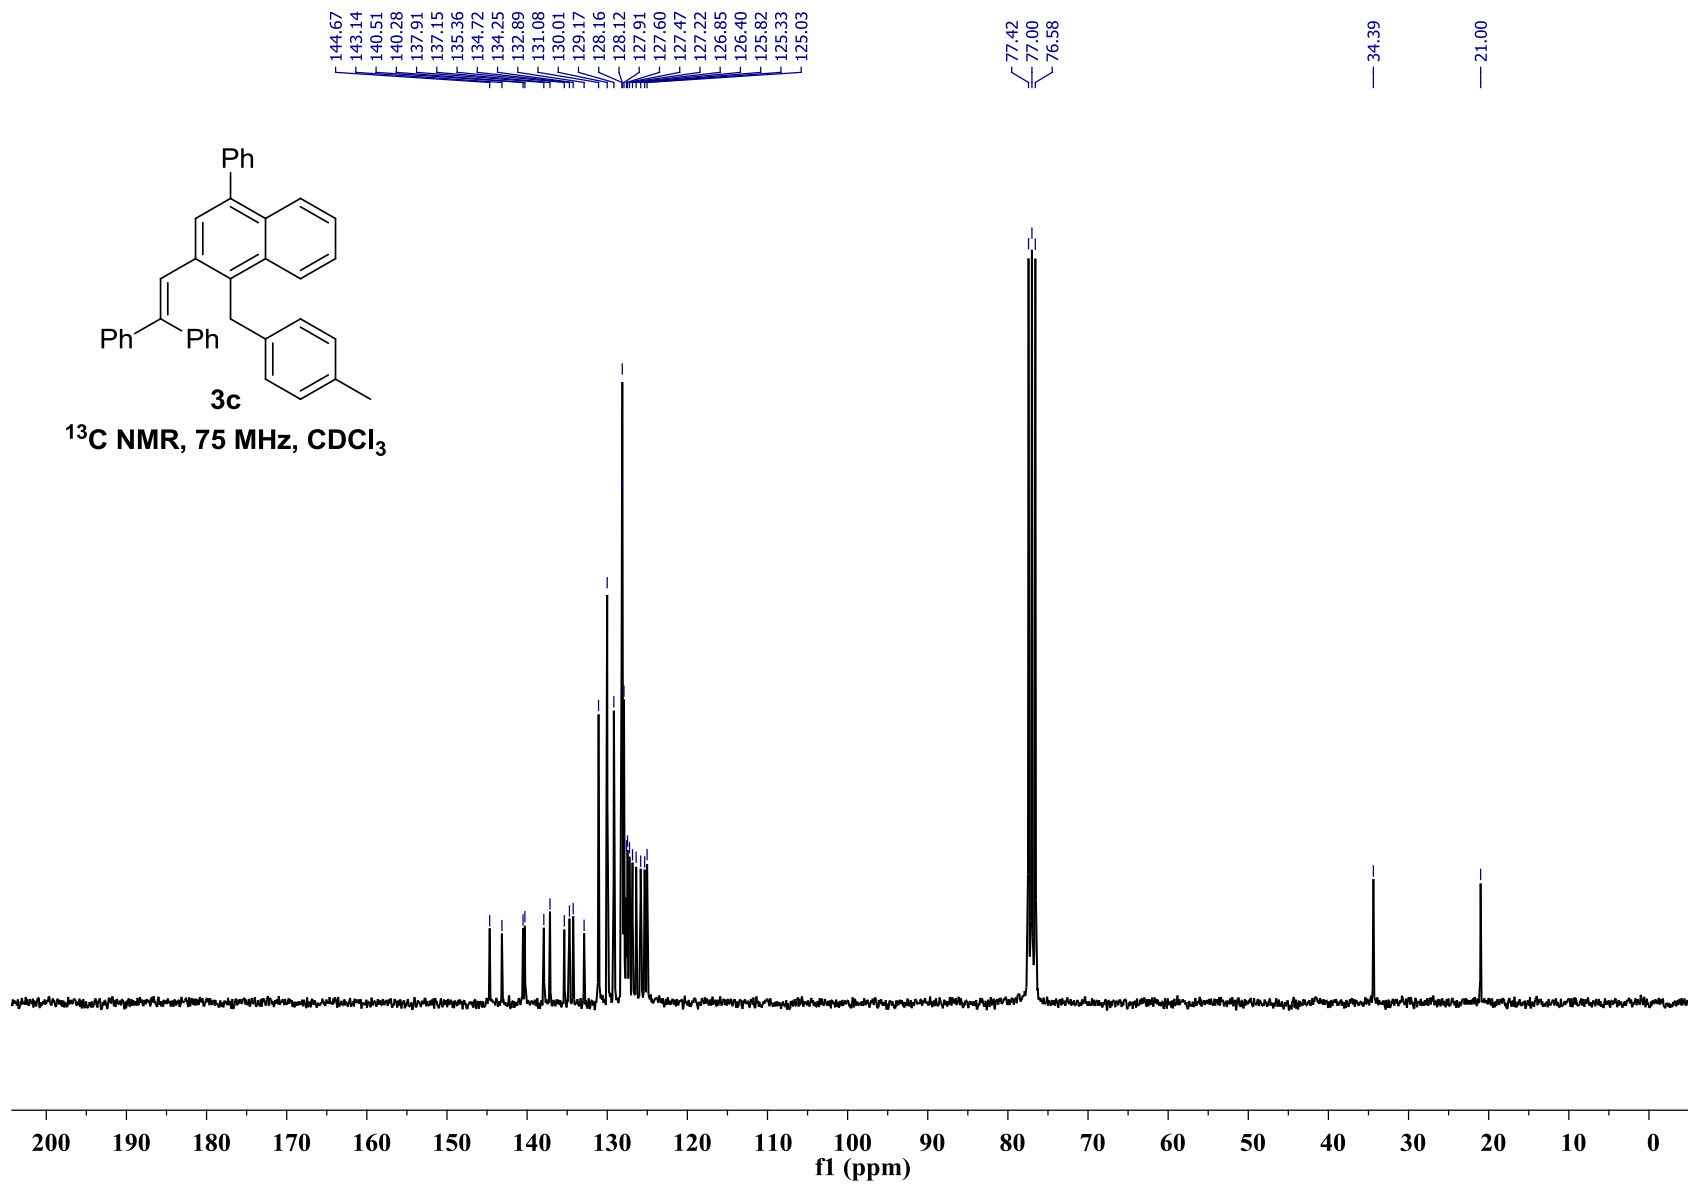



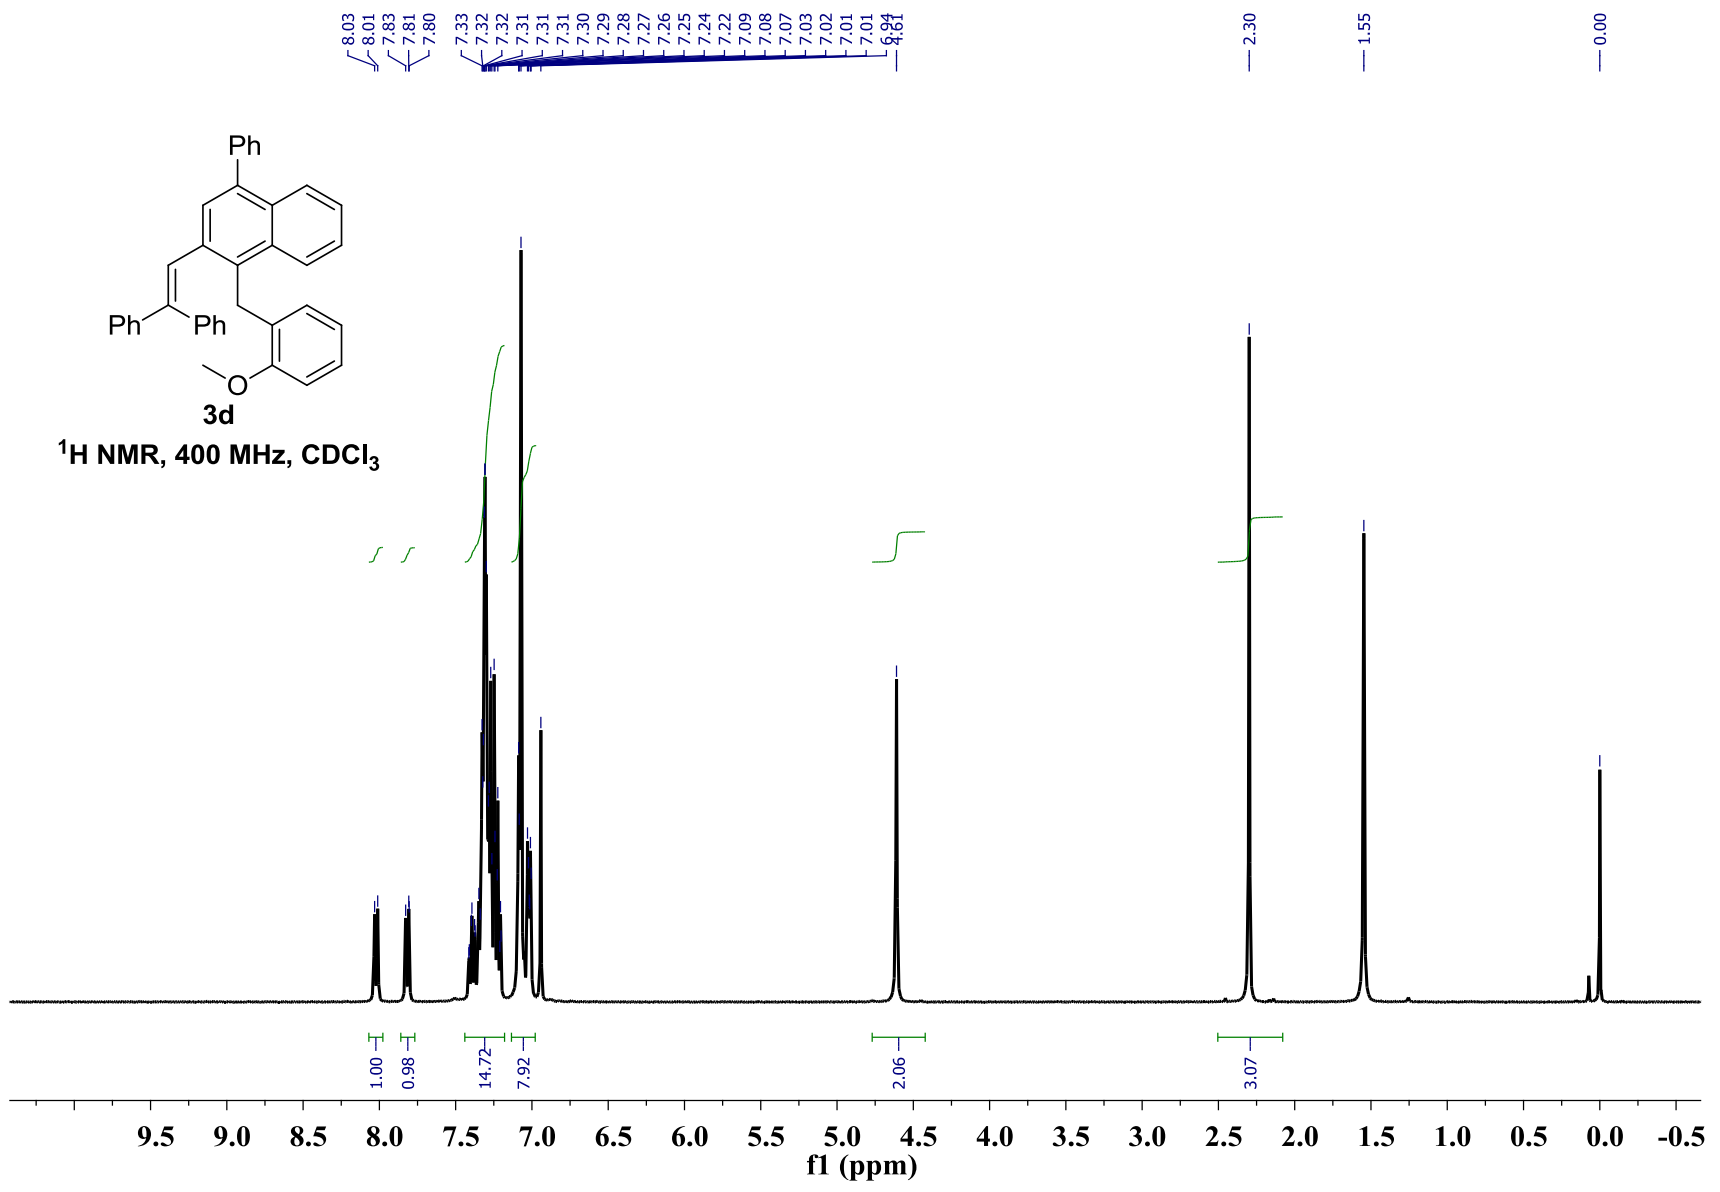

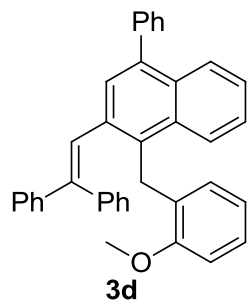

<sup>13</sup>C NMR, 75 MHz, CDCl<sub>3</sub>

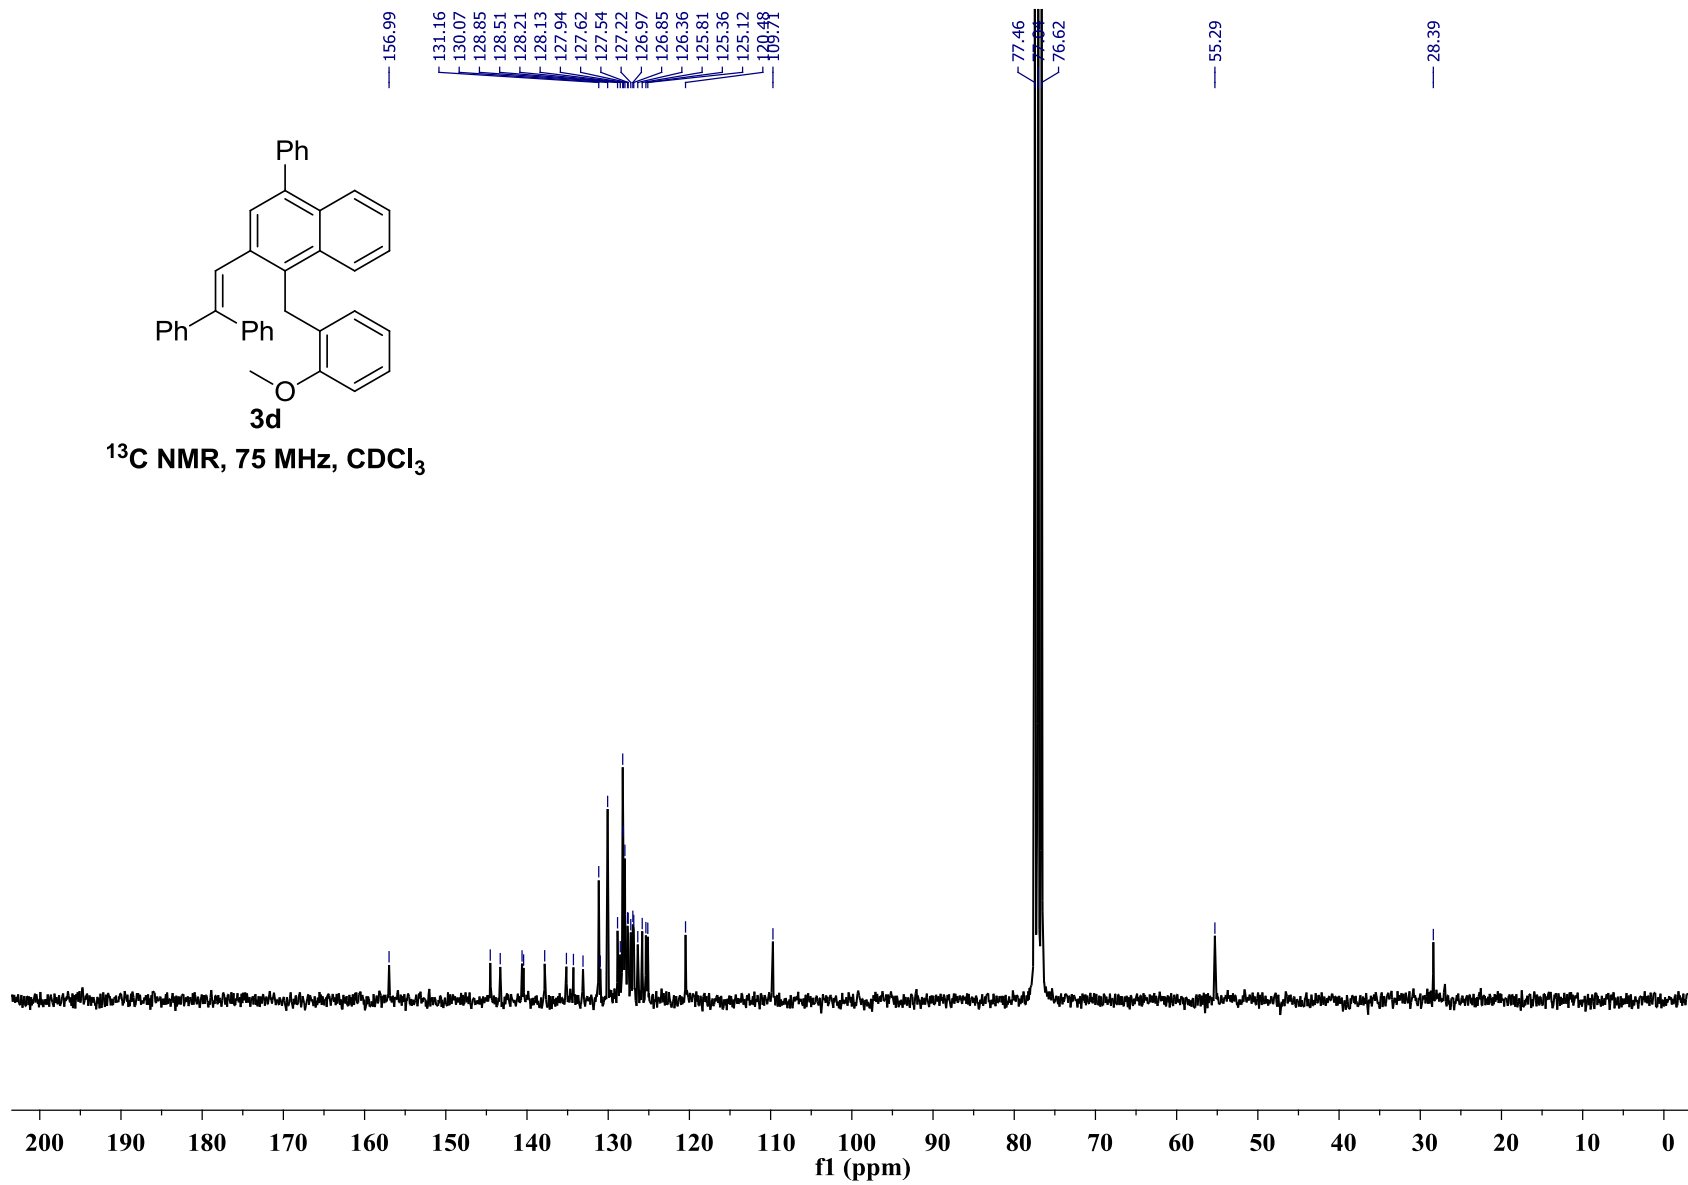

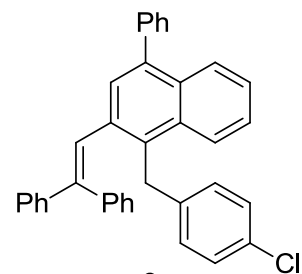

<sup>1</sup>H NMR, 500 MHz, CDCl<sub>3</sub>

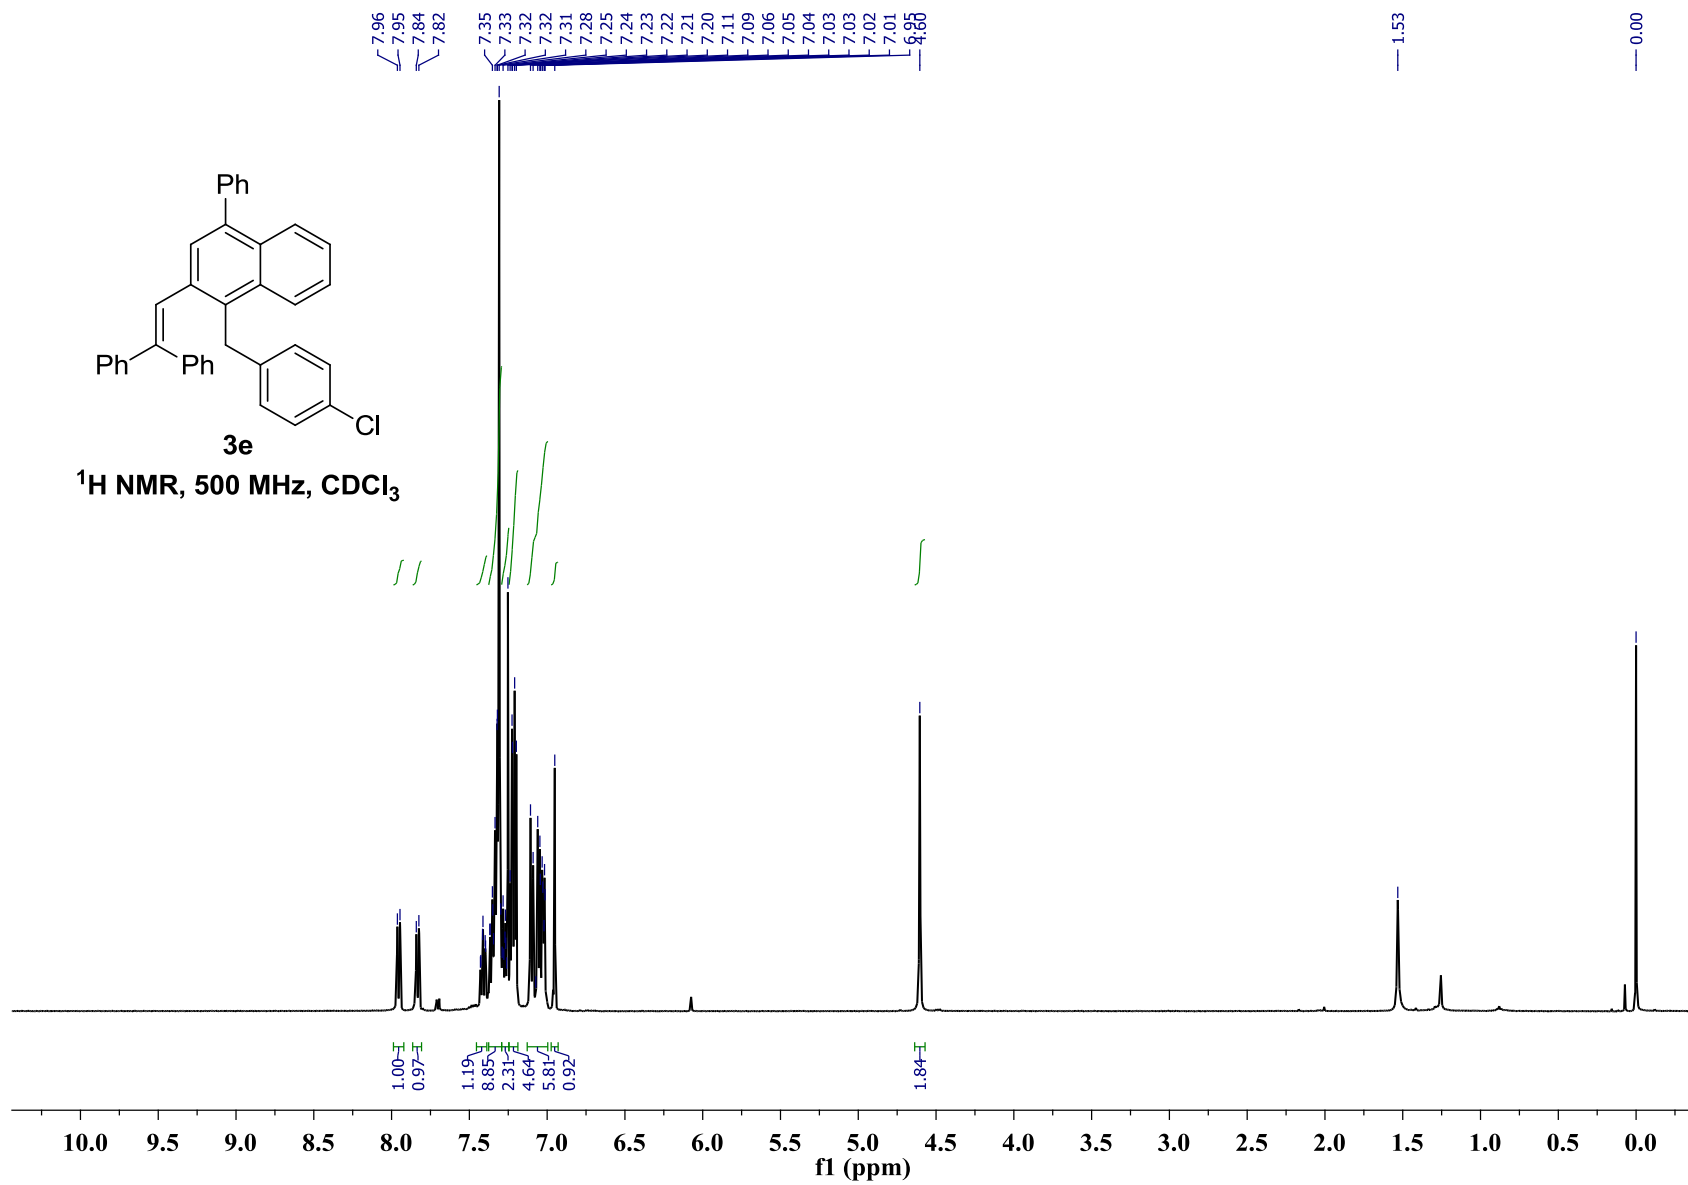



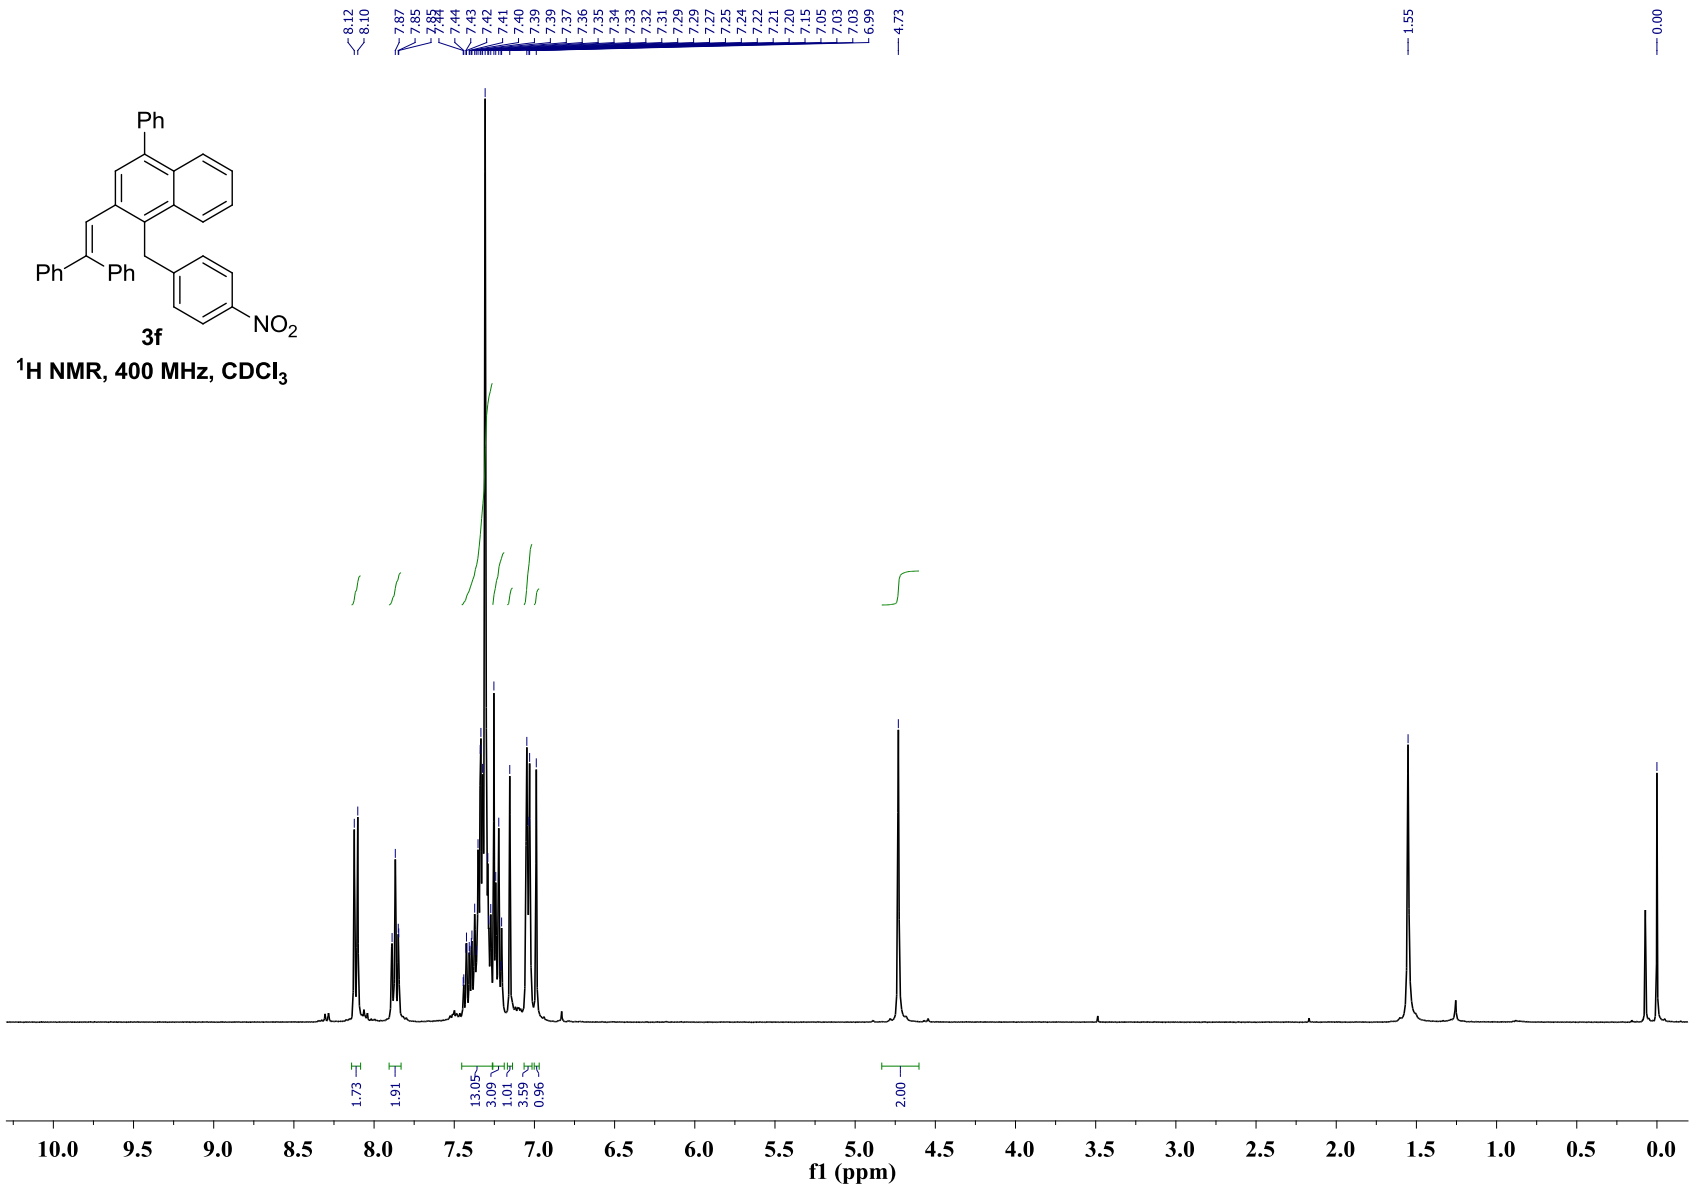

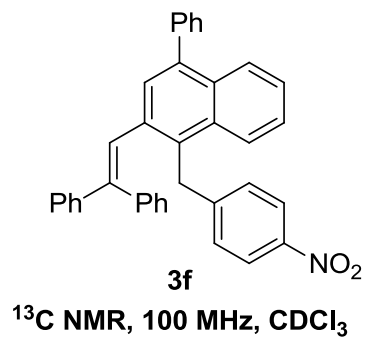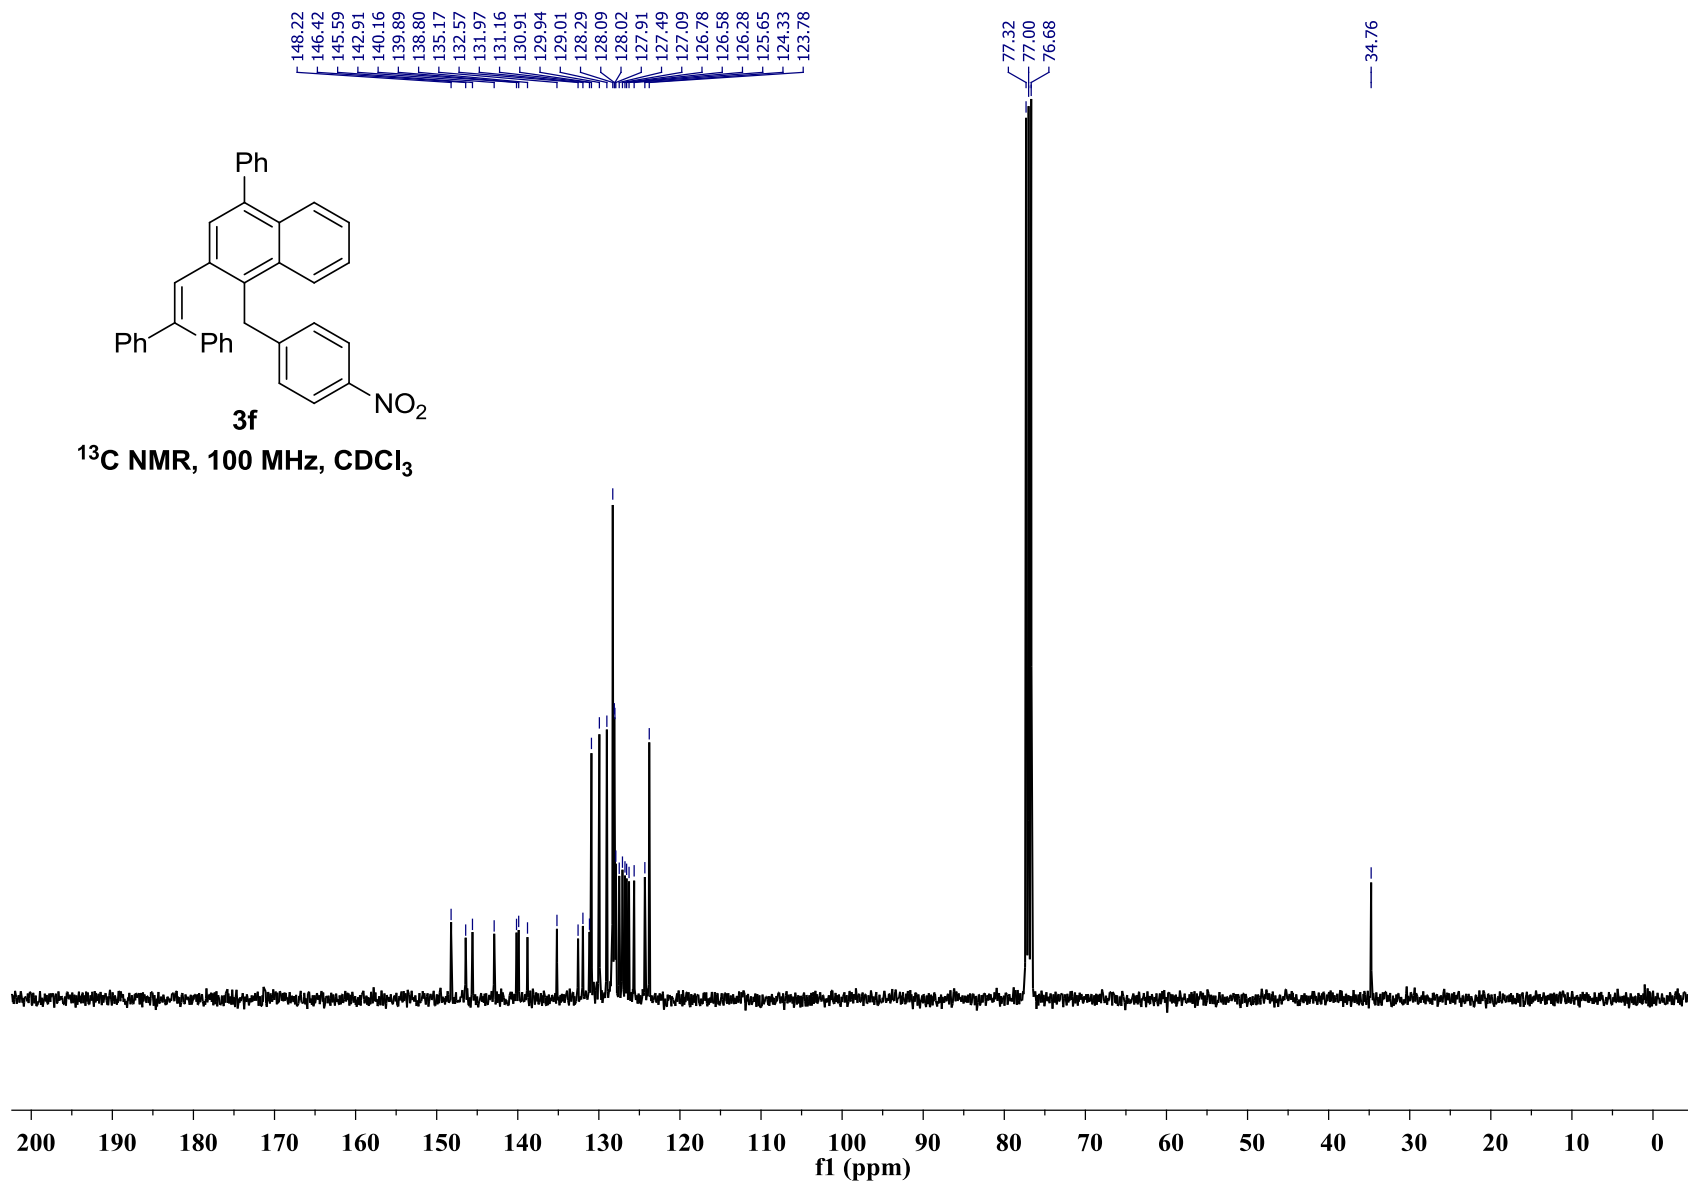

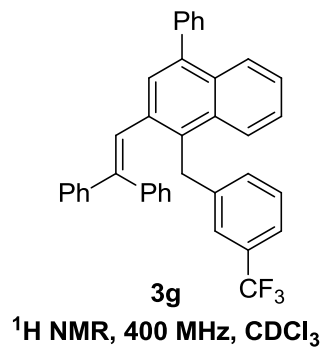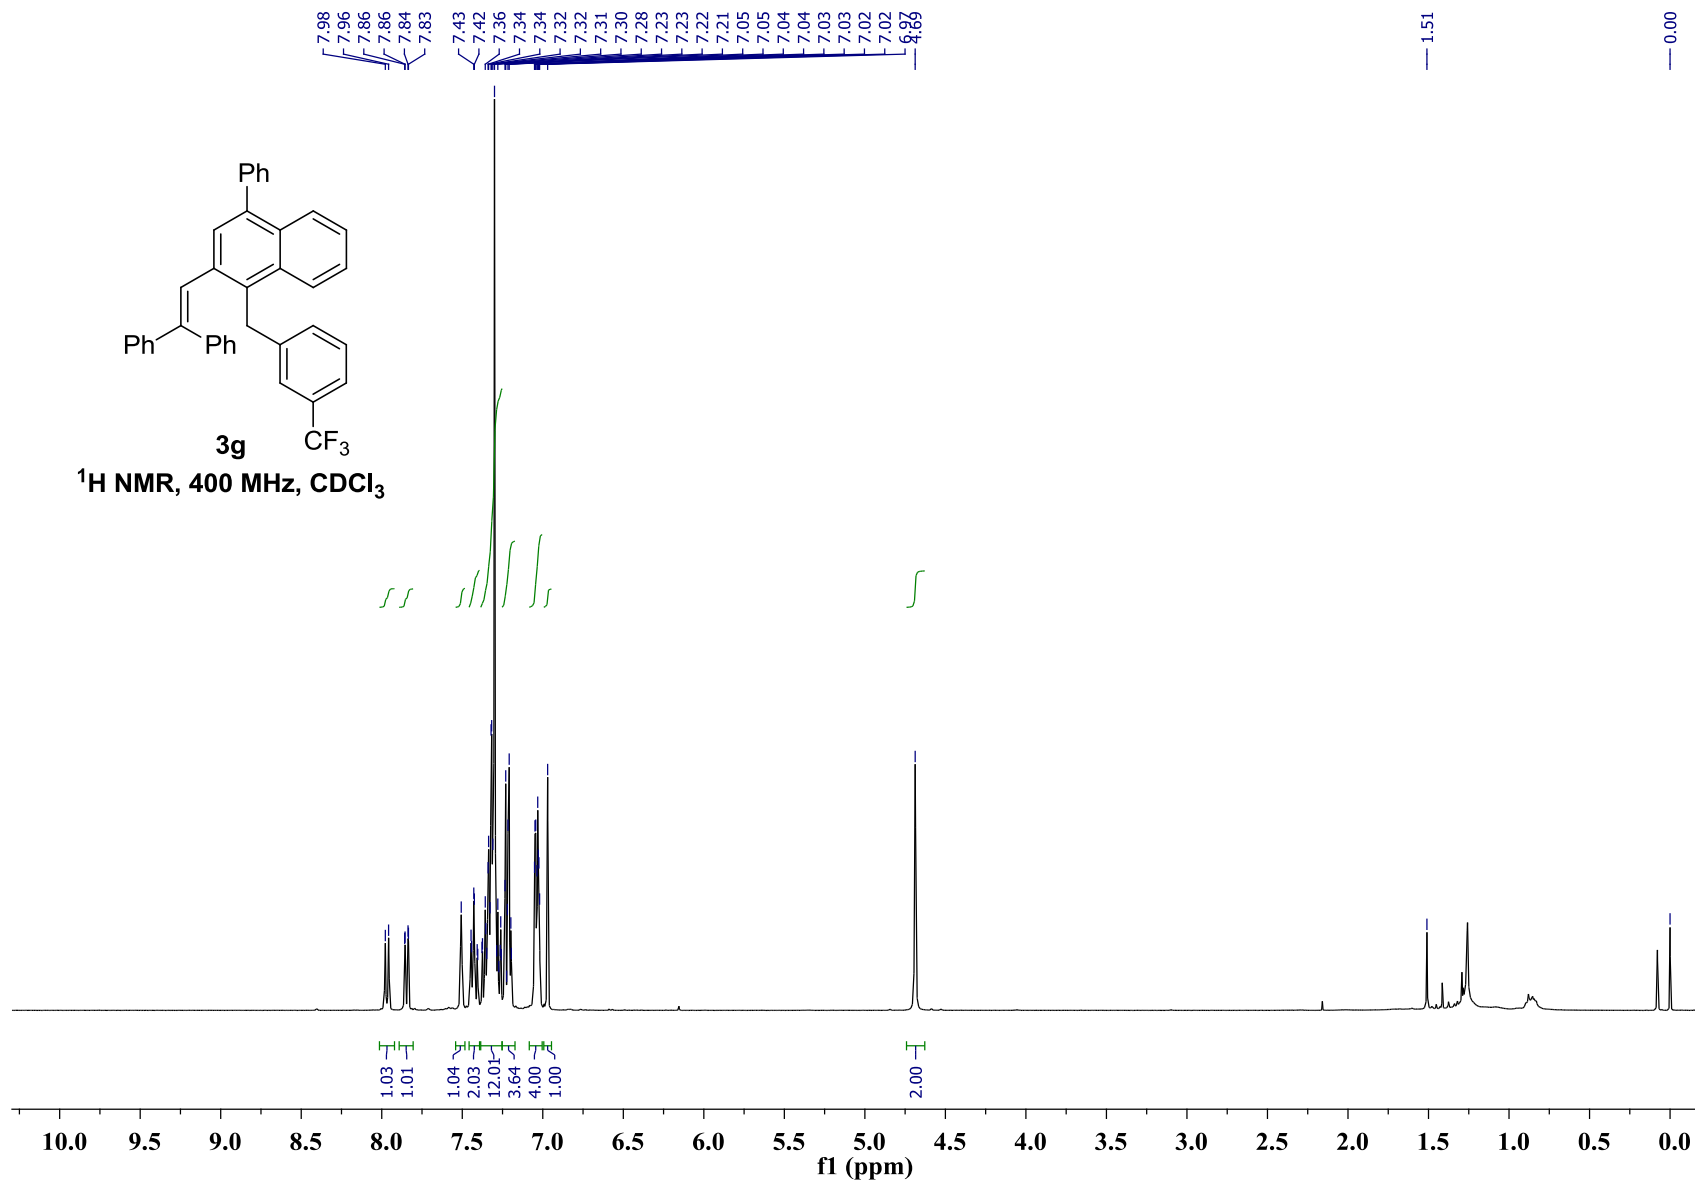

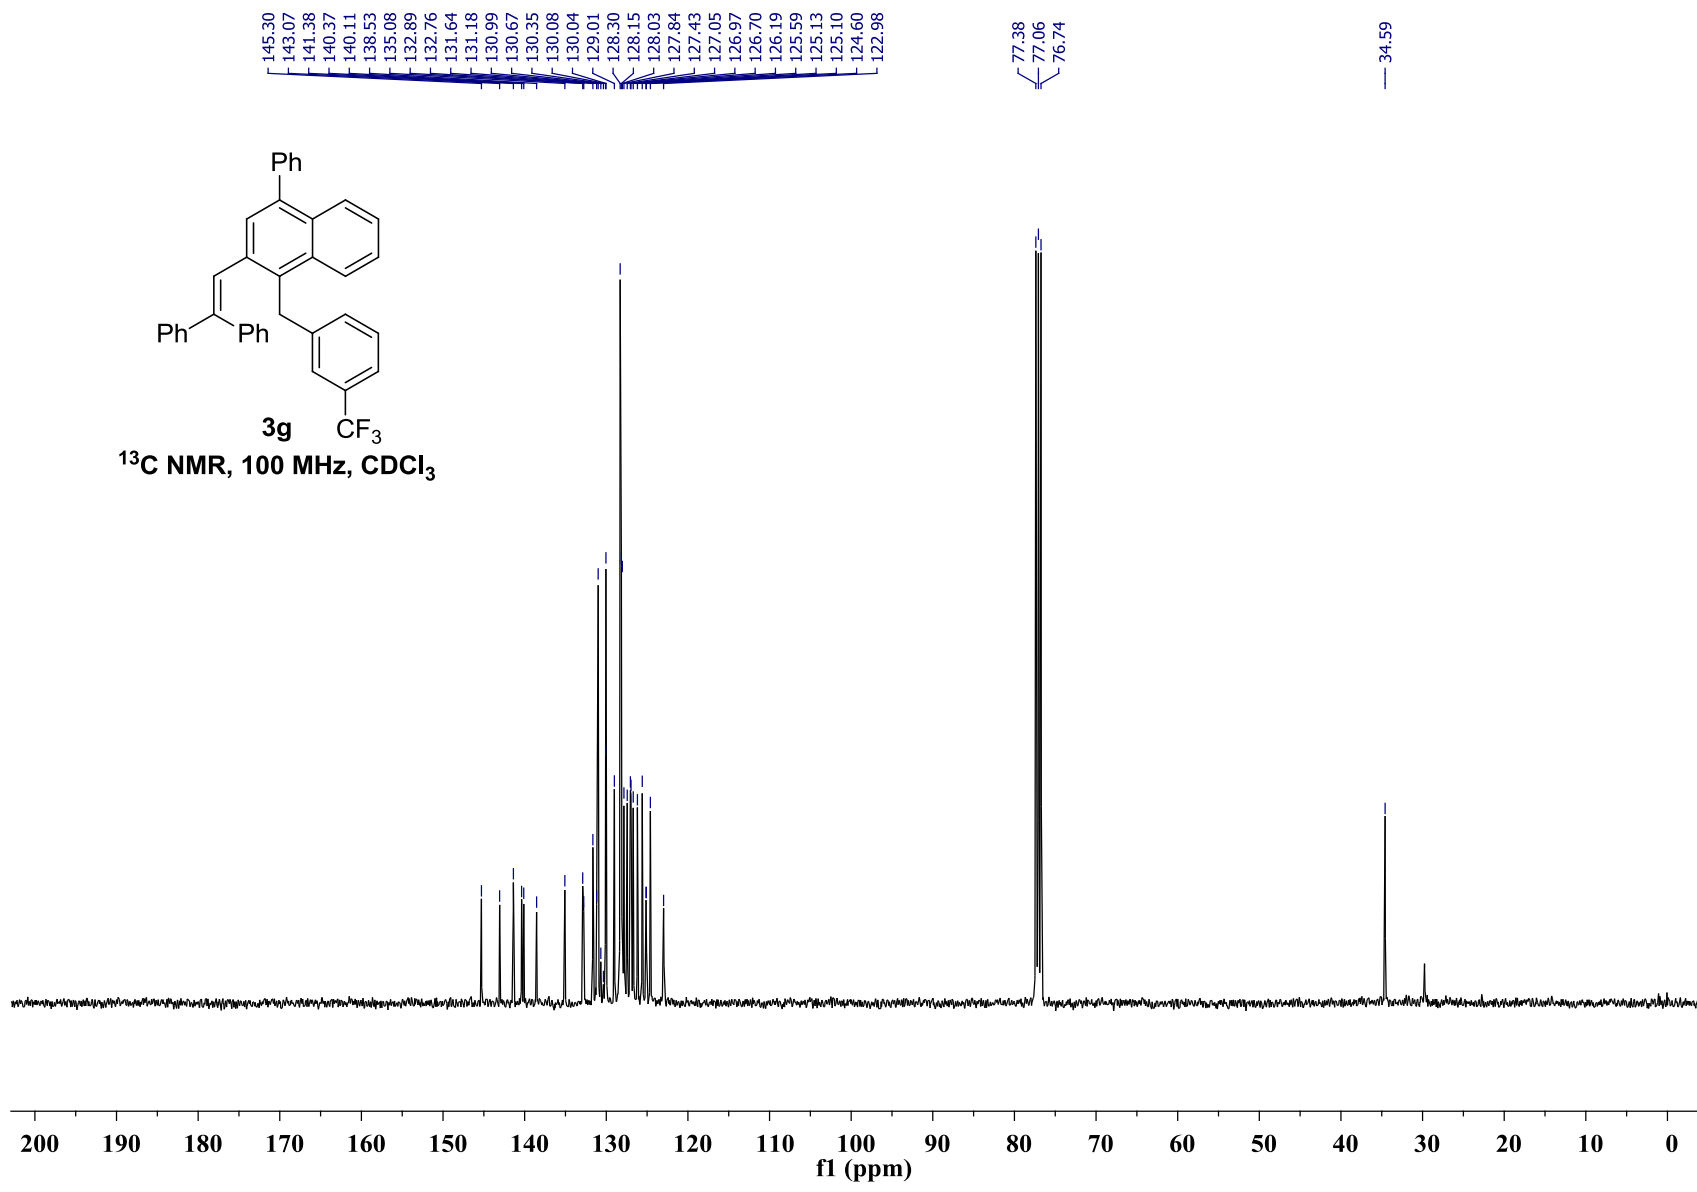



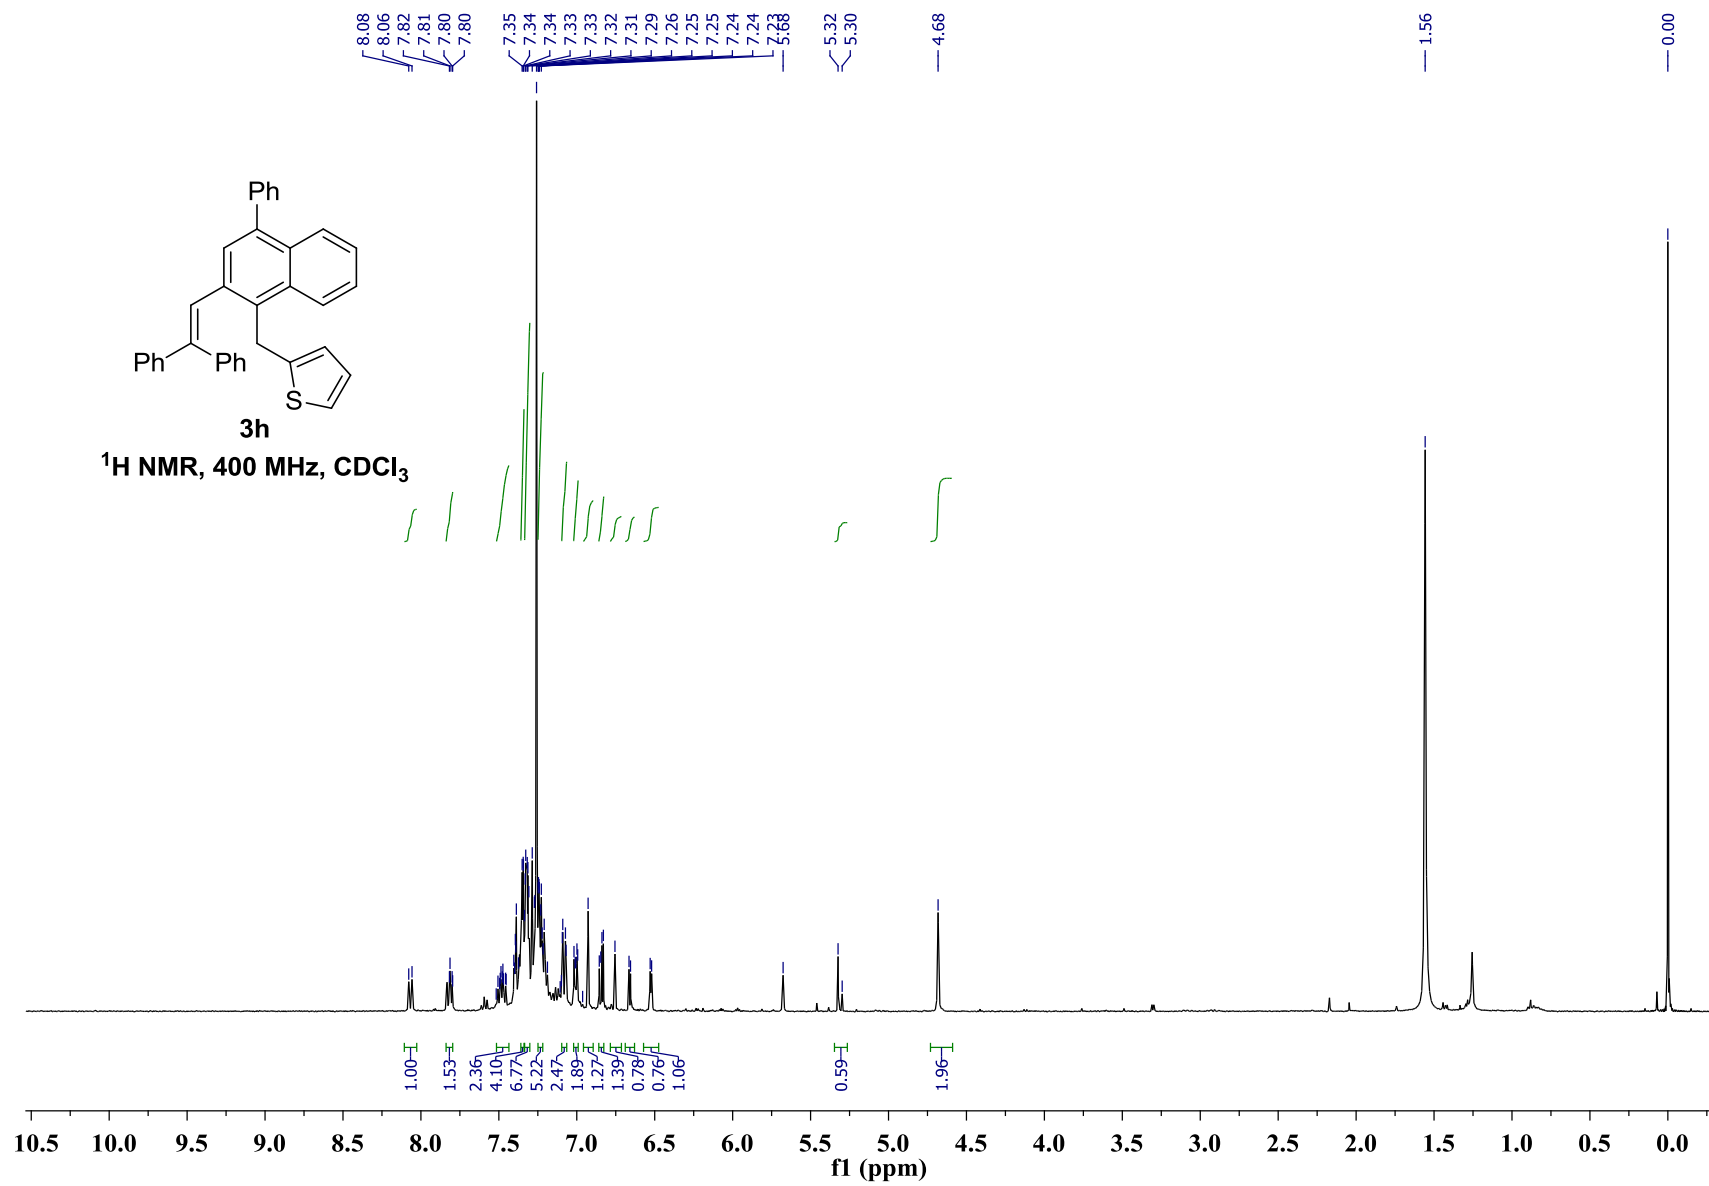



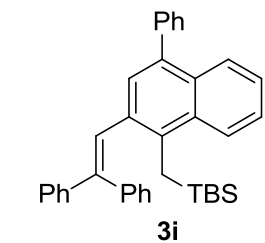

<sup>1</sup>H NMR, 500 MHz, CDCl<sub>3</sub>

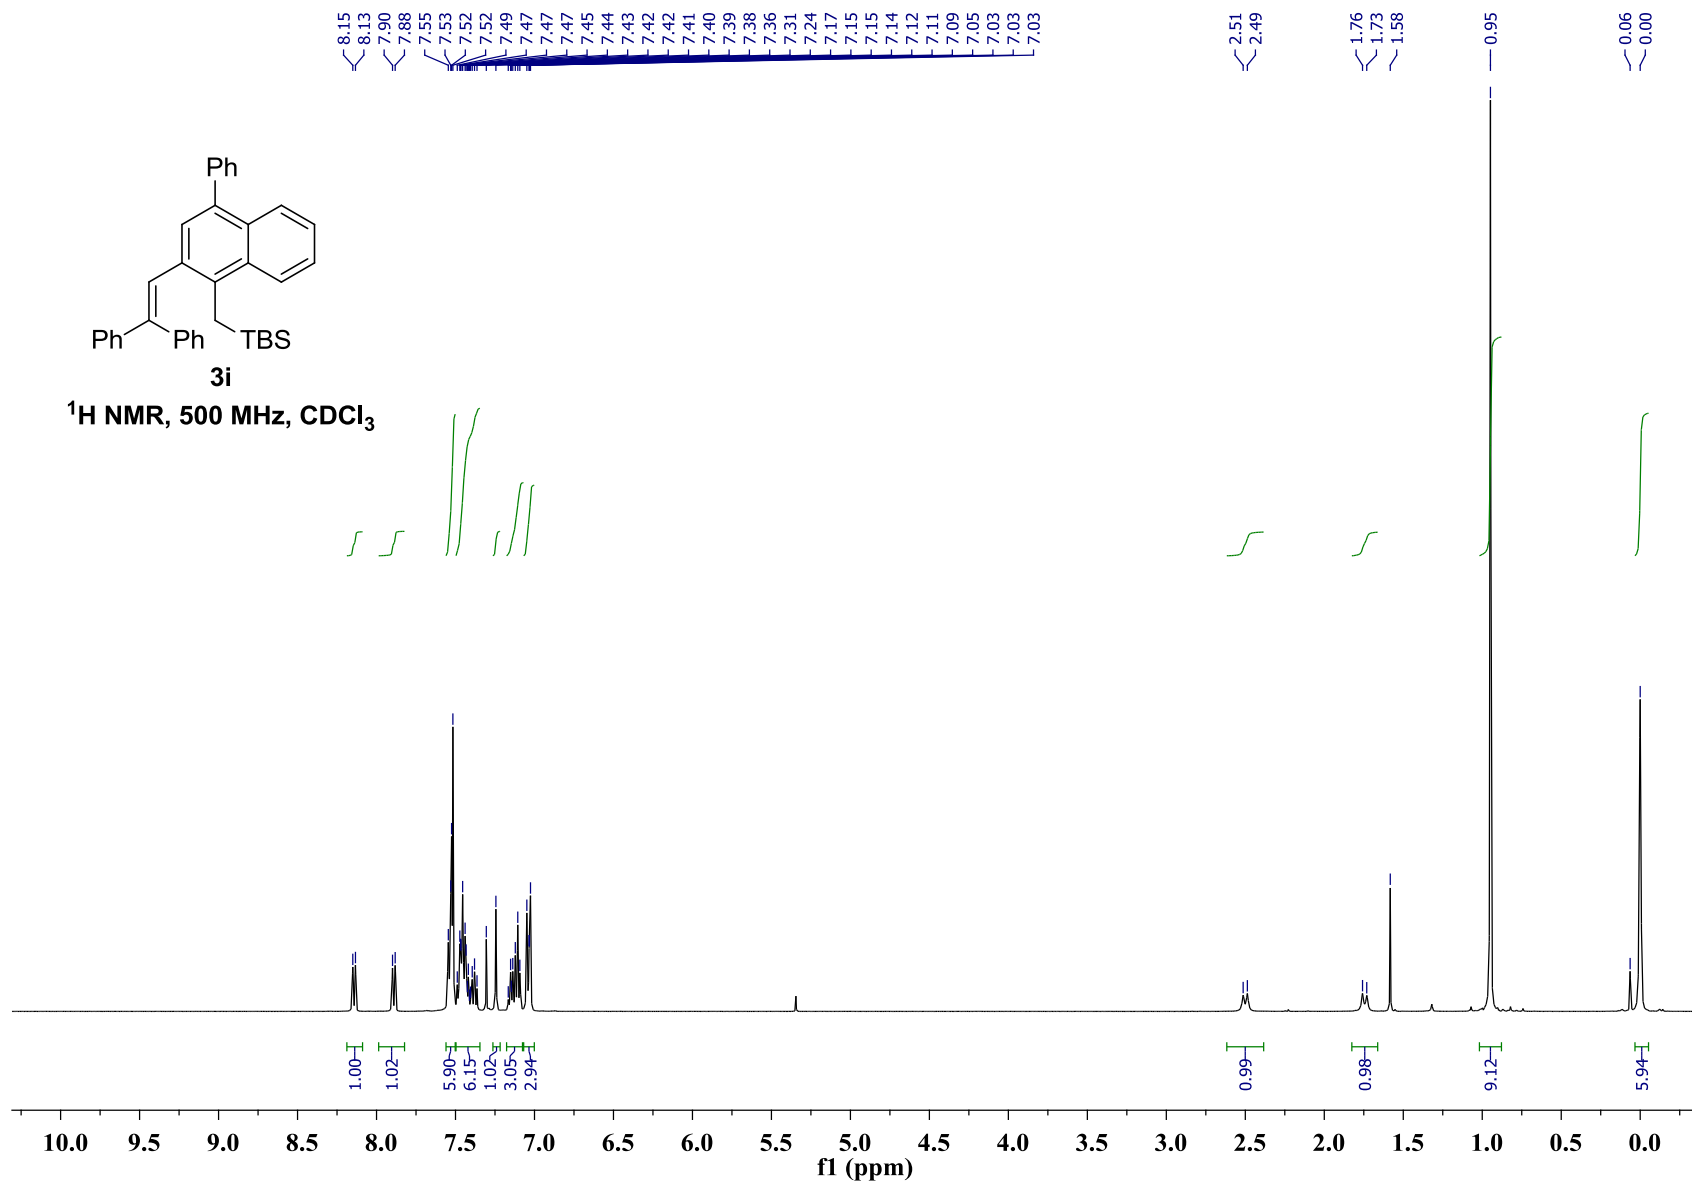

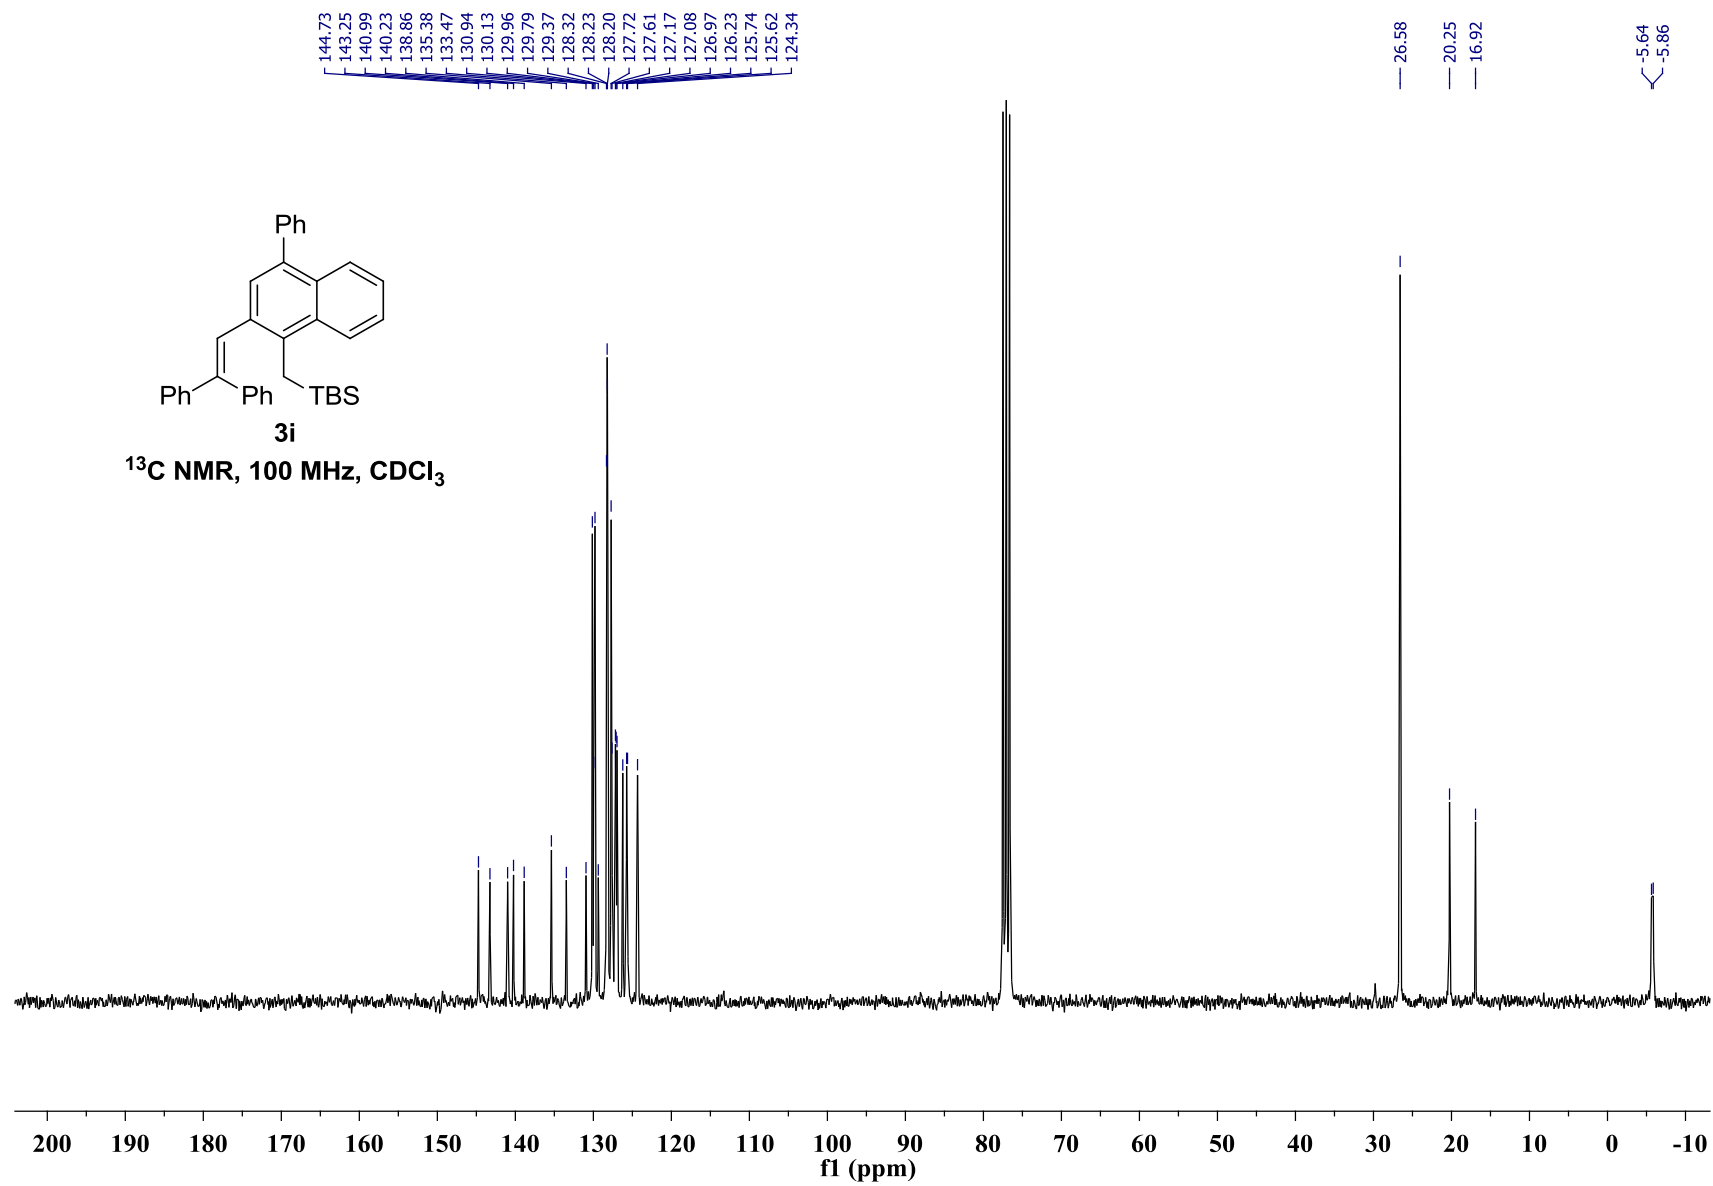

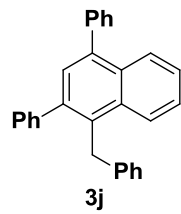

<sup>1</sup>H NMR, 500 MHz, CDCl<sub>3</sub>

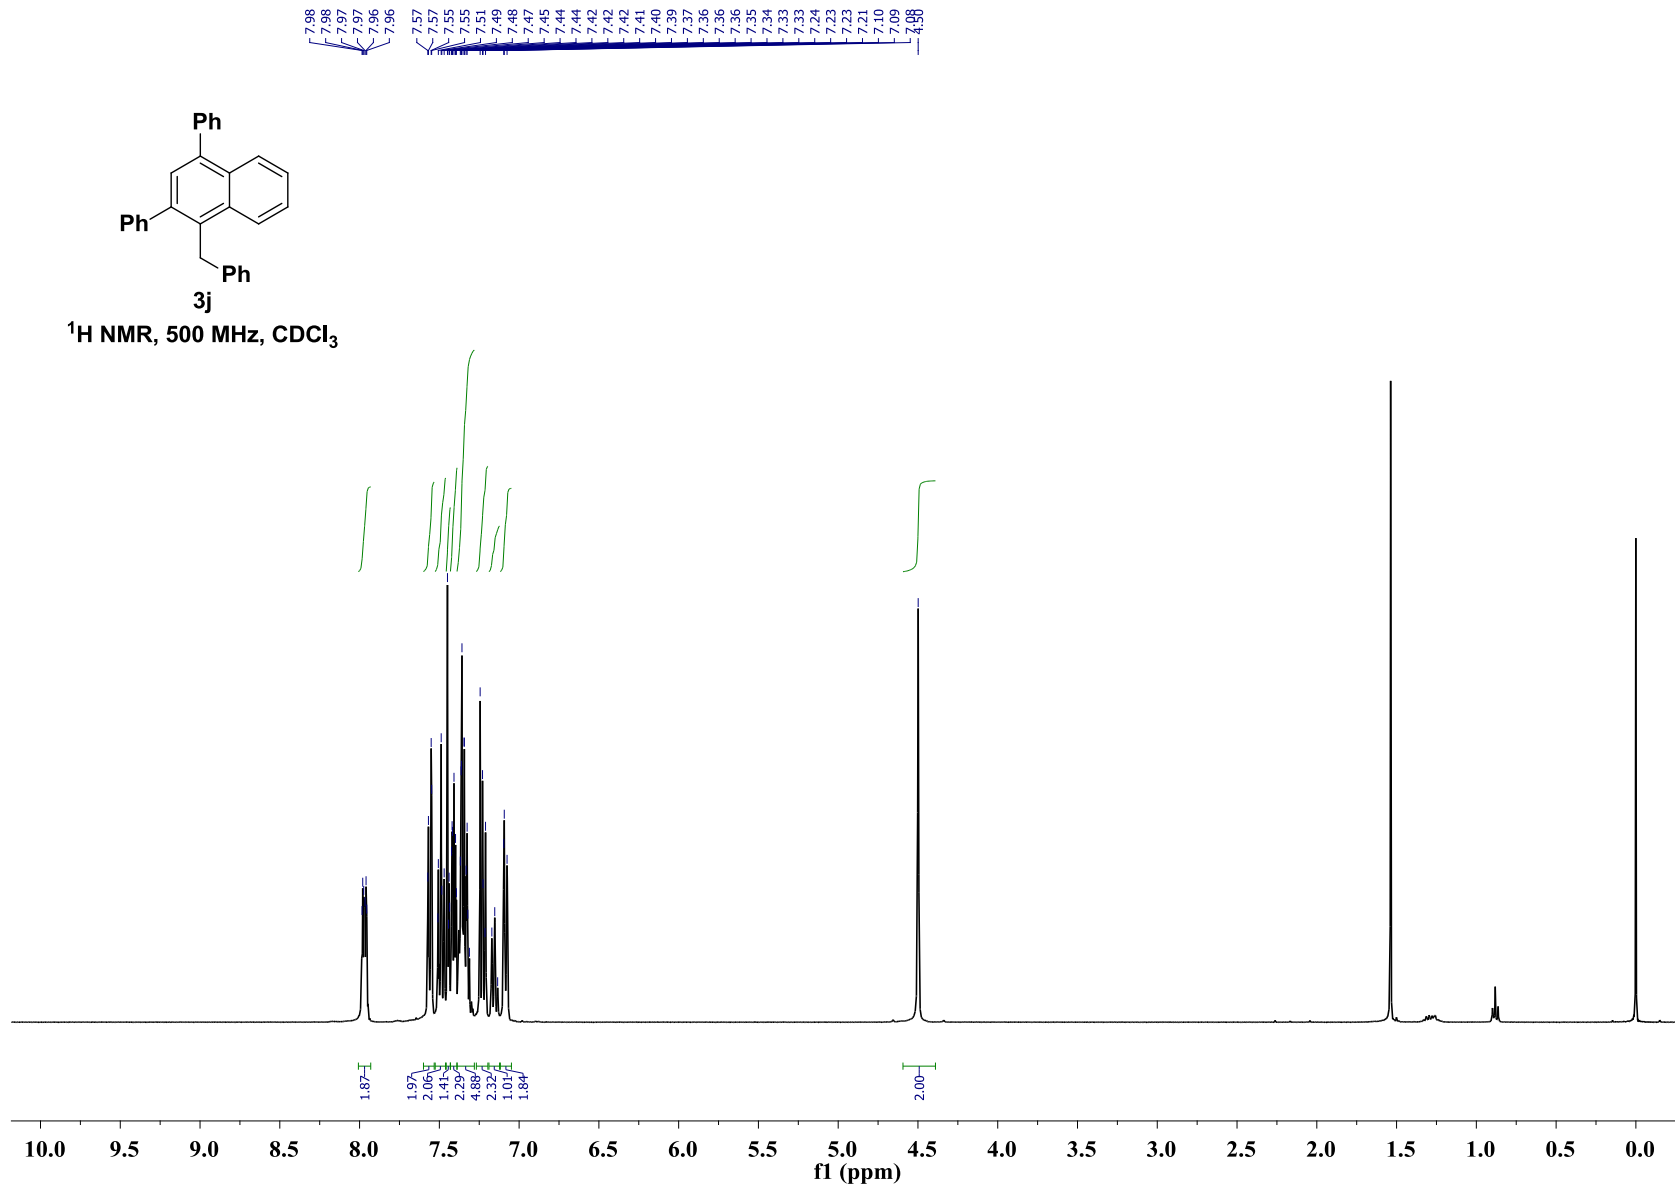

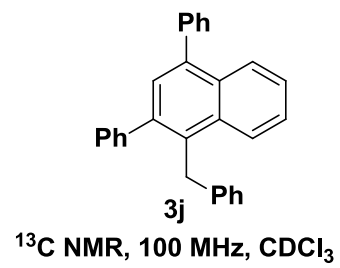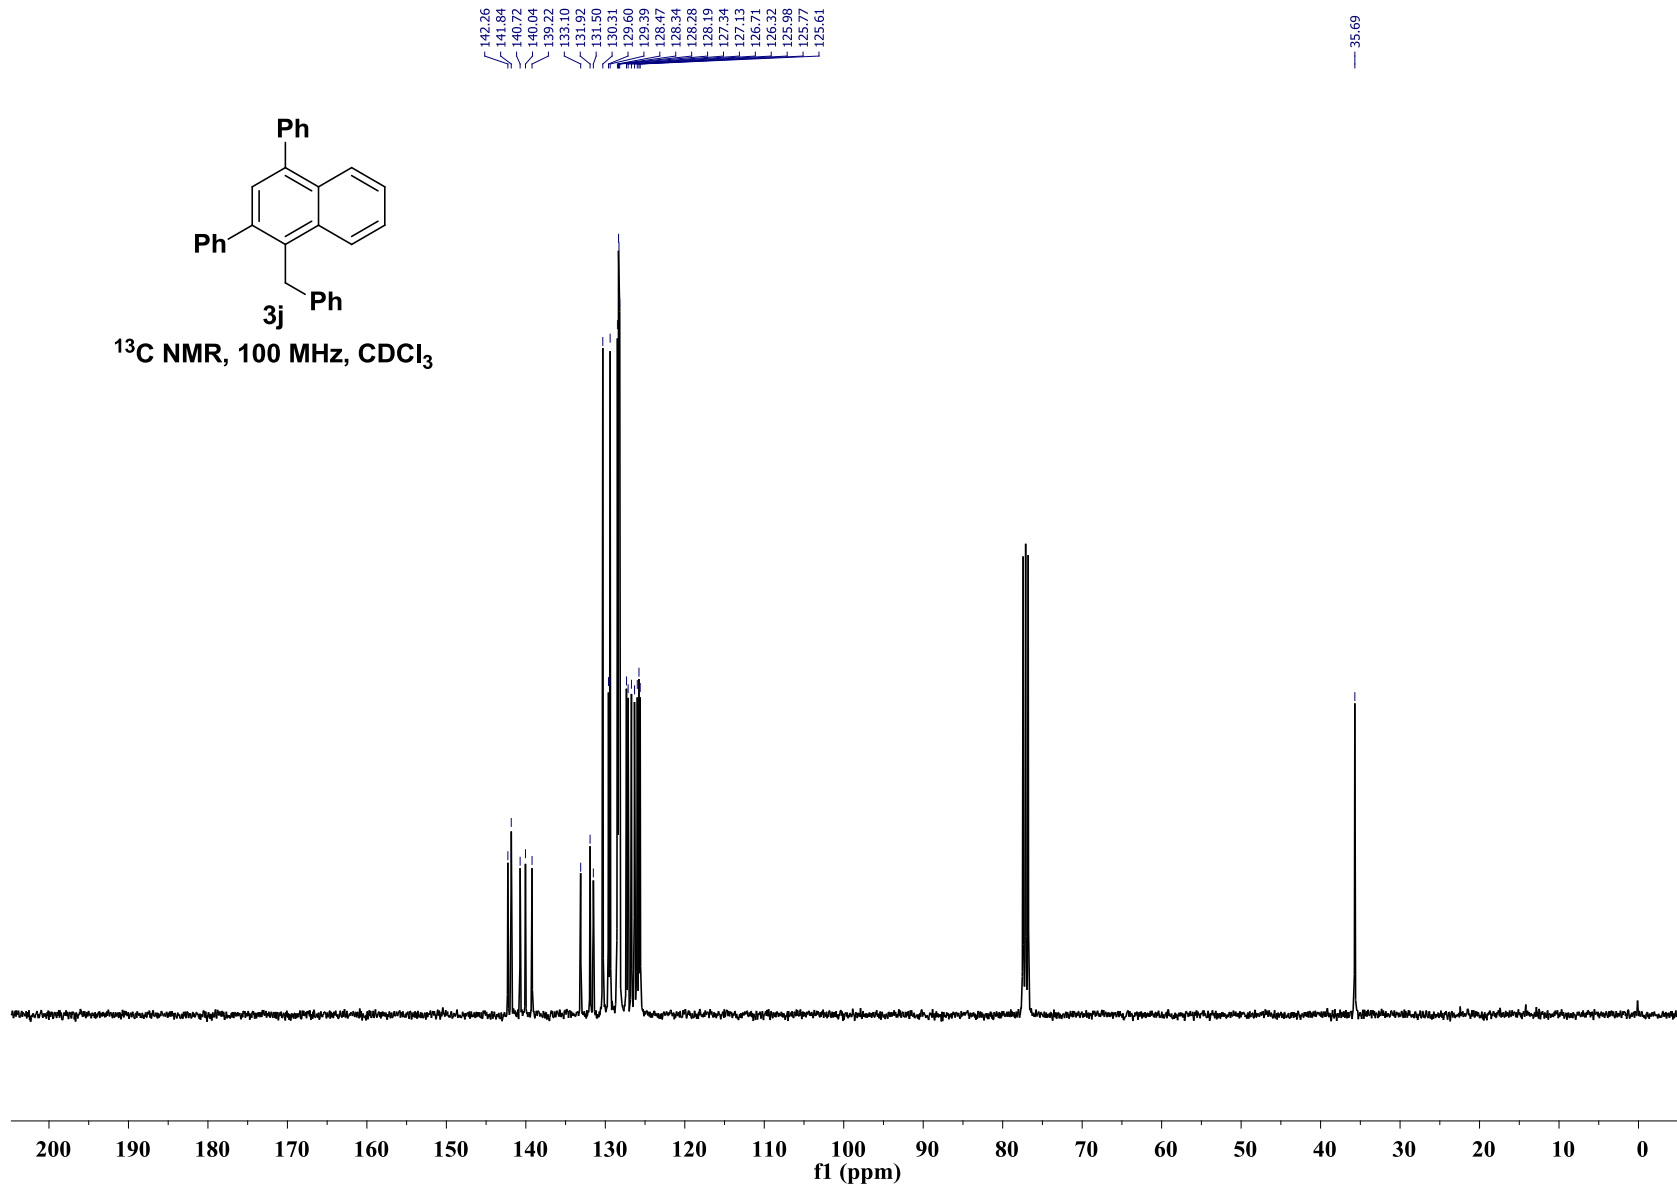

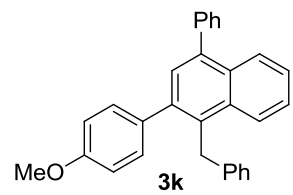

<sup>1</sup>H NMR, 500 MHz, CDCl<sub>3</sub>

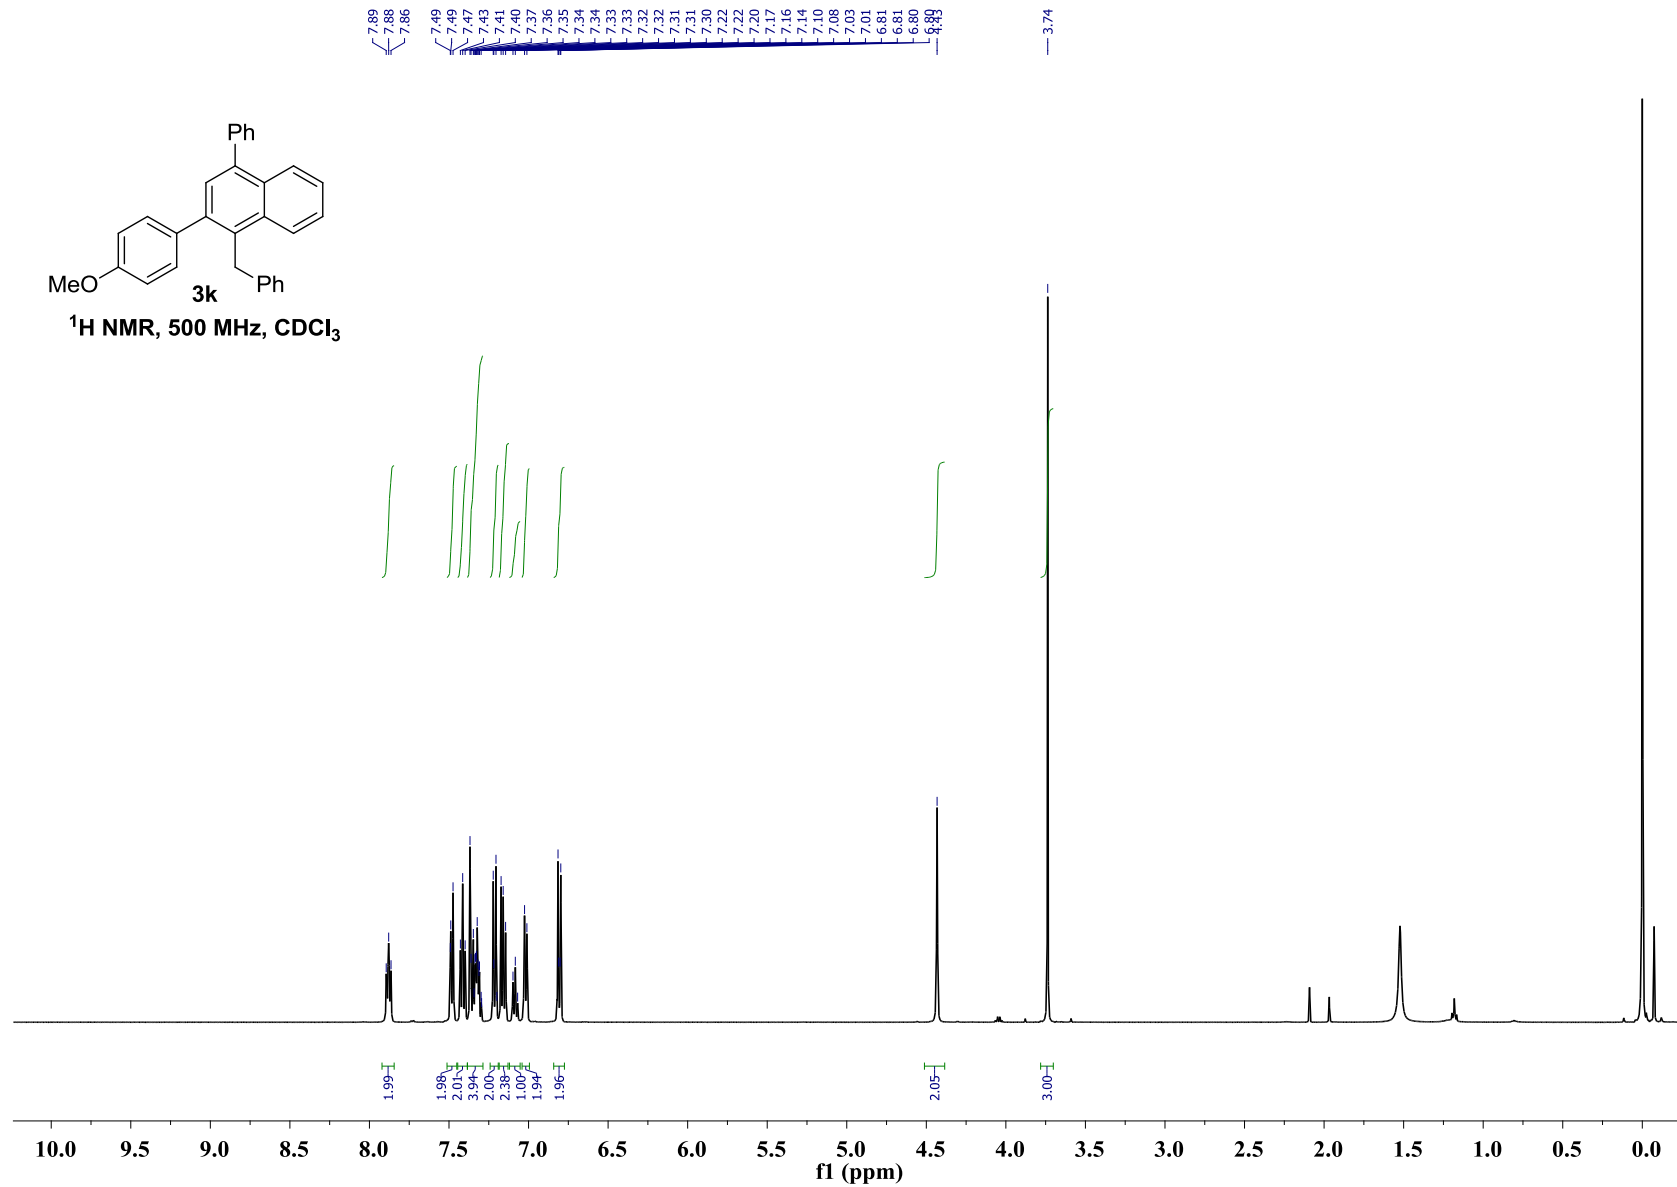

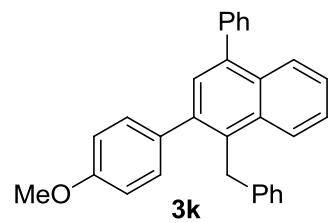

<sup>13</sup>C NMR, 125 MHz, CDCl<sub>3</sub>

- 158.81
- 141.90
- 139.65
- 139.16
- 134.61
- 131.89
- 130.46
- 130.30
- 129.82
- 128.48
- 128.32
- 128.28
- 127.30
- 126.67
- 126.27
- 125.93
- 125.75
- 115.62
- 55.34
- 35.71

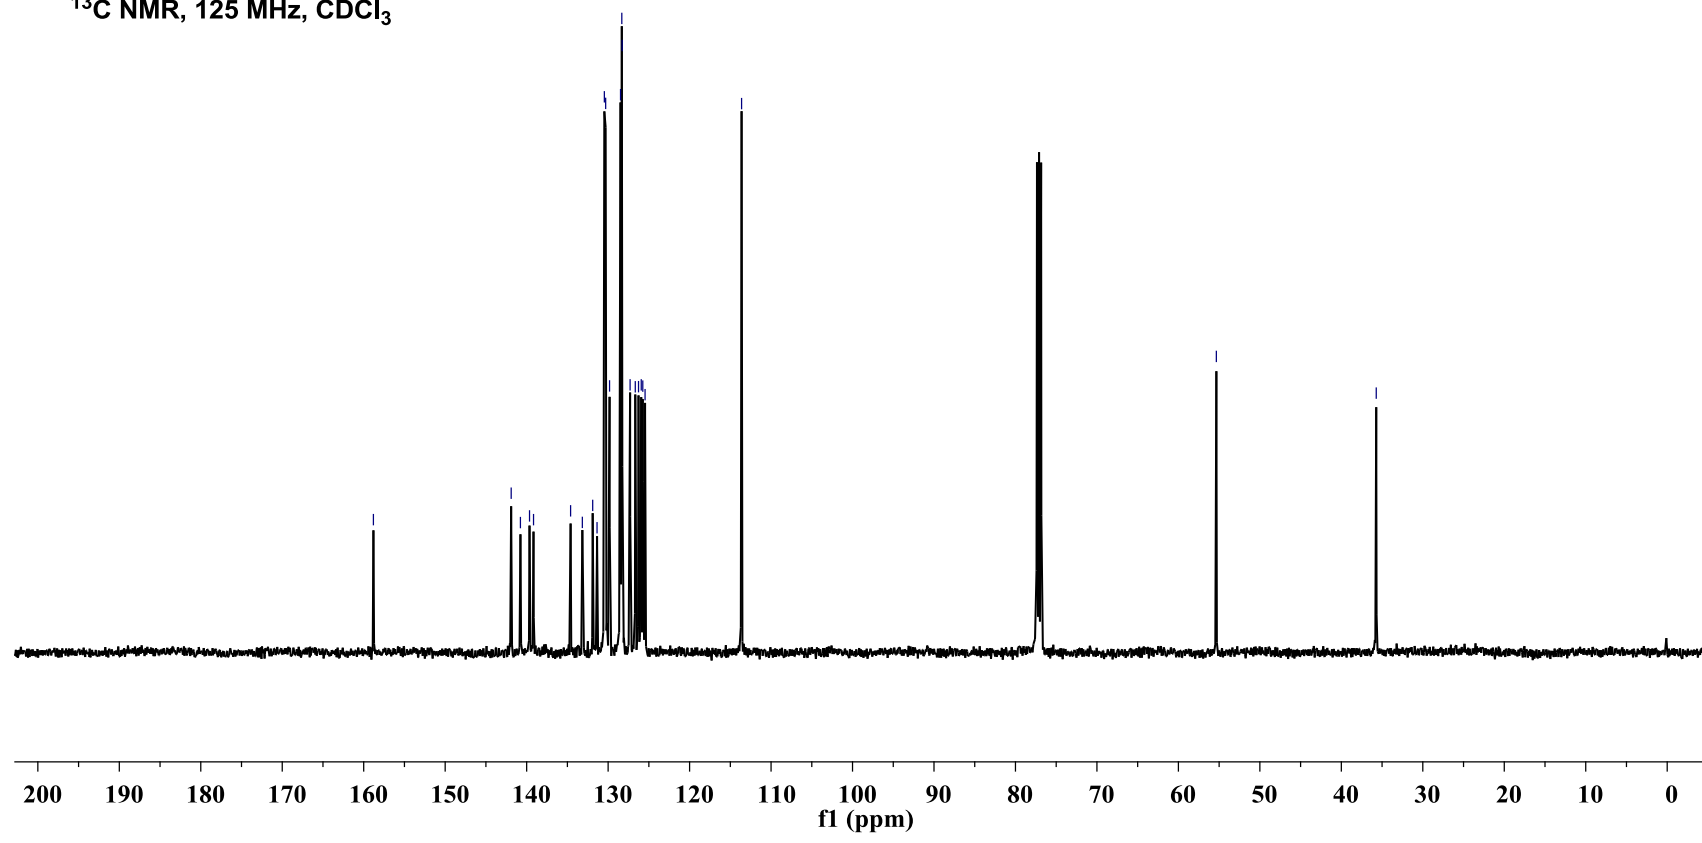



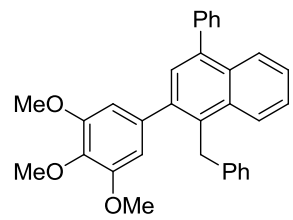

**3I**  
**<sup>1</sup>H NMR, 500 MHz, CDCl<sub>3</sub>**

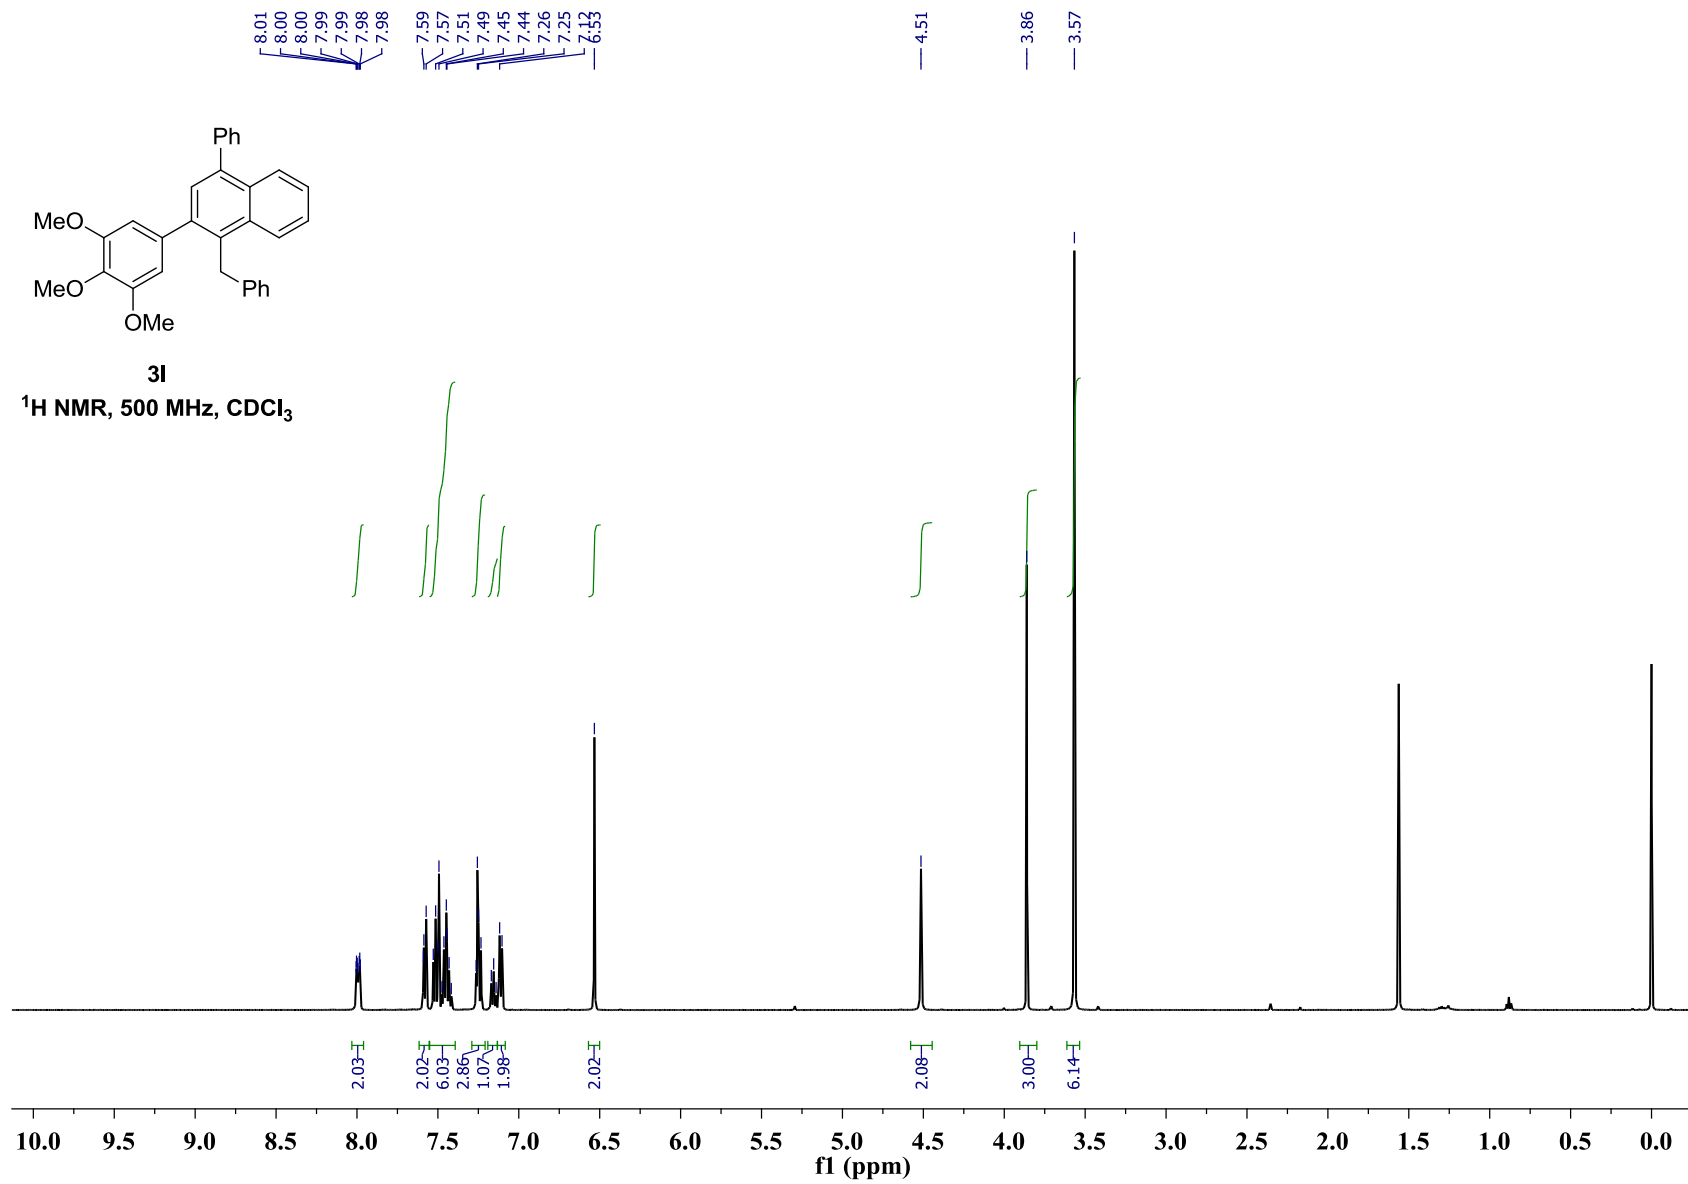

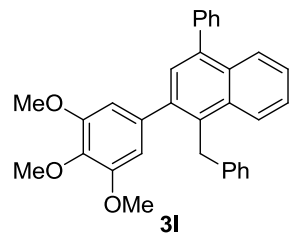

<sup>13</sup>C NMR, 125 MHz, CDCl<sub>3</sub>

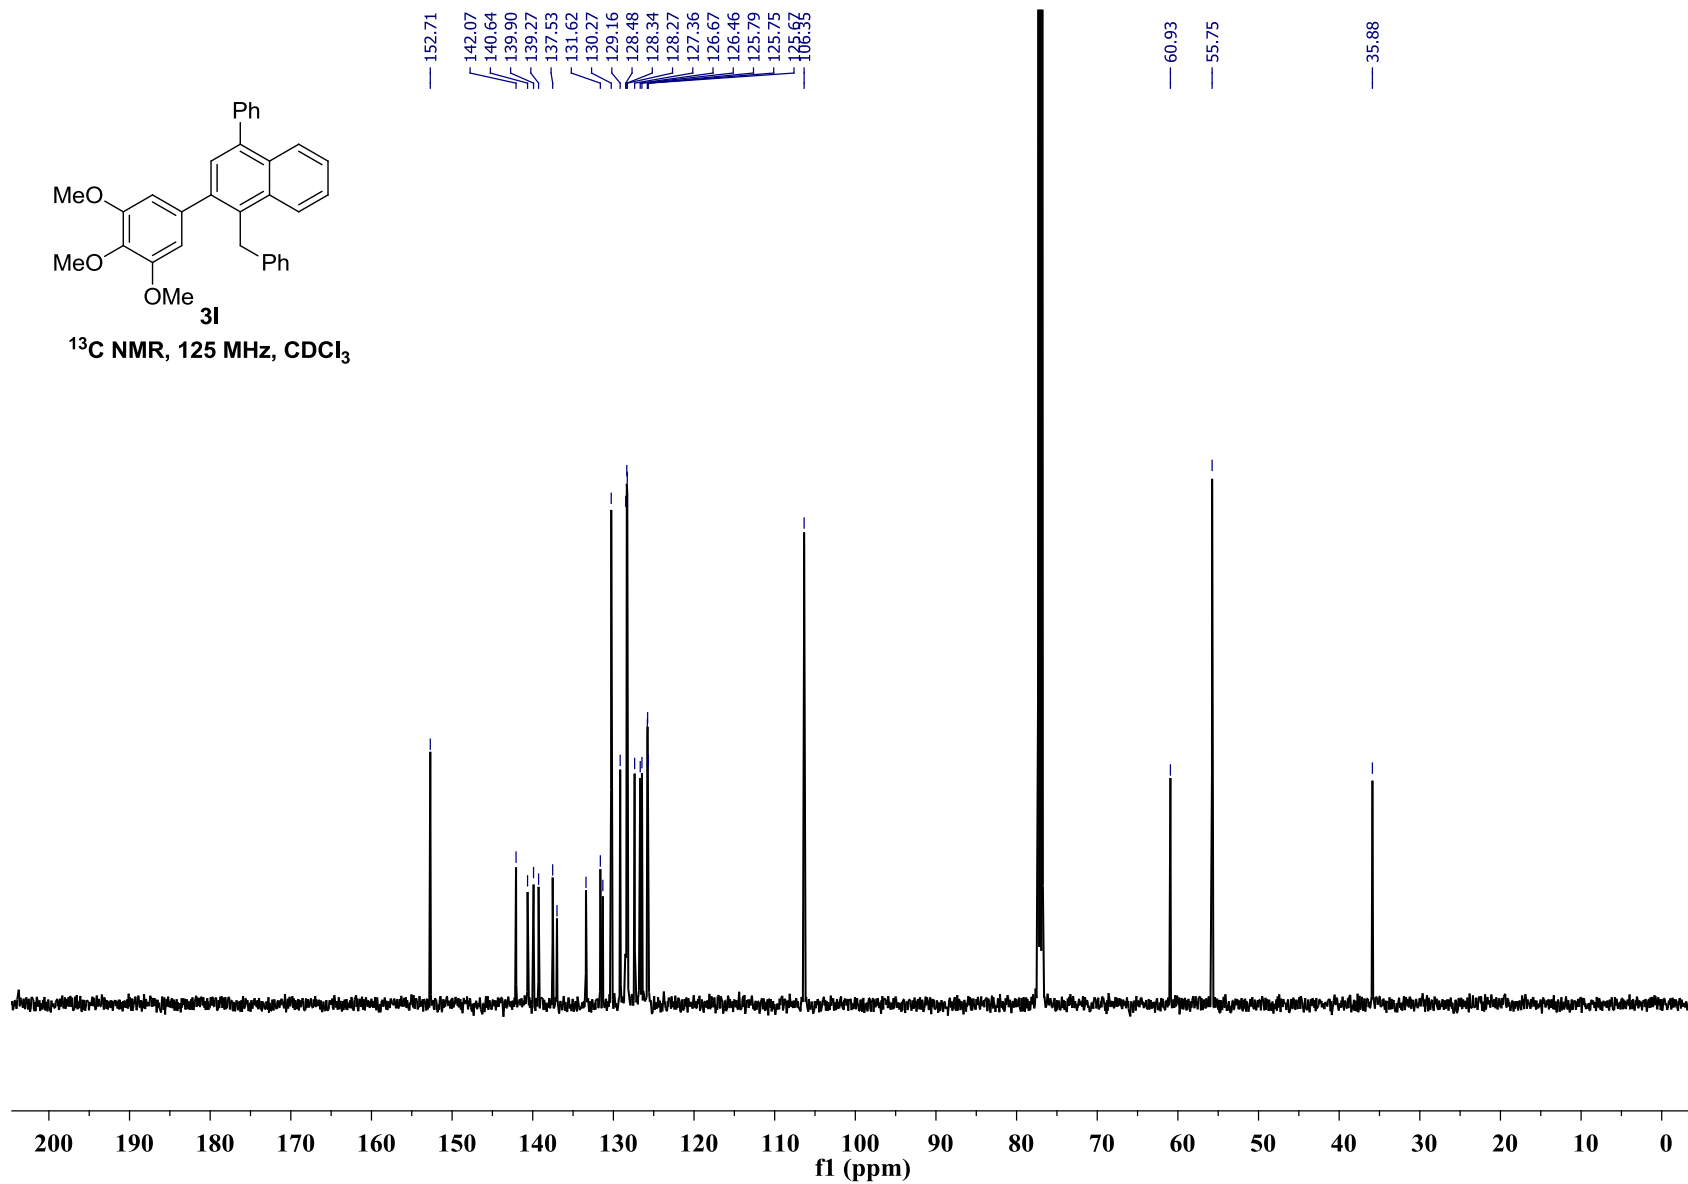

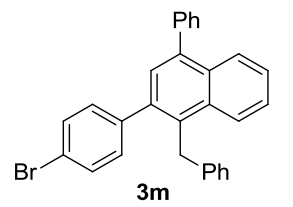

<sup>1</sup>H NMR, 500 MHz, CDCl<sub>3</sub>

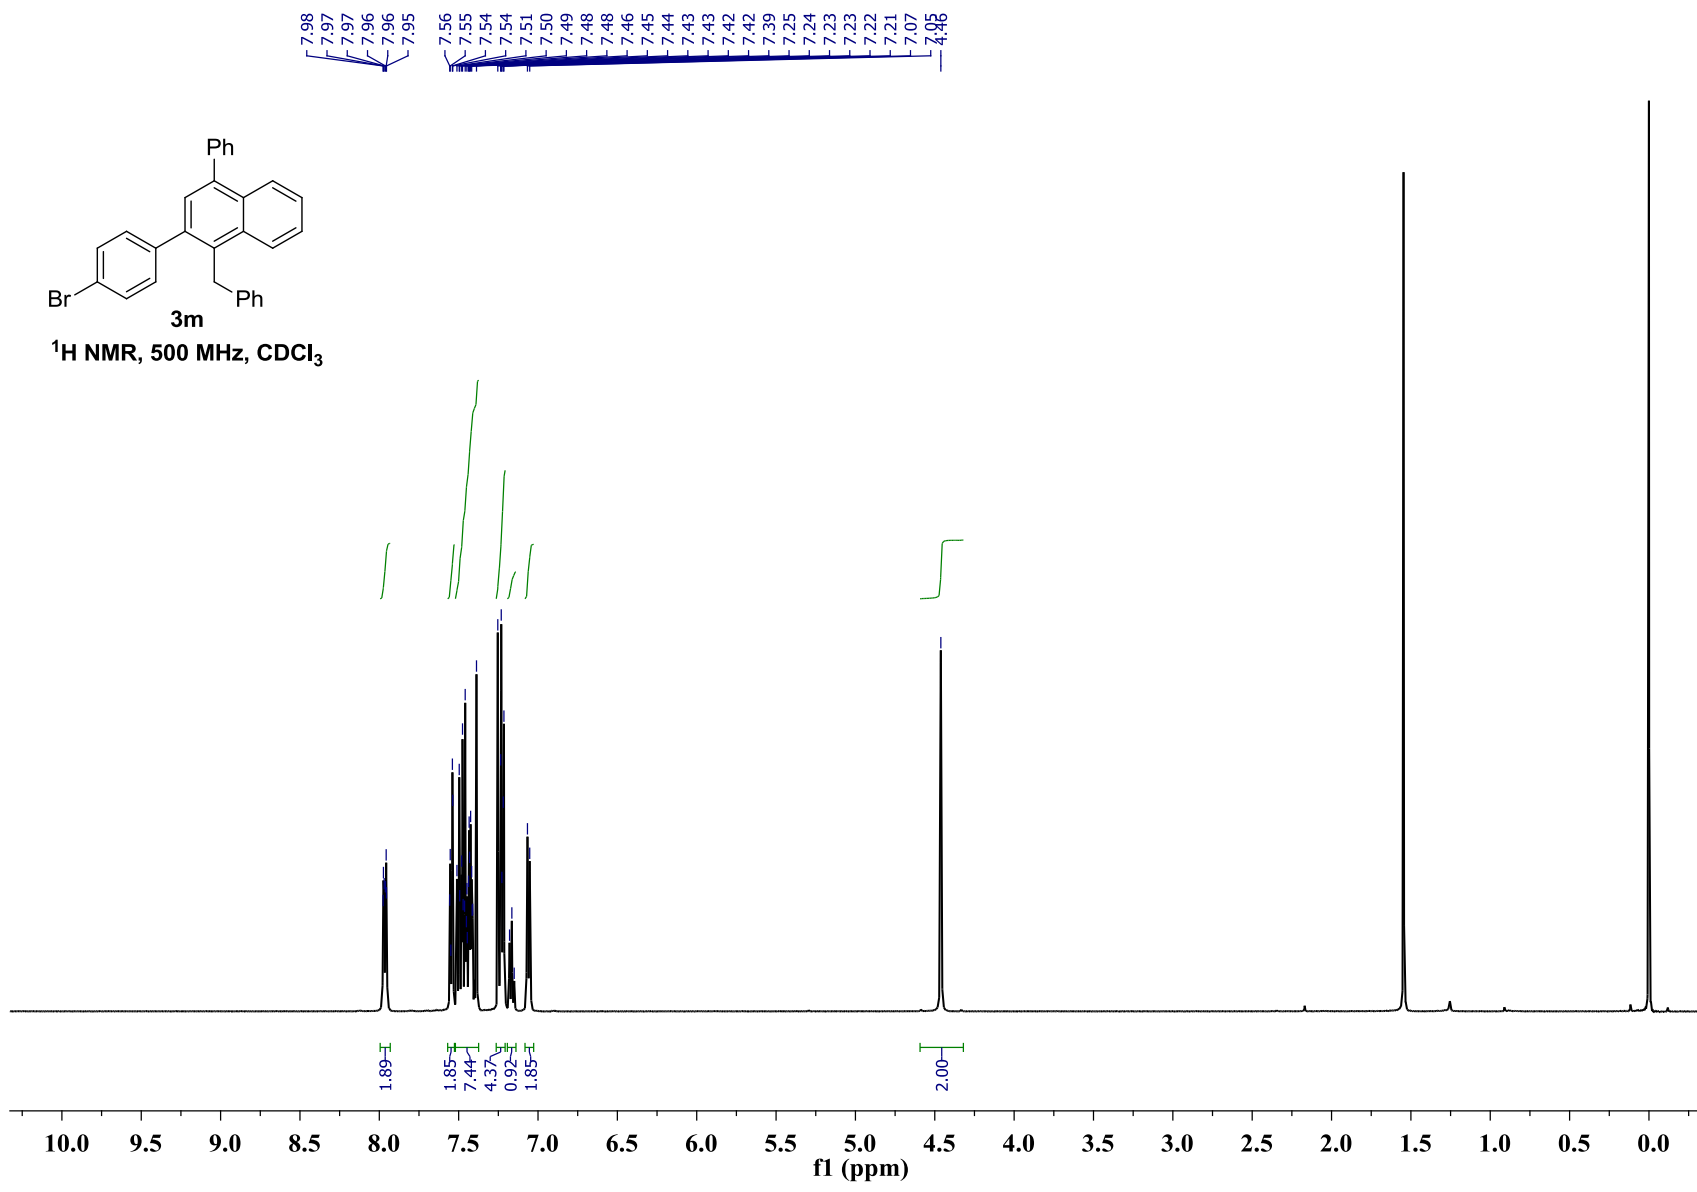

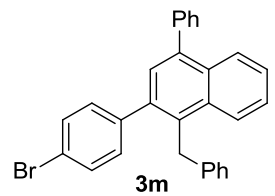

$^{13}\text{C}$  NMR, 125 MHz,  $\text{CDCl}_3$

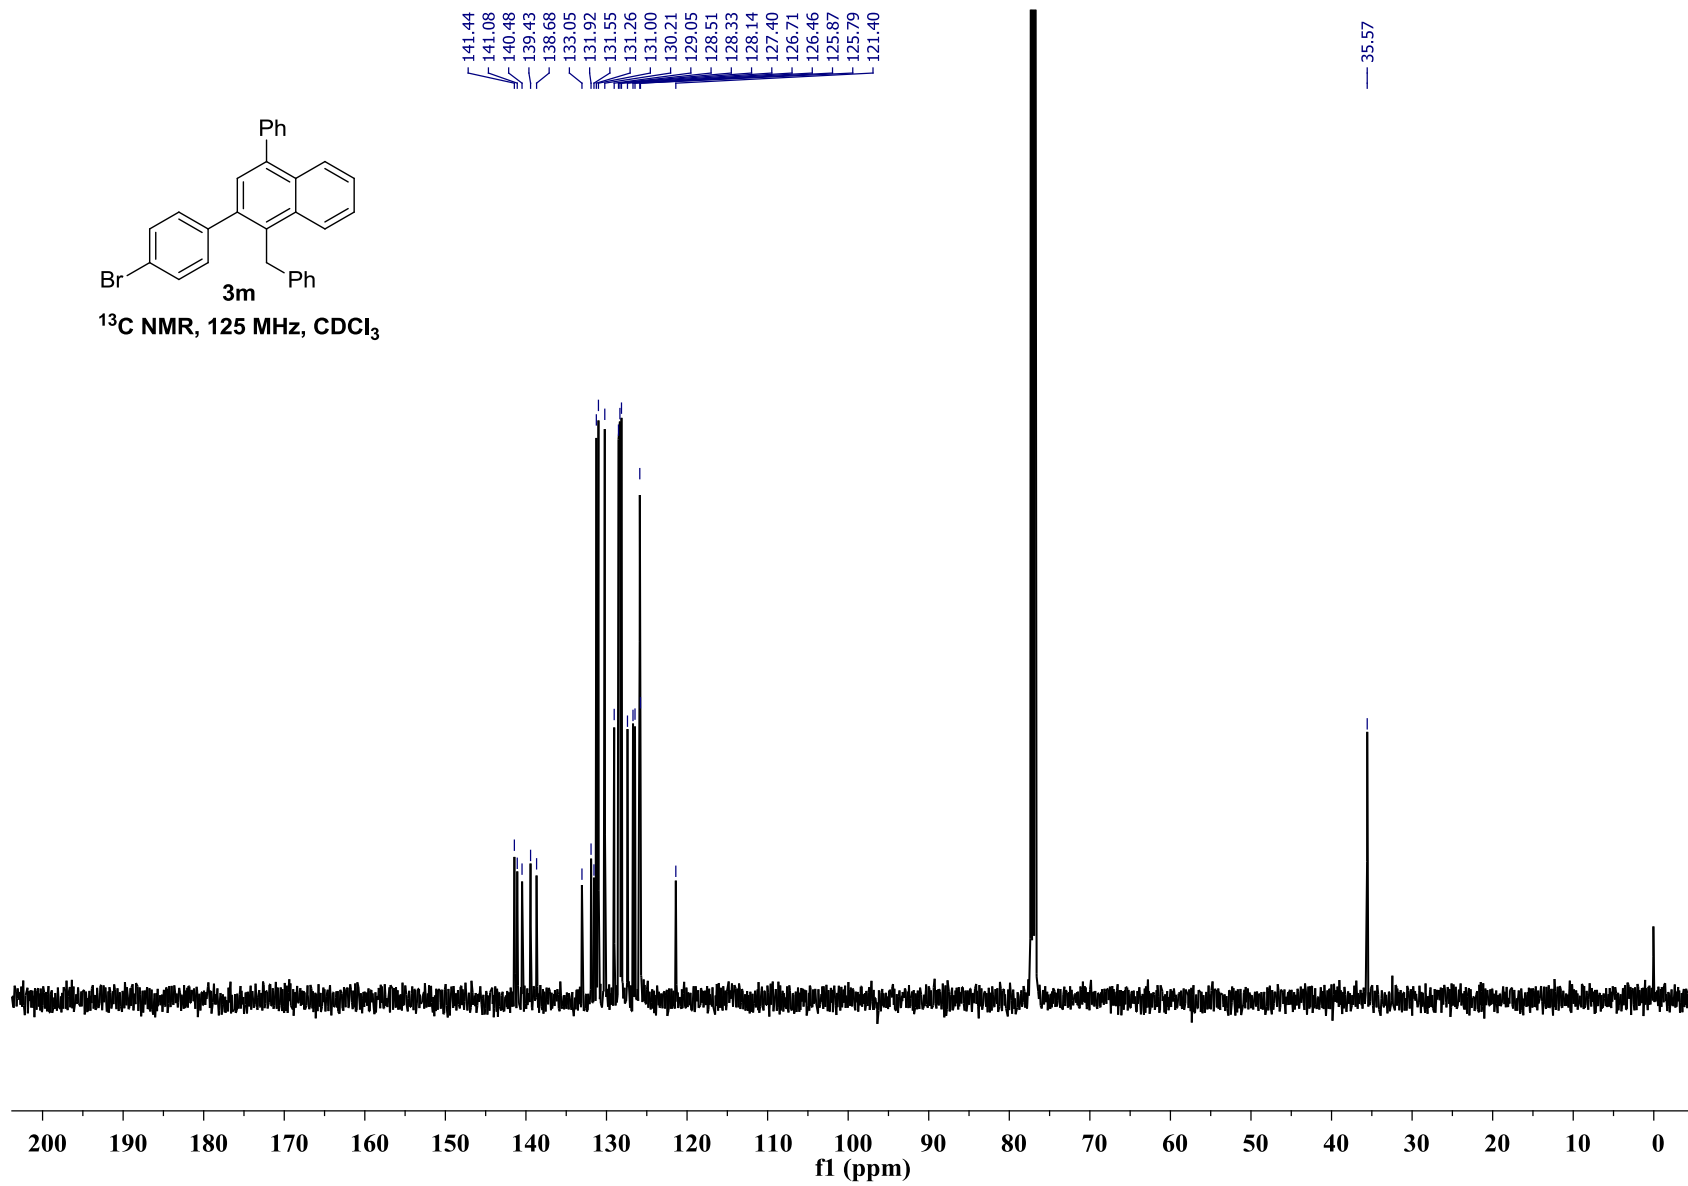

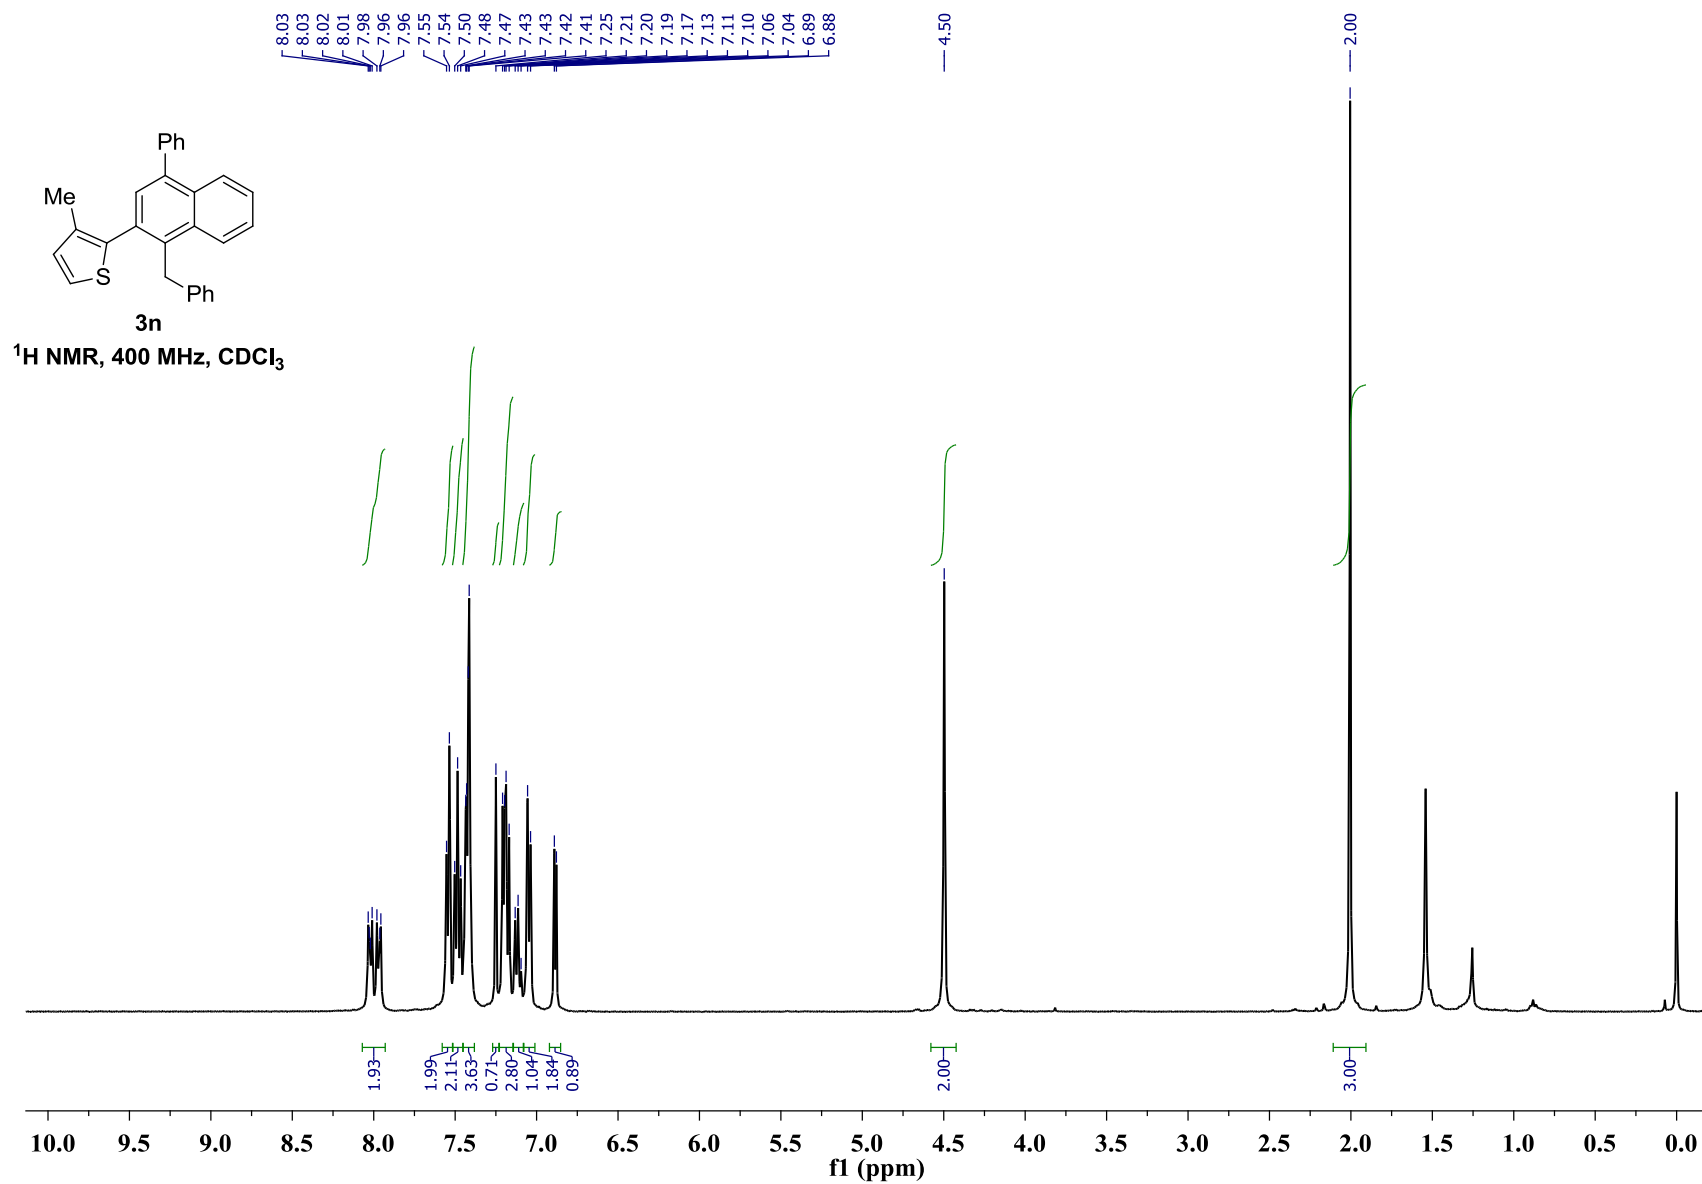

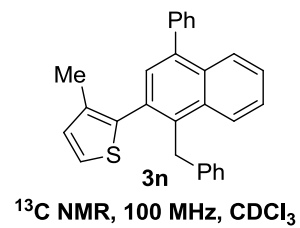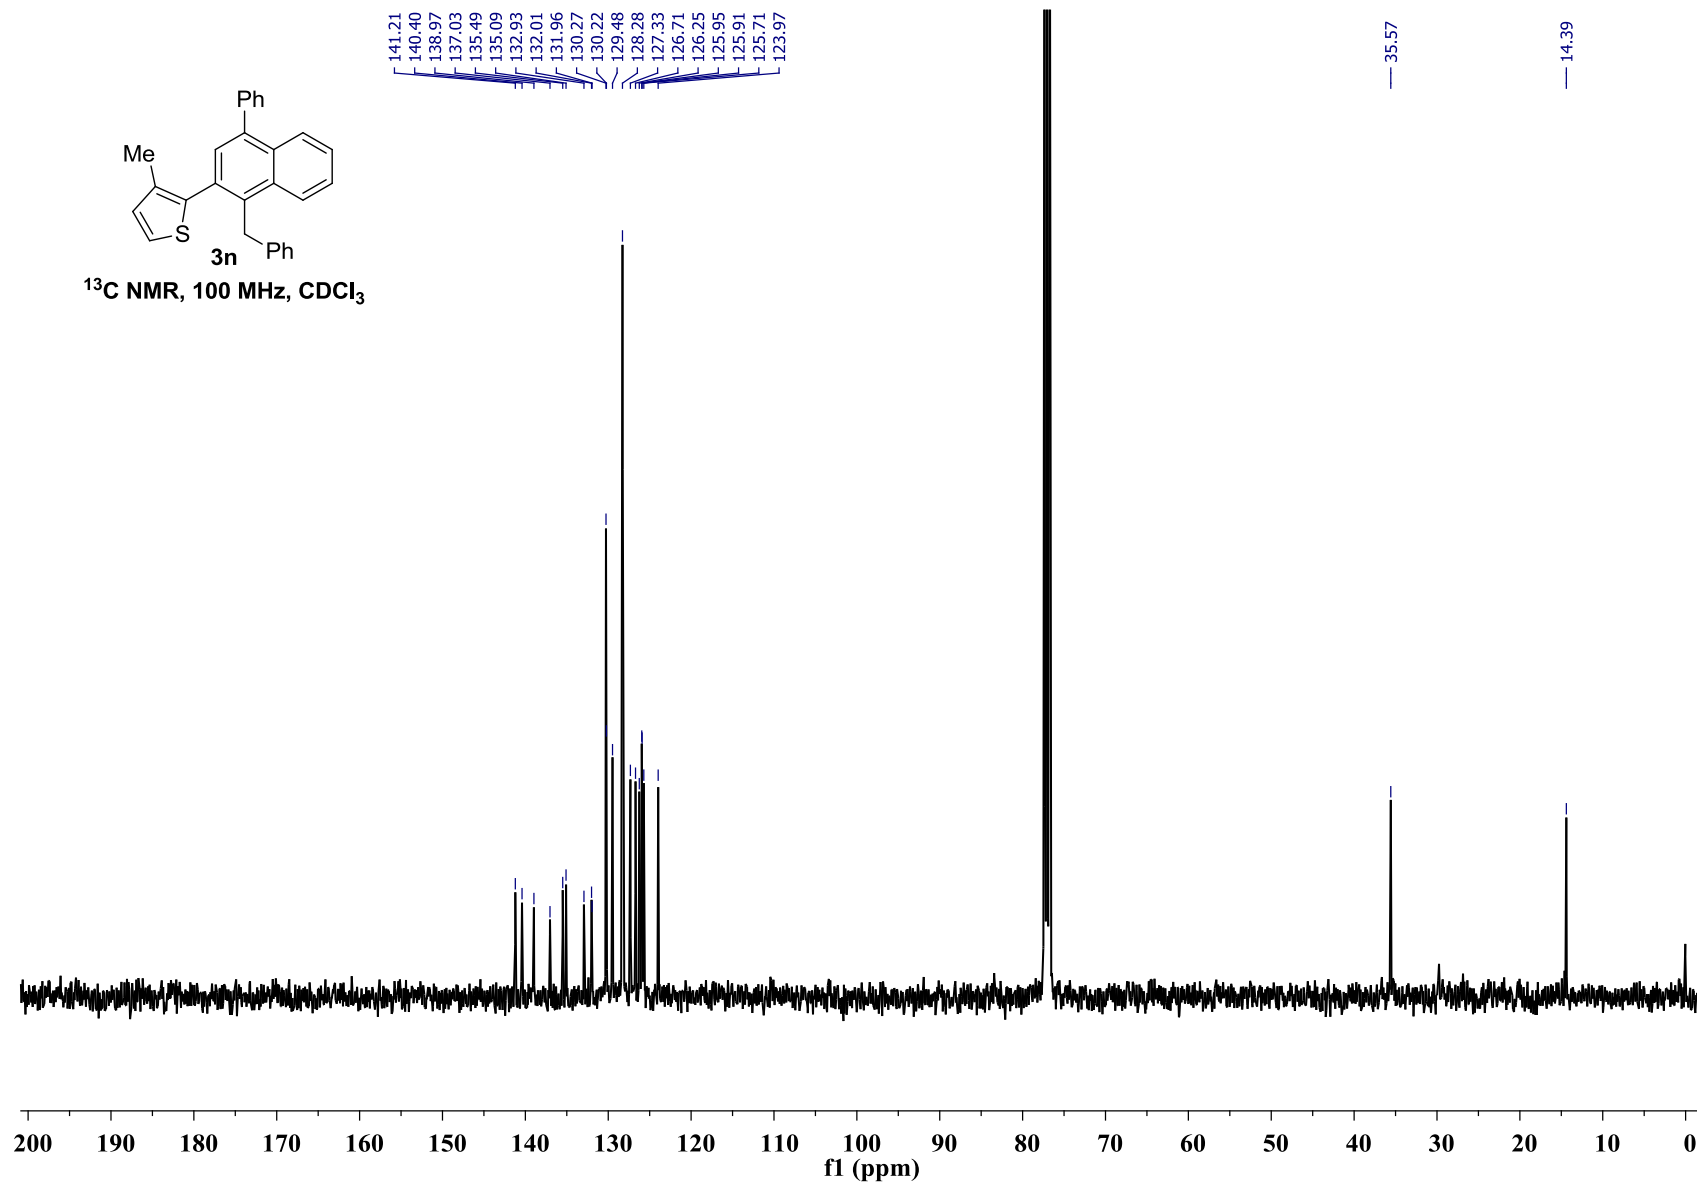

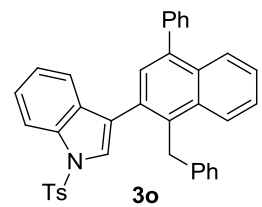

<sup>1</sup>H NMR, 500 MHz, CDCl<sub>3</sub>

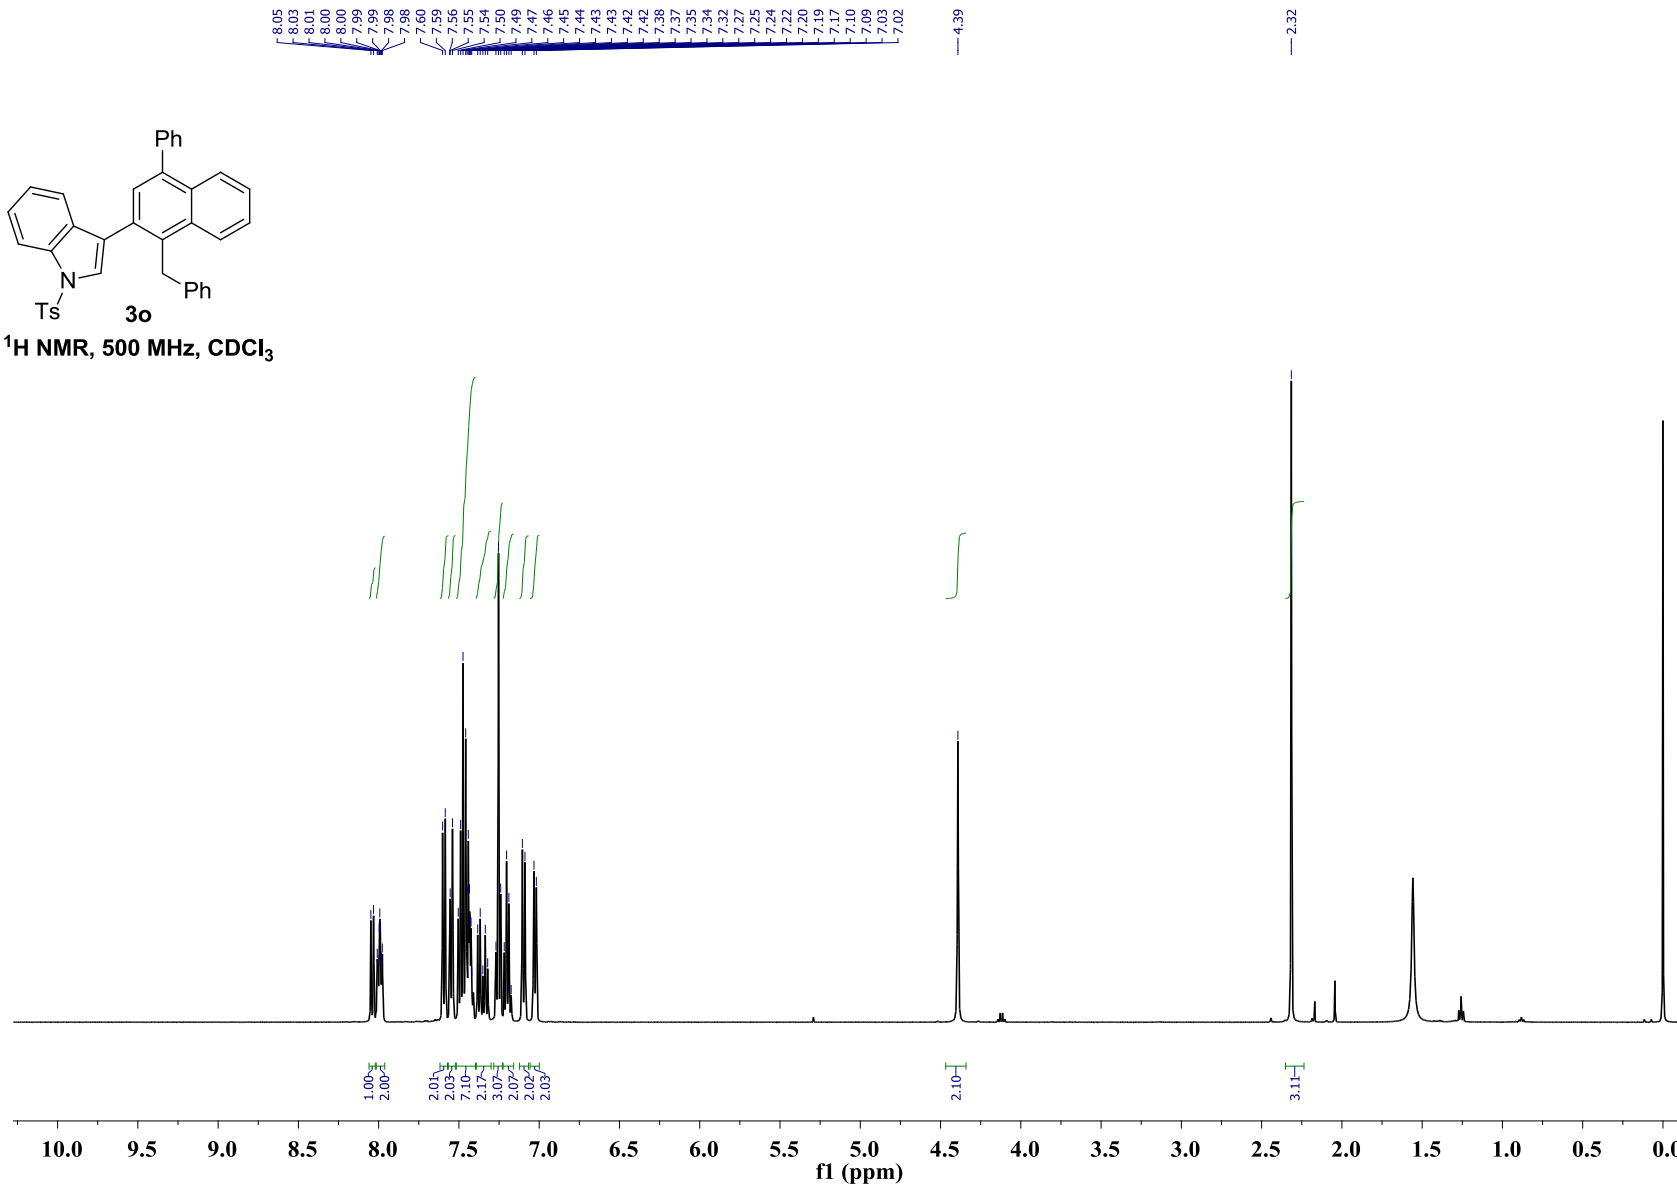

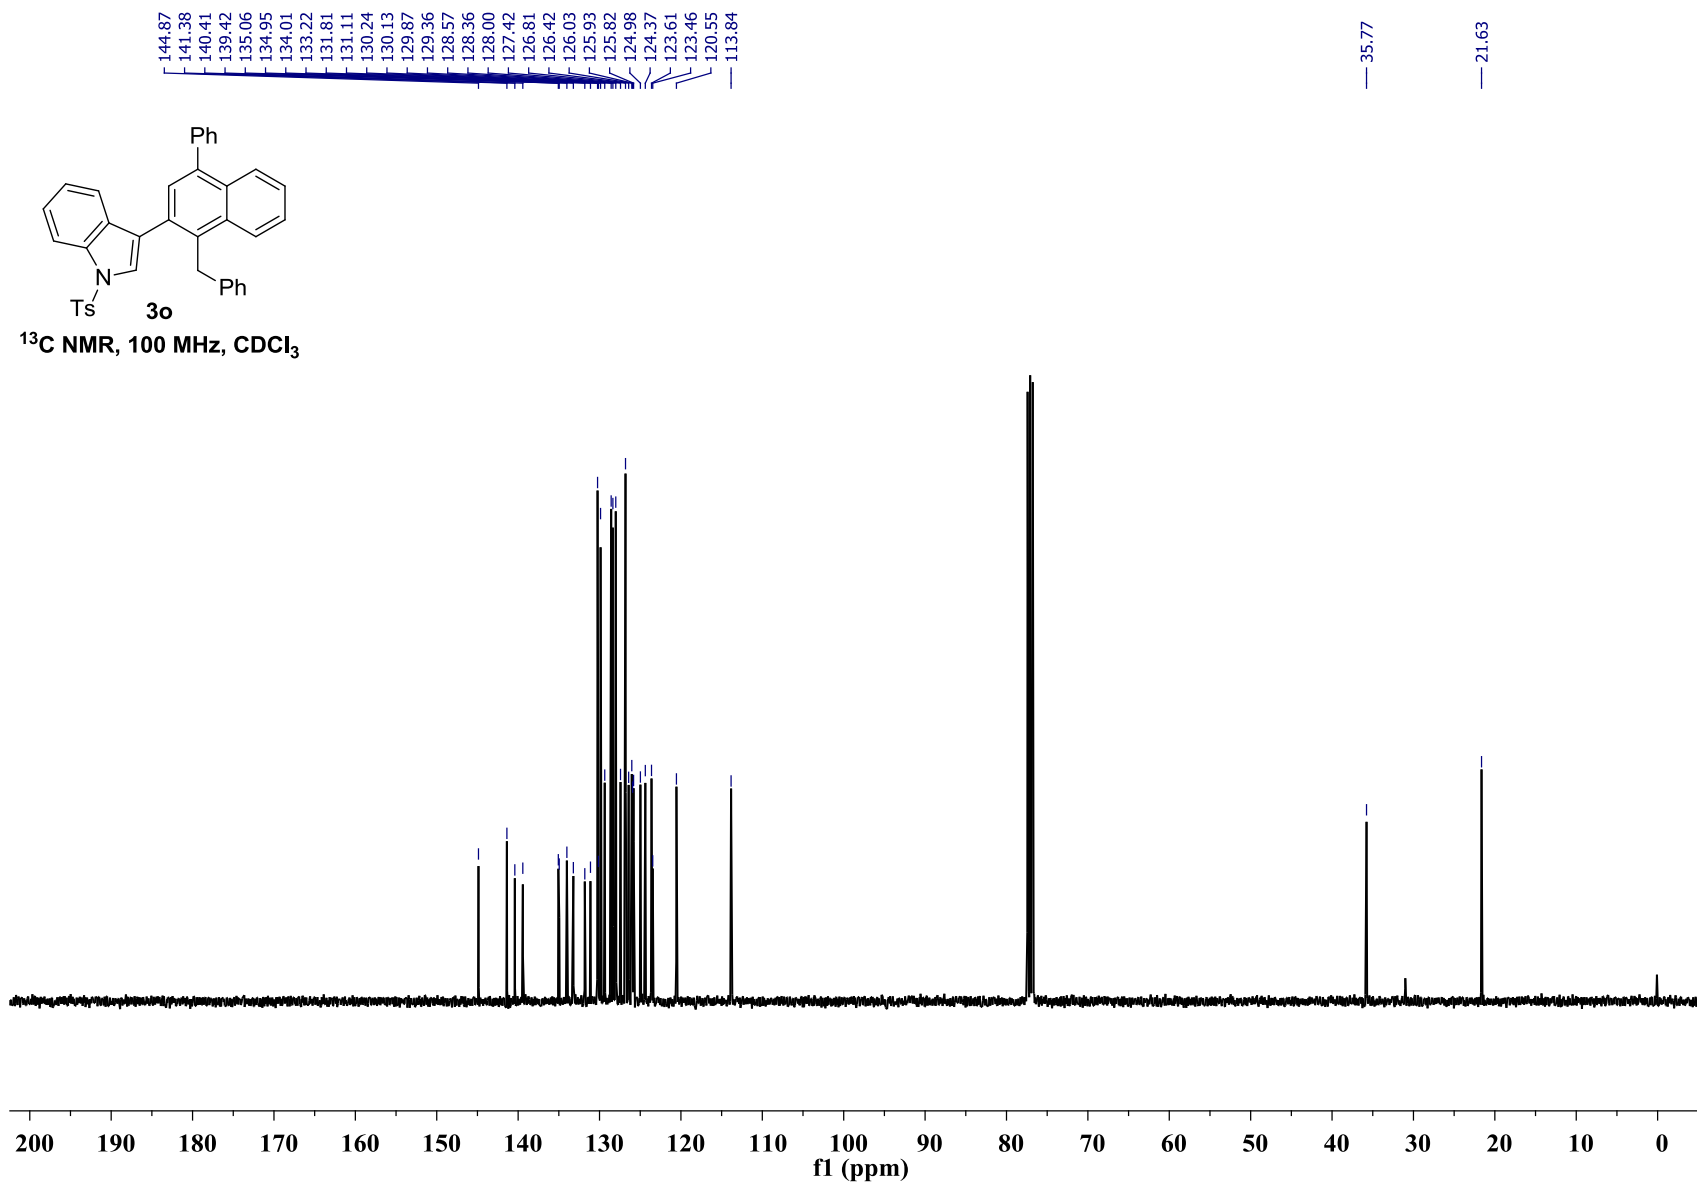



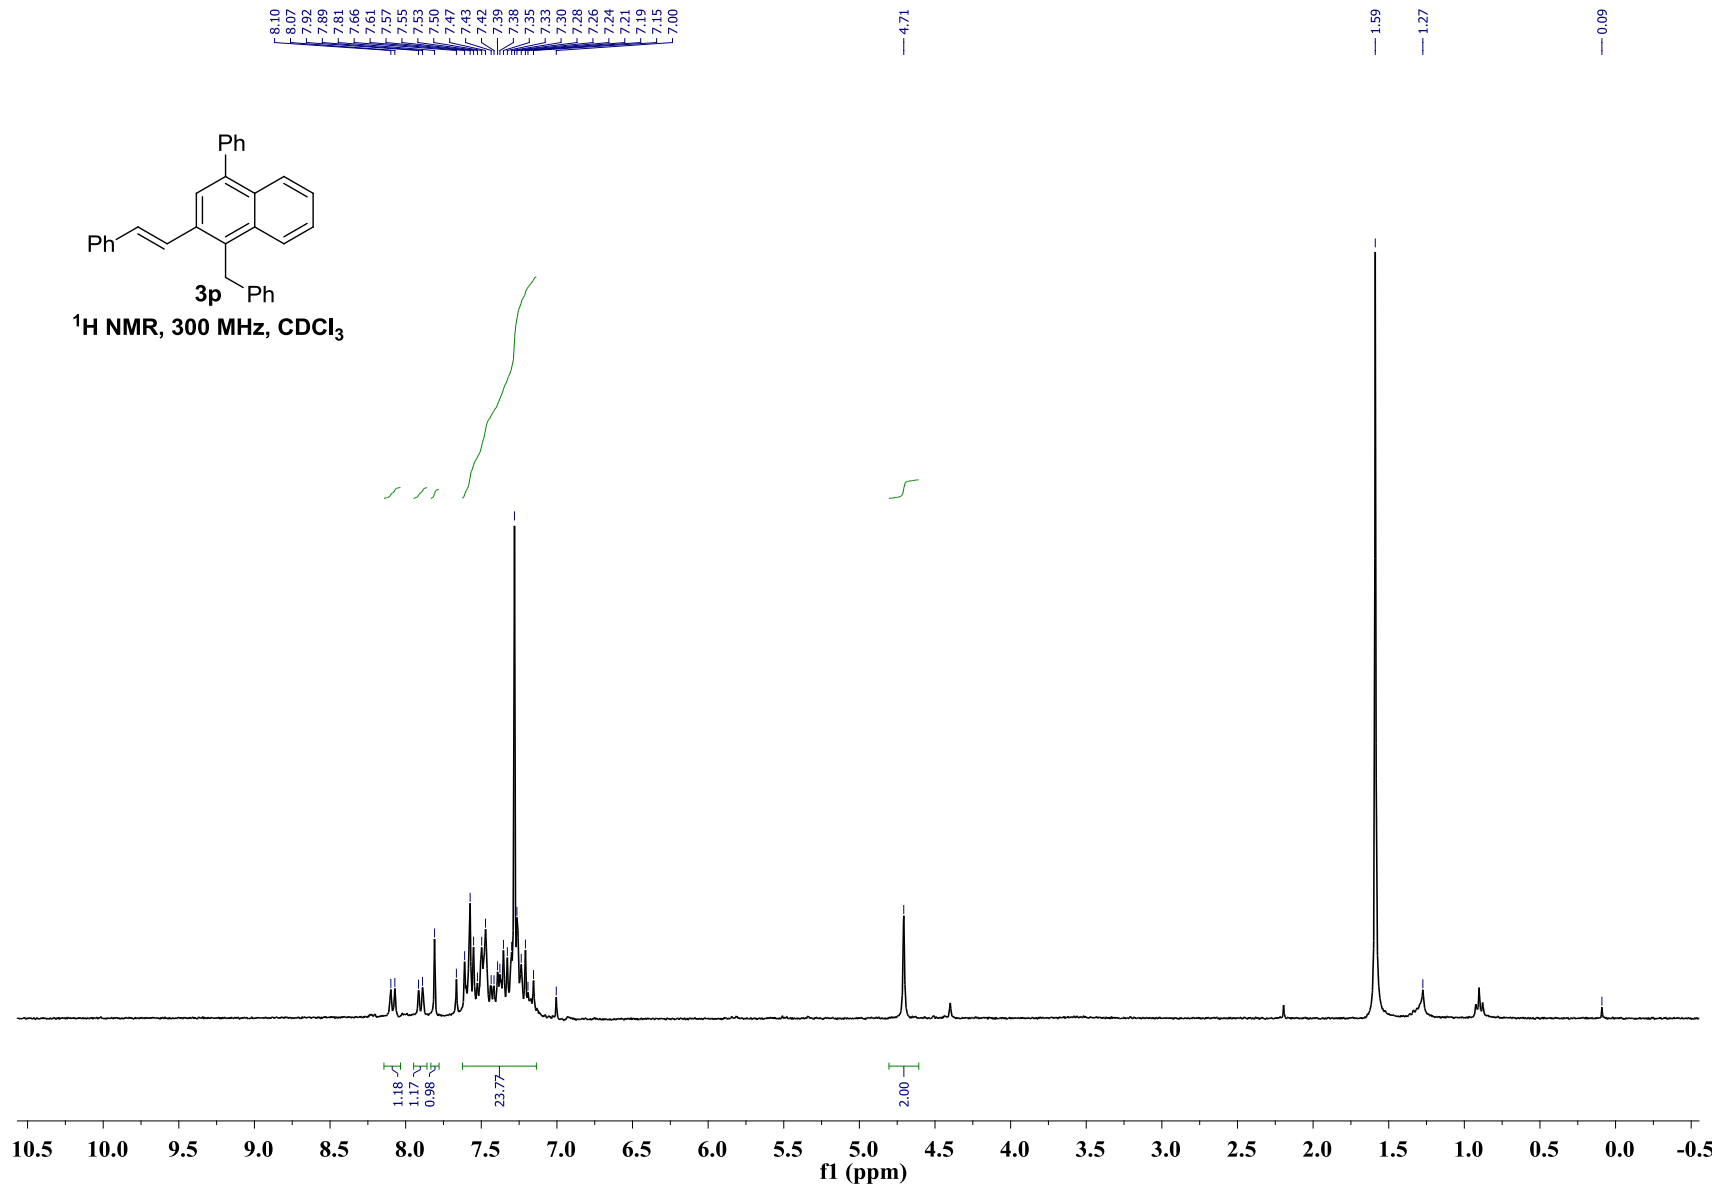

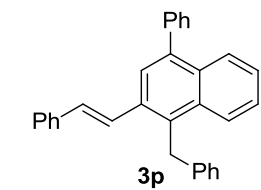

<sup>13</sup>C NMR, 100 MHz, CDCl<sub>3</sub>

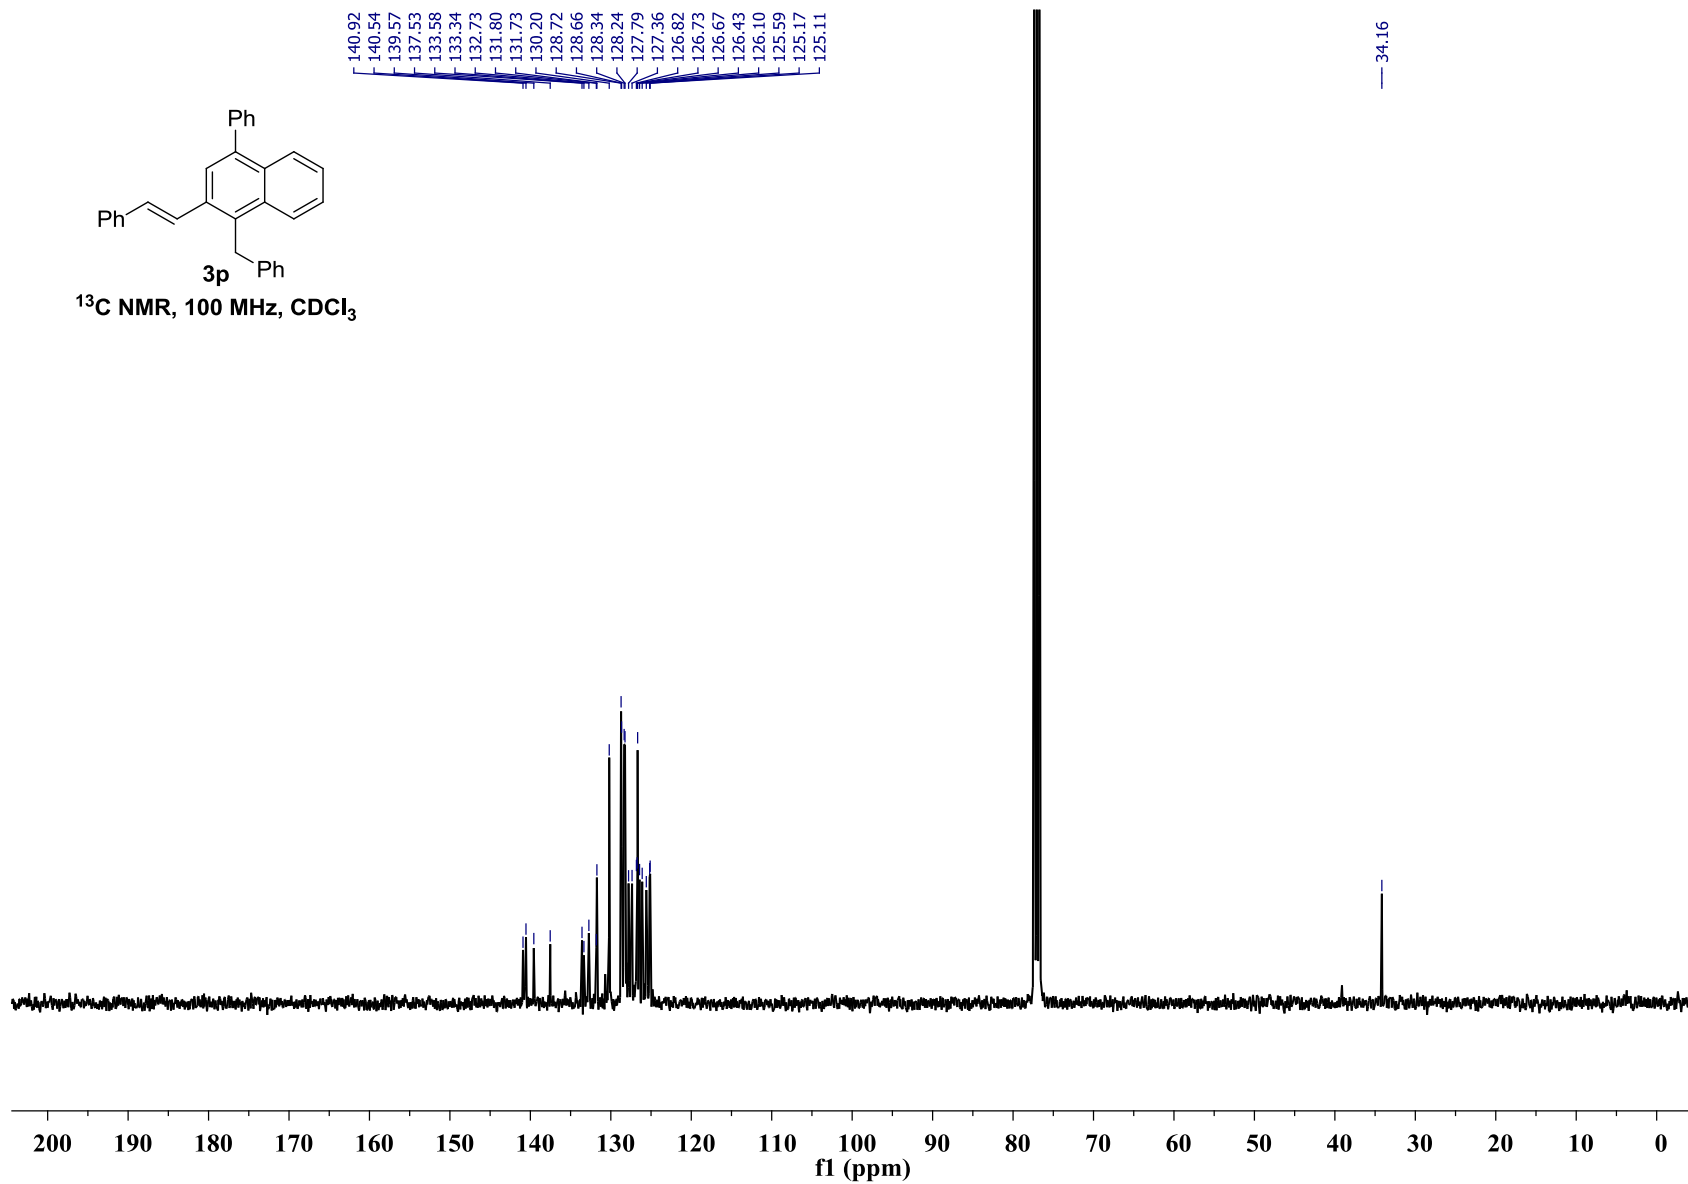

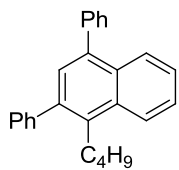

3q

$^1\text{H NMR}$ , 500 MHz,  $\text{CDCl}_3$

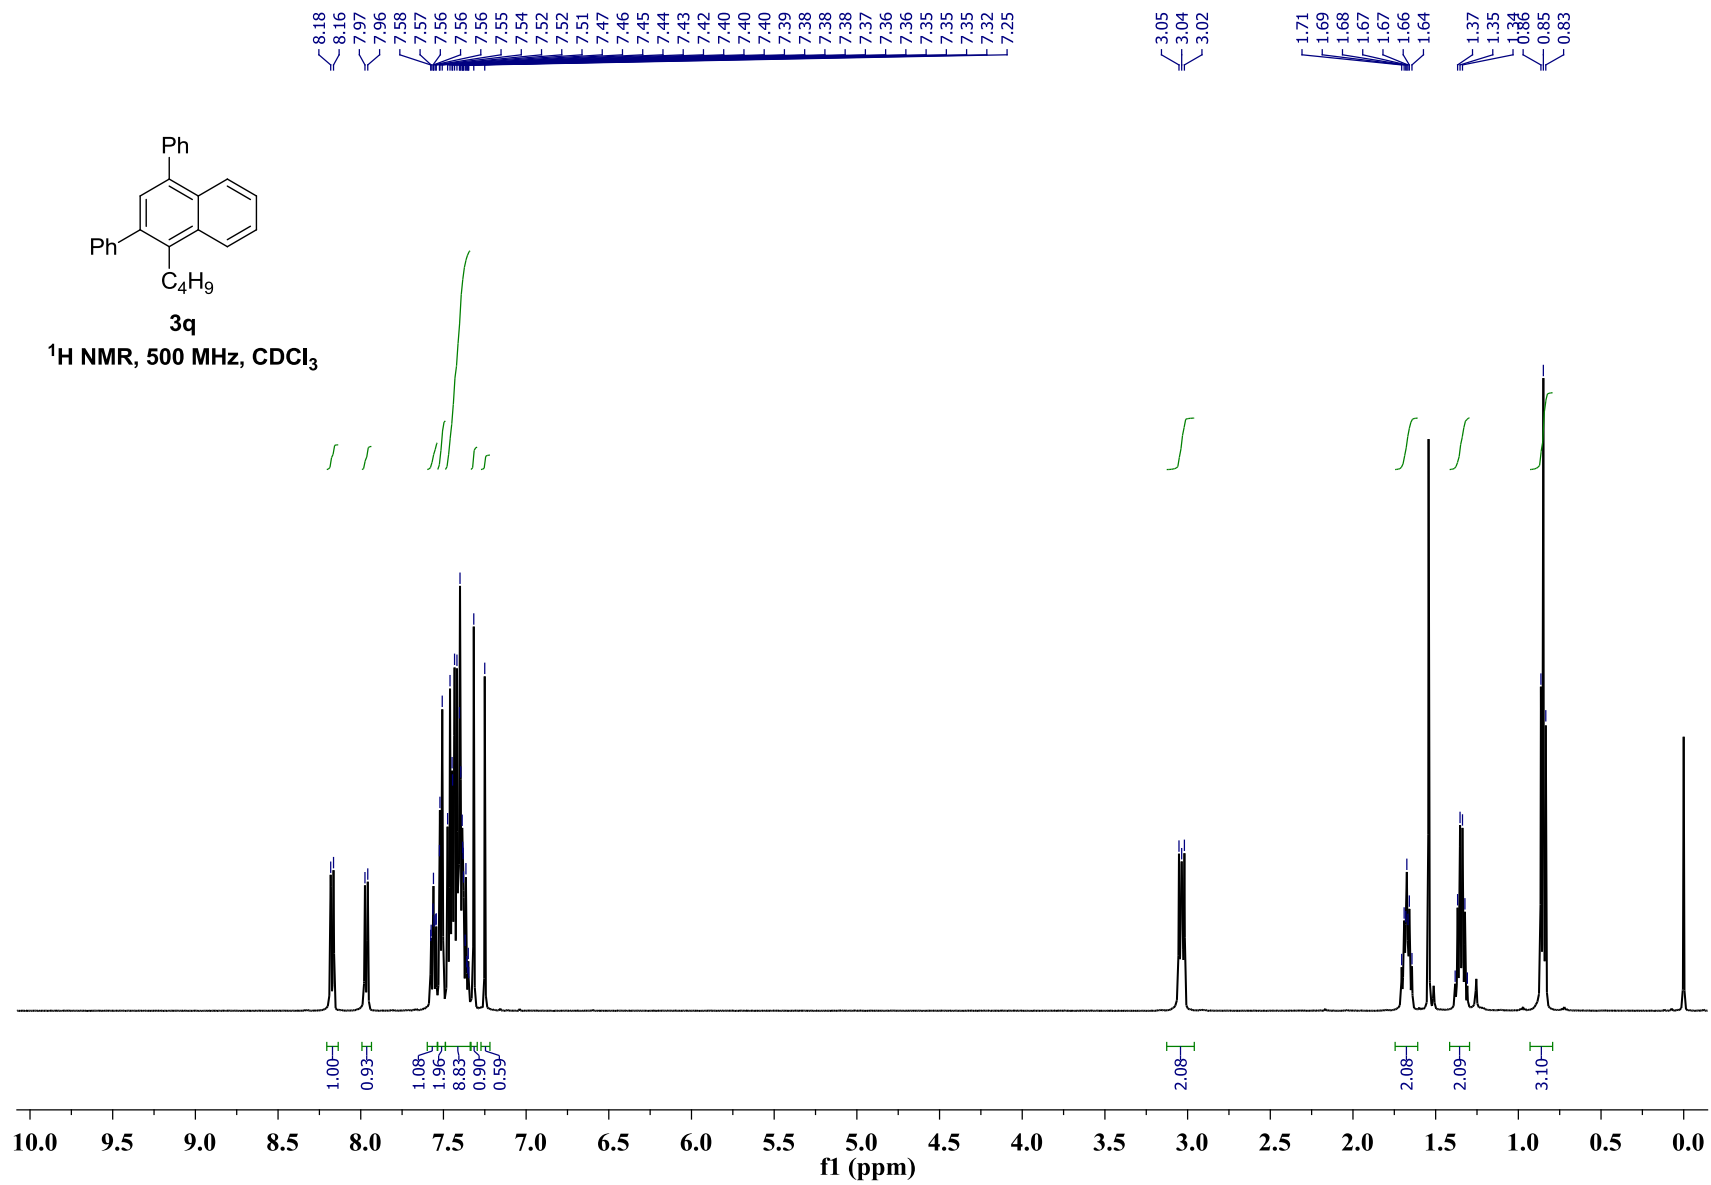

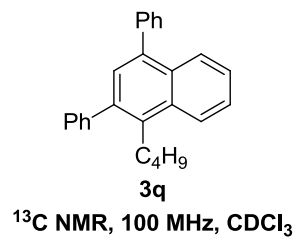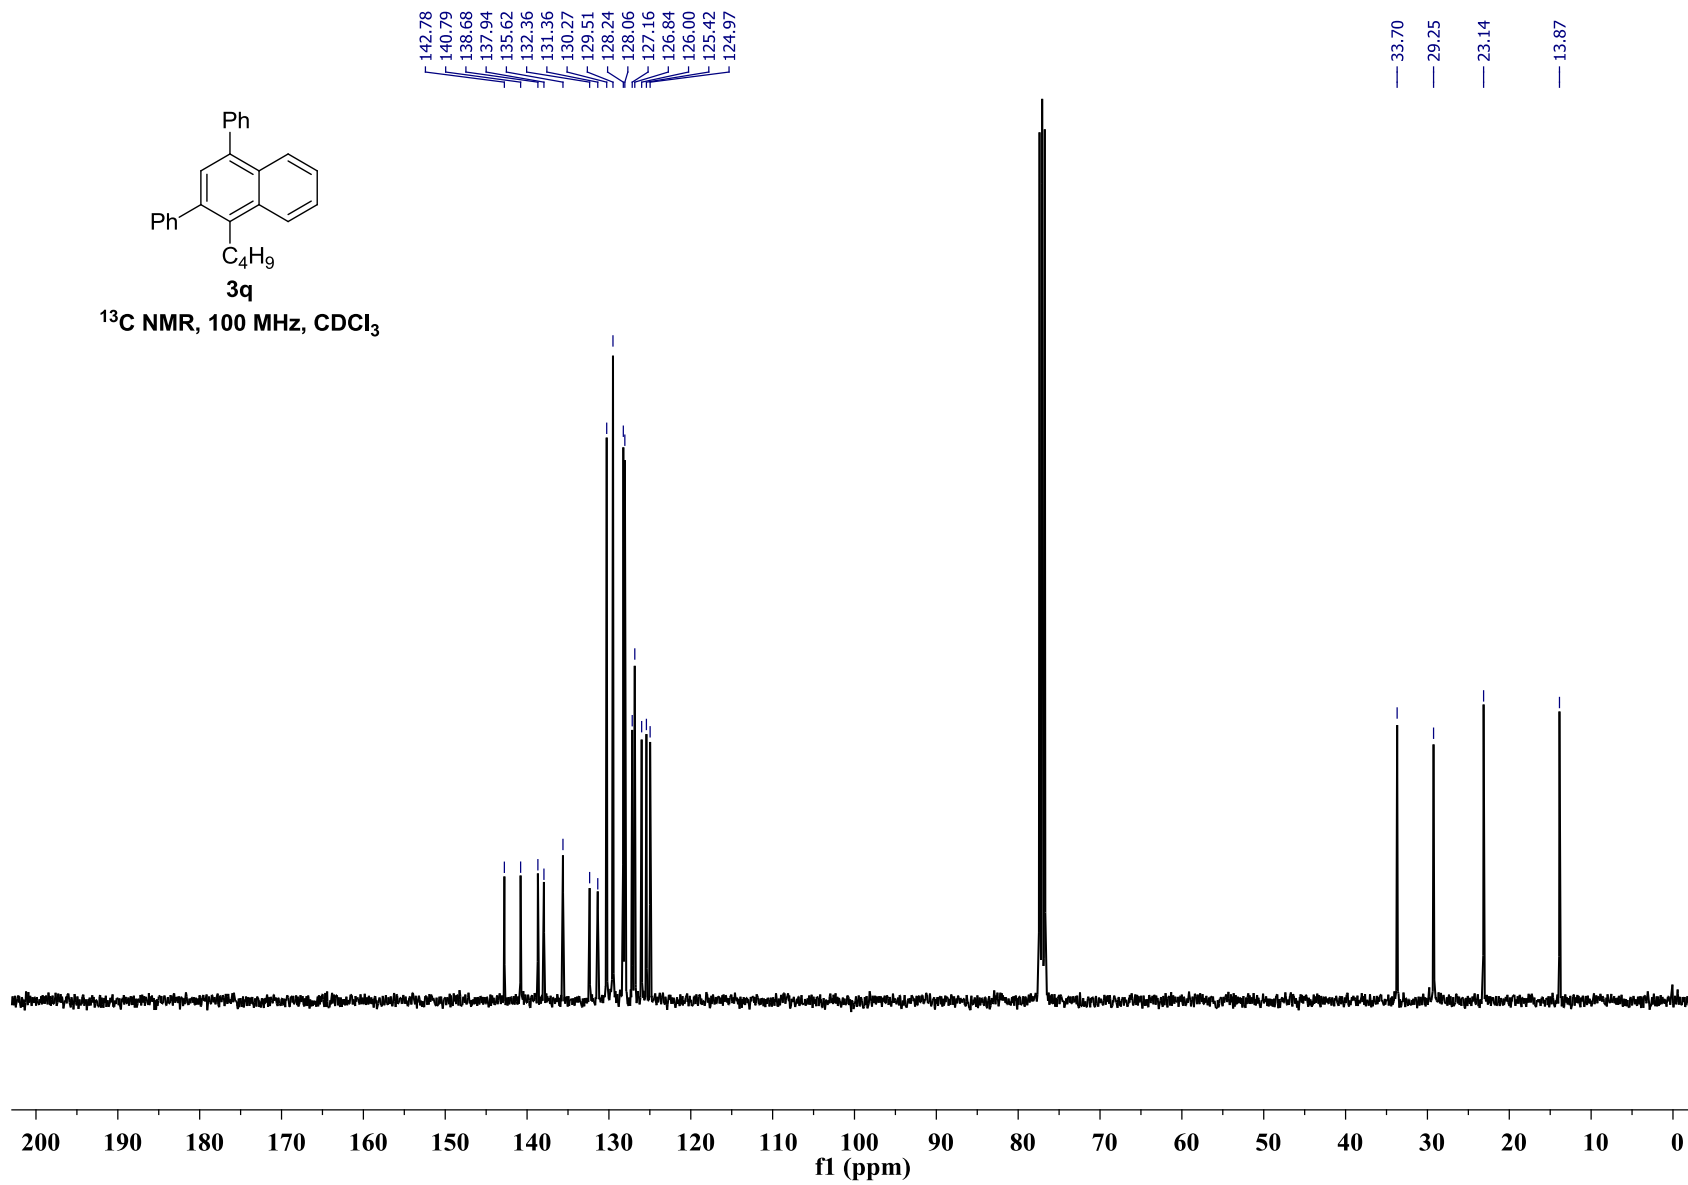

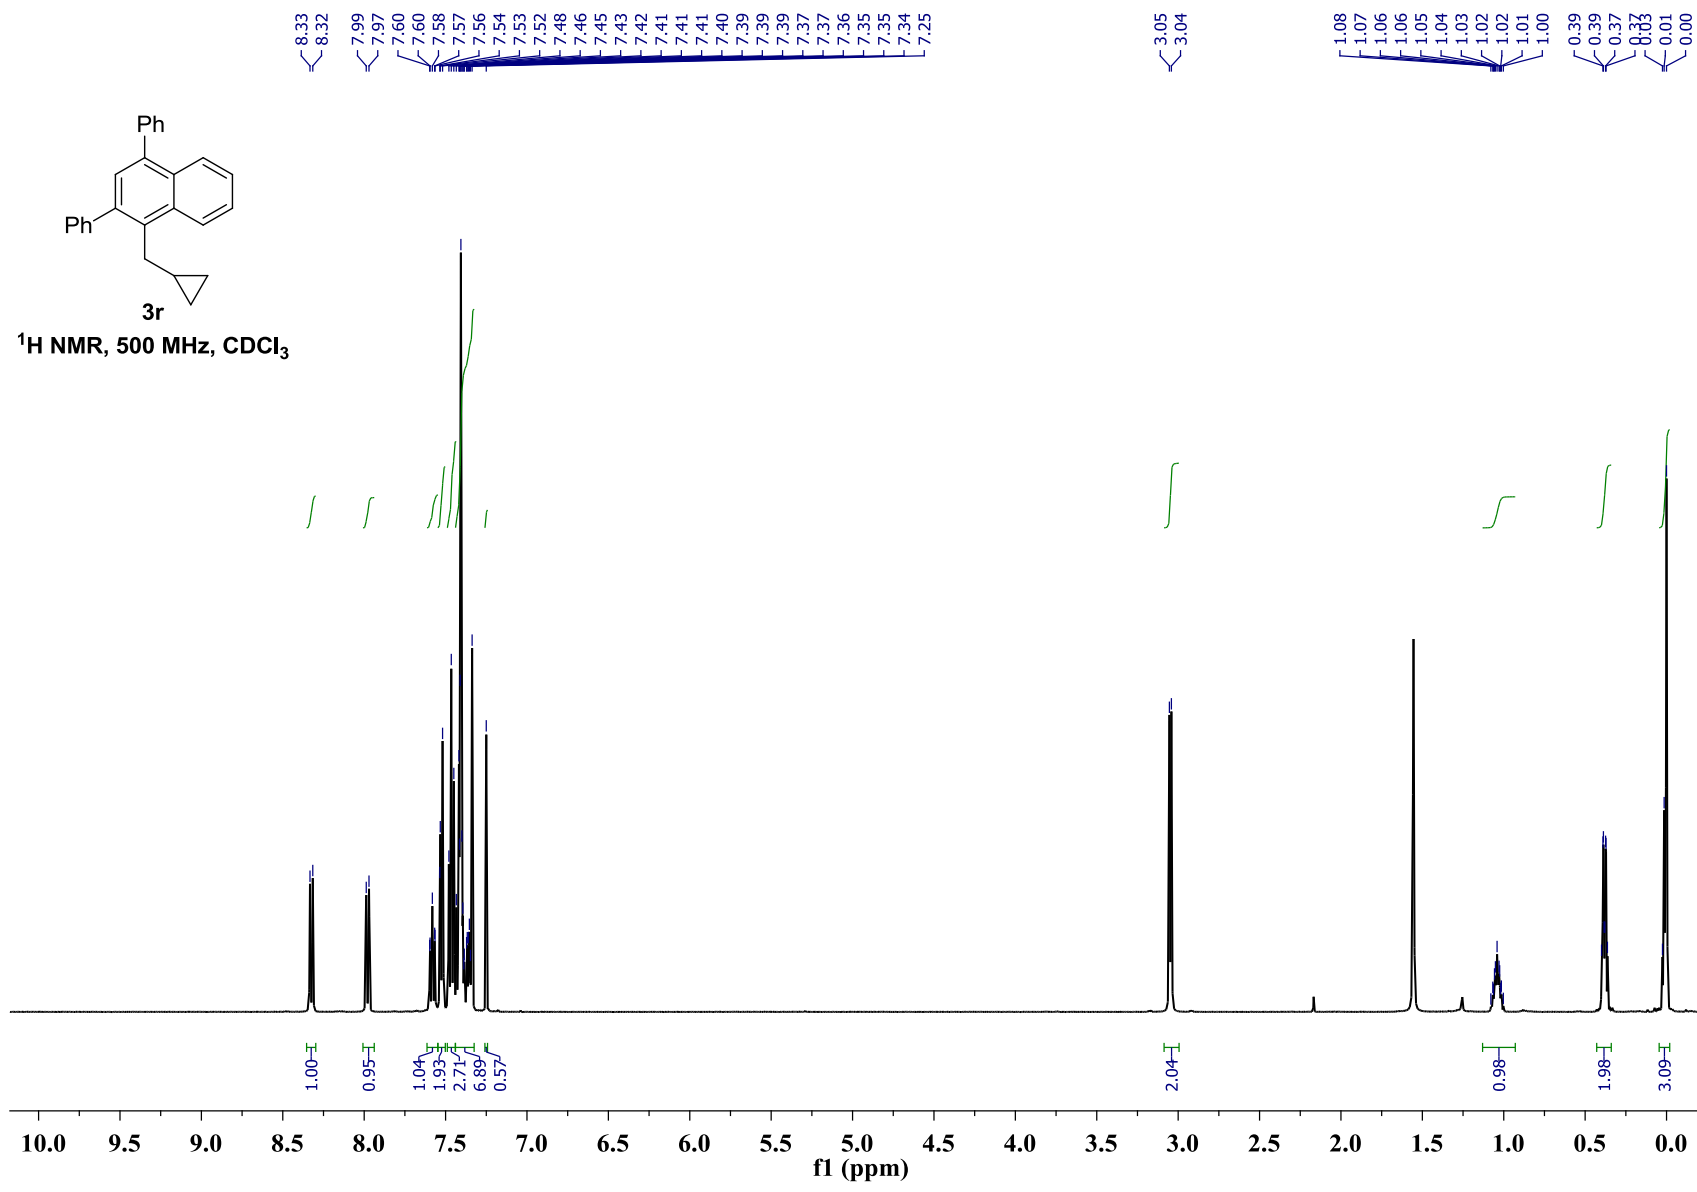

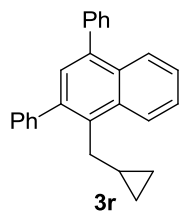

<sup>13</sup>C NMR, 100 MHz, CDCl<sub>3</sub>

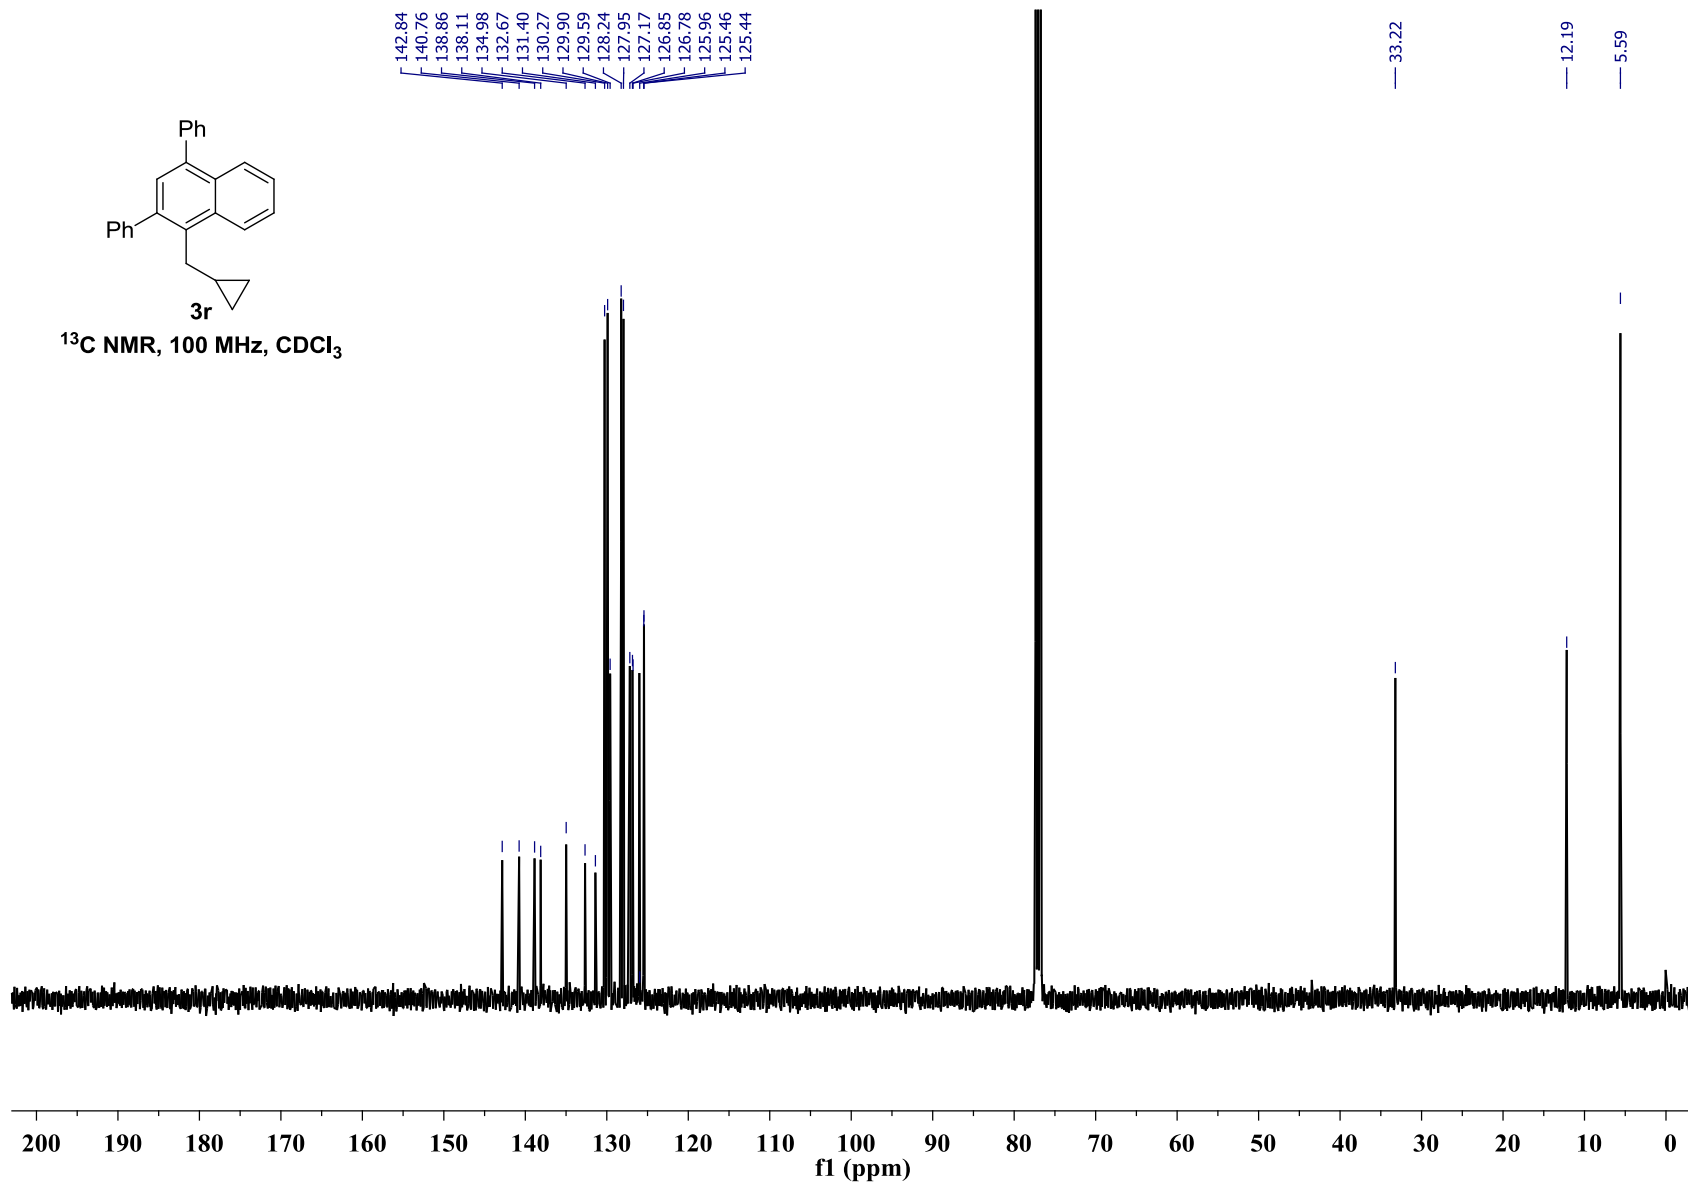

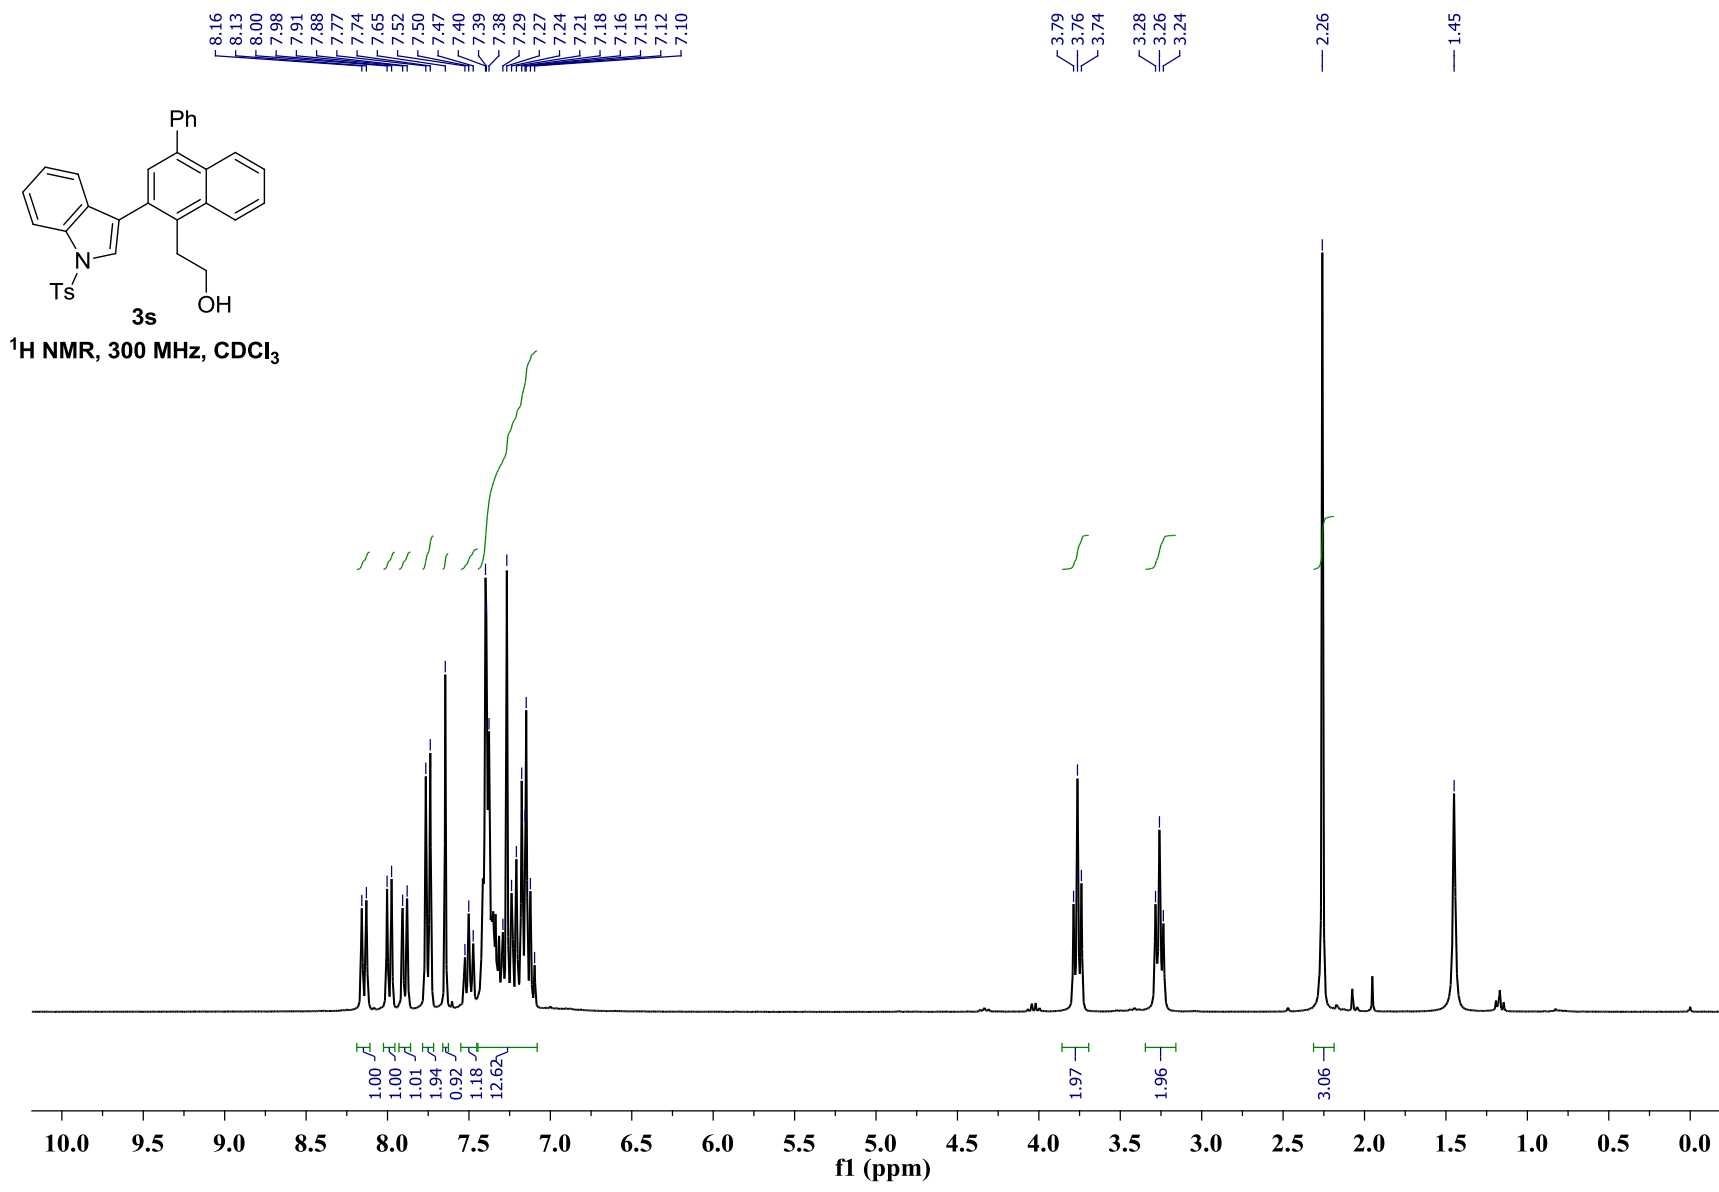

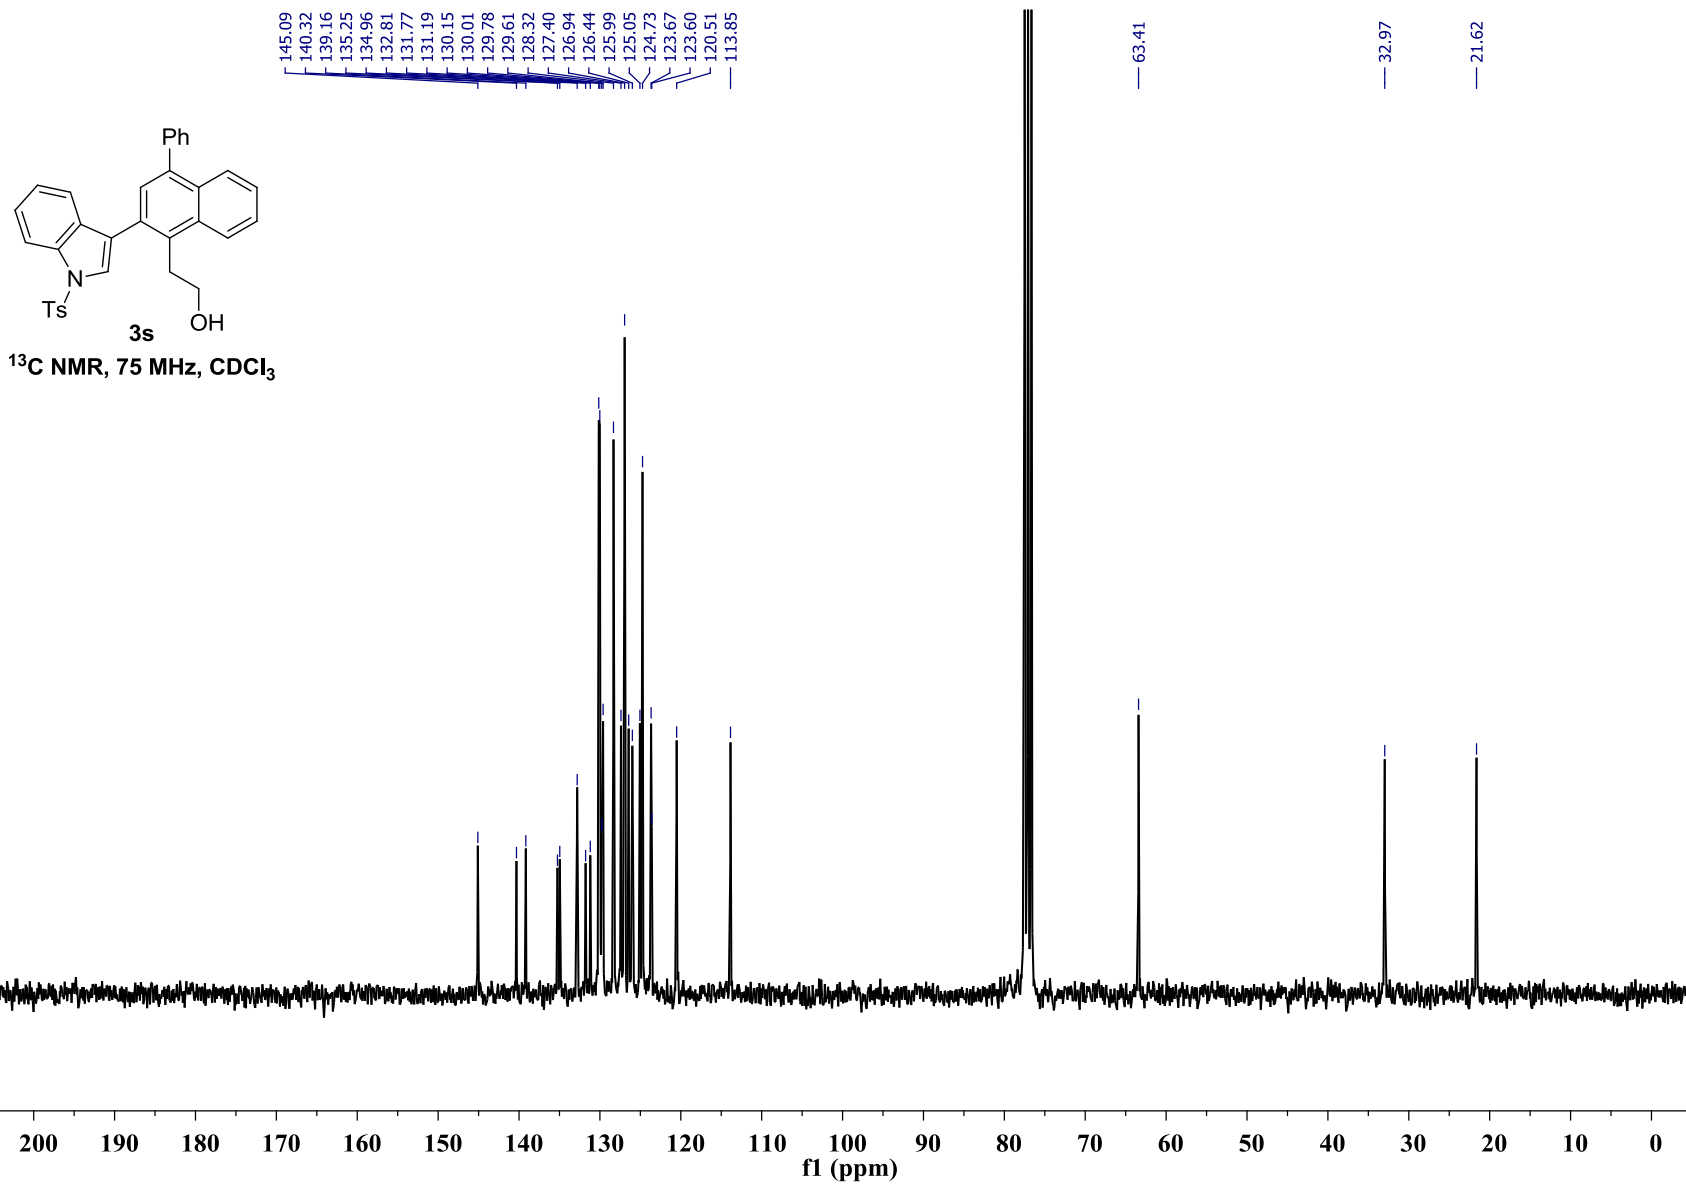



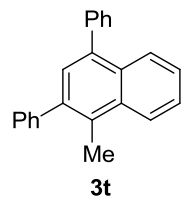

<sup>1</sup>H NMR, 500 MHz, CDCl<sub>3</sub>

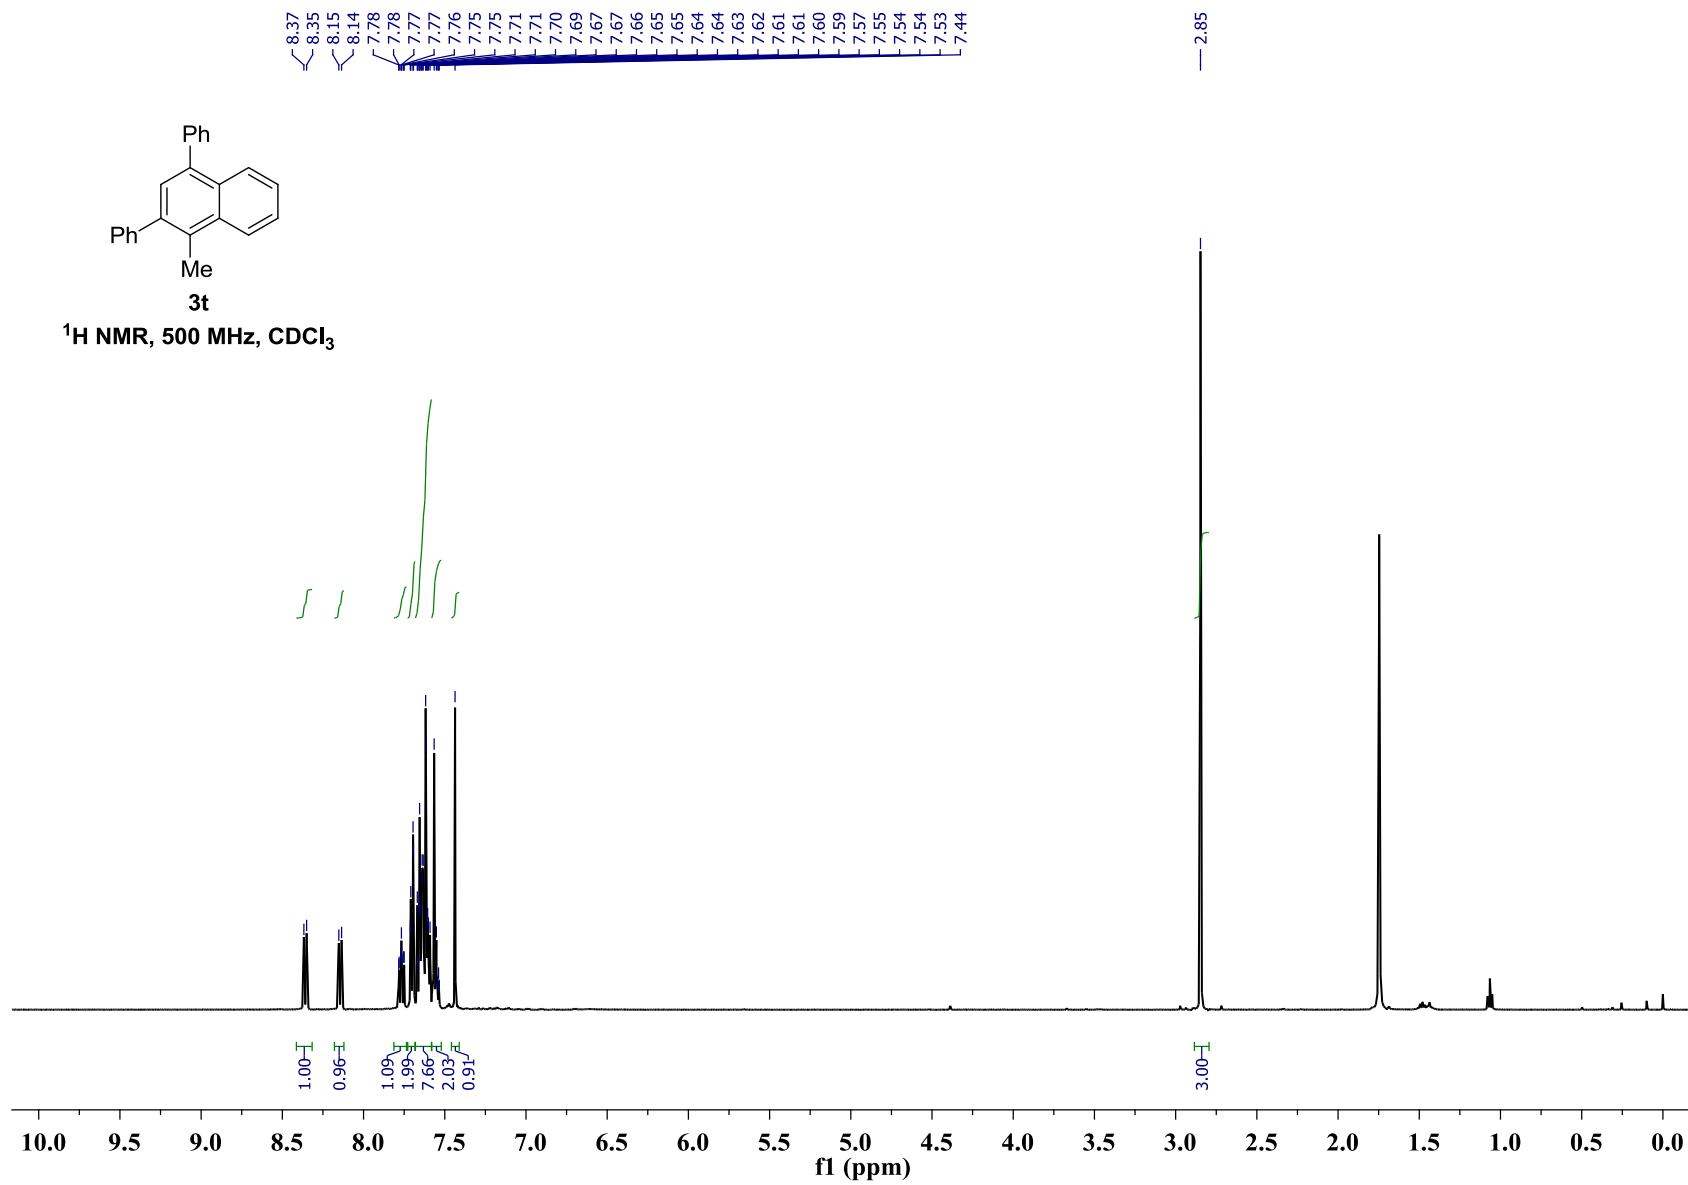

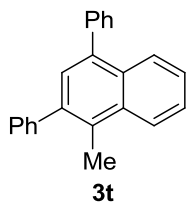

<sup>13</sup>C NMR, 100 MHz, CDCl<sub>3</sub>

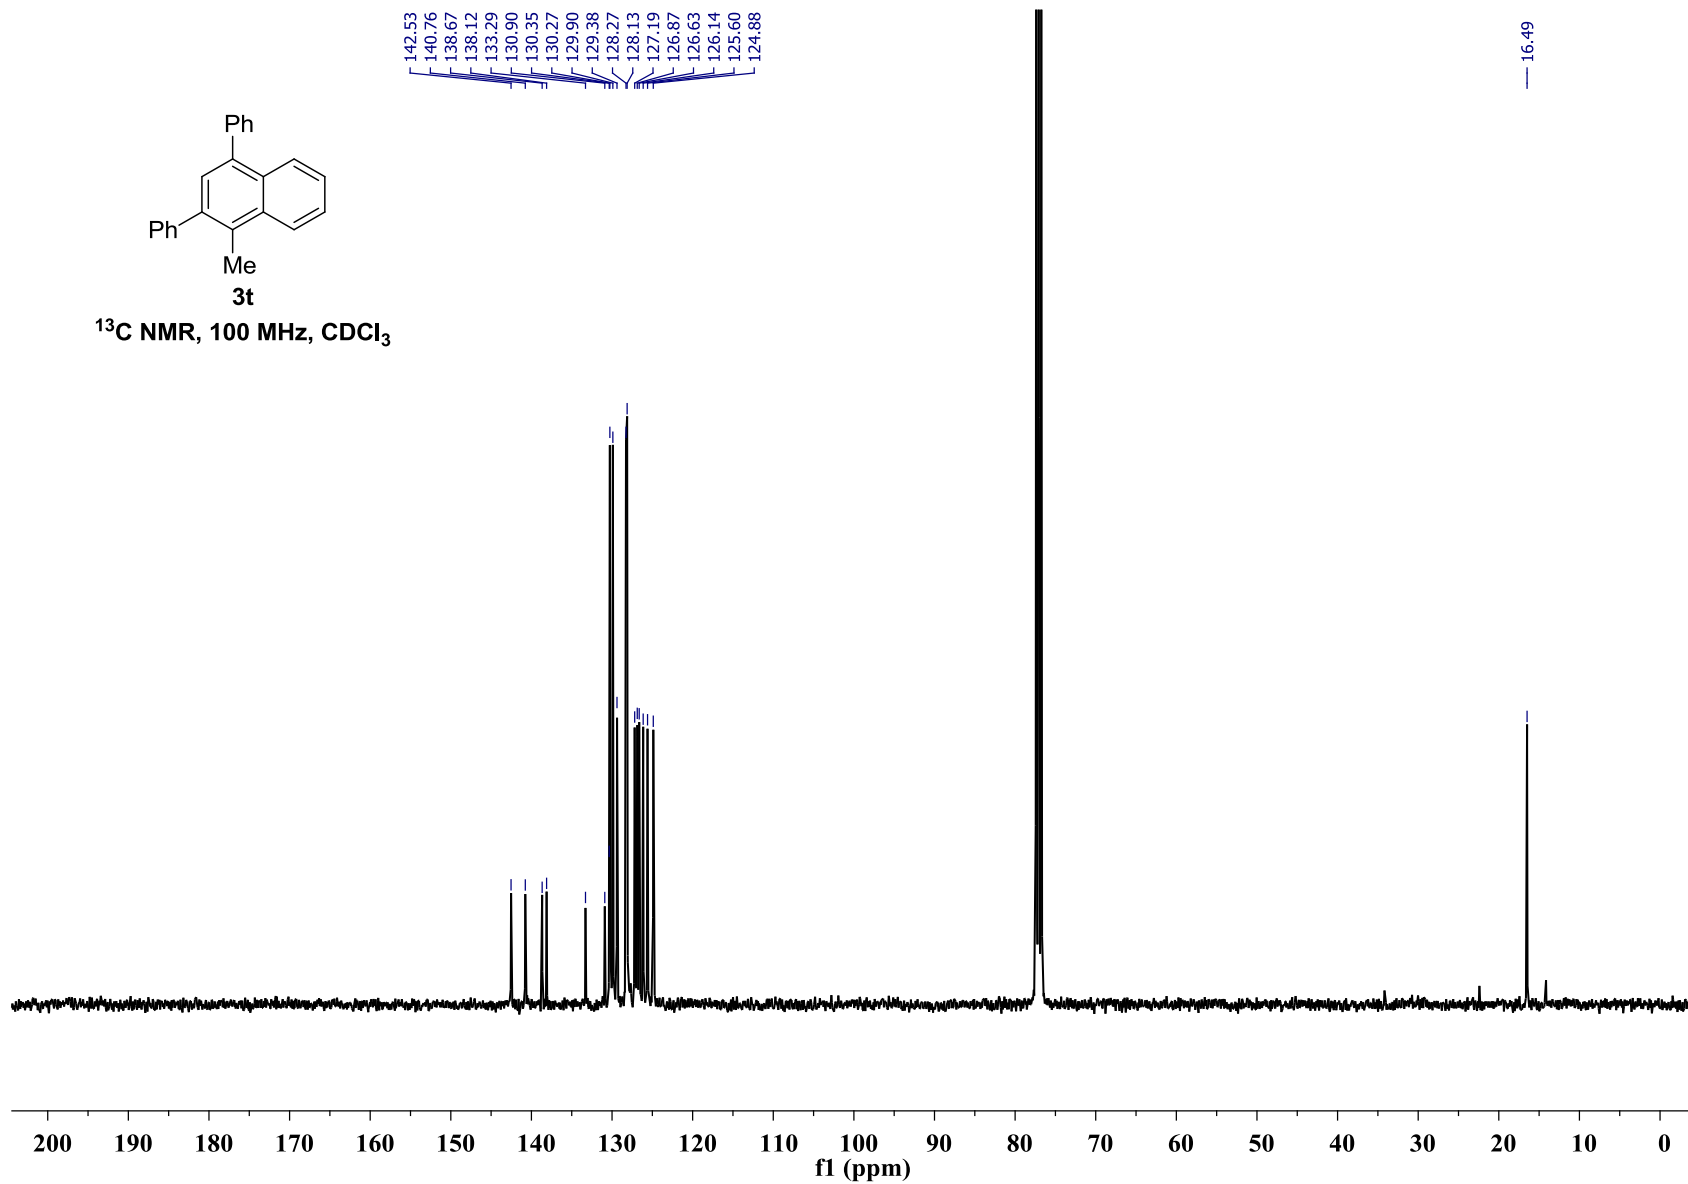

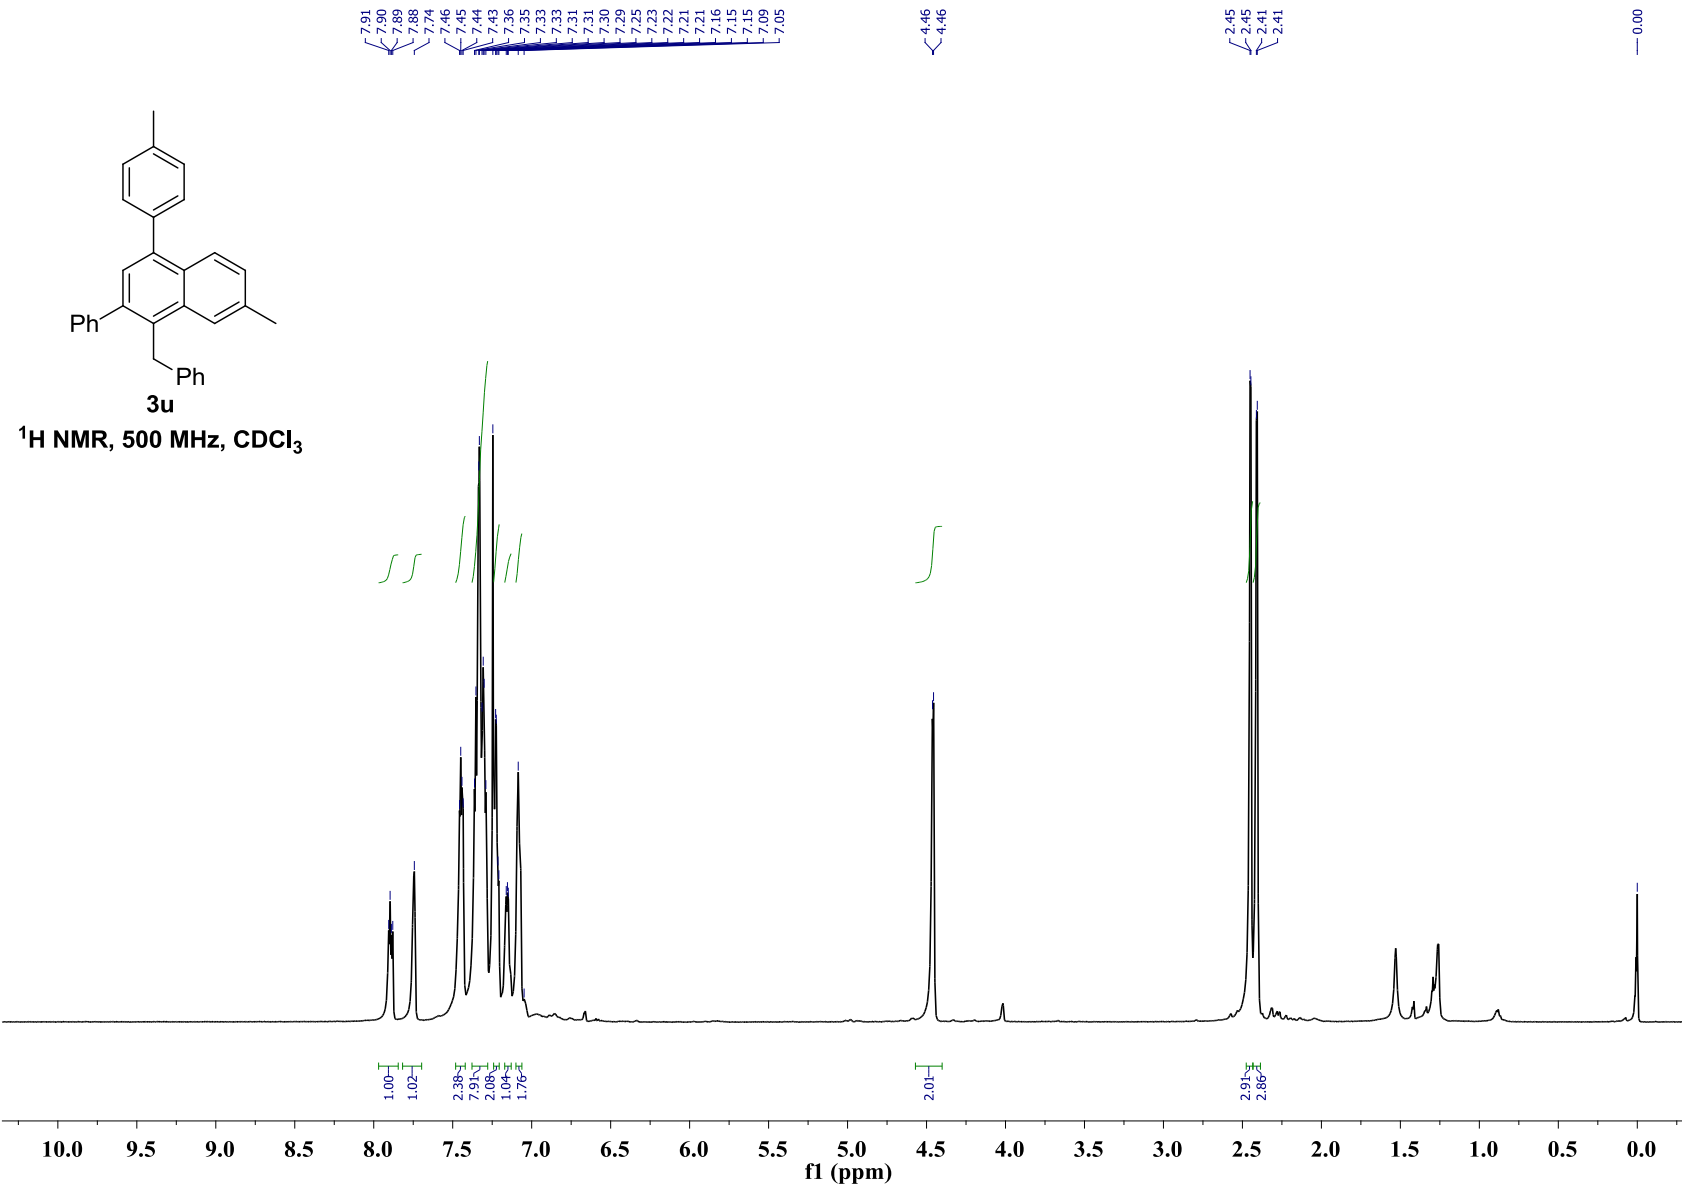

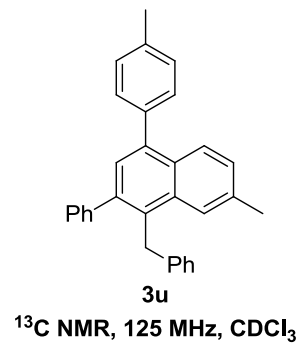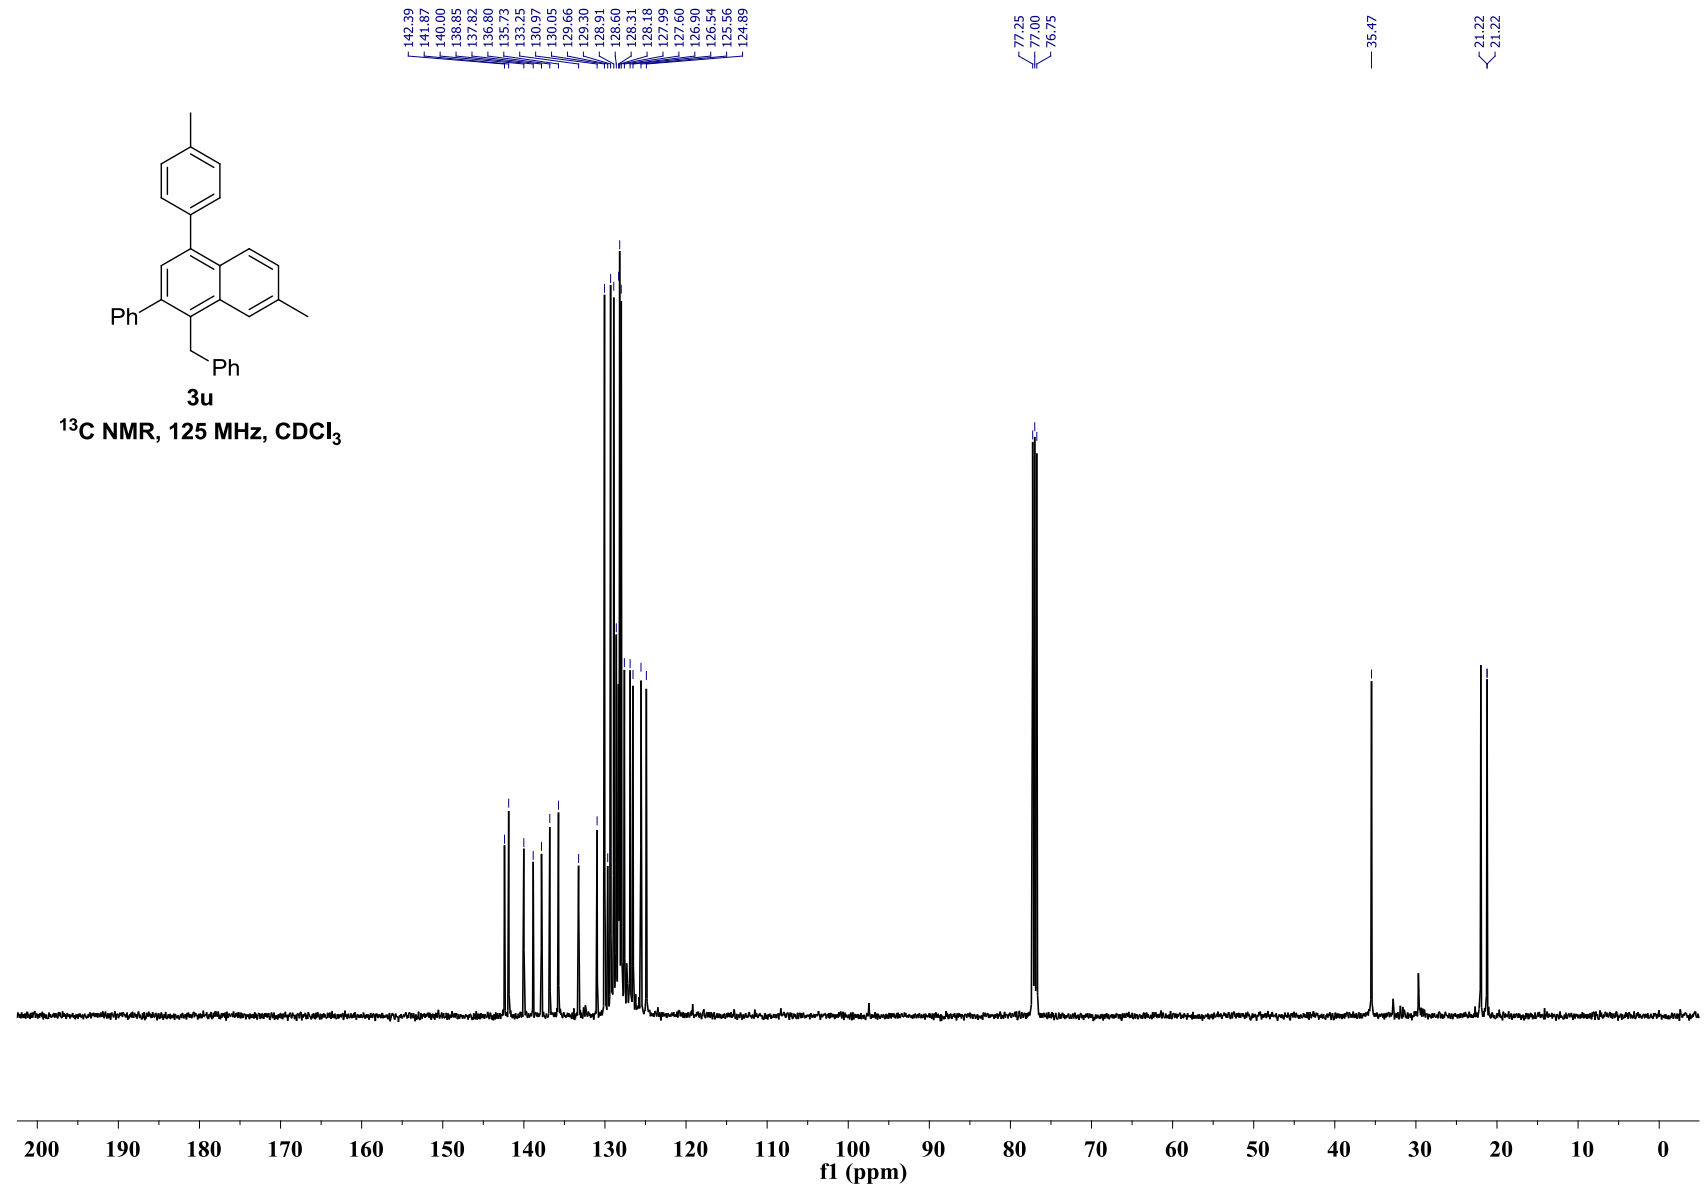

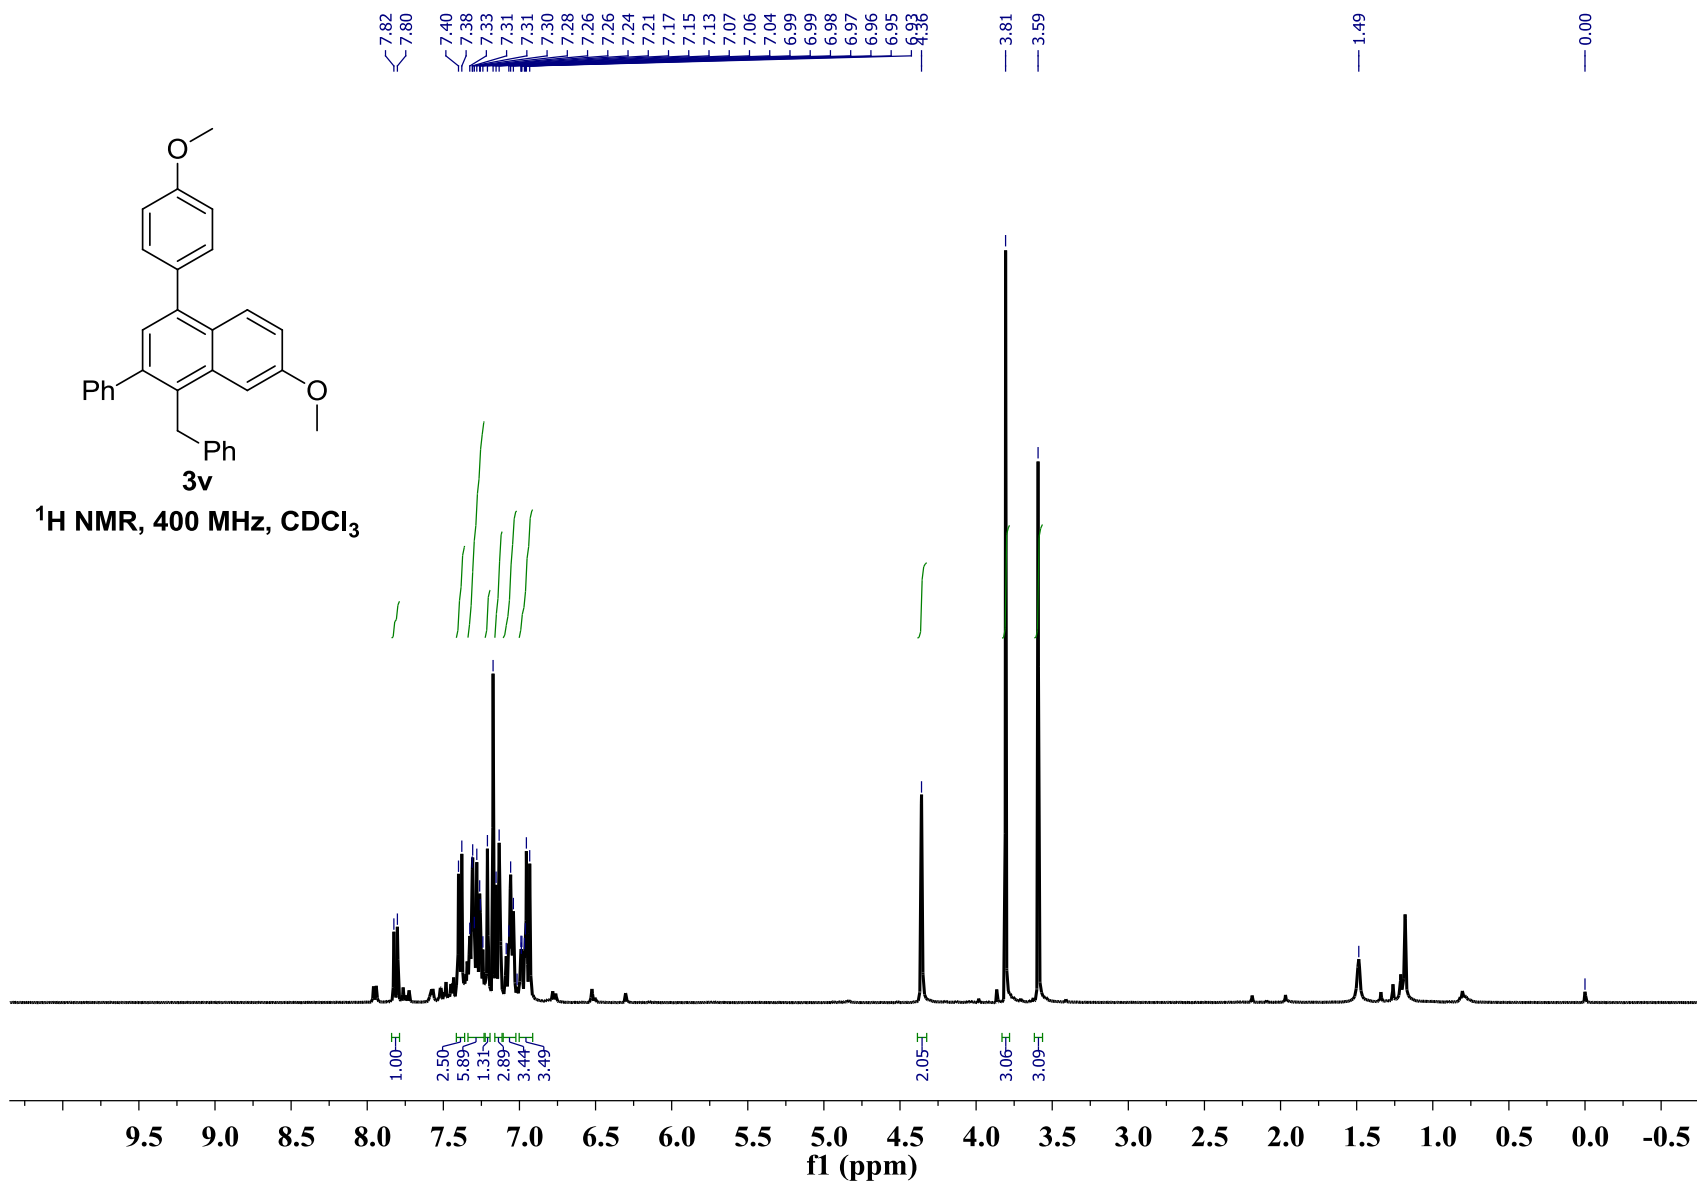

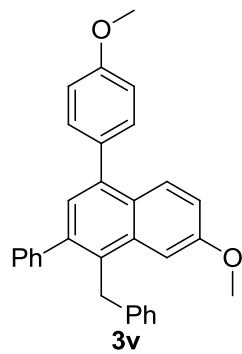

<sup>13</sup>C NMR, 100 MHz, CDCl<sub>3</sub>

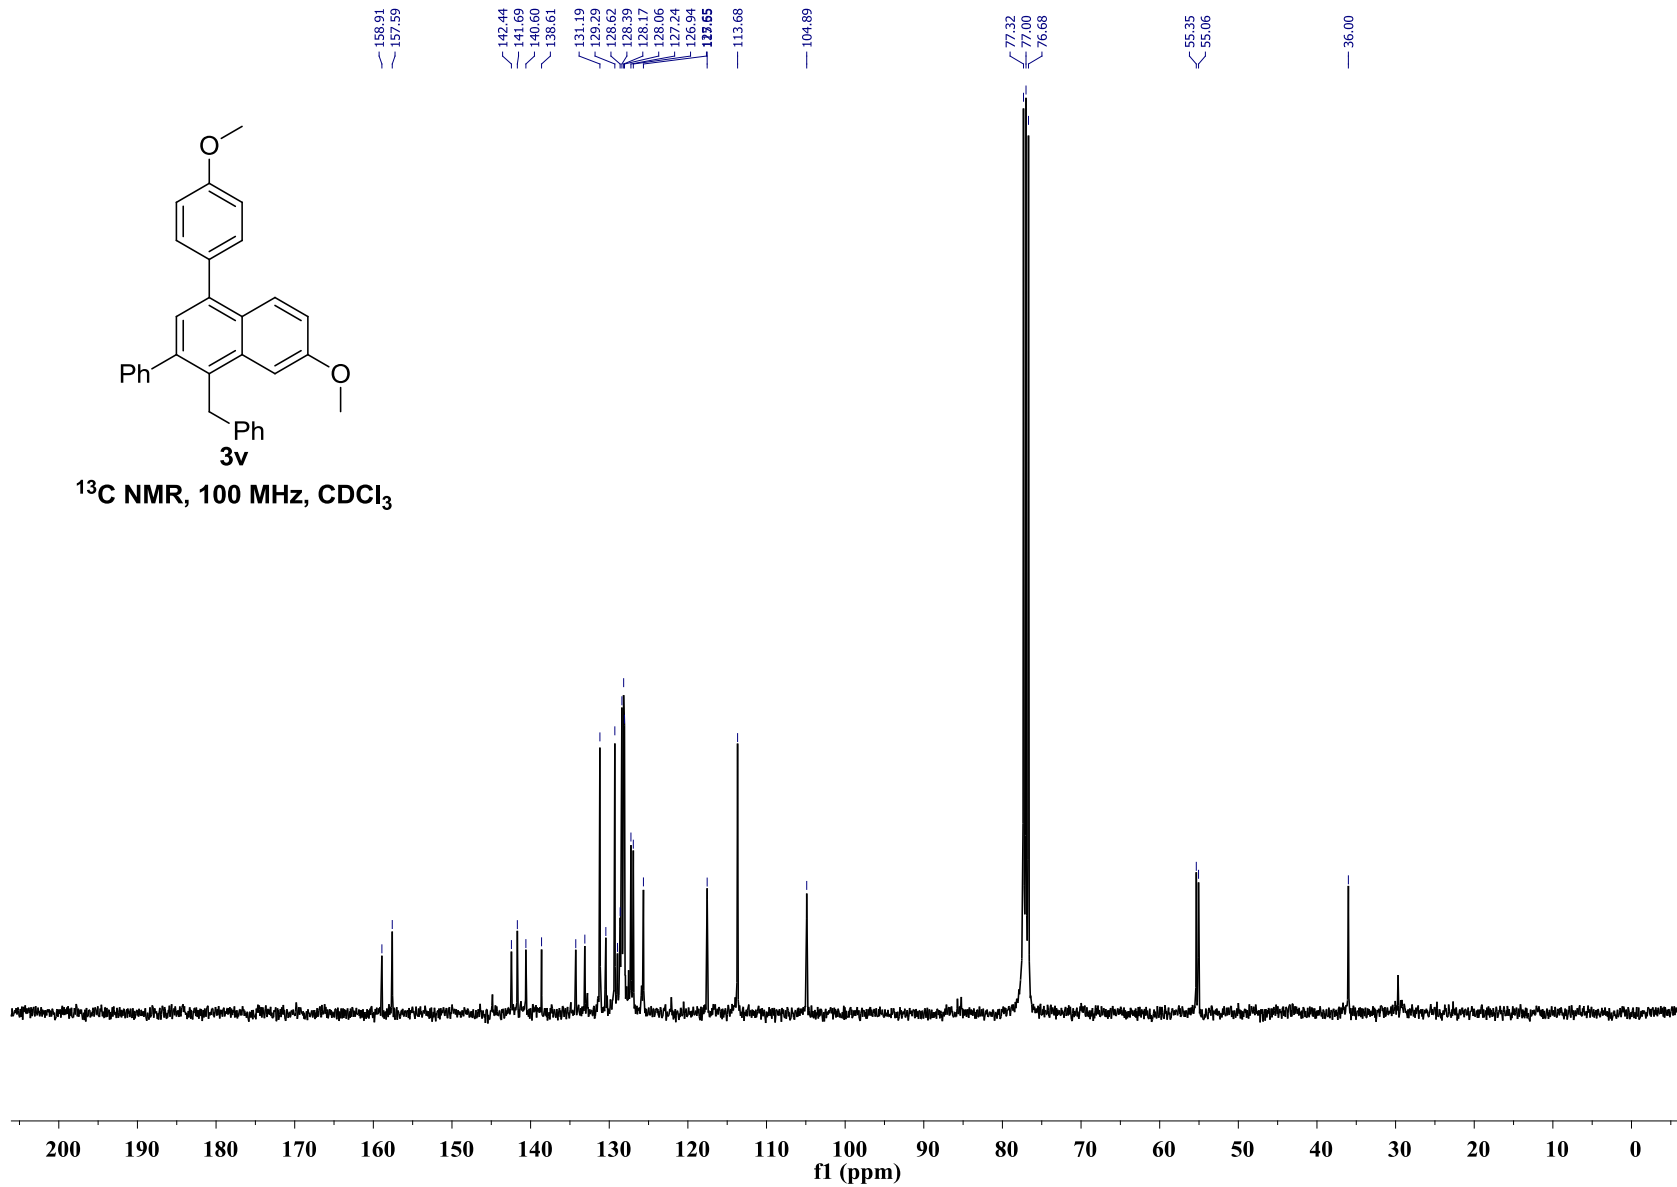

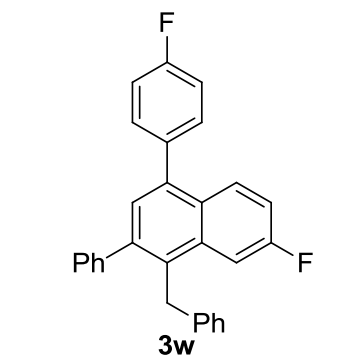

<sup>1</sup>H NMR, 500 MHz, CDCl<sub>3</sub>

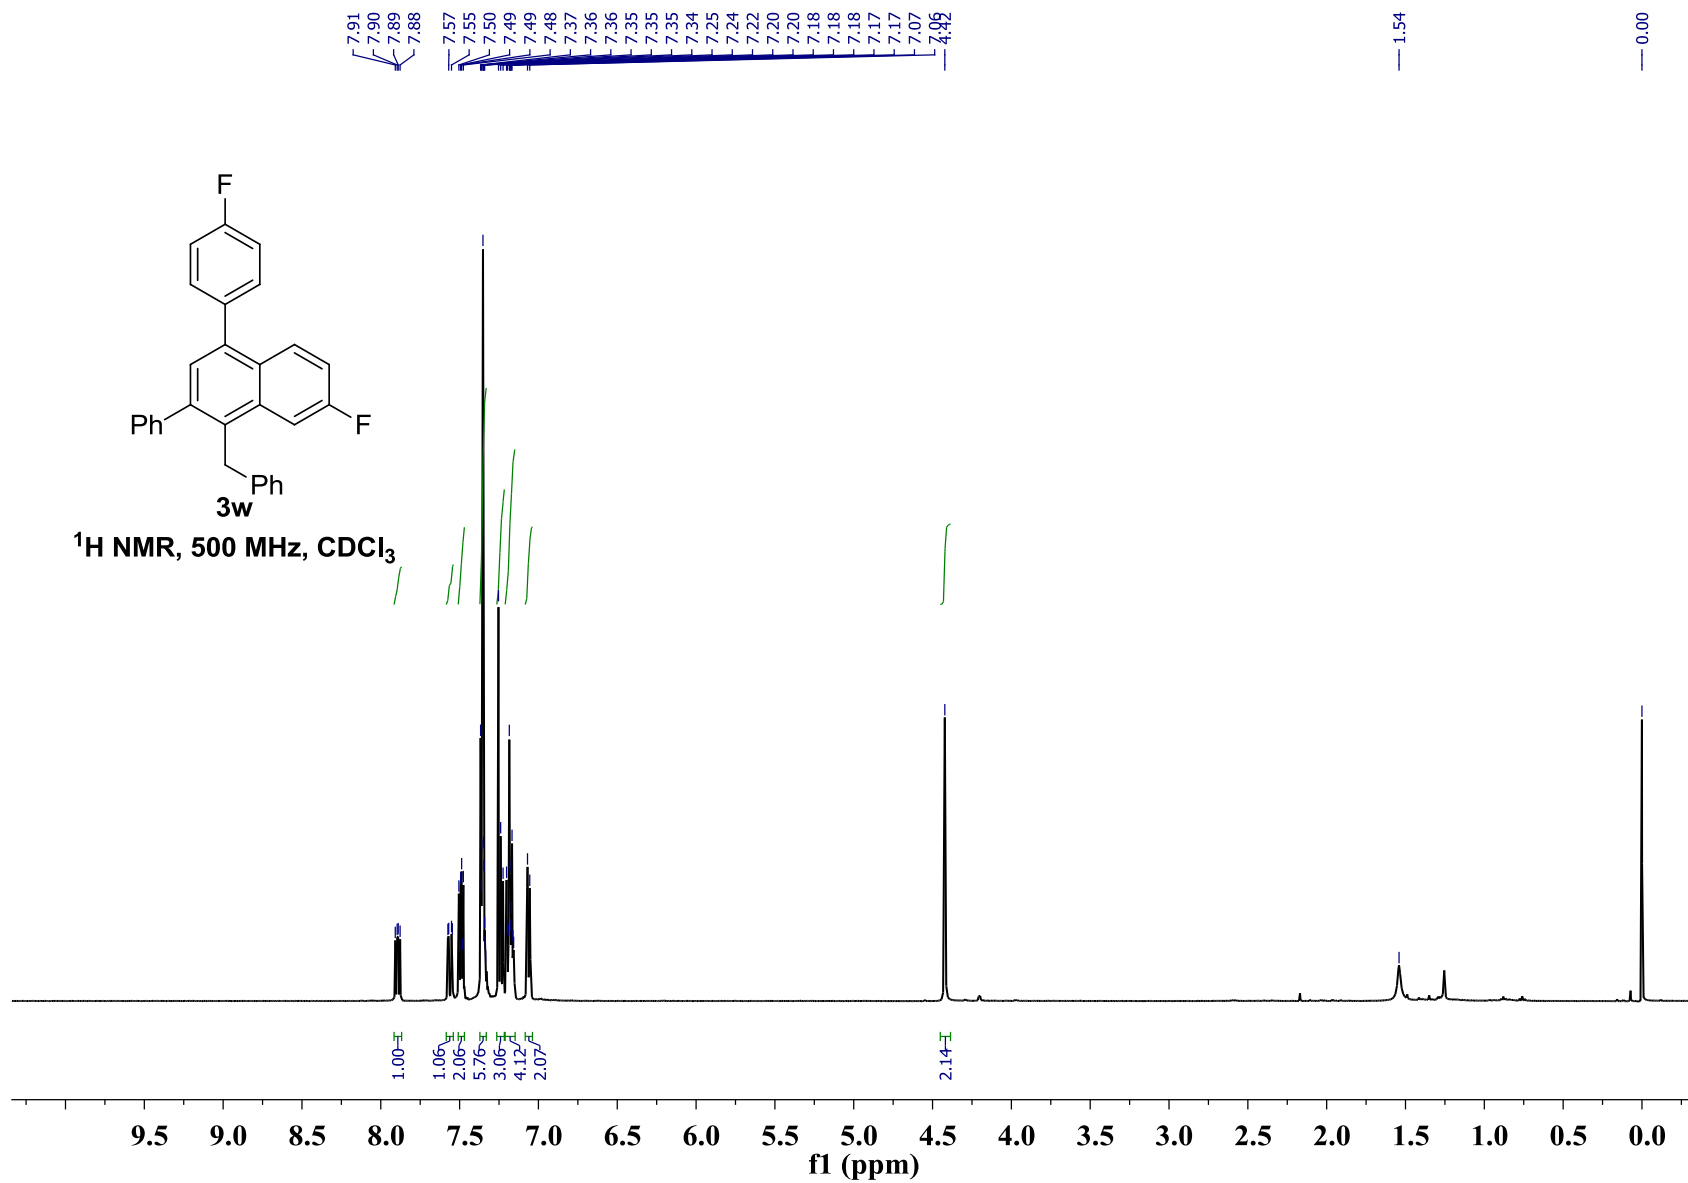

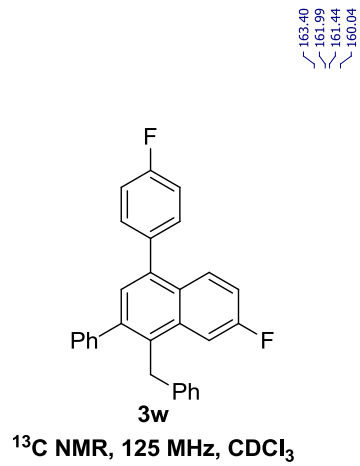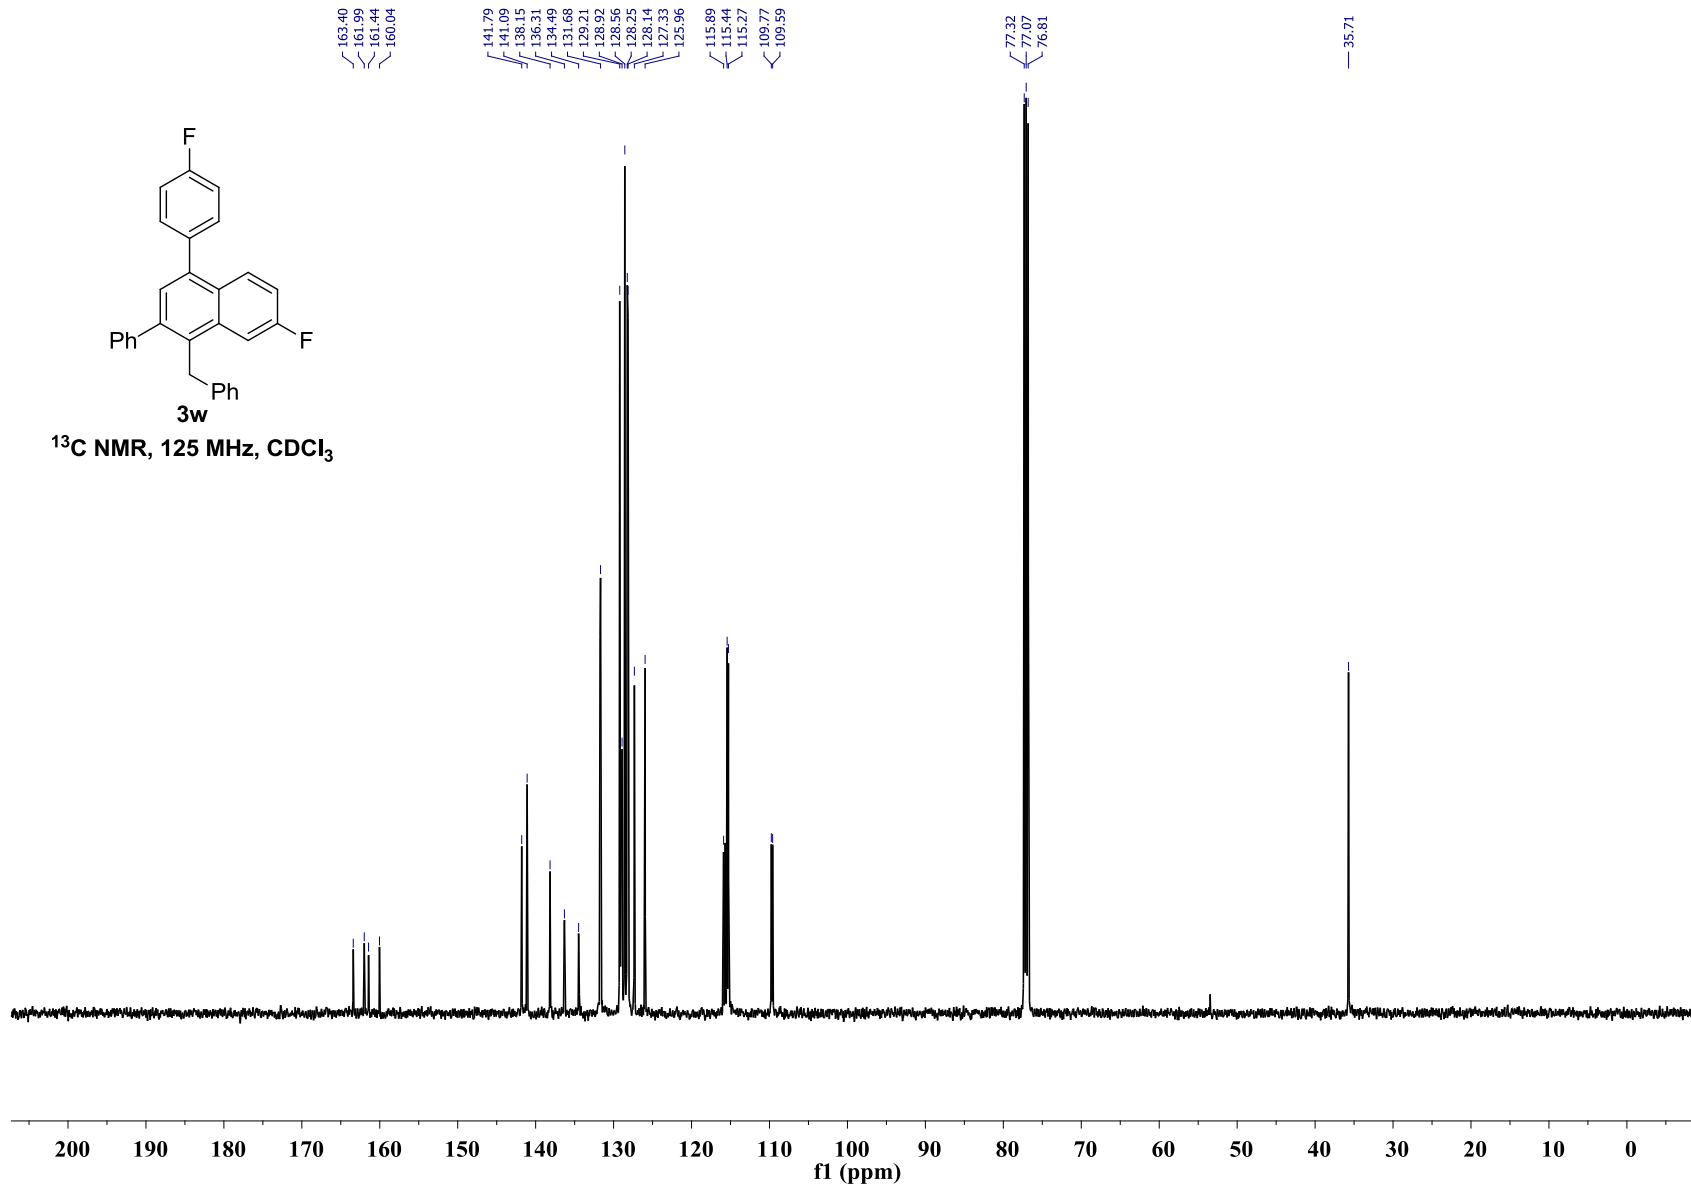



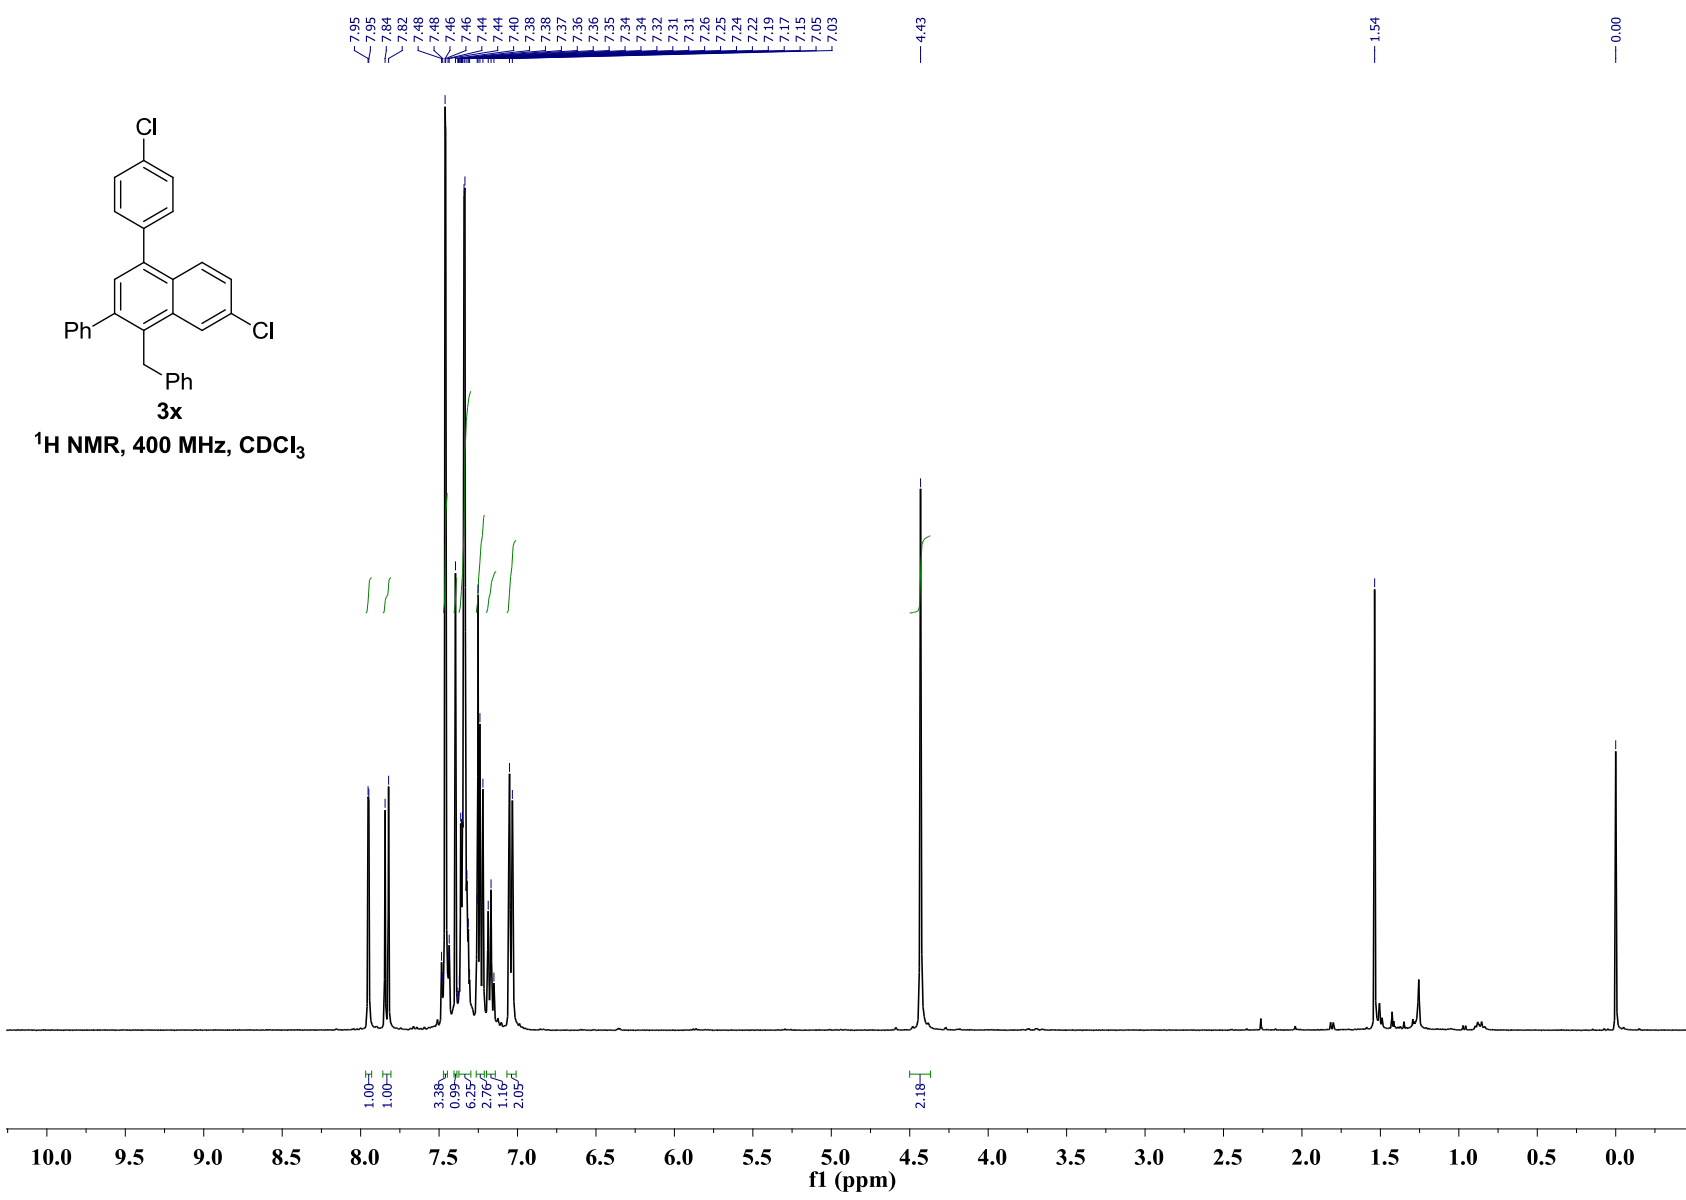

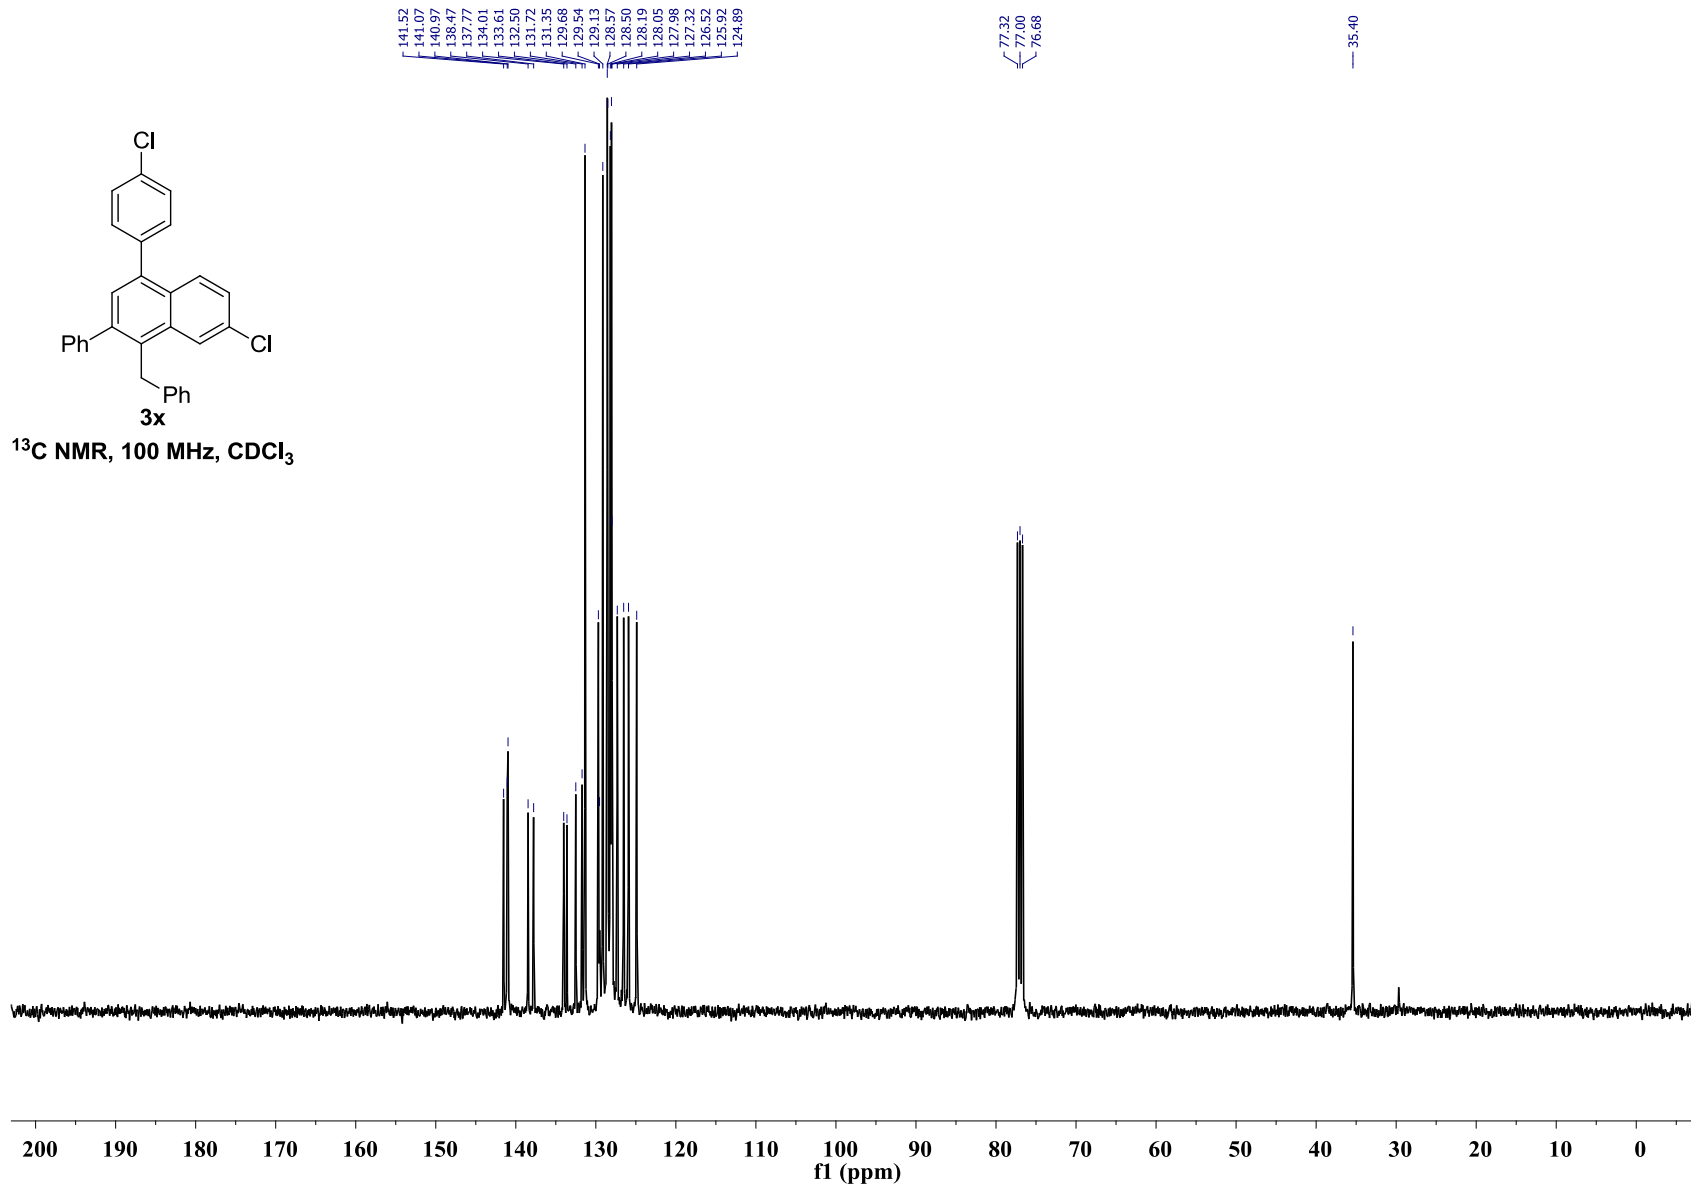

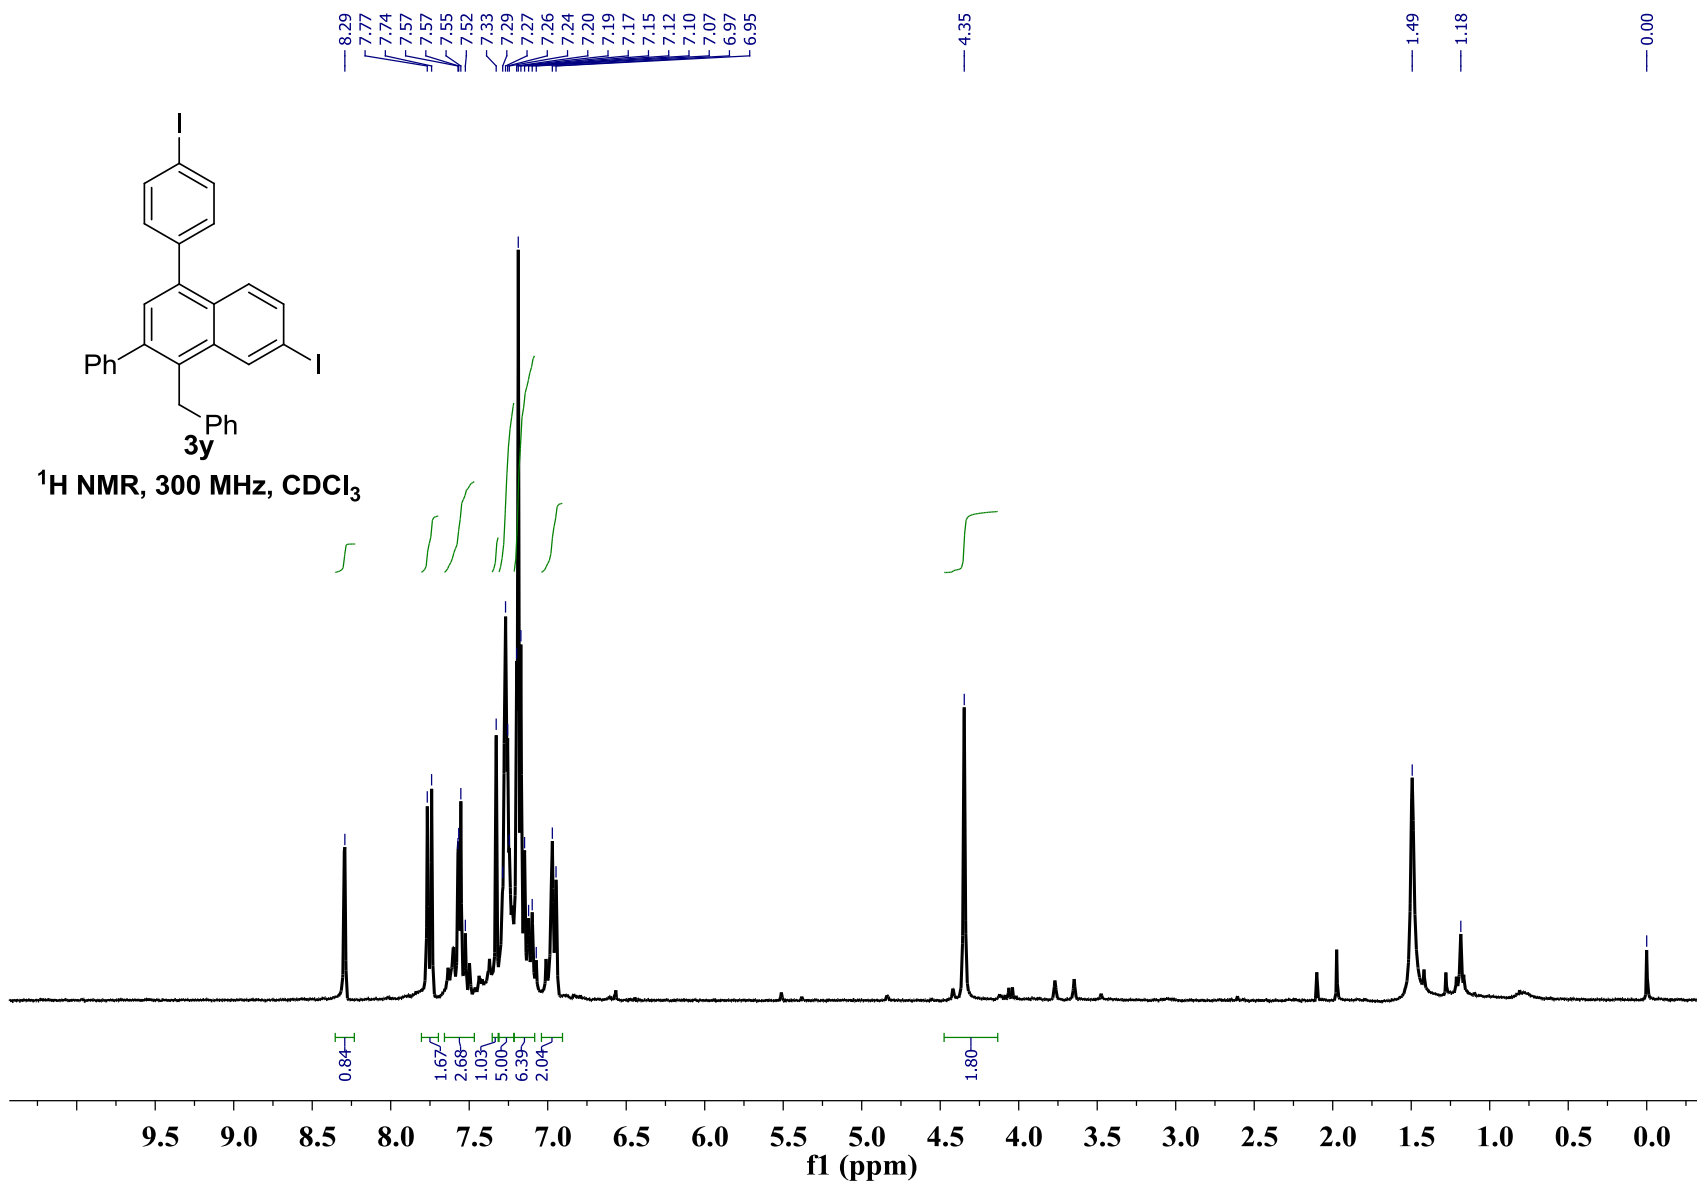

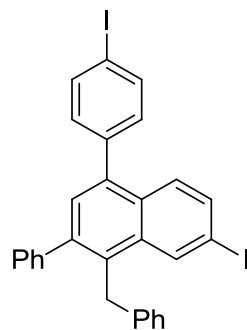

3y

$^{13}\text{C}$  NMR, 100 MHz,  $\text{CDCl}_3$

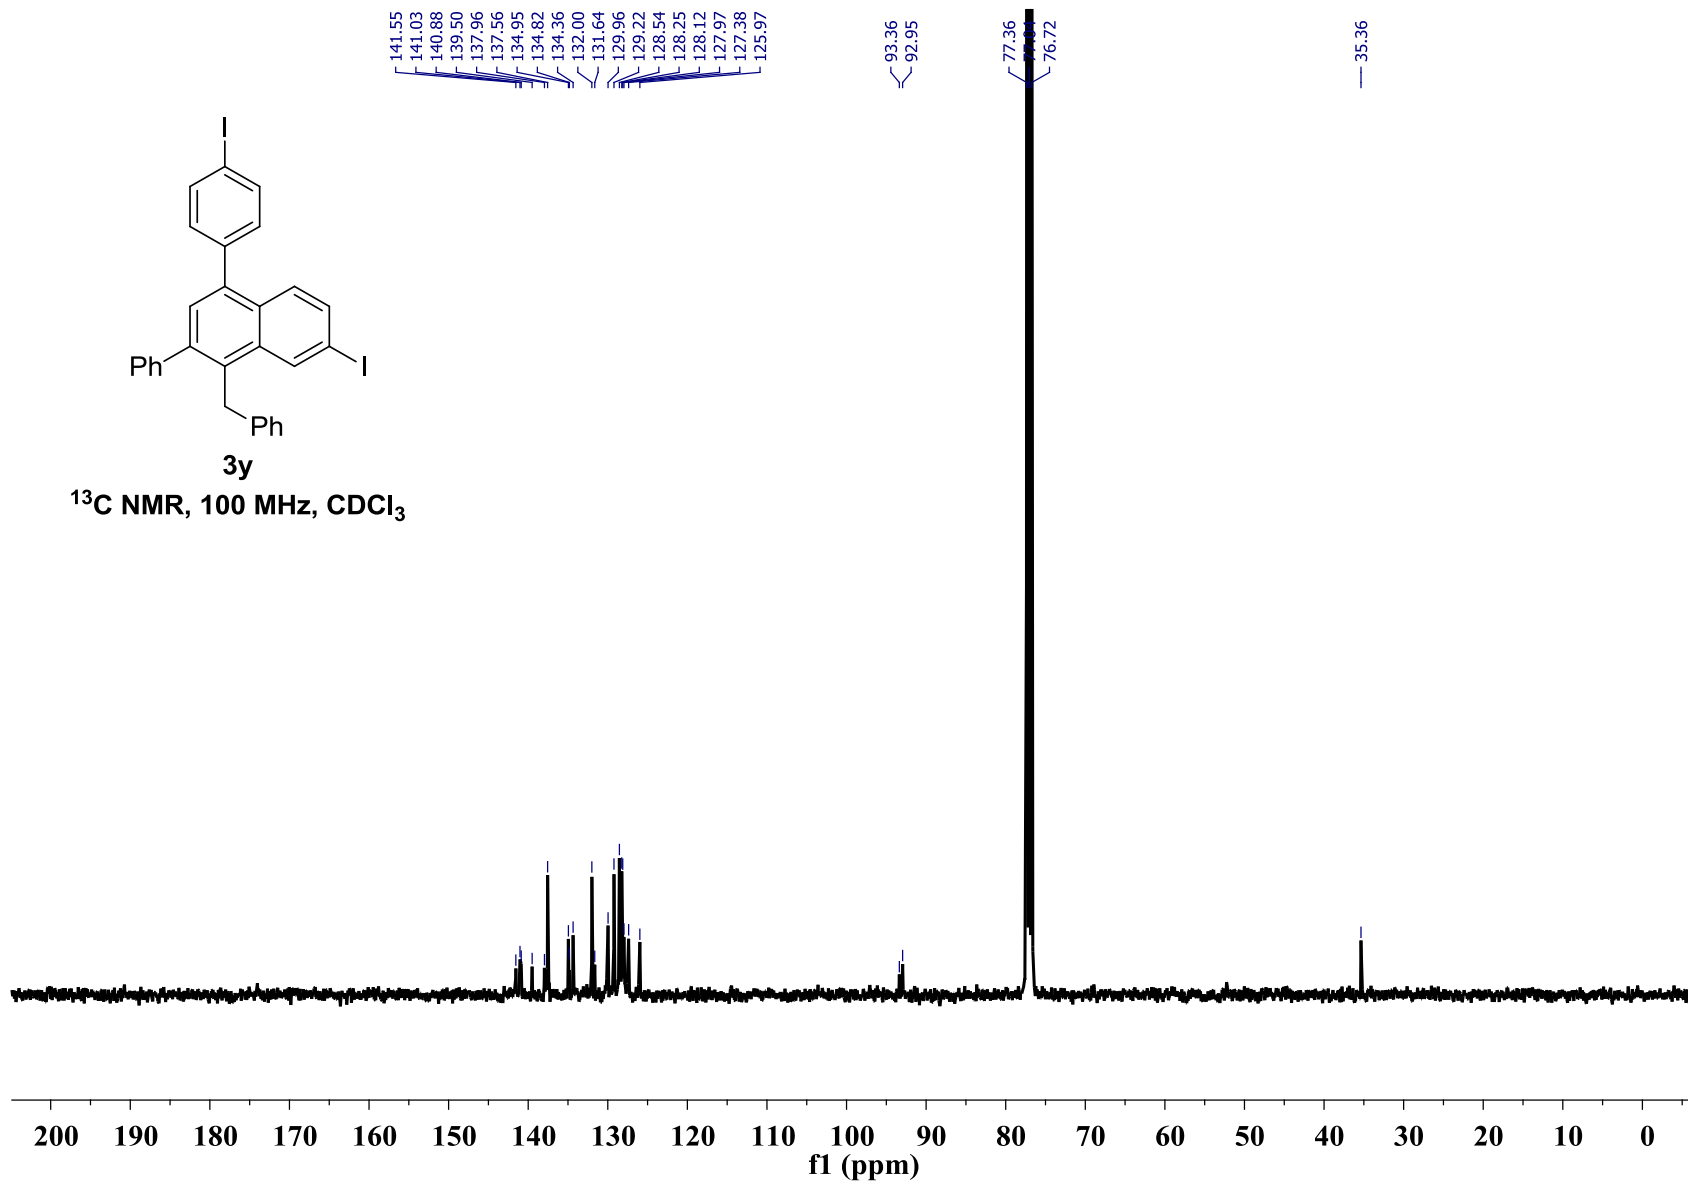

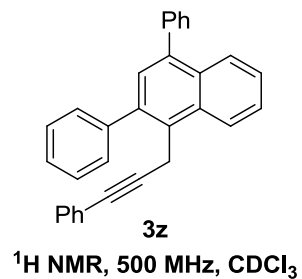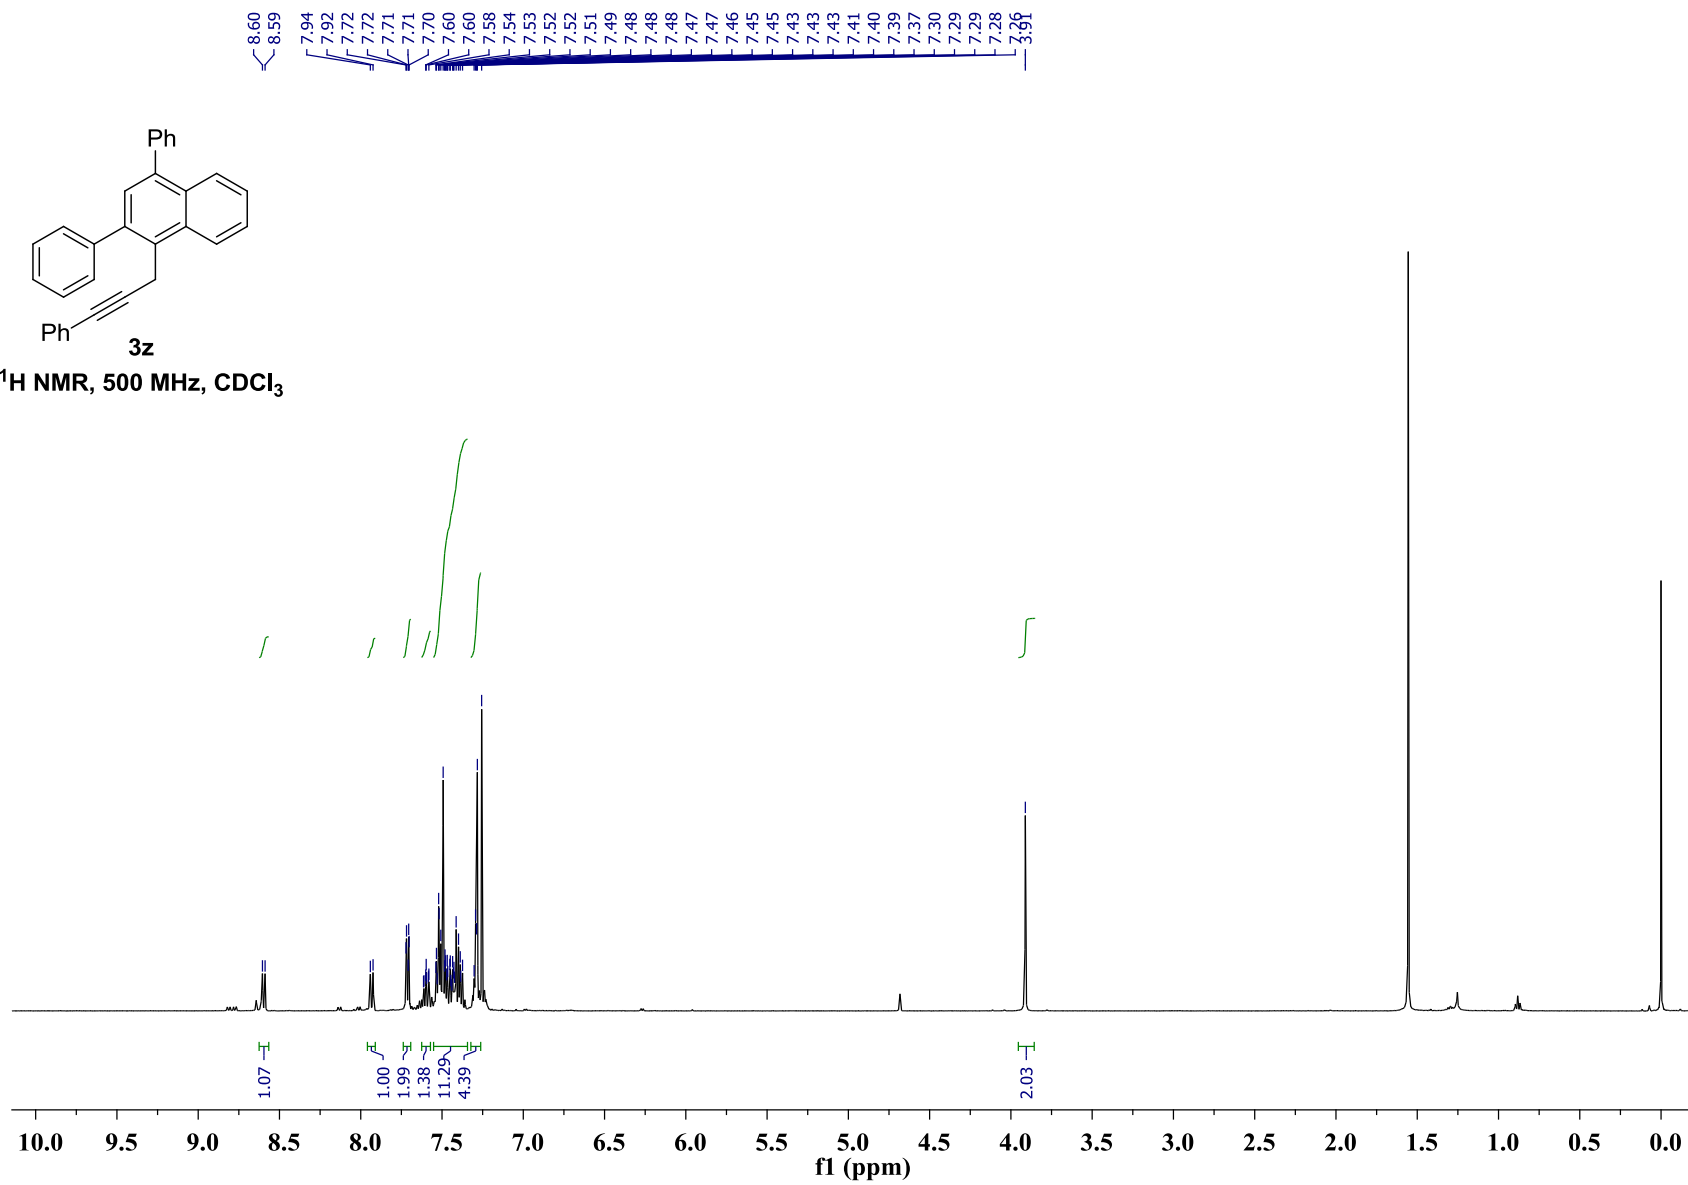

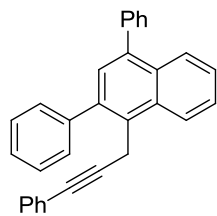

3z

$^{13}\text{C}$  NMR, 125 MHz,  $\text{CDCl}_3$

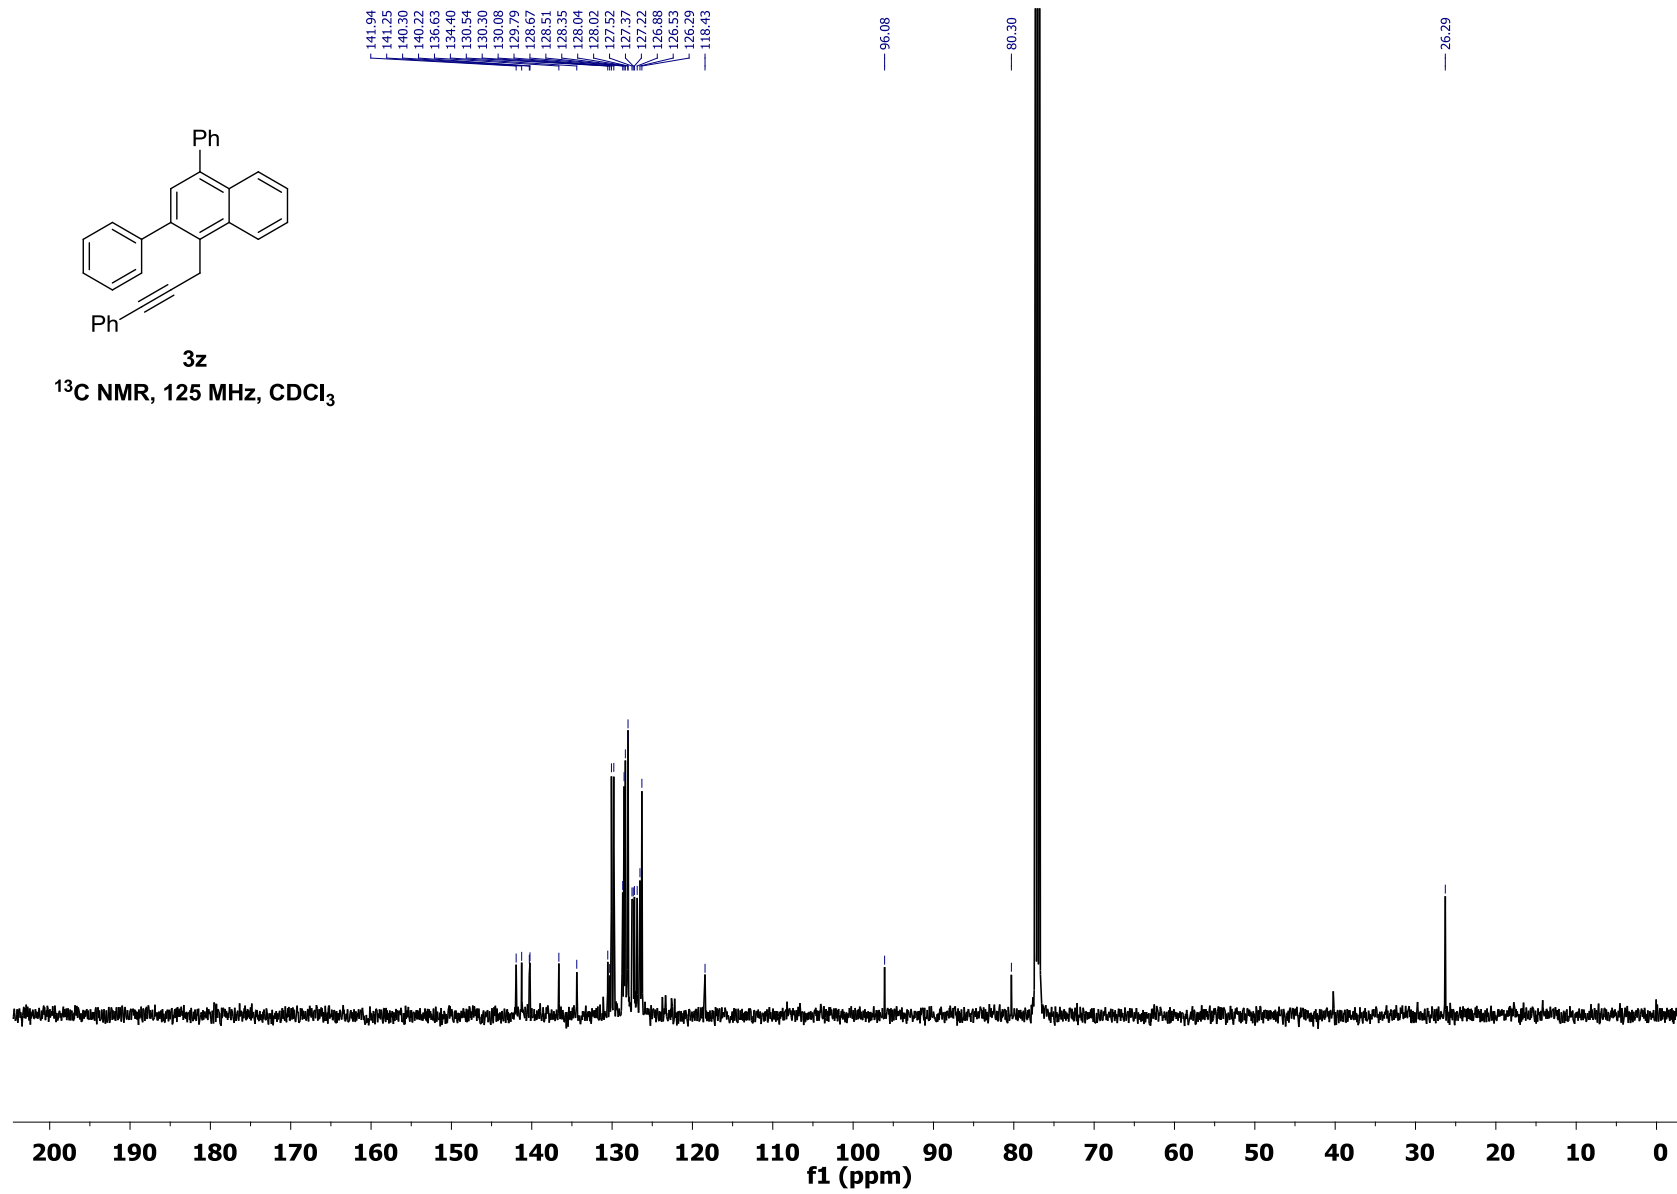

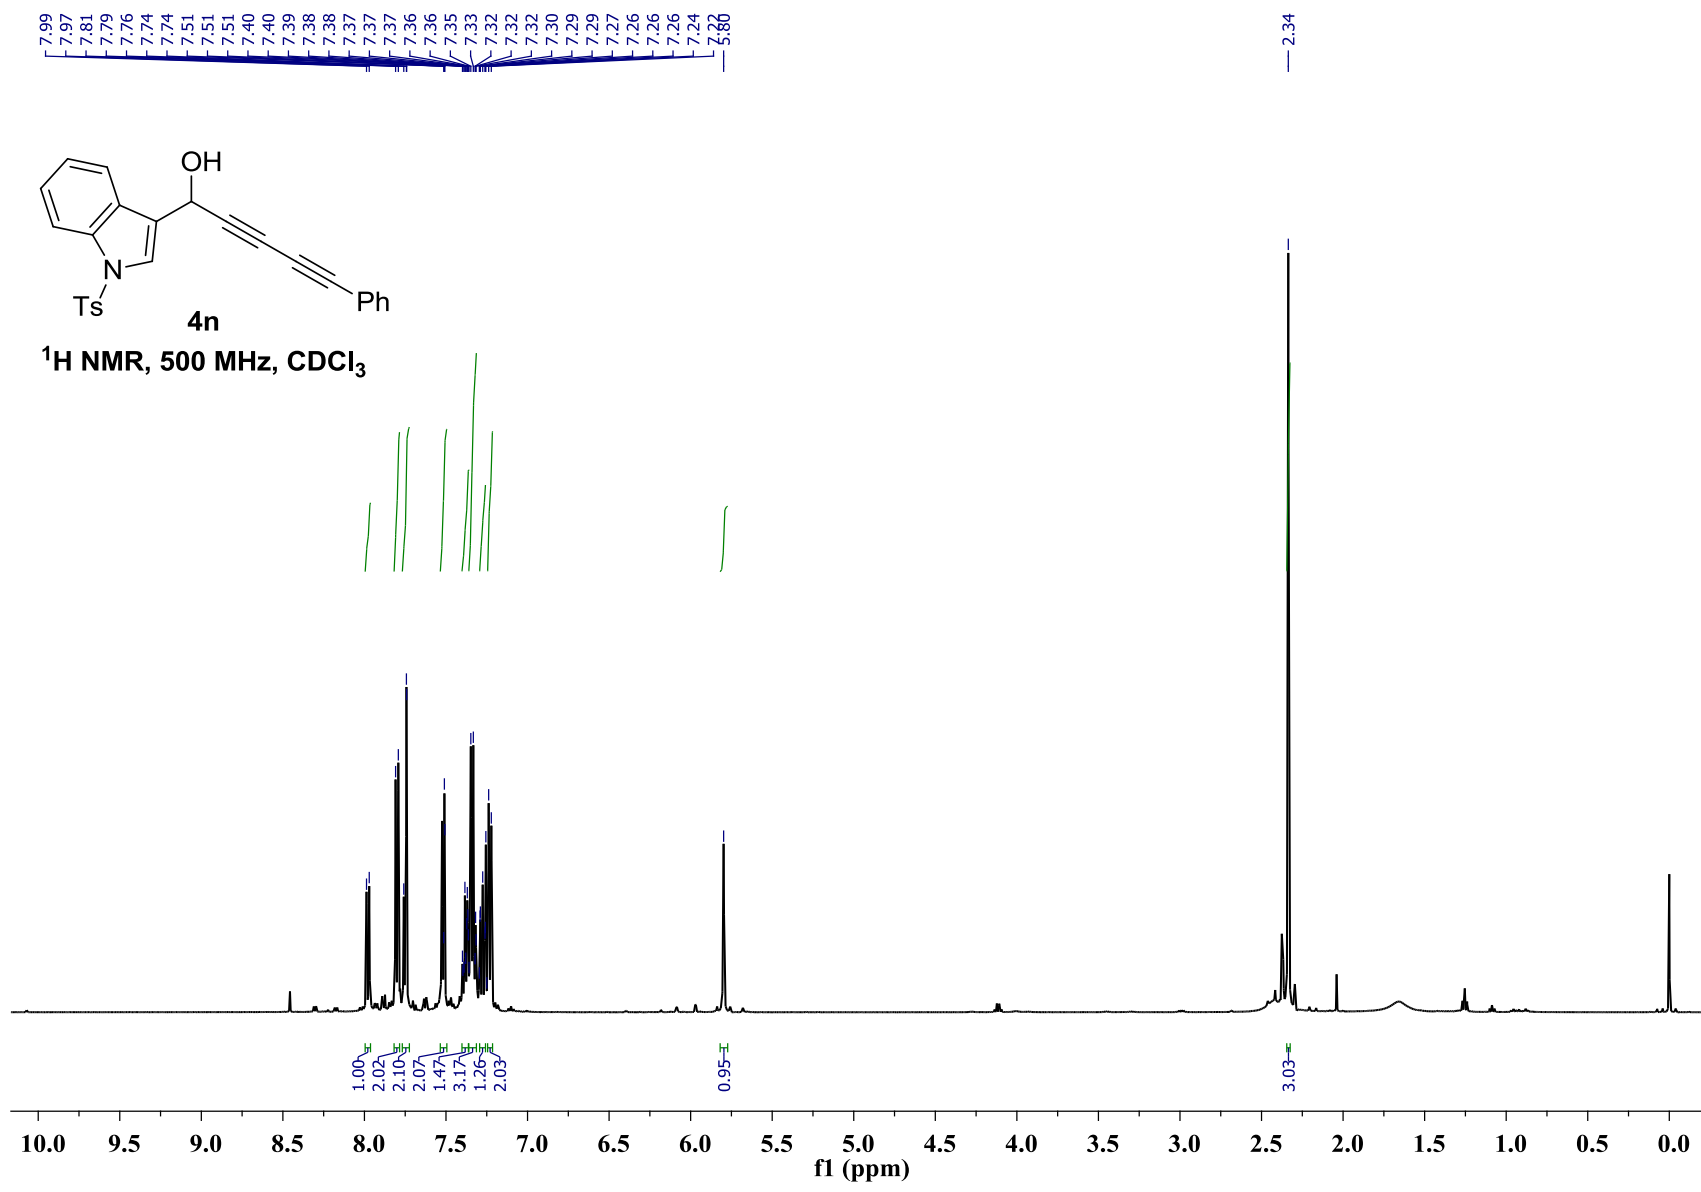

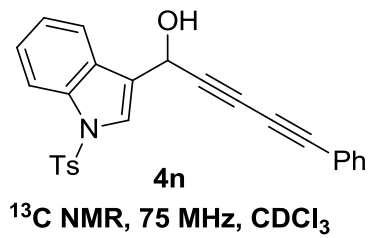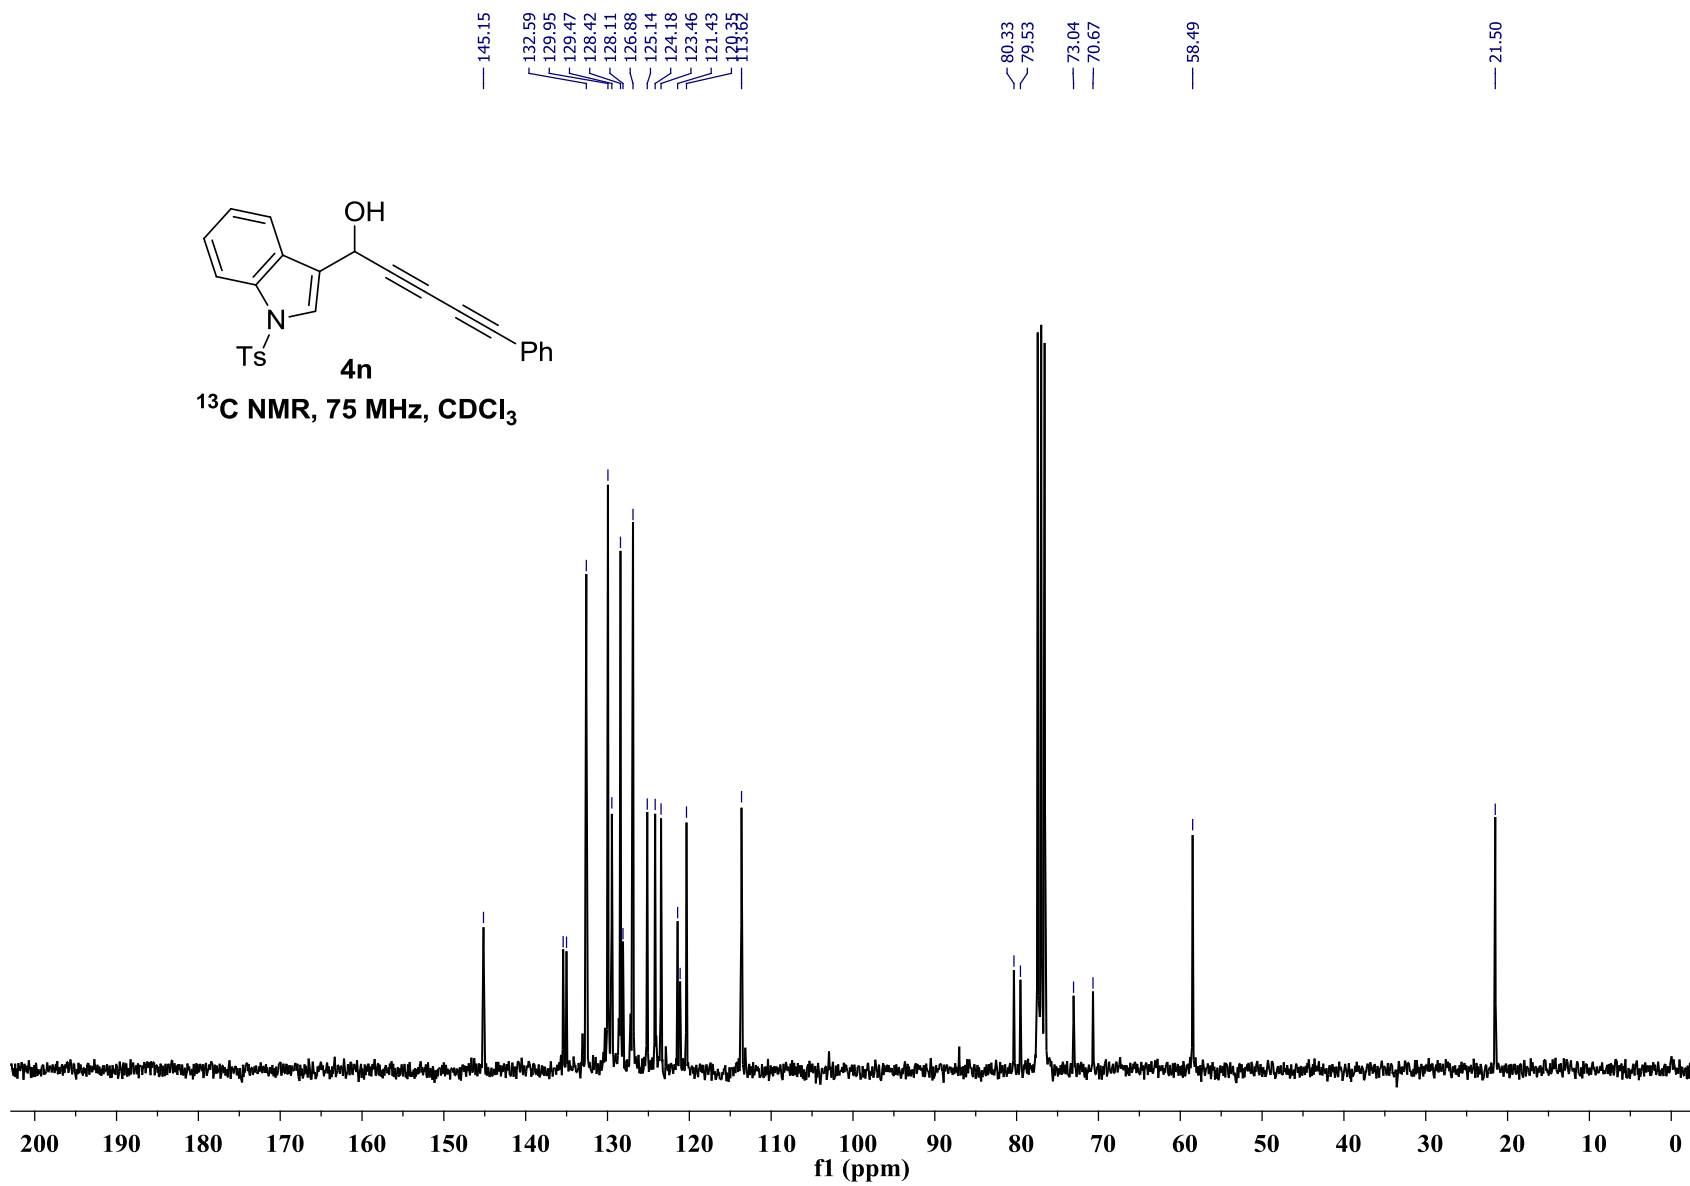



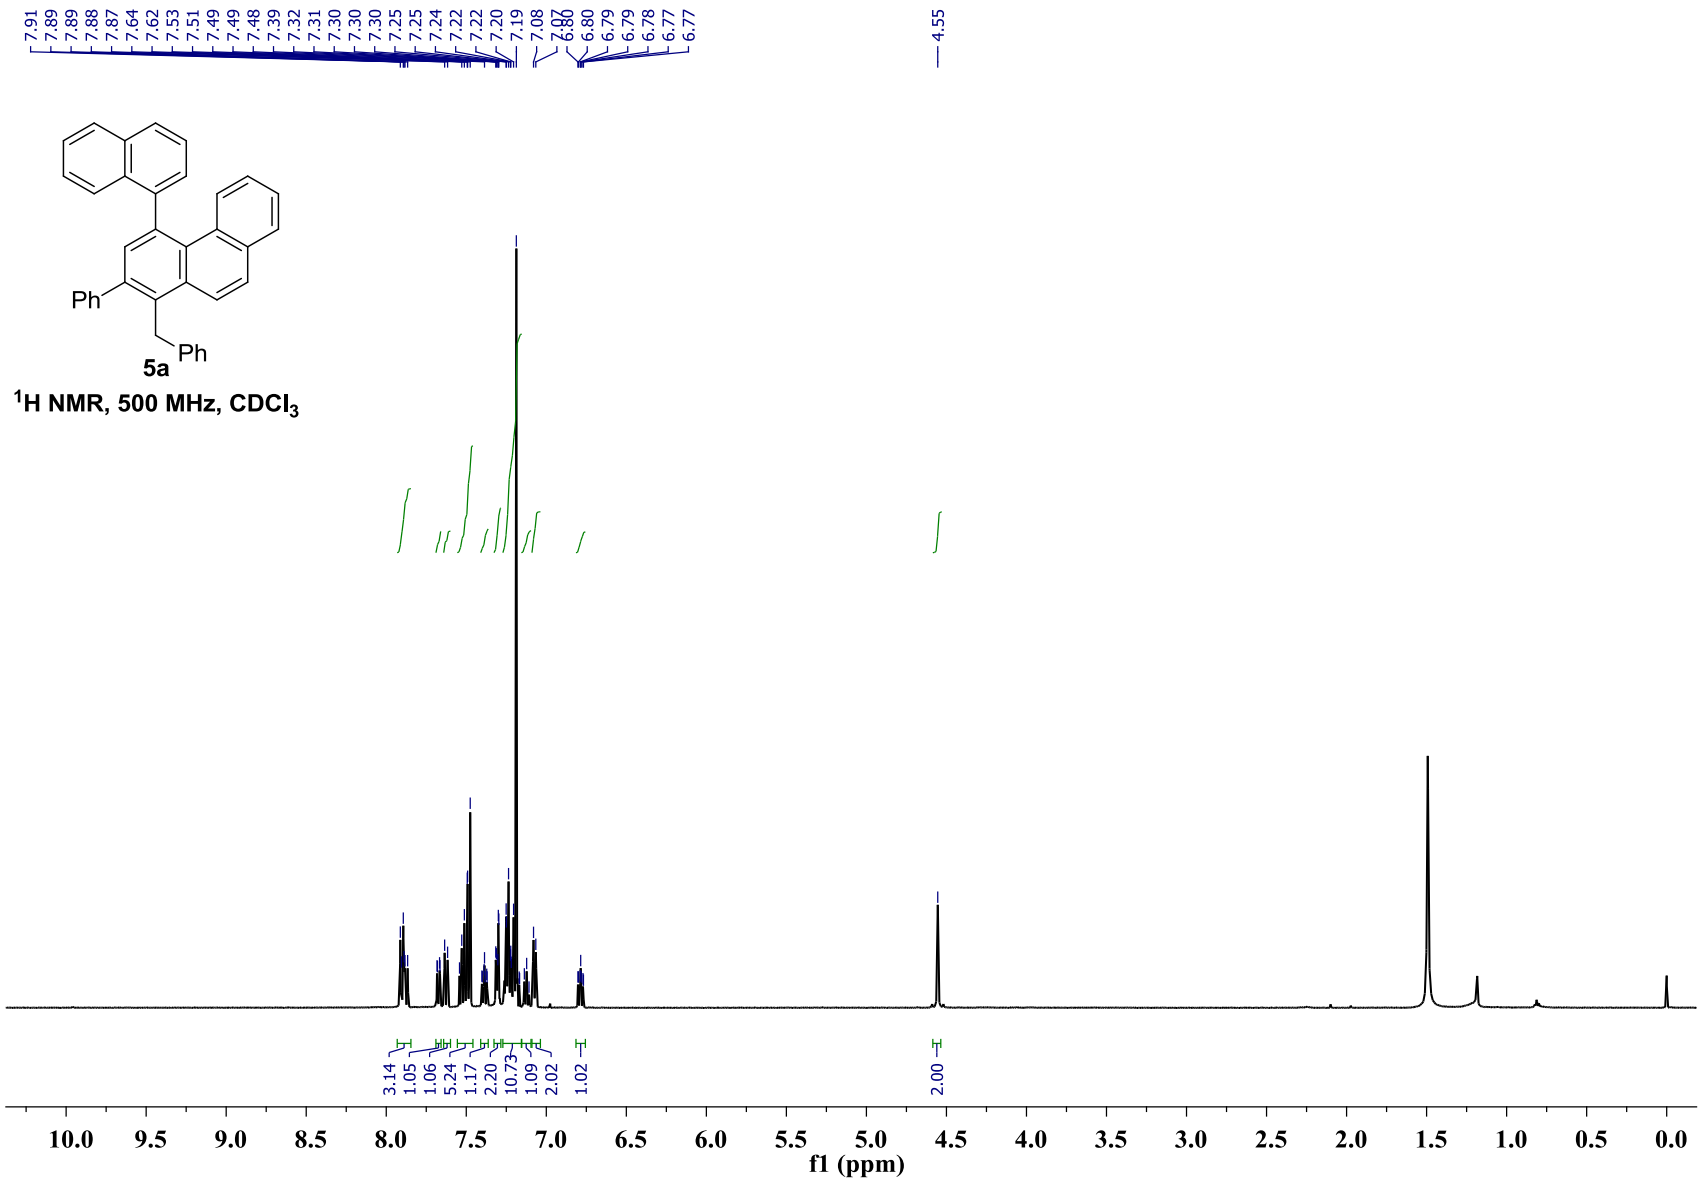

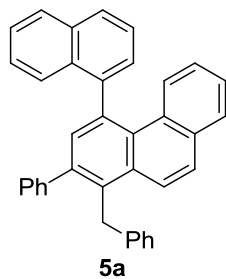

<sup>13</sup>C NMR, 125 MHz, CDCl<sub>3</sub>

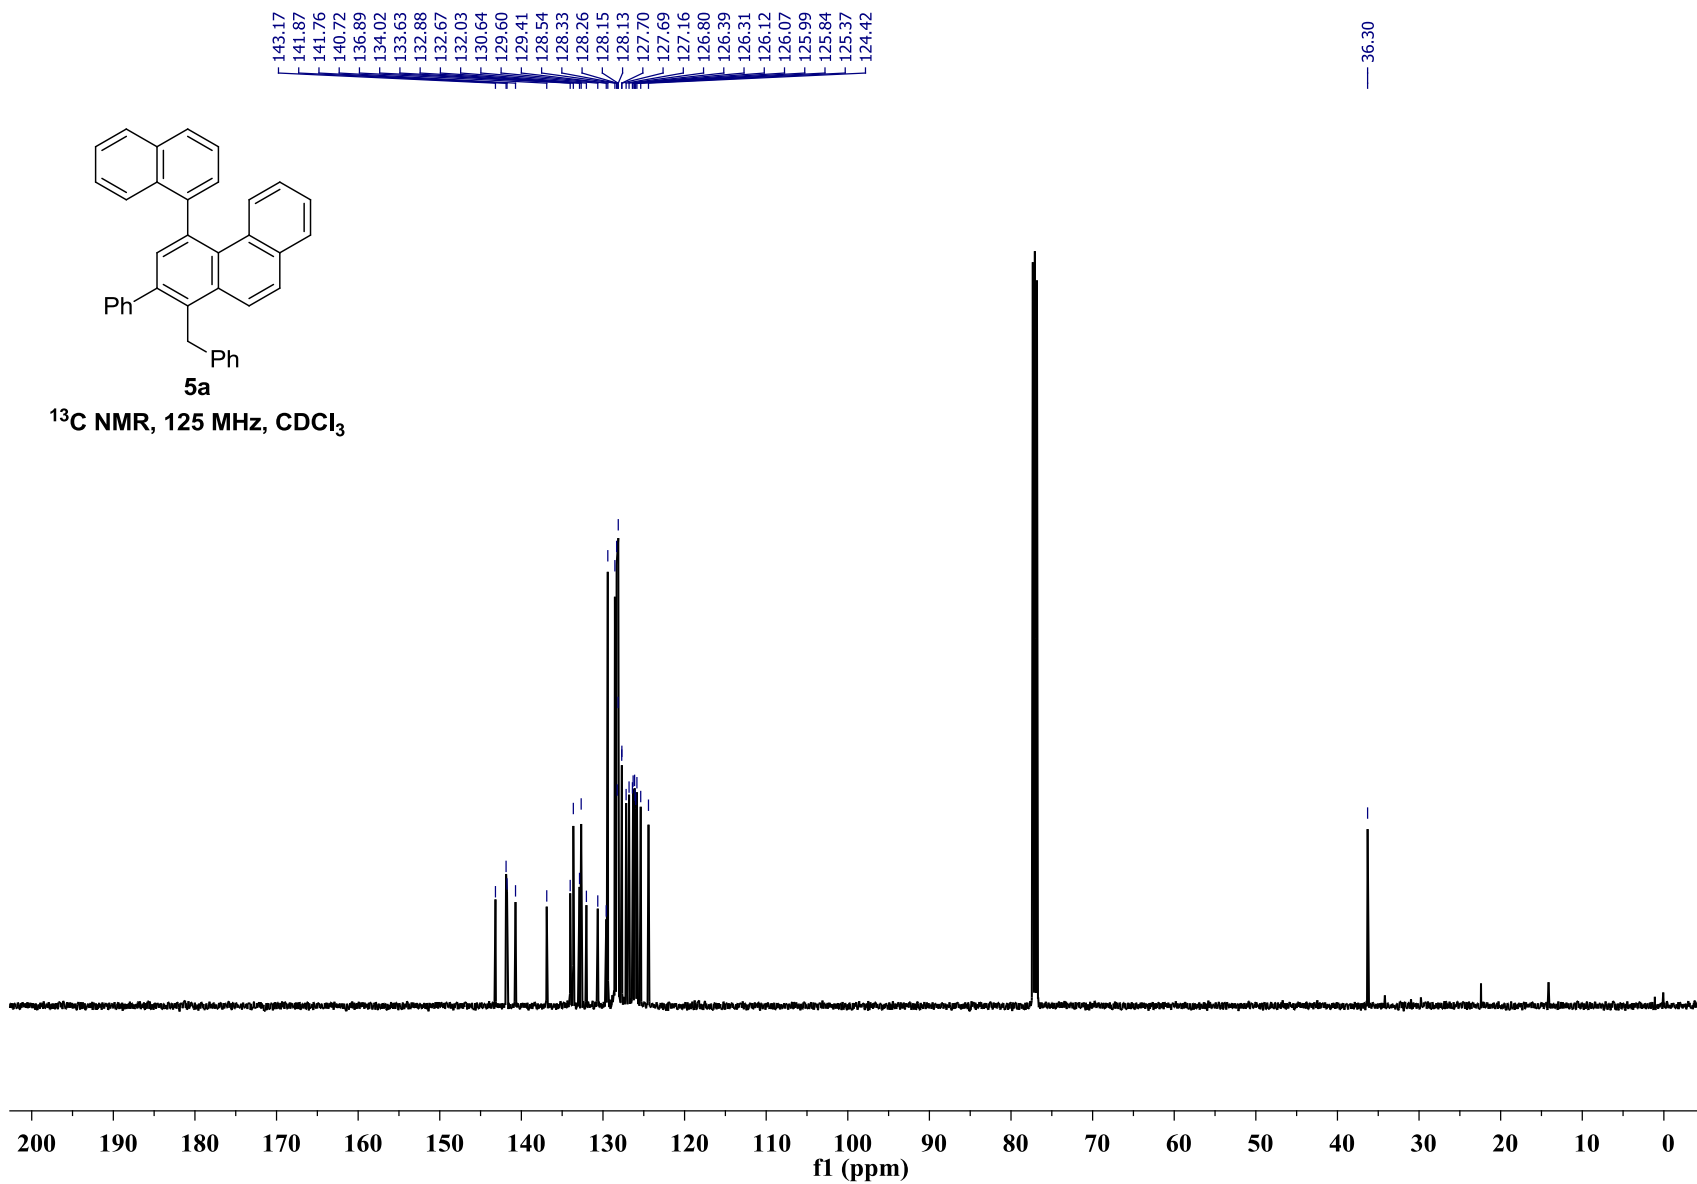

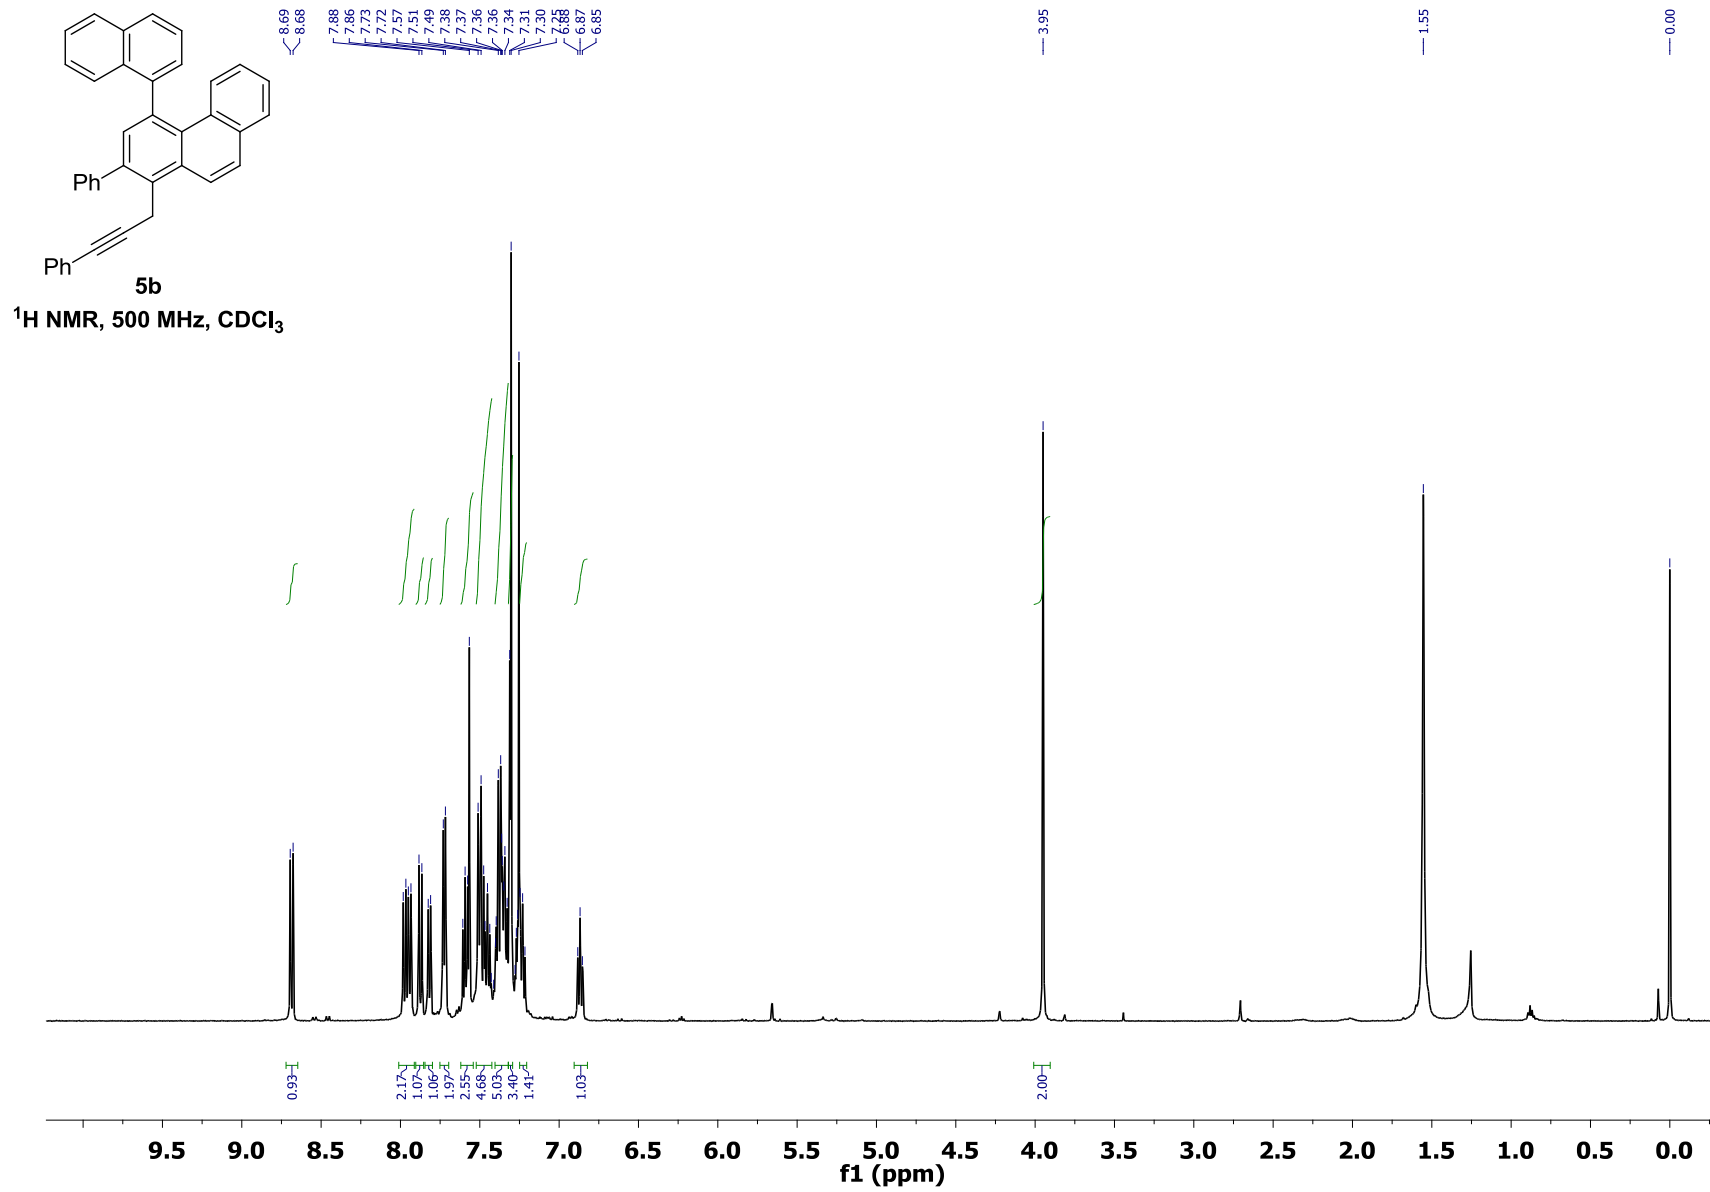

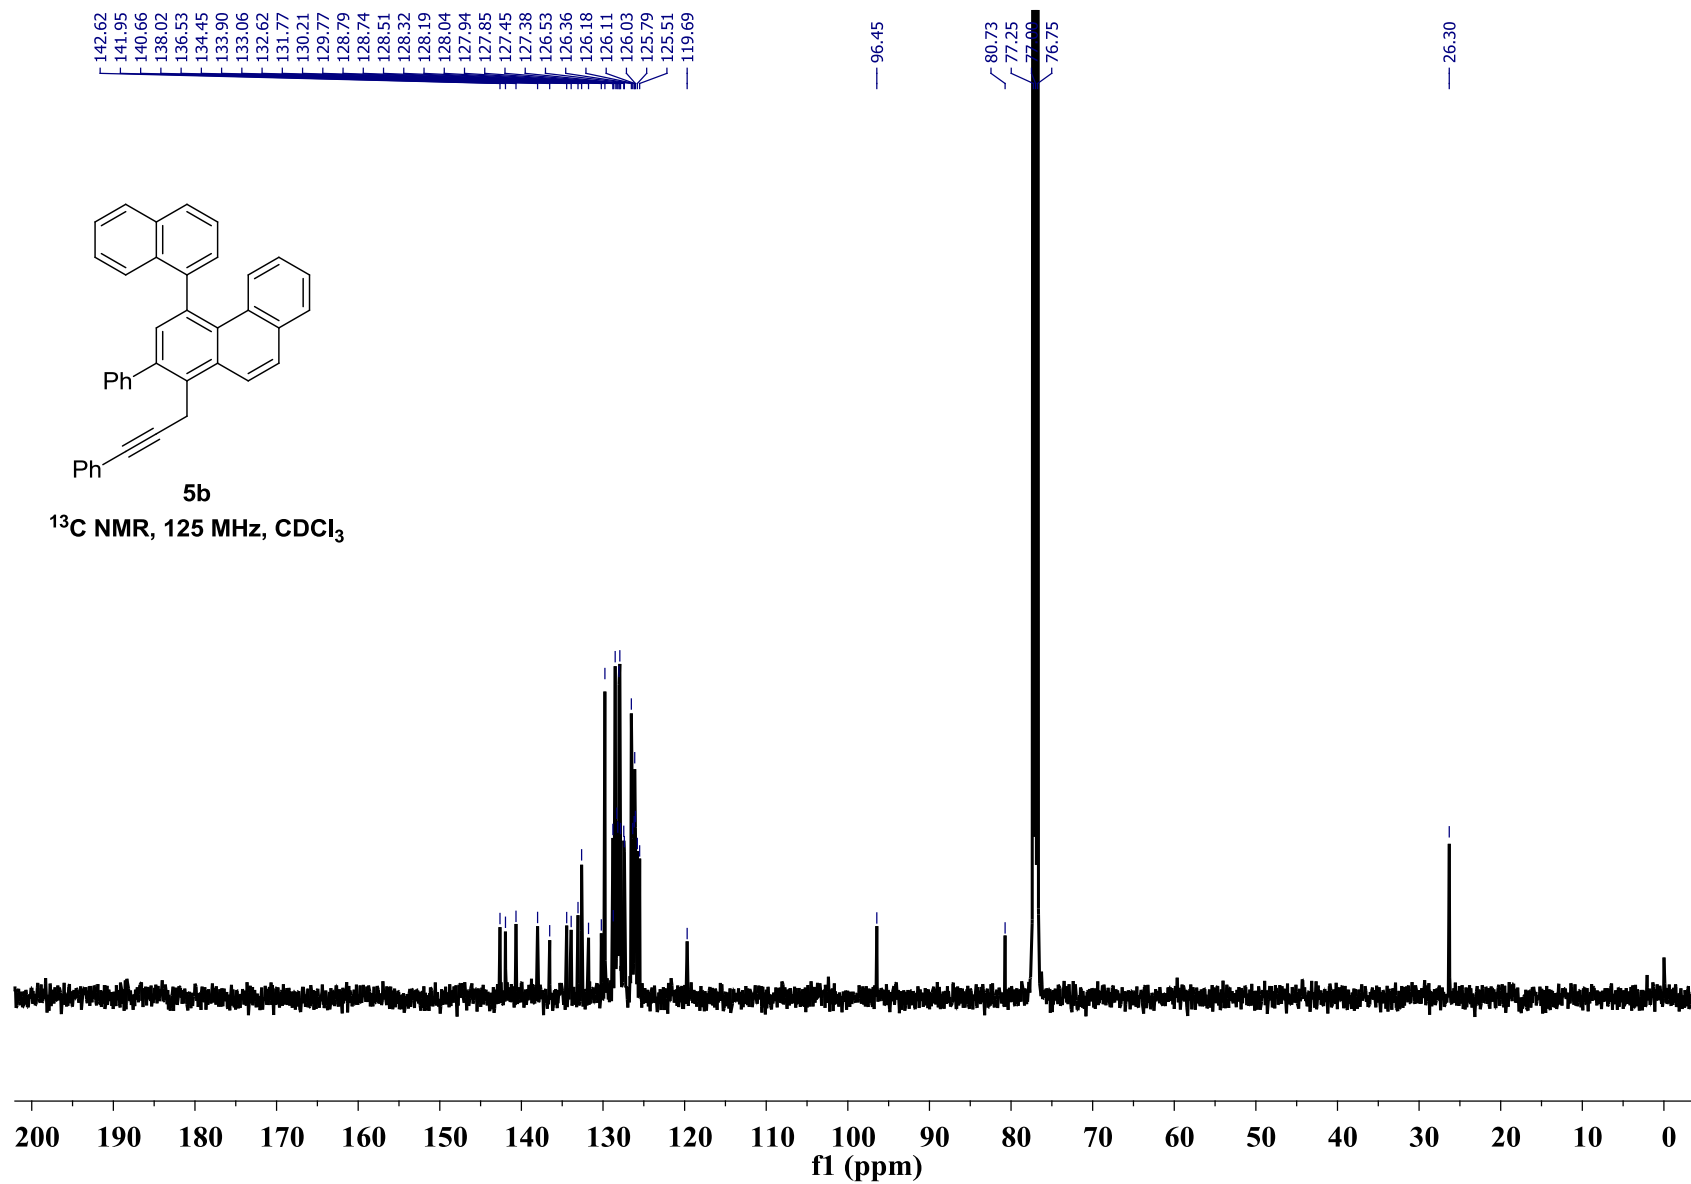

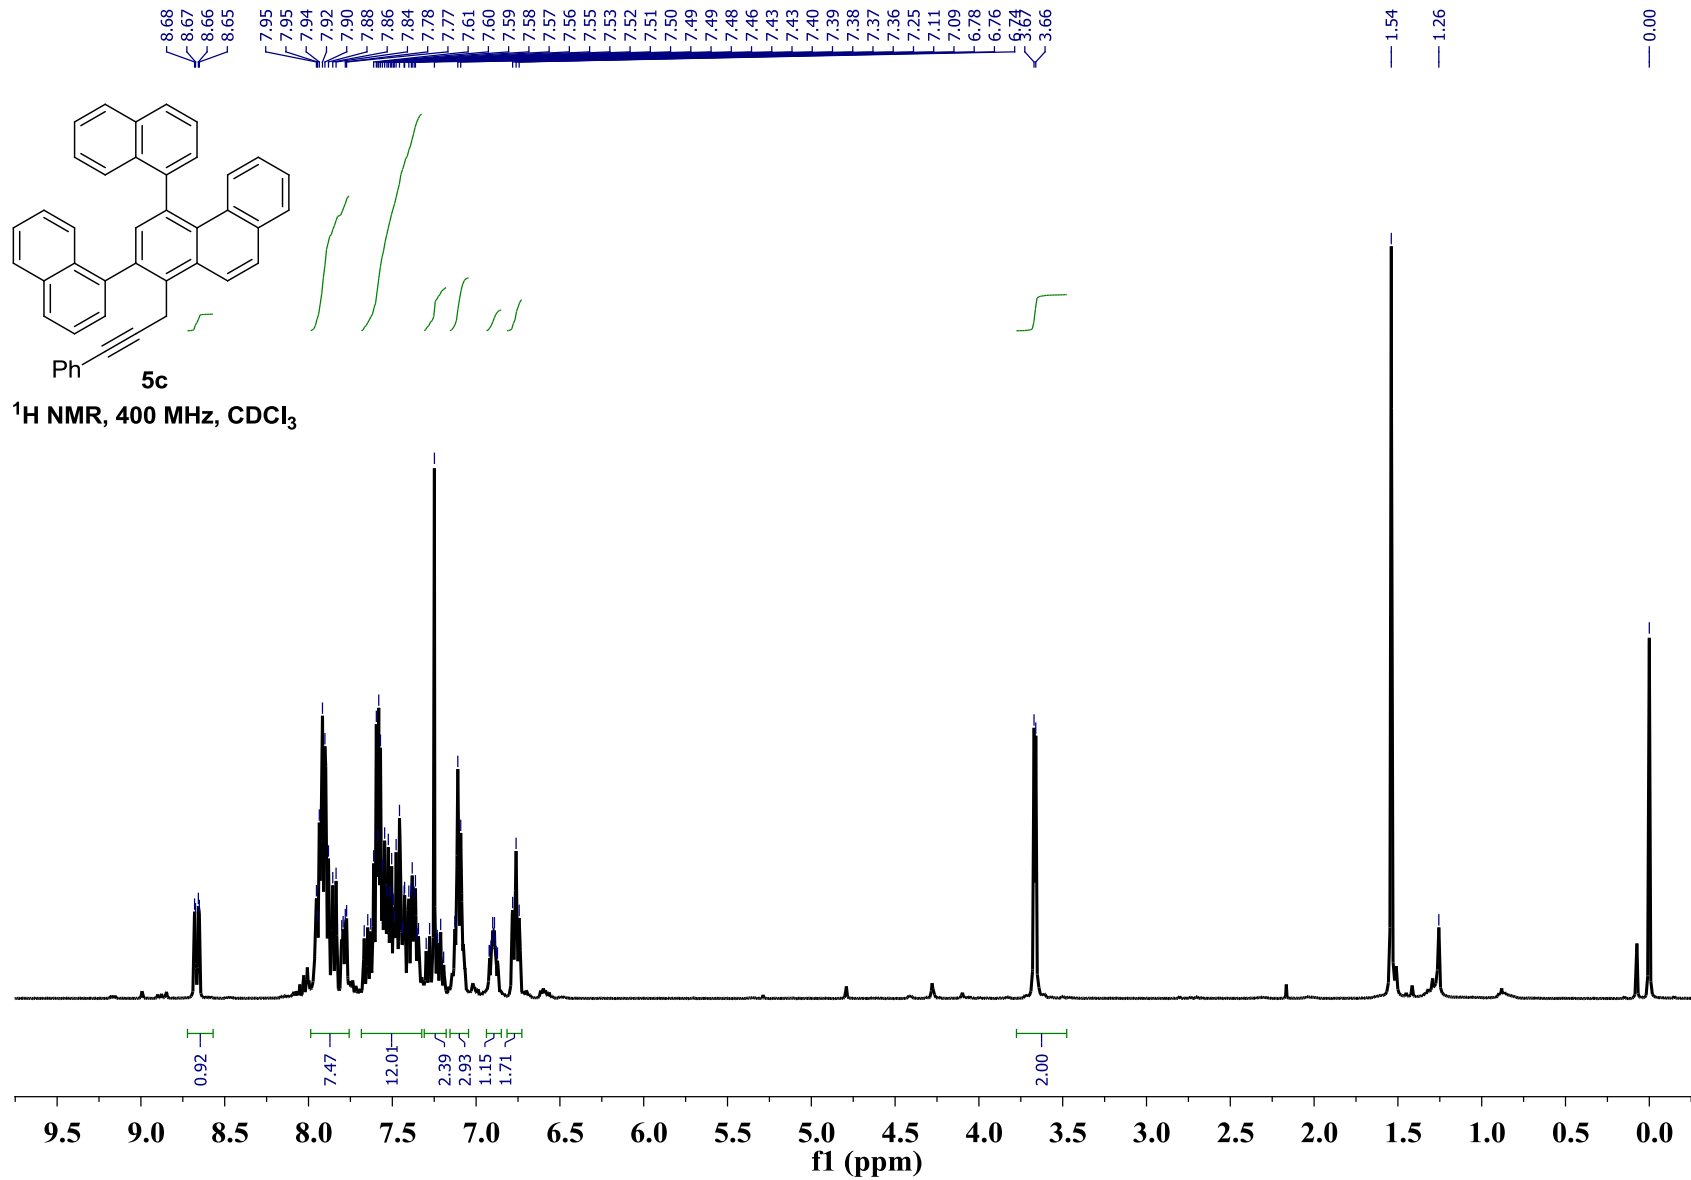

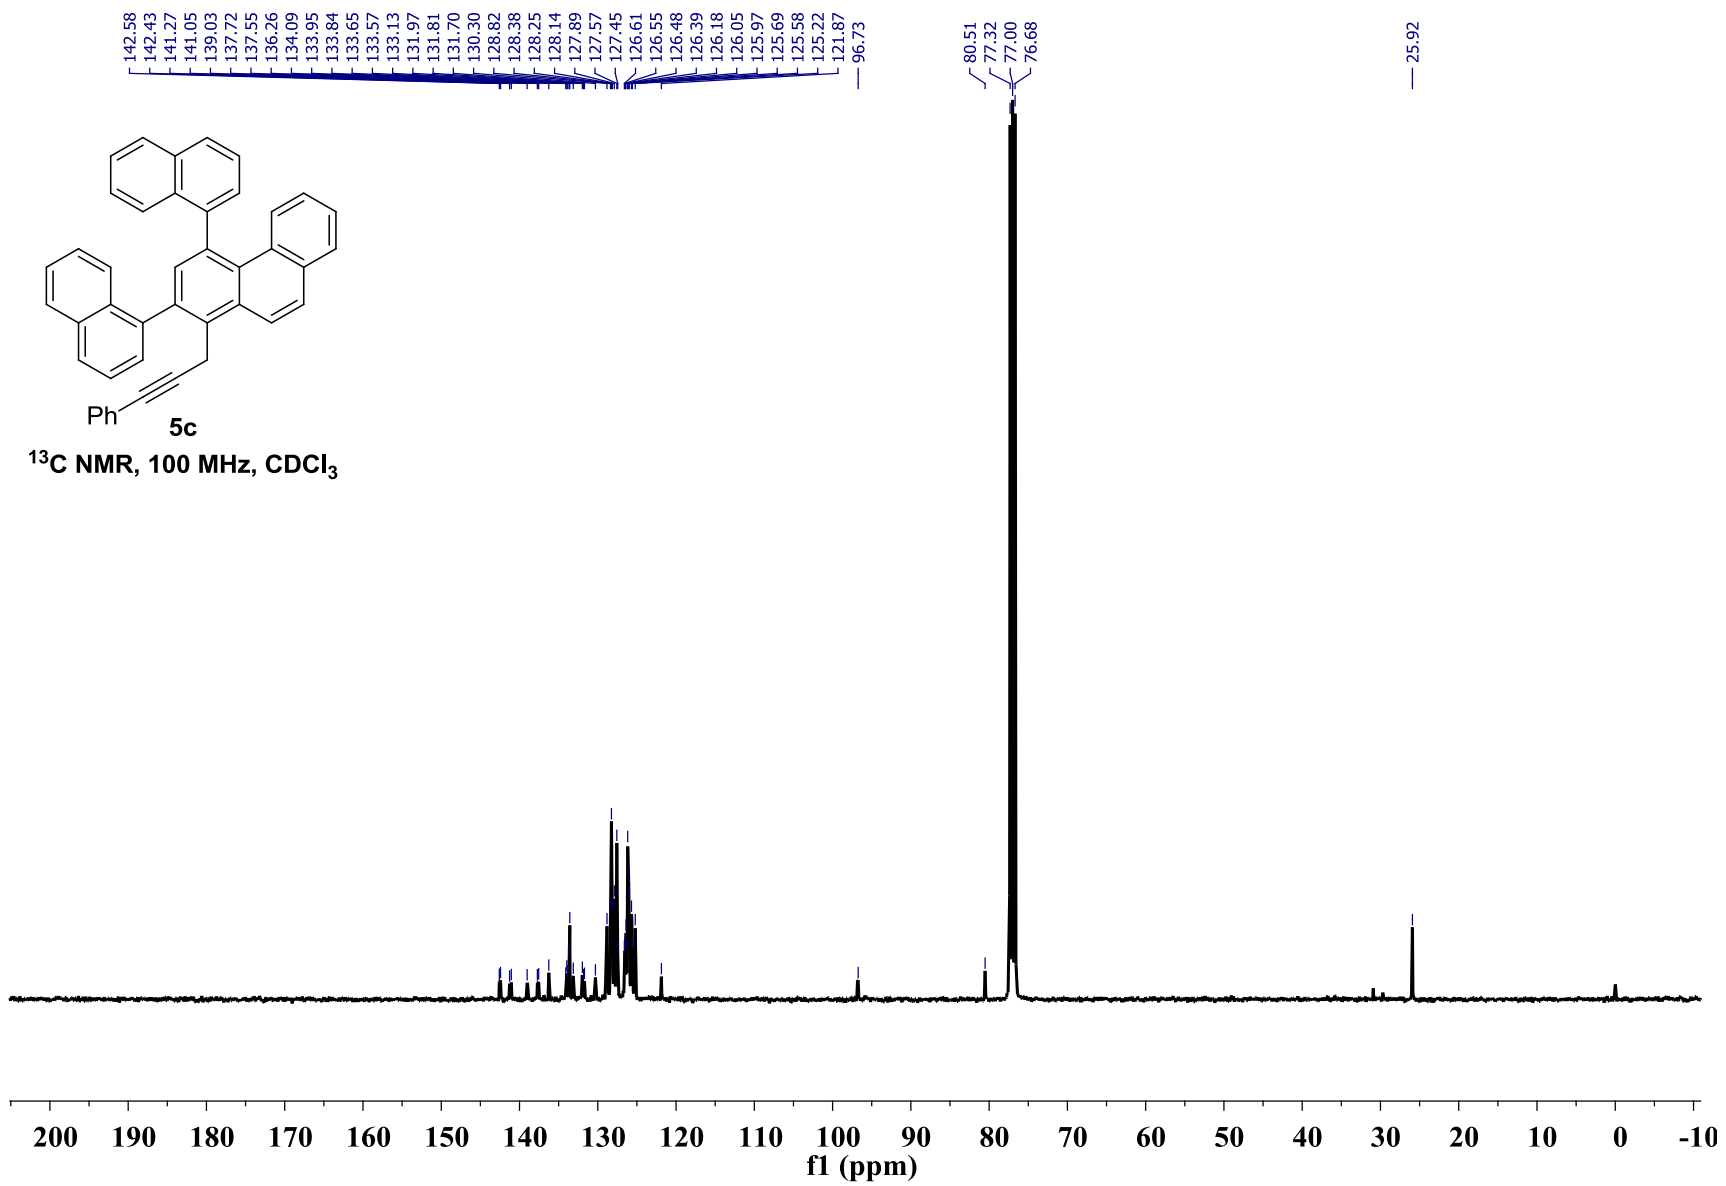

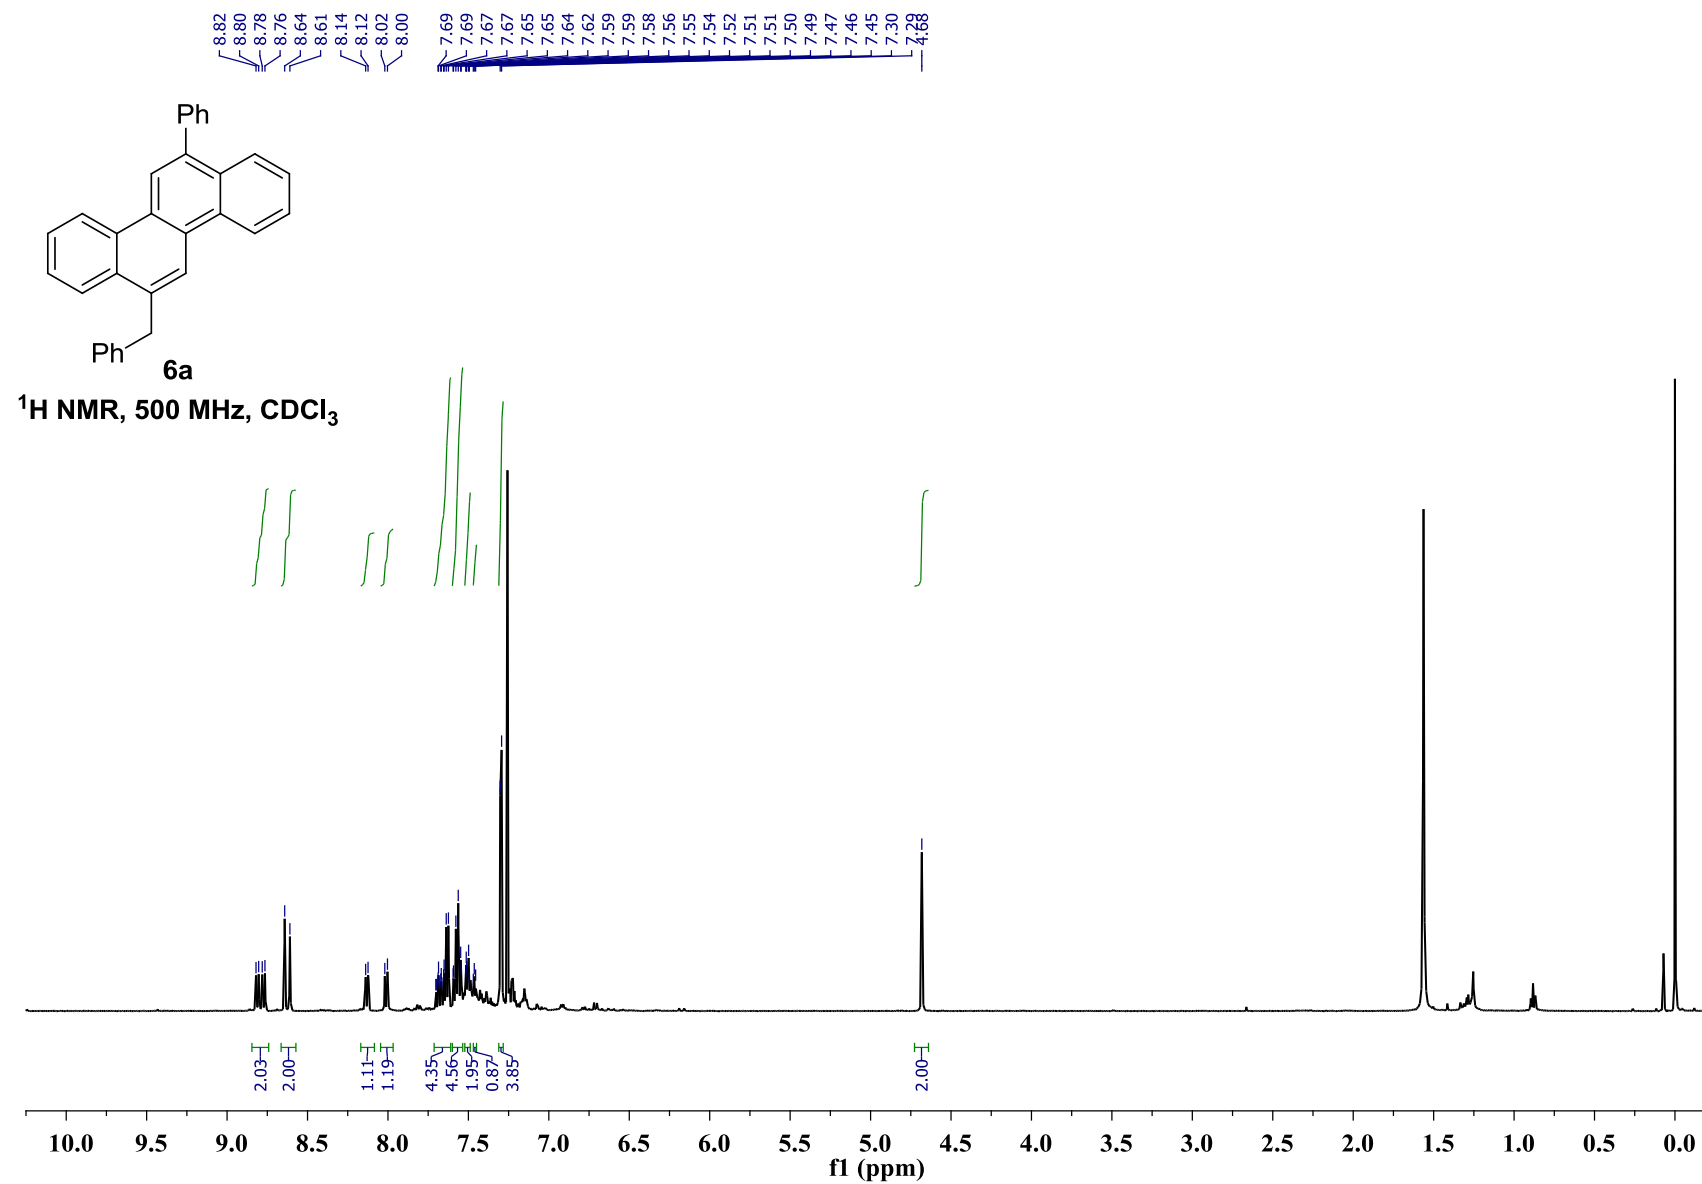

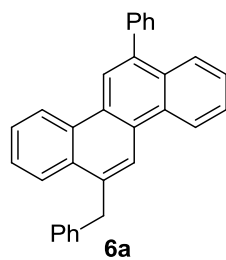

<sup>13</sup>C NMR, 100 MHz, CDCl<sub>3</sub>

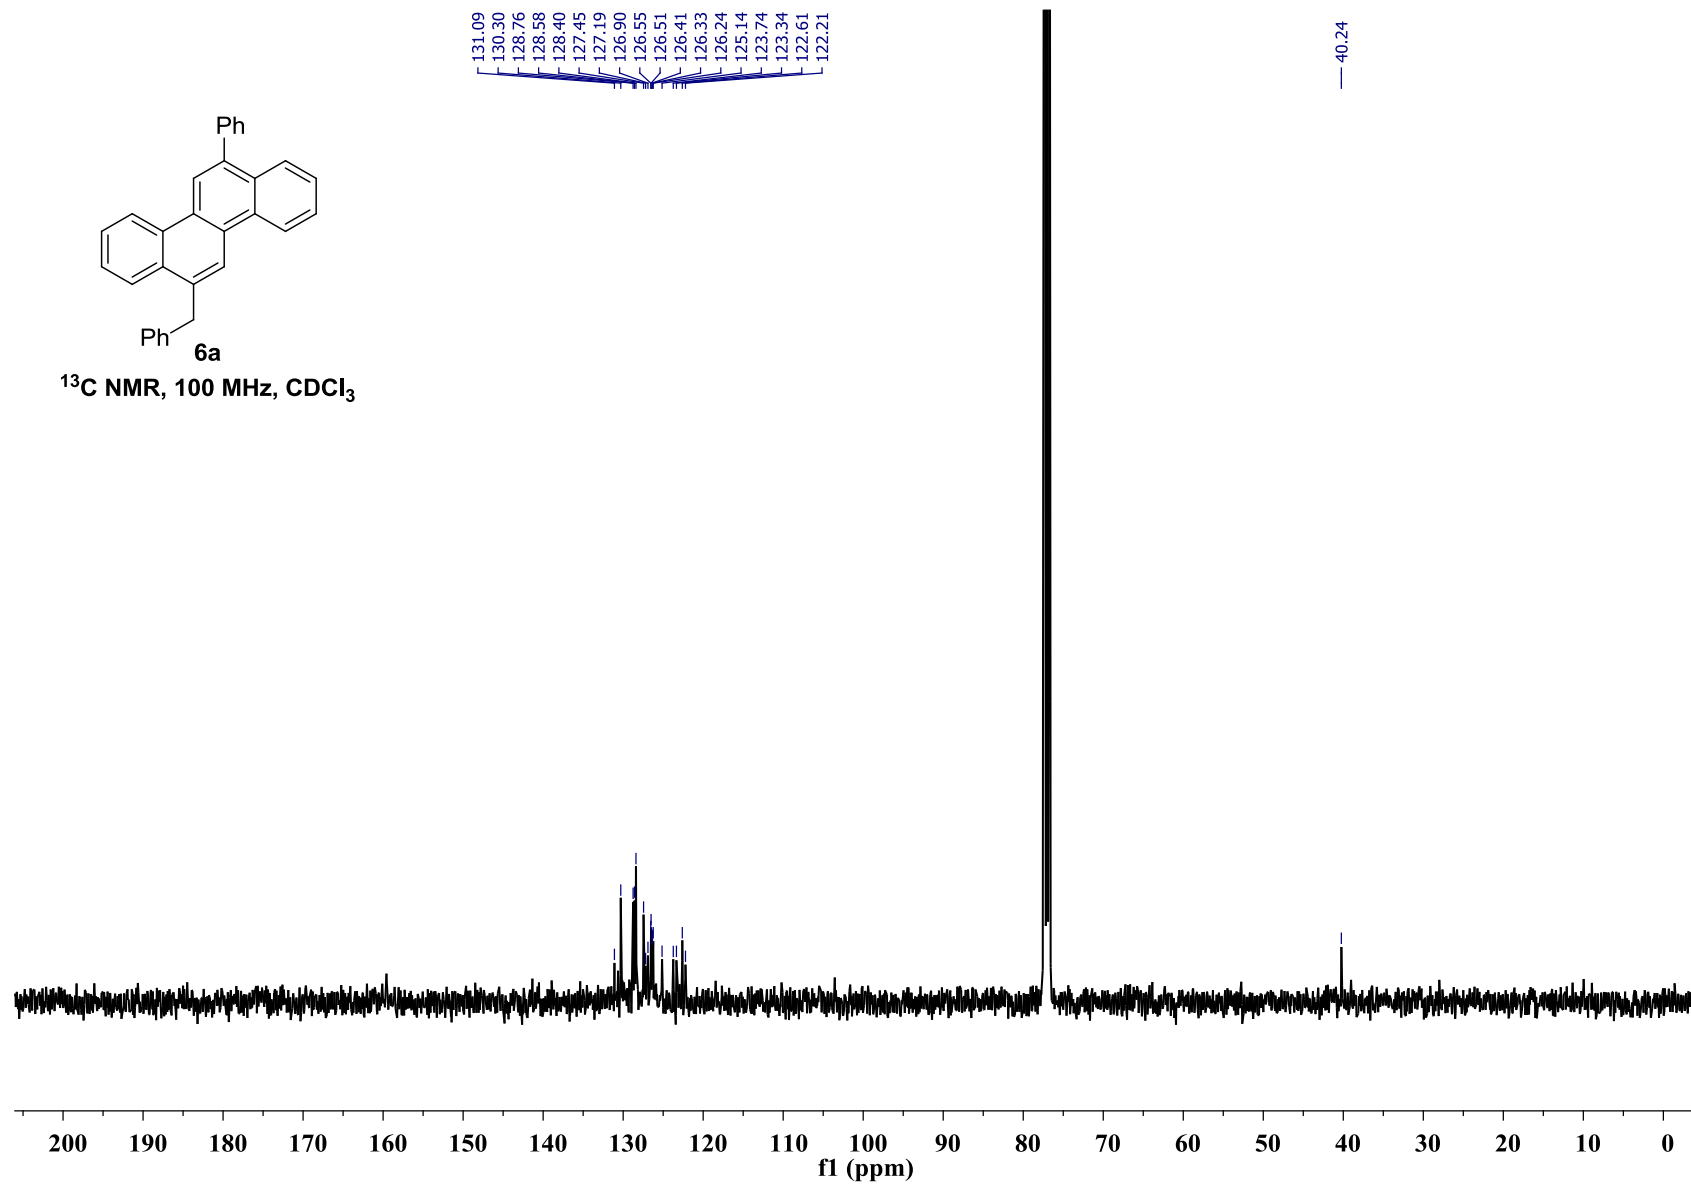



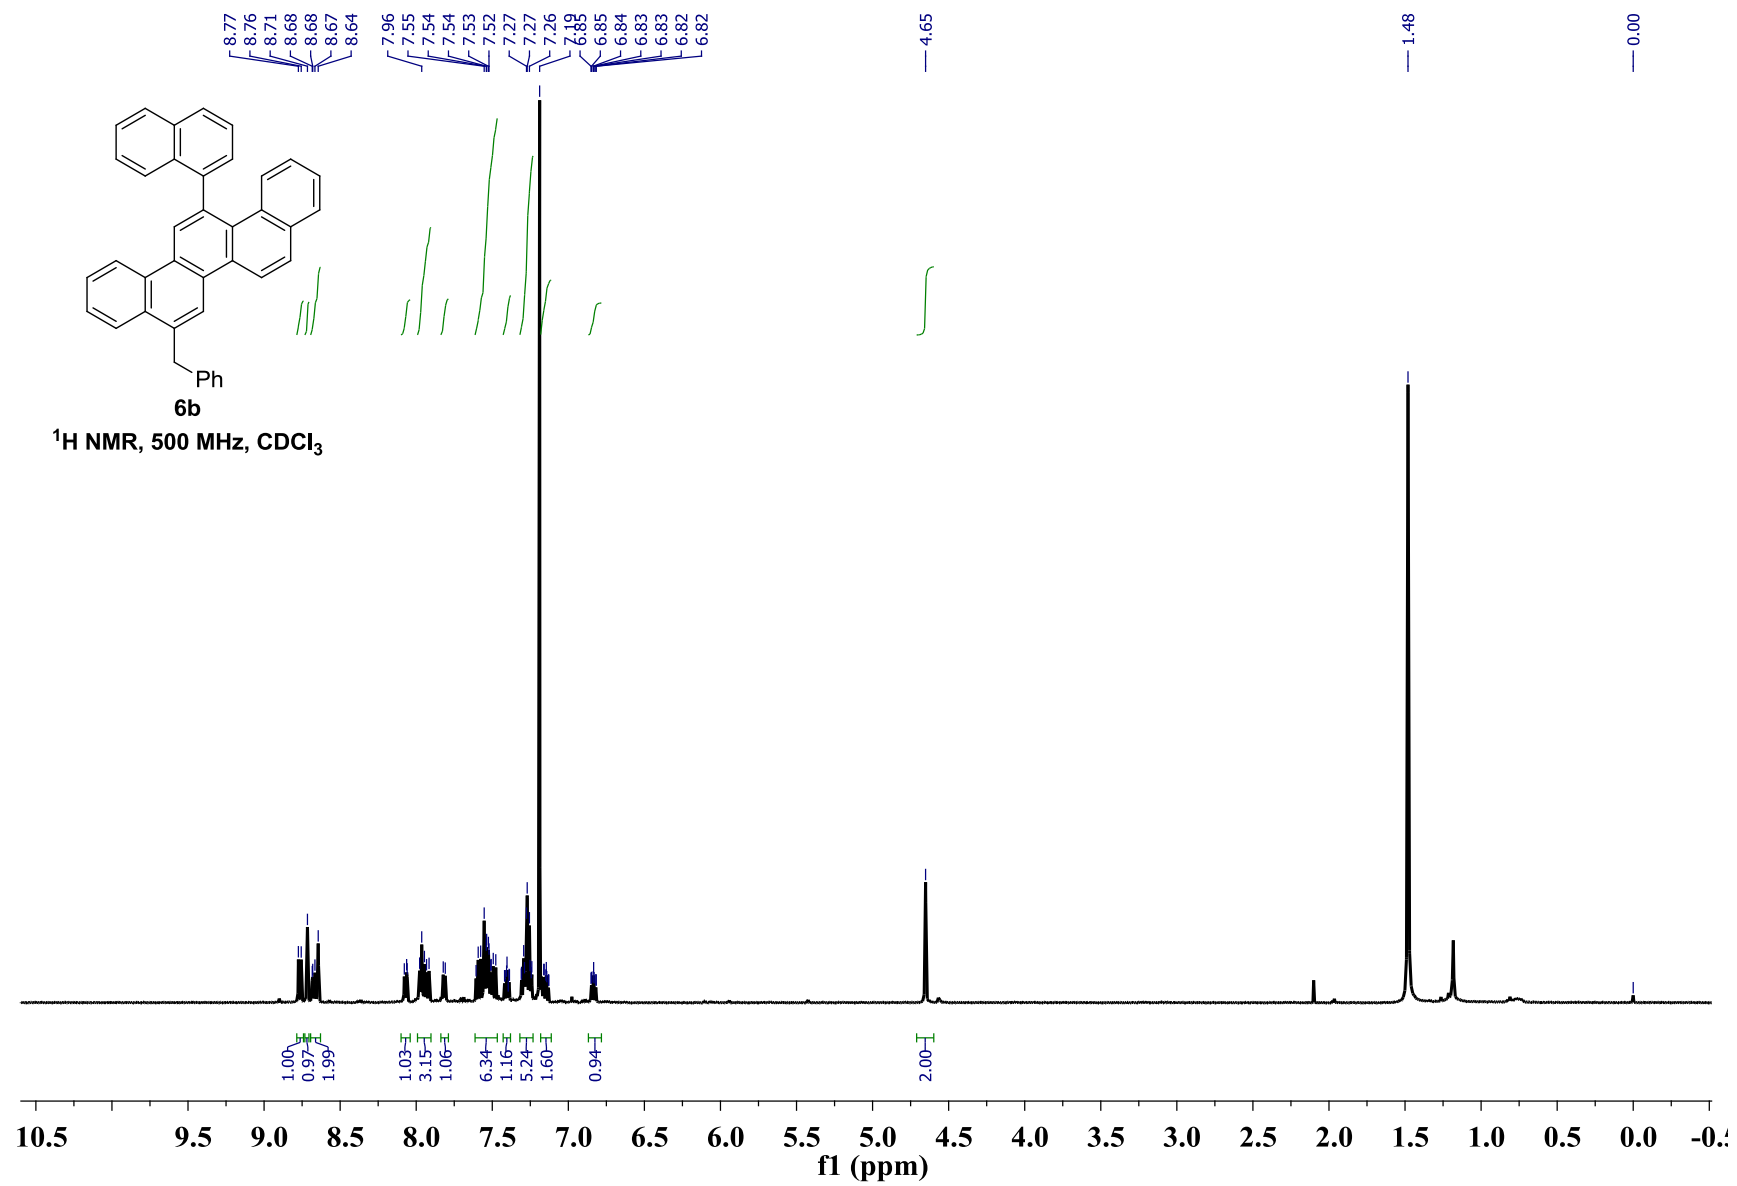

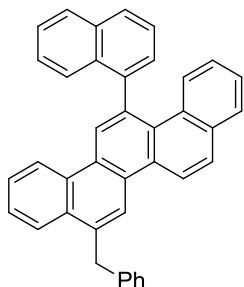

**6b**

<sup>13</sup>C NMR, 125 MHz, CDCl<sub>3</sub>

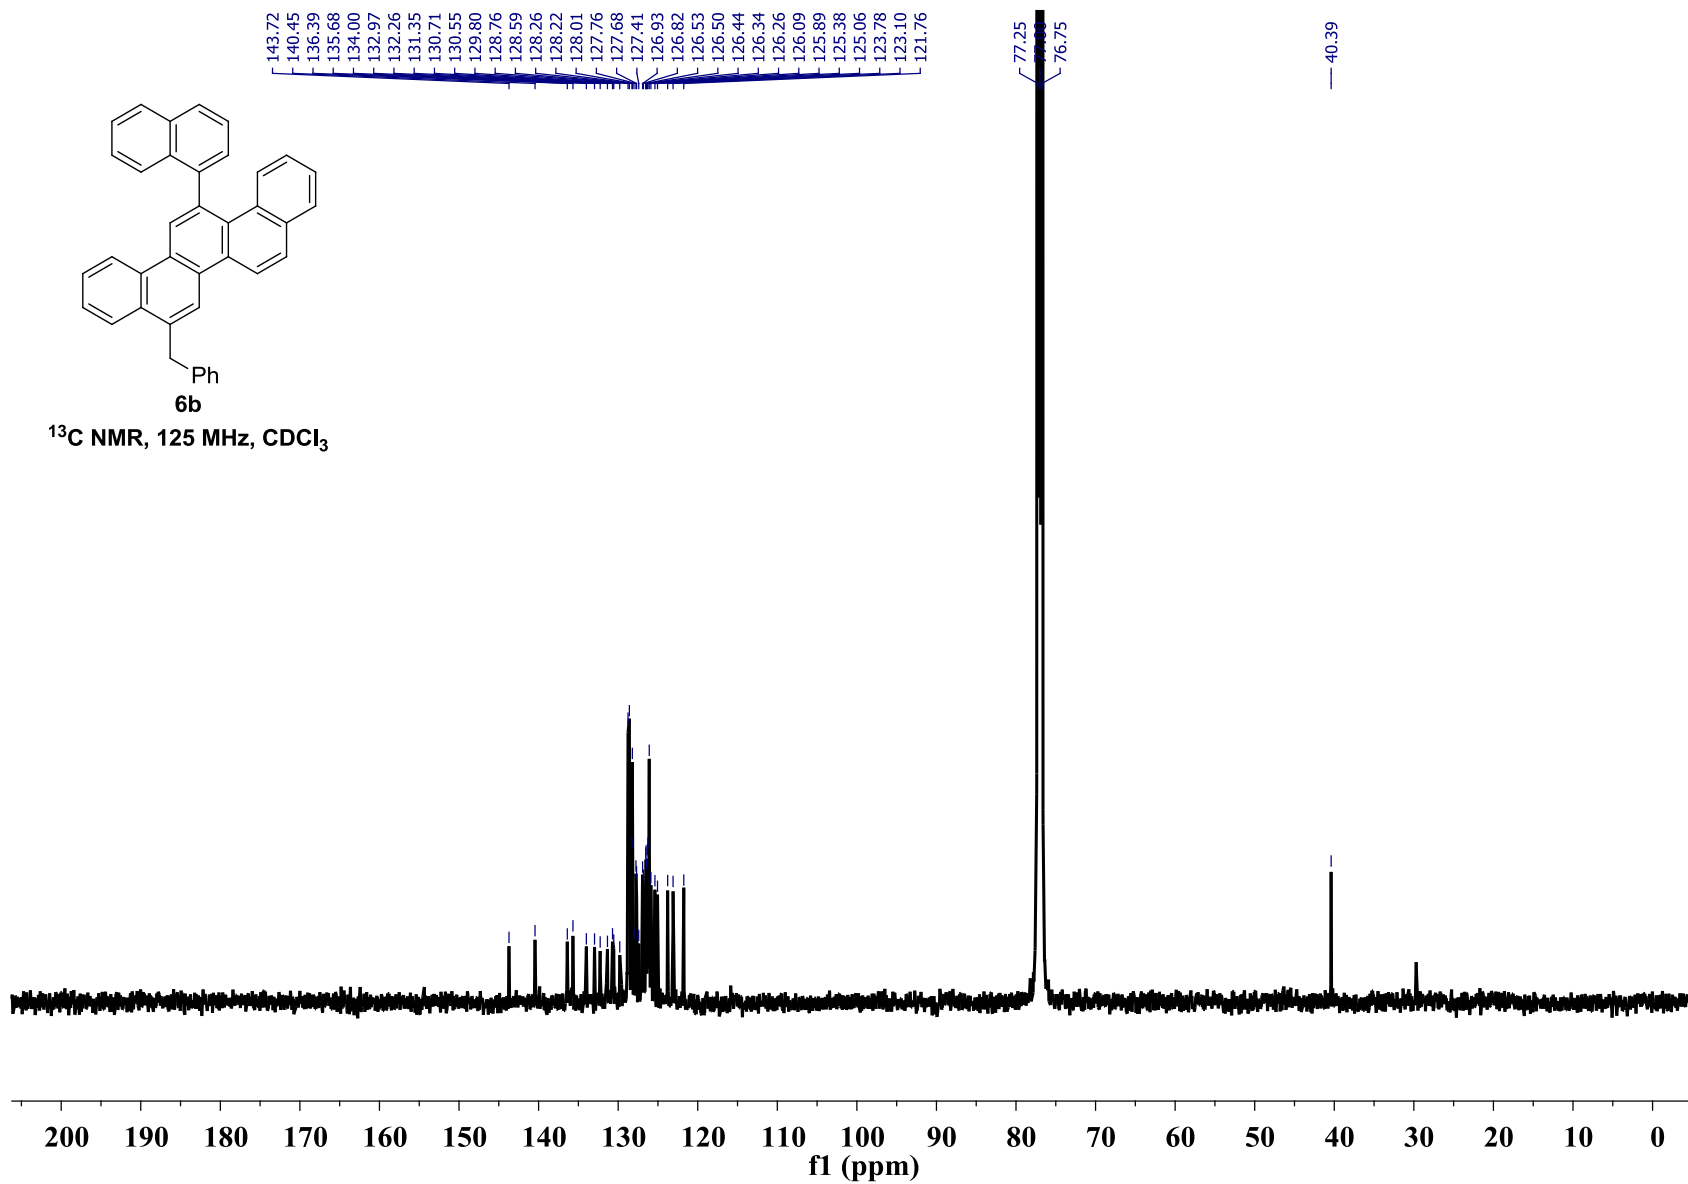

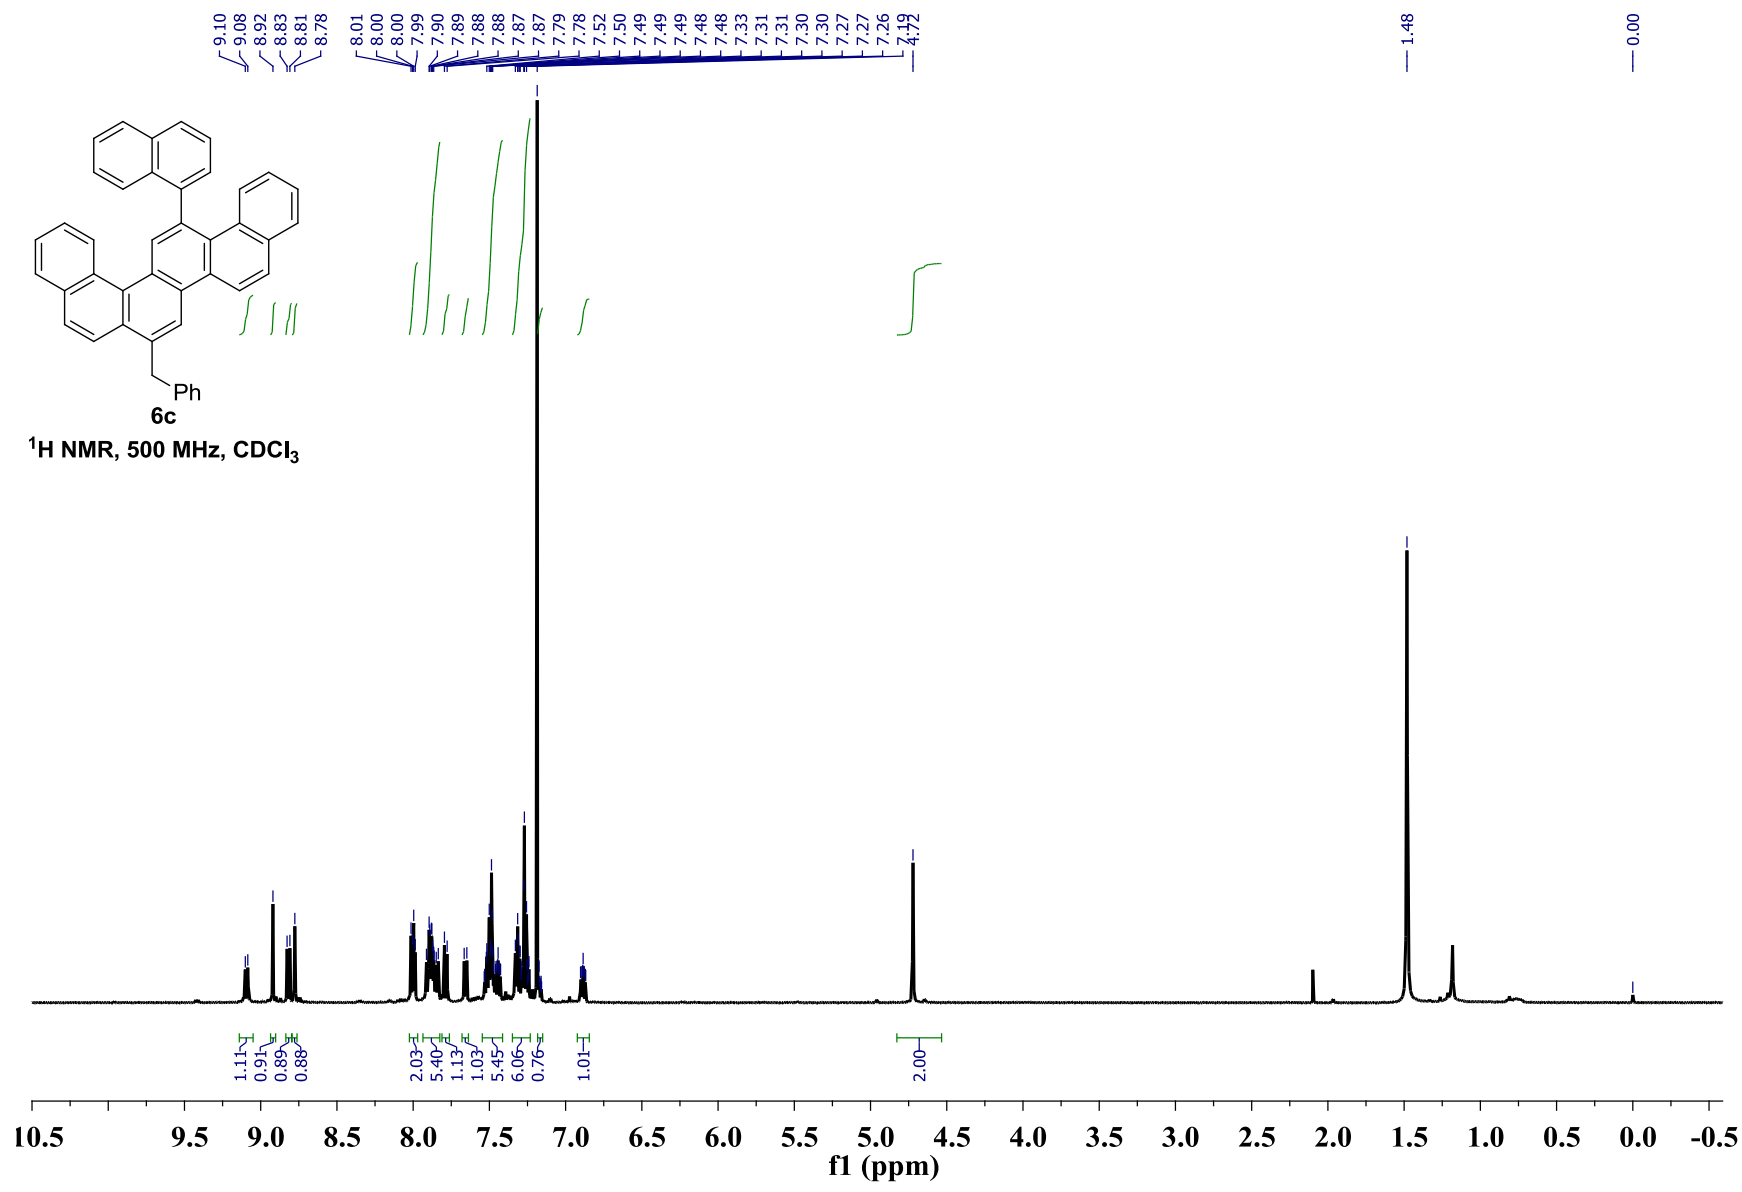

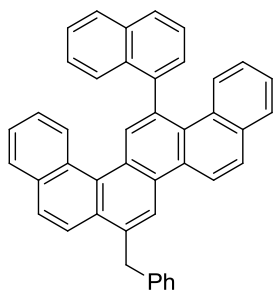

6c

<sup>13</sup>C NMR, 125 MHz, CDCl<sub>3</sub>

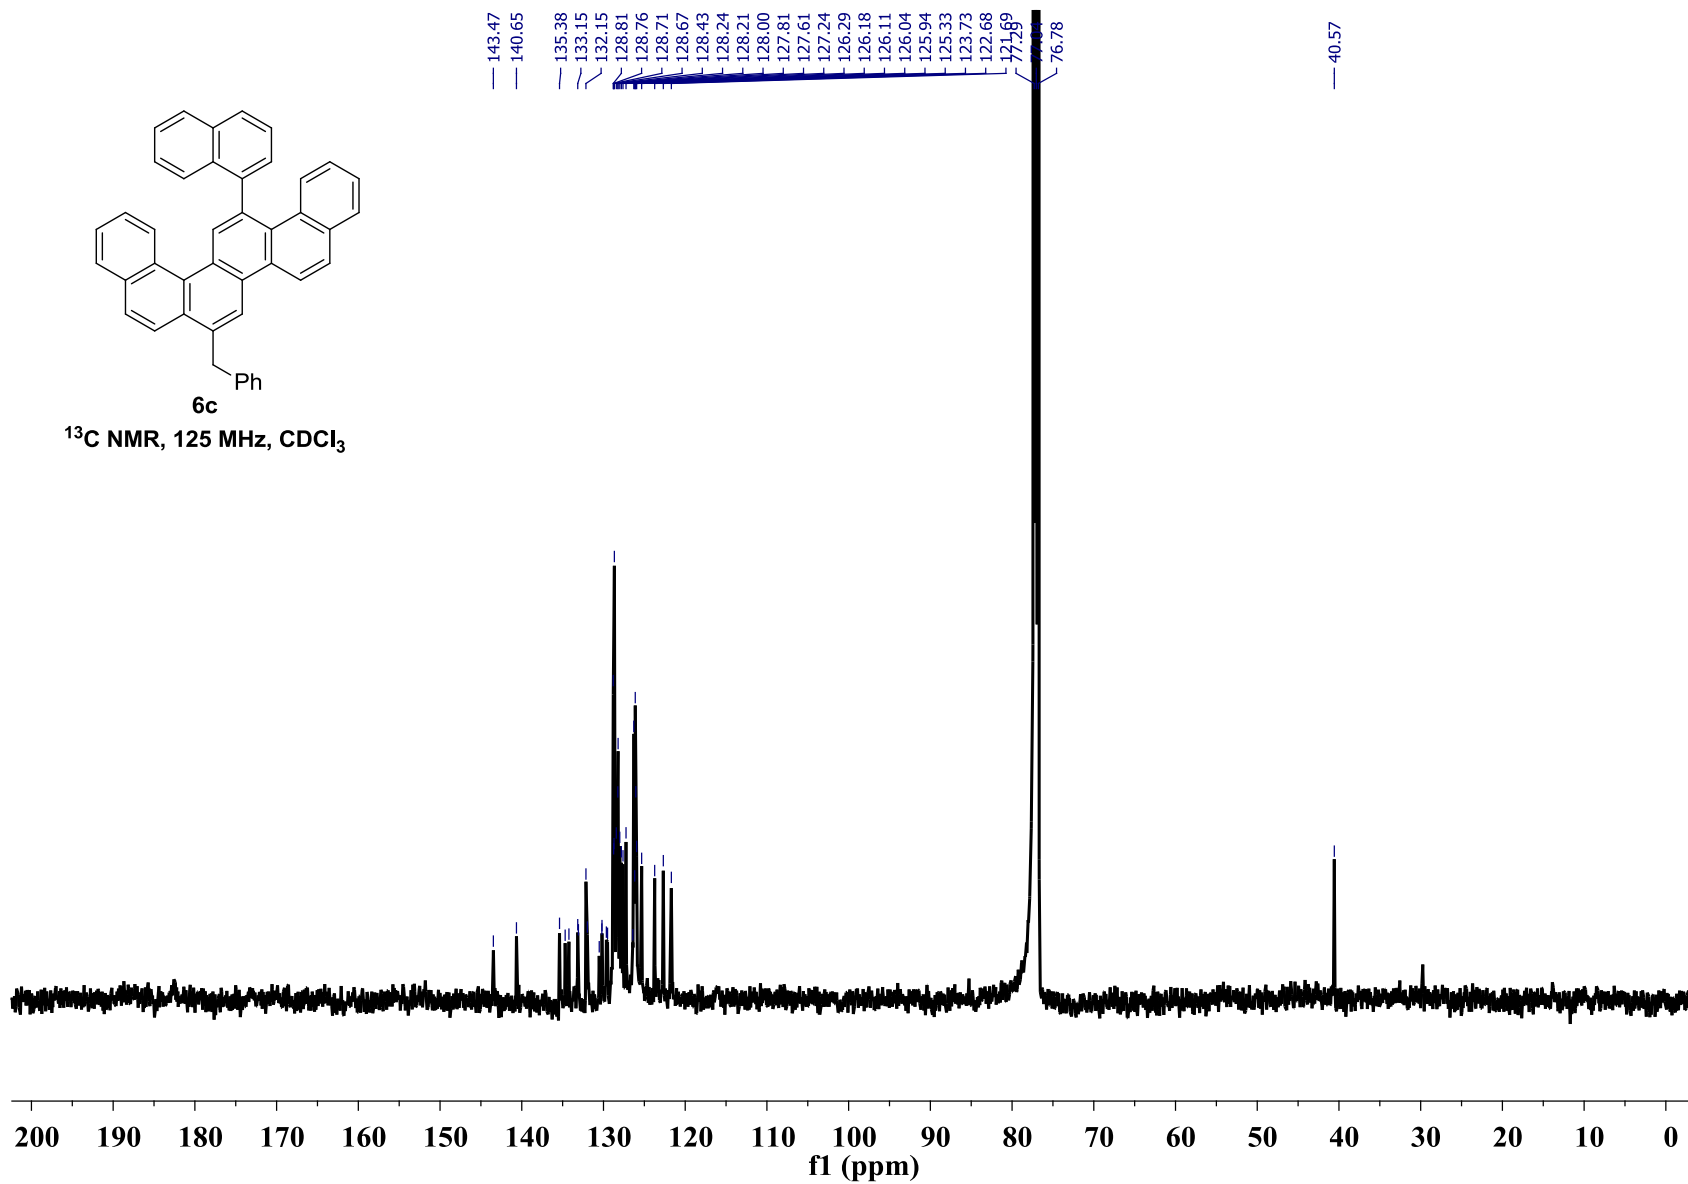

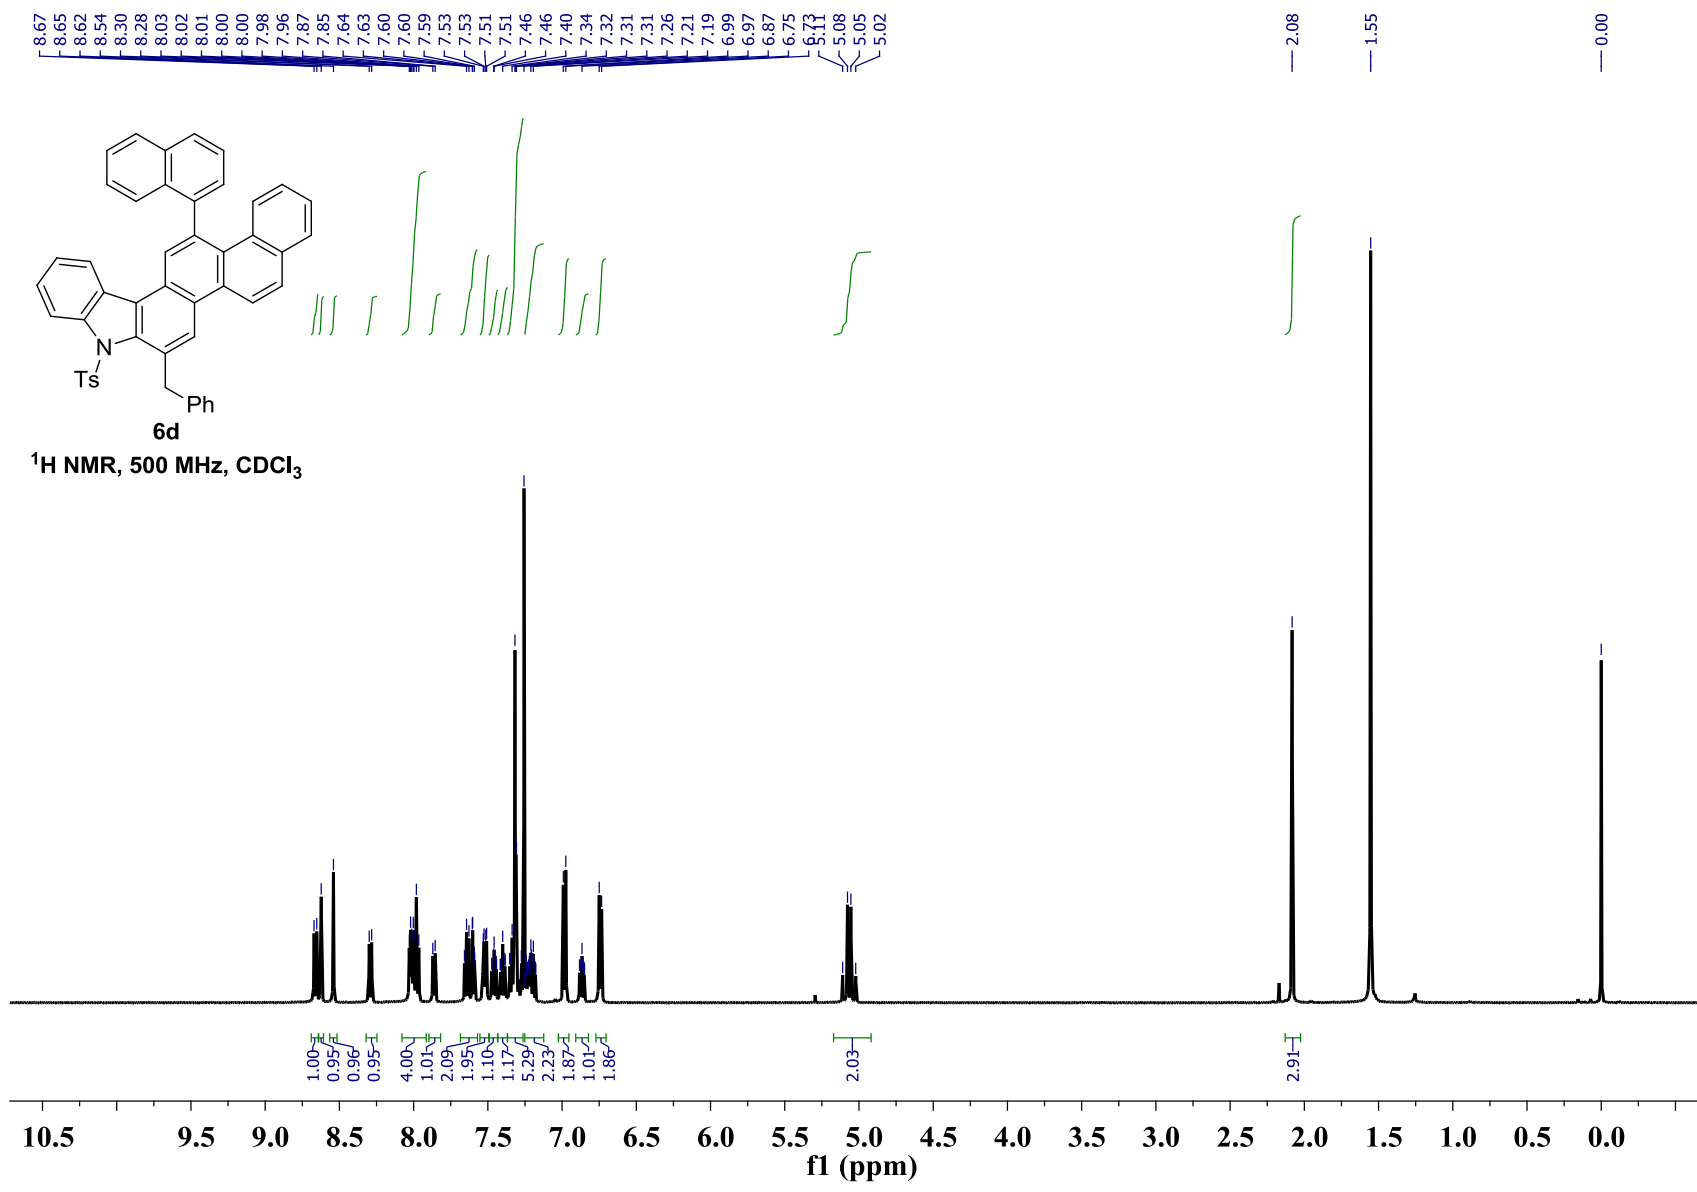

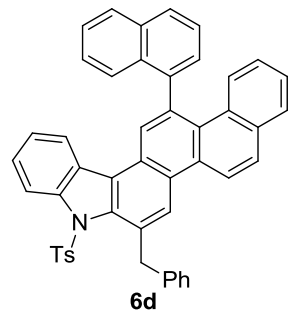

<sup>13</sup>C NMR, 75 MHz, CDCl<sub>3</sub>

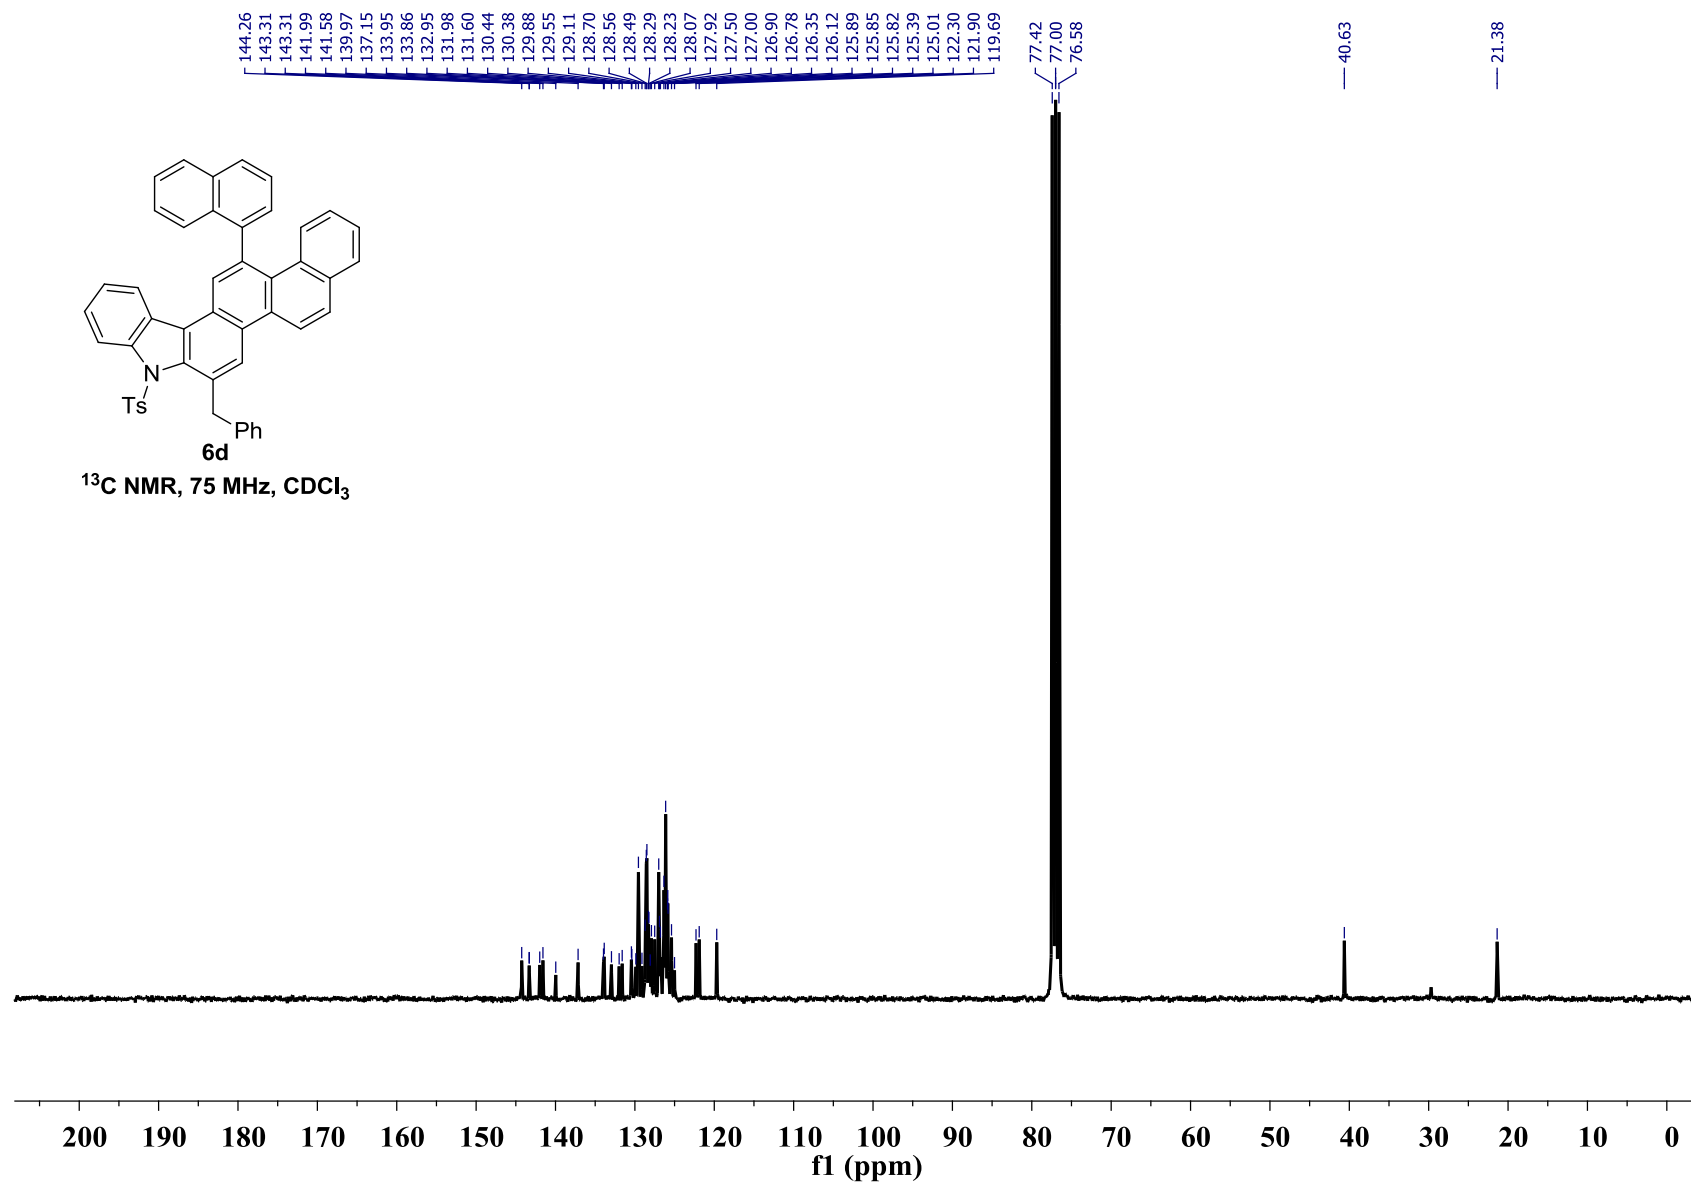

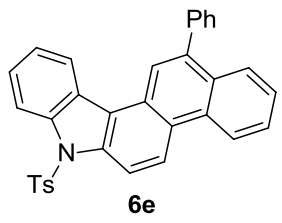

<sup>1</sup>H NMR, 500 MHz, CDCl<sub>3</sub>

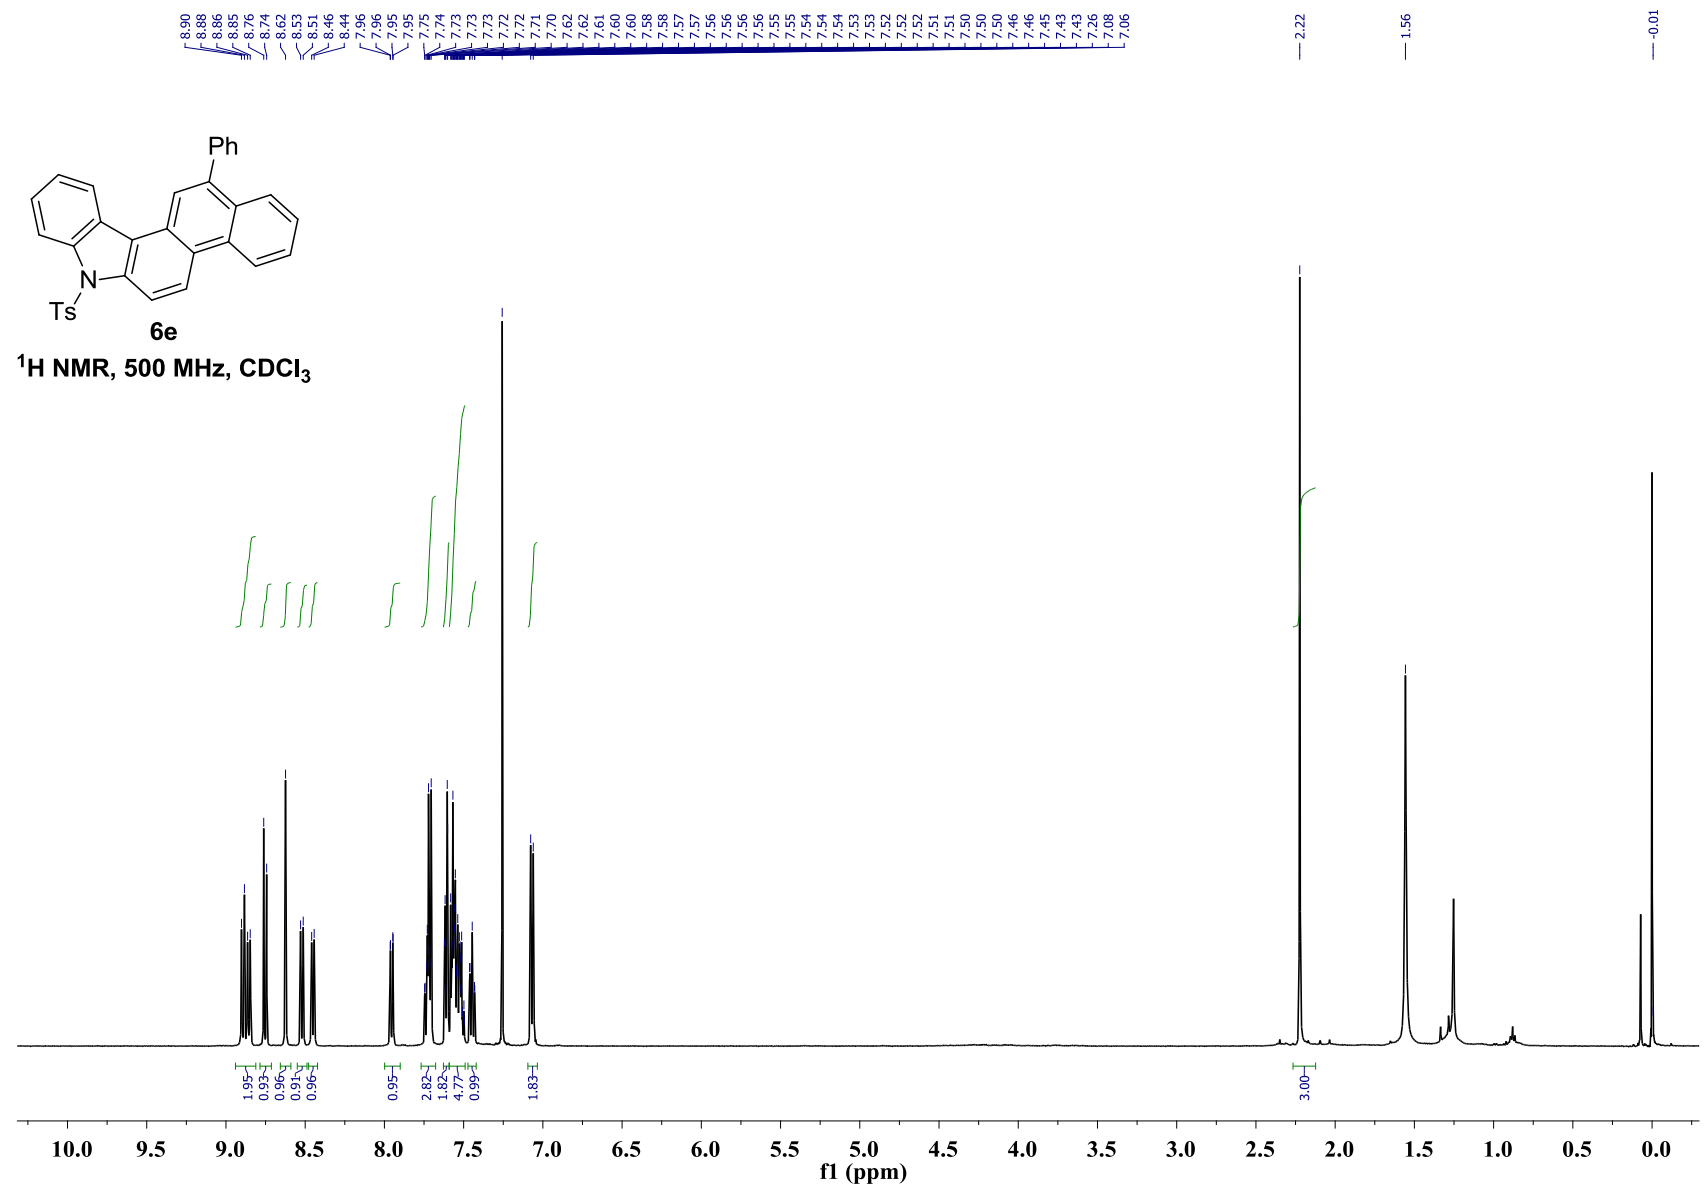

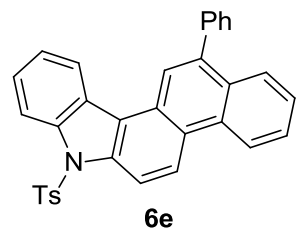

<sup>13</sup>C NMR, 100 MHz, CDCl<sub>3</sub>

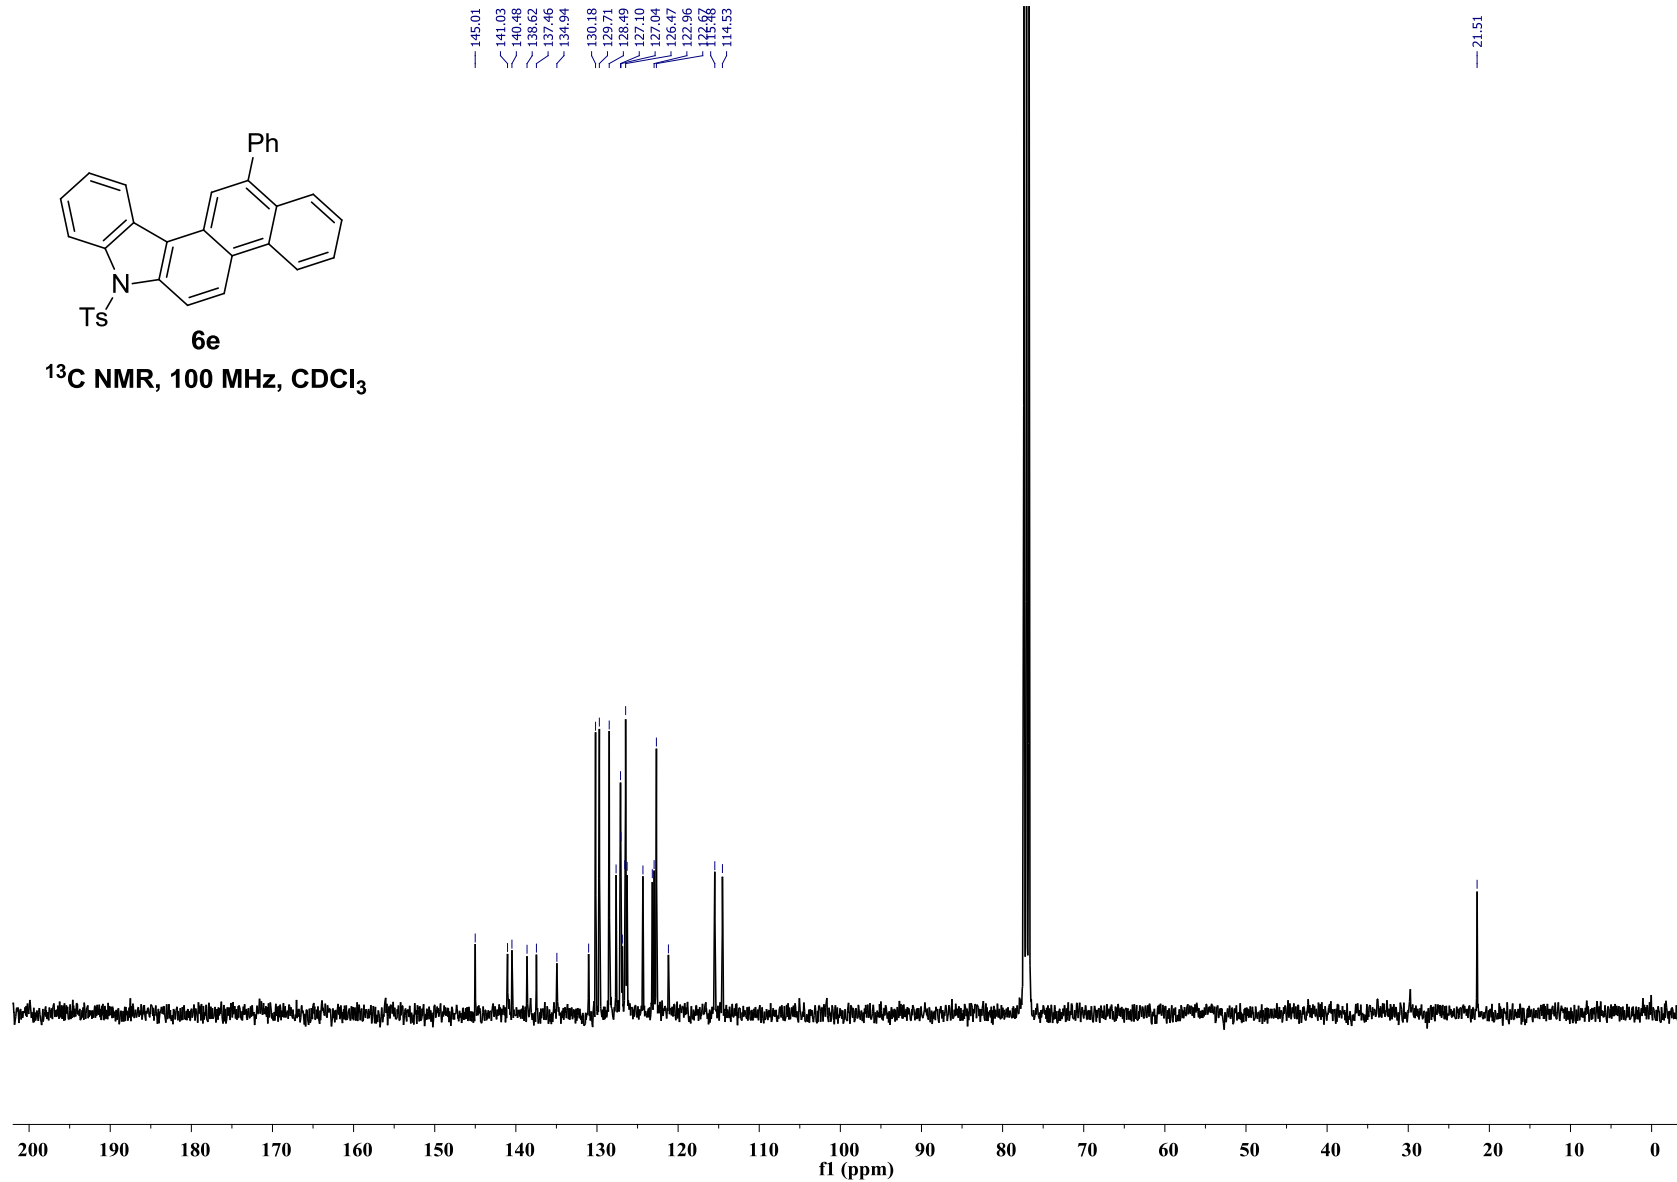



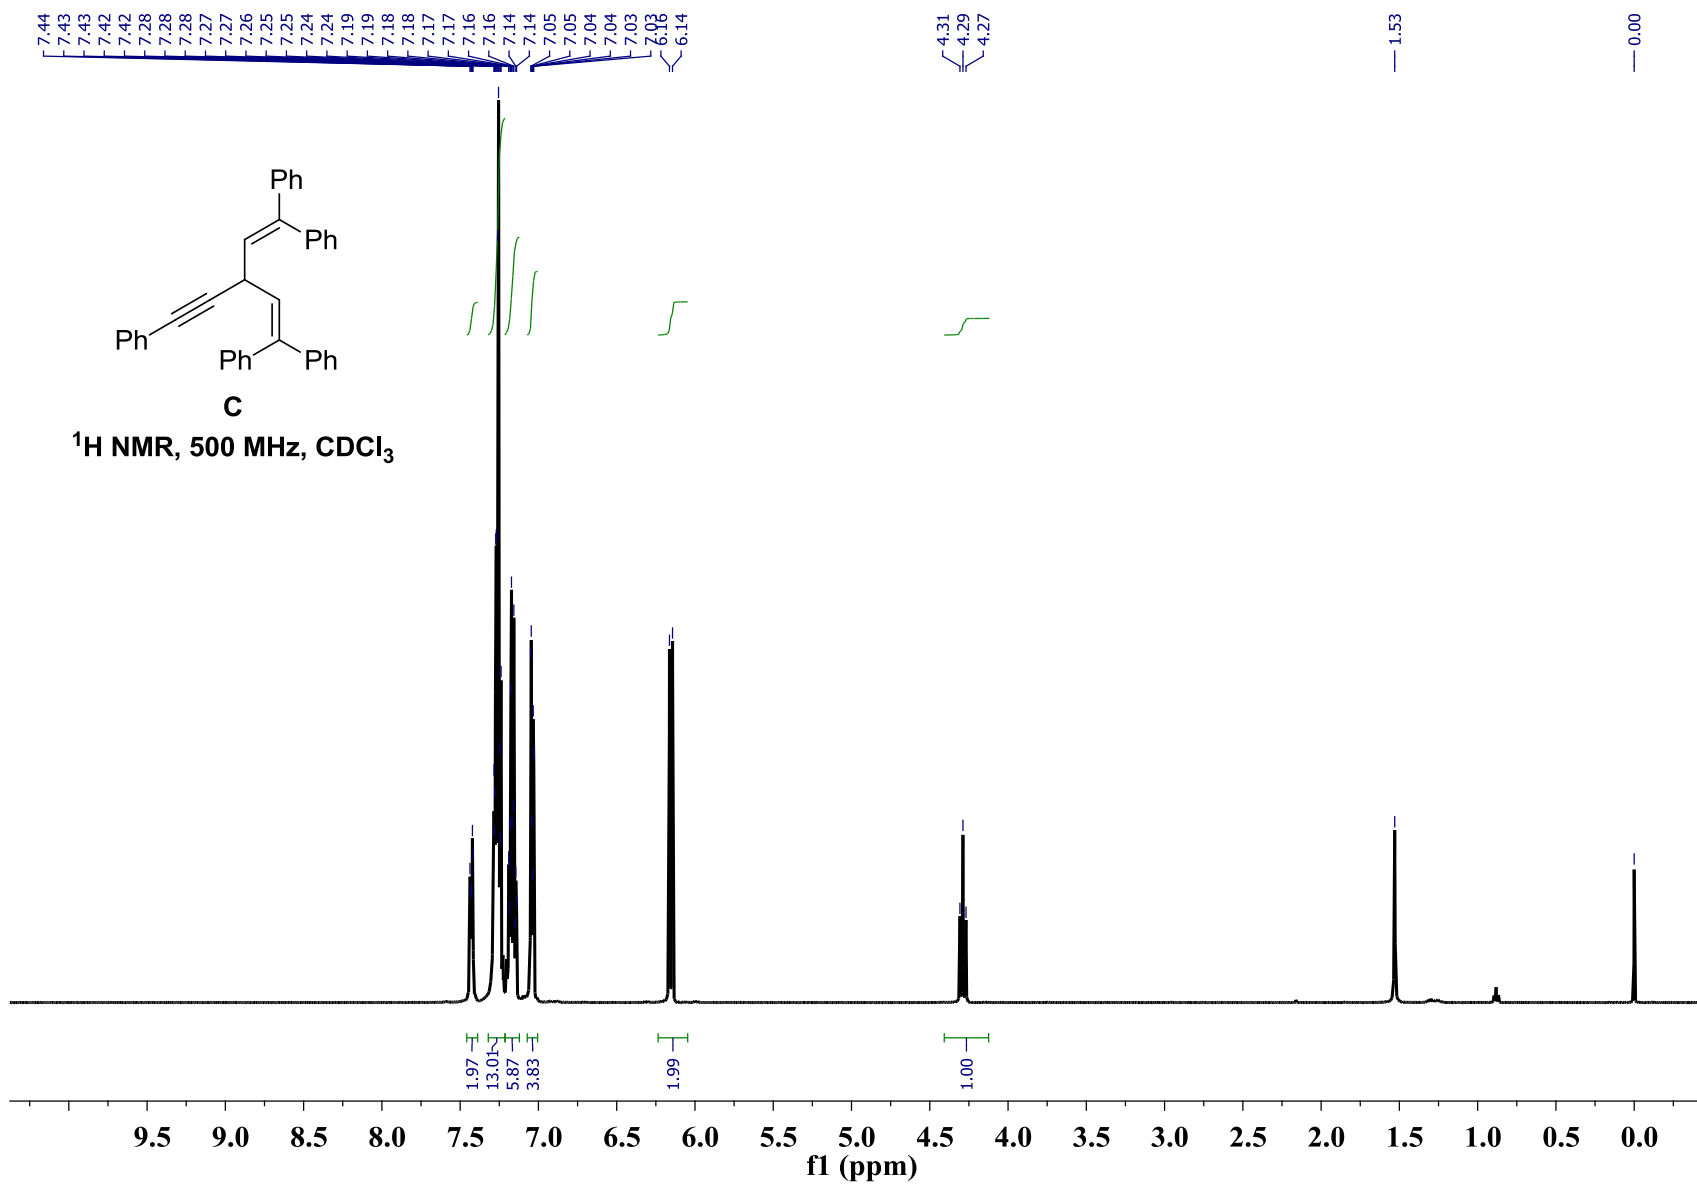

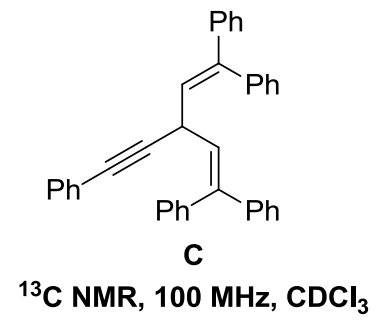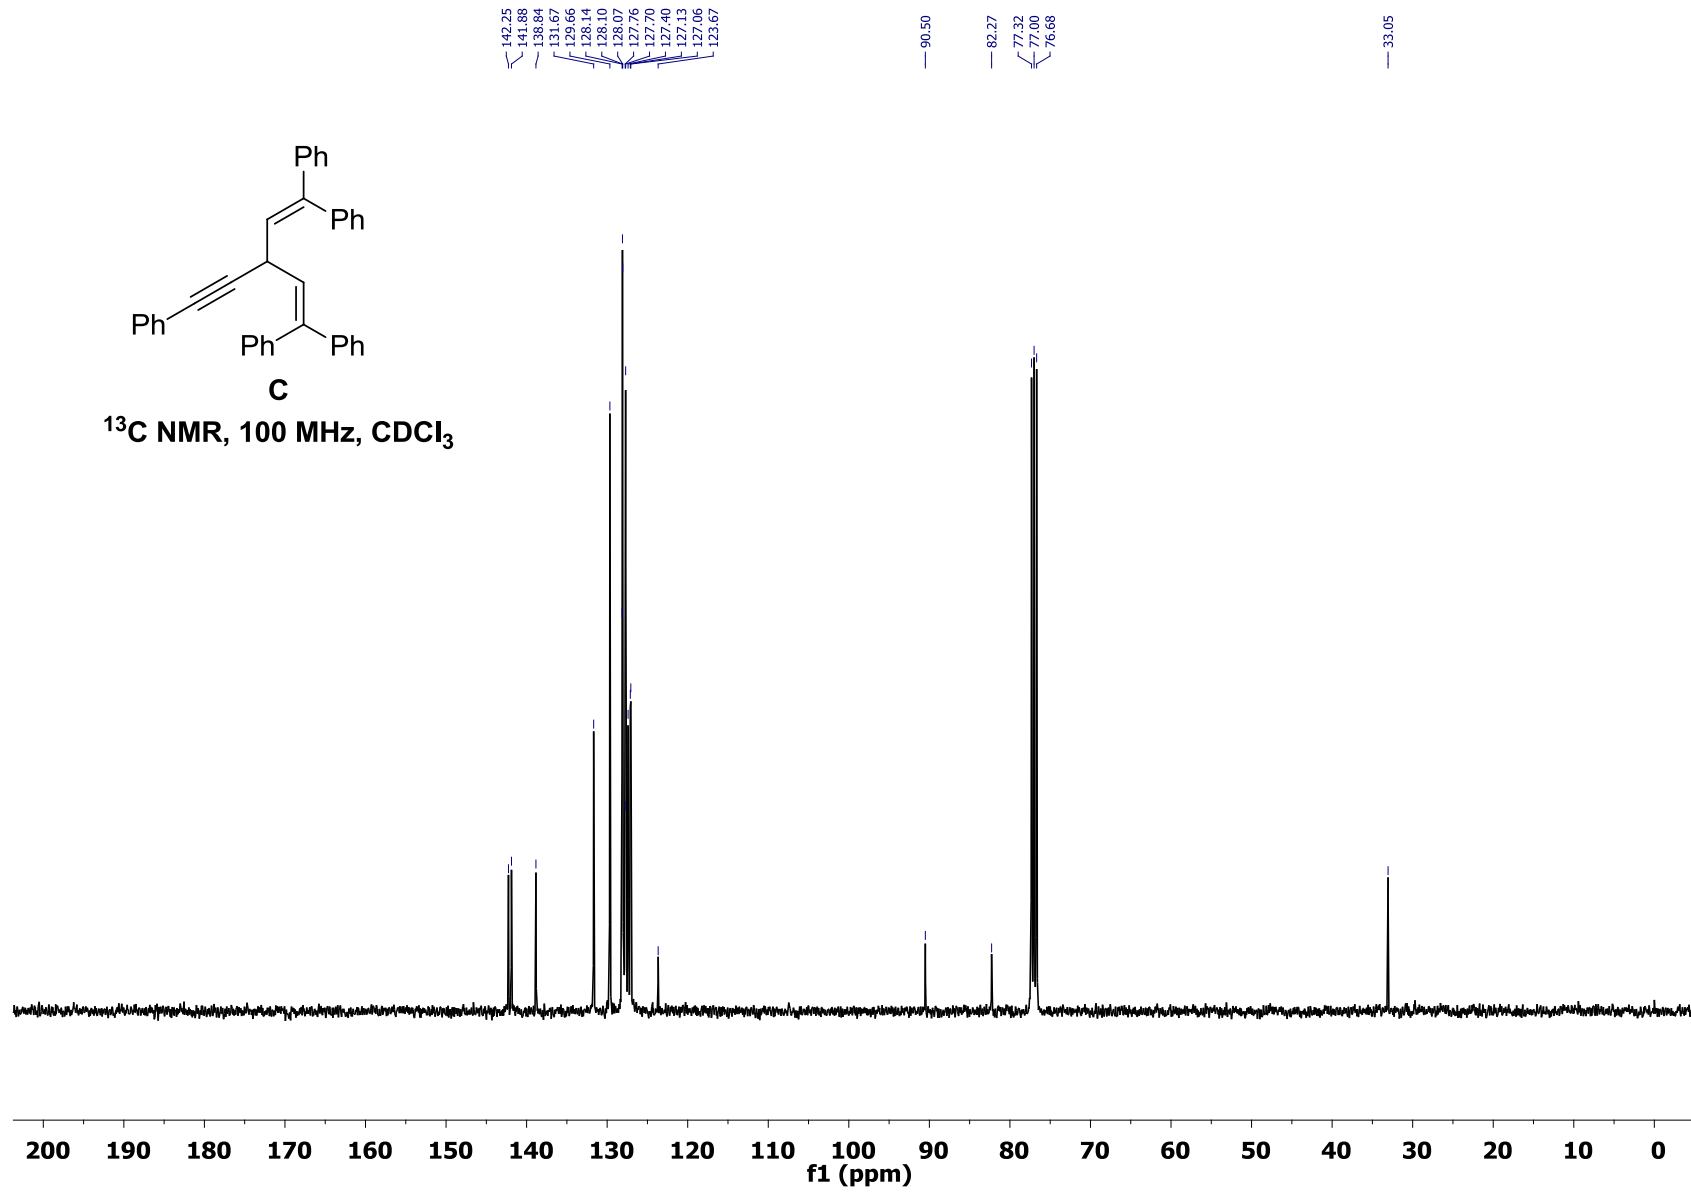

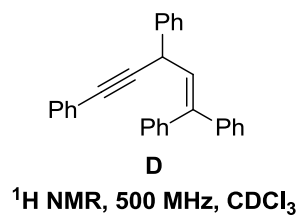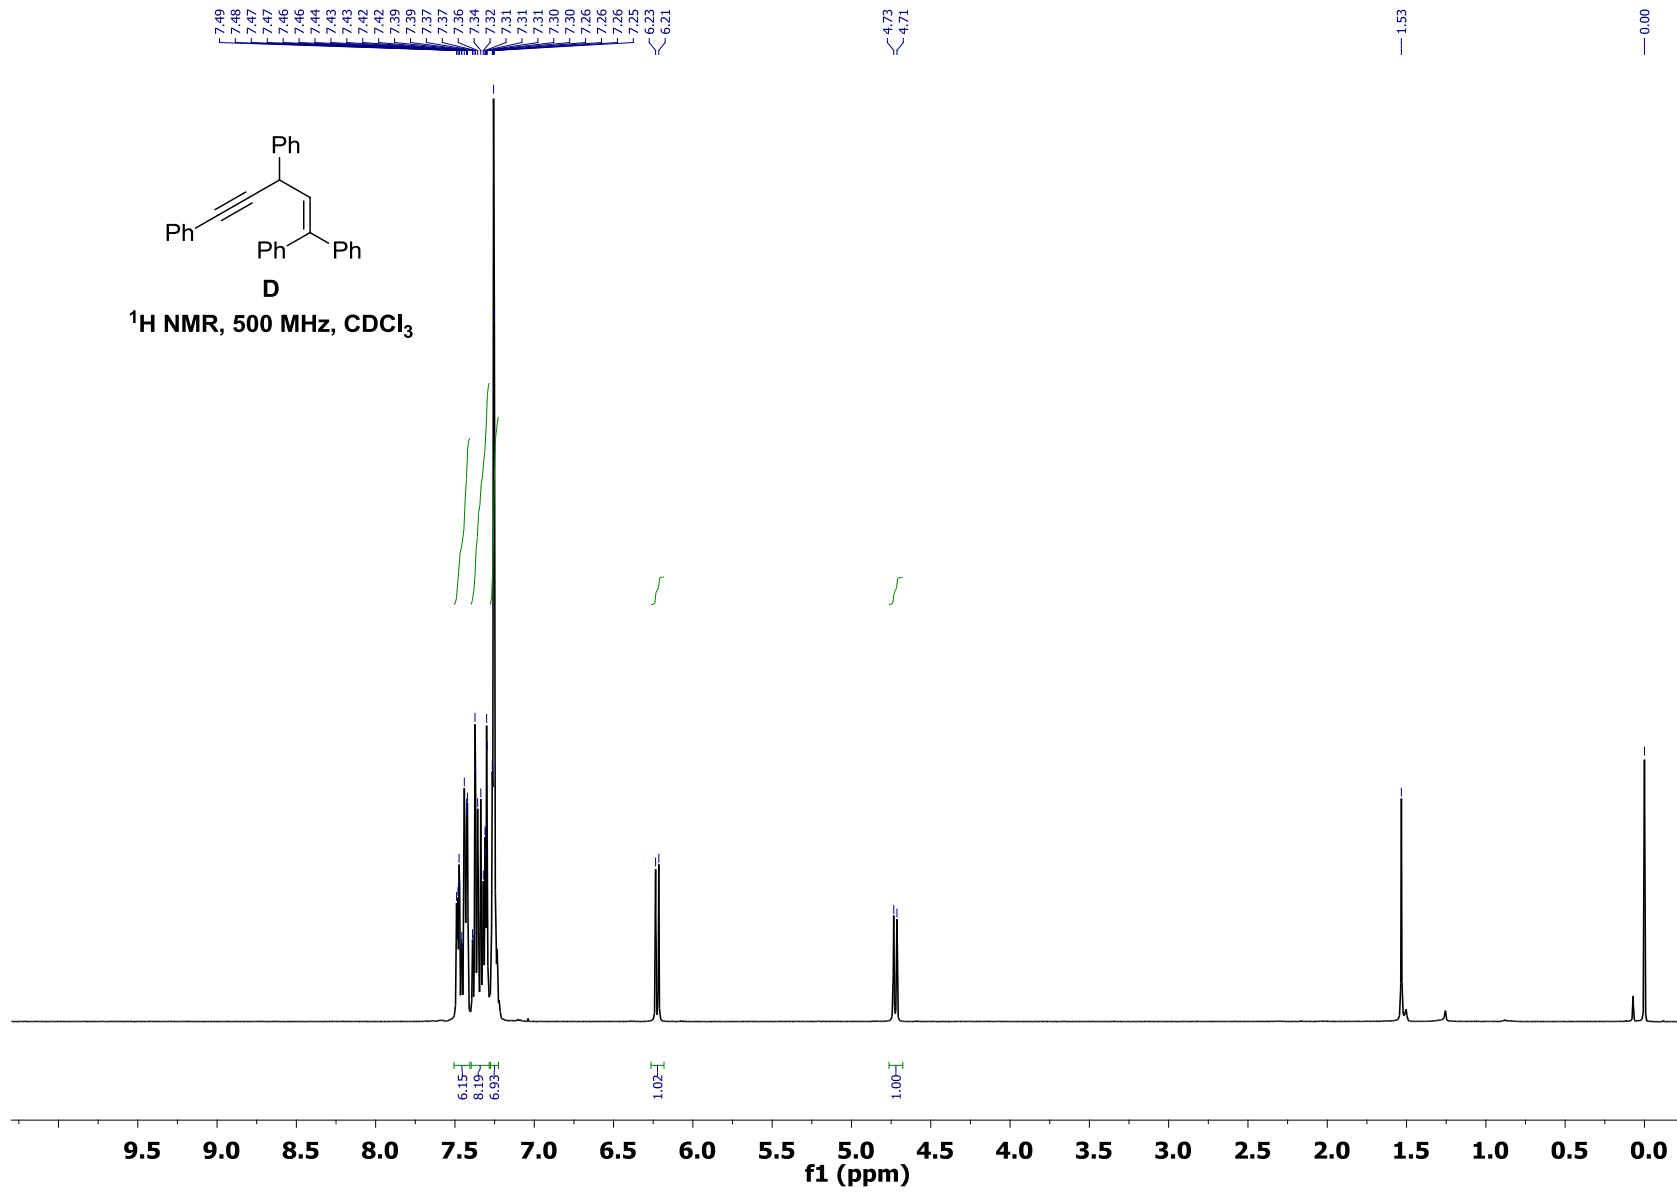

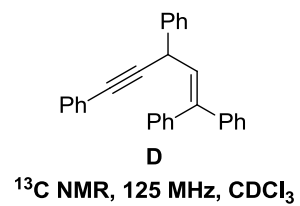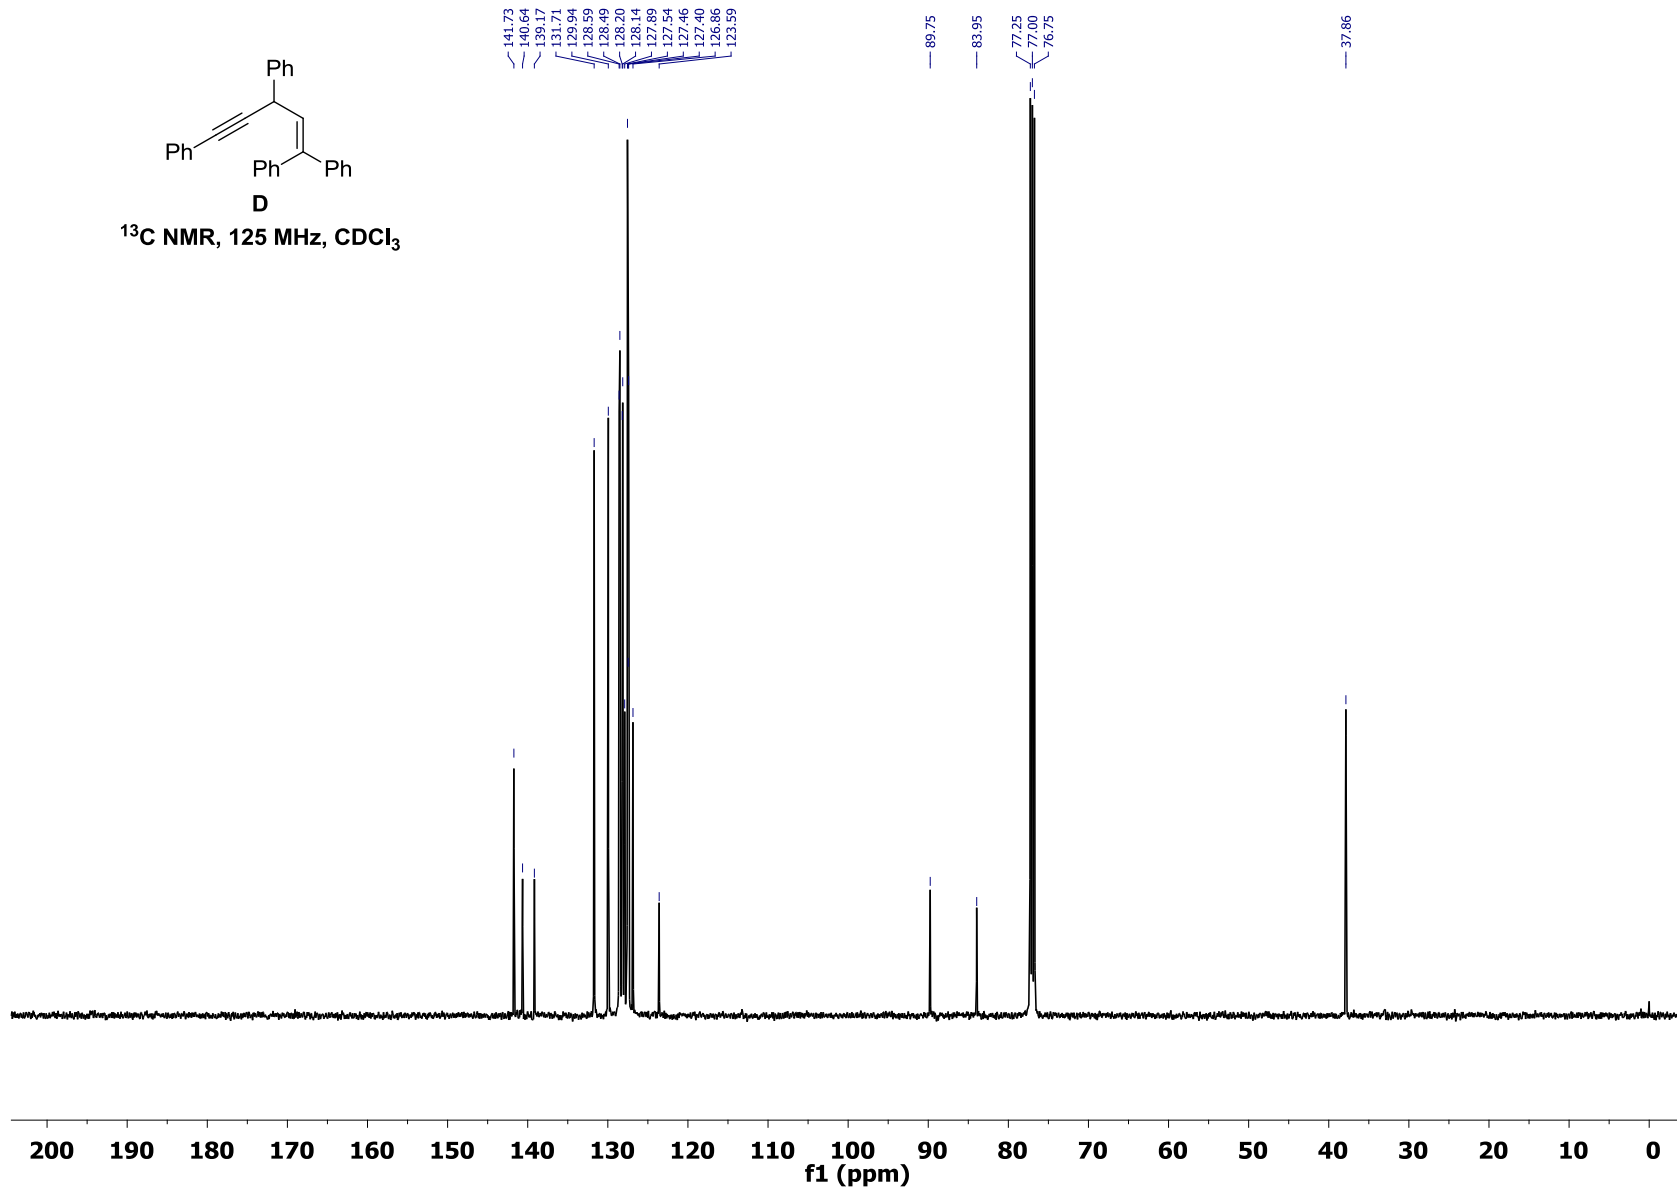

Supplement: c6cc09108c1.pdf [file c6cc09108c1.pdf]
